# Supplementary material for: Dynamics of broad H3K4me3 domains uncover an epigenetic switch between cell identity and cancer-related genes
Source: HighWire-hosted journal article supplement (doi:10.1101/gr.266924.120), 2021-06-23
Supplement: Supplemental_Fig_S2.pdf [file Supplemental_Fig_S2.pdf]

**A**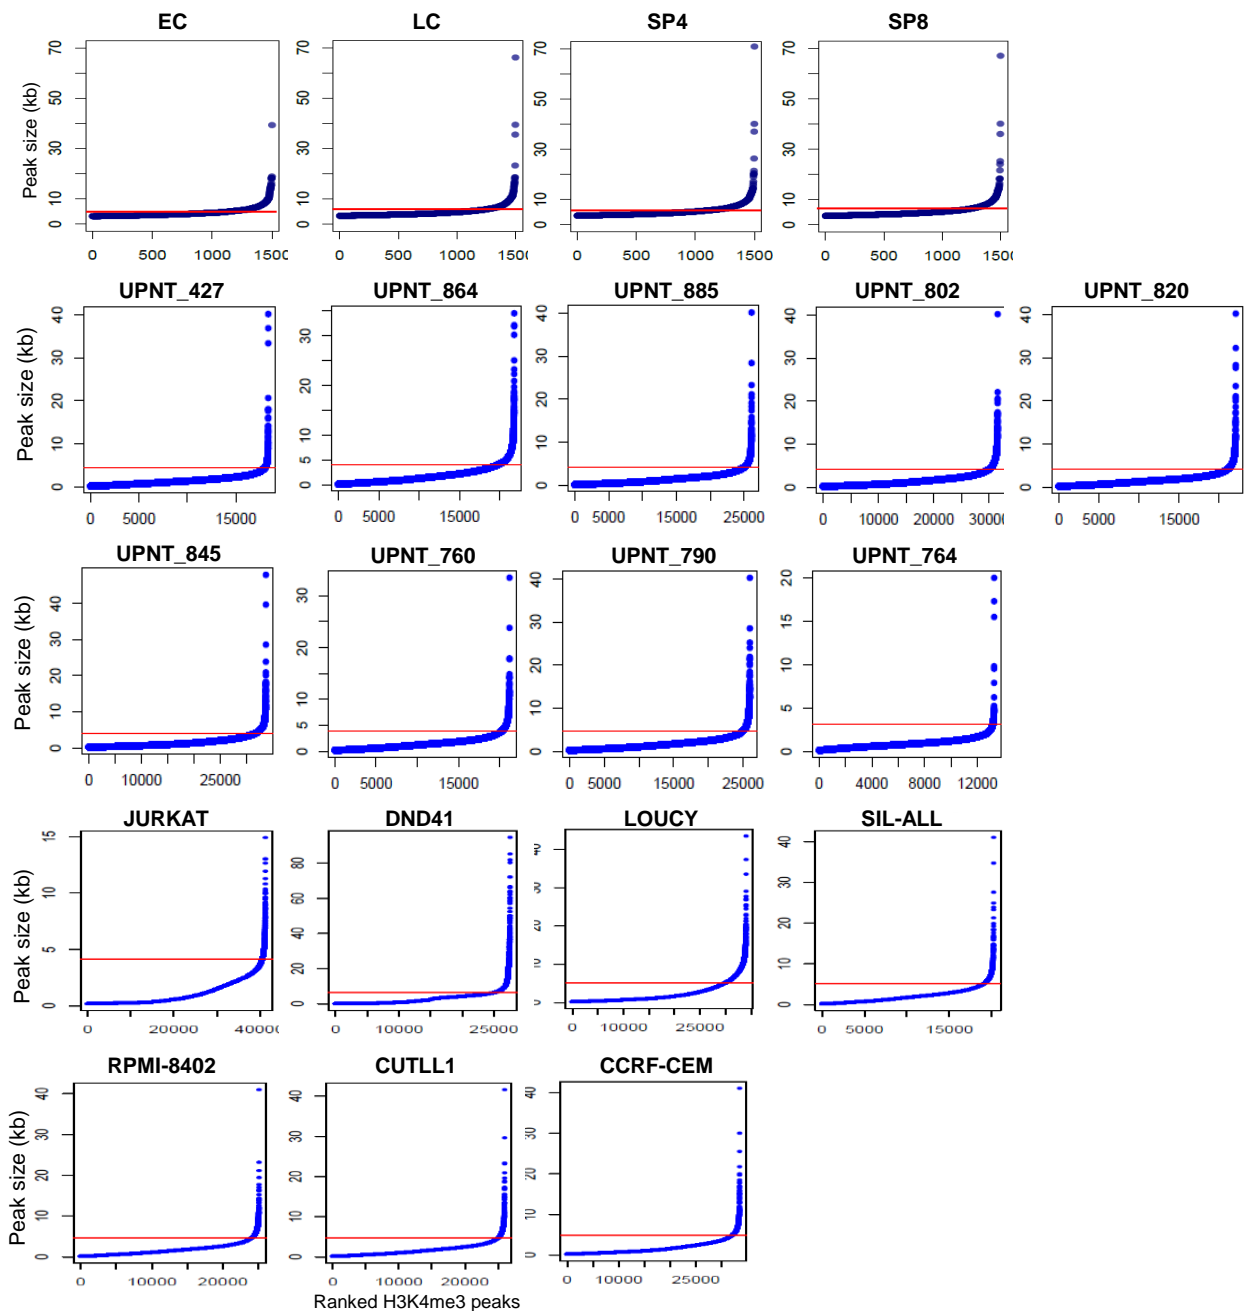**B**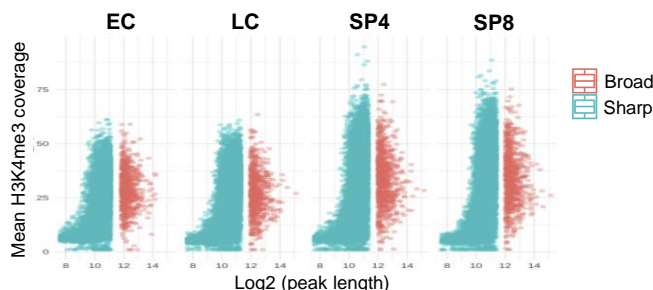**C**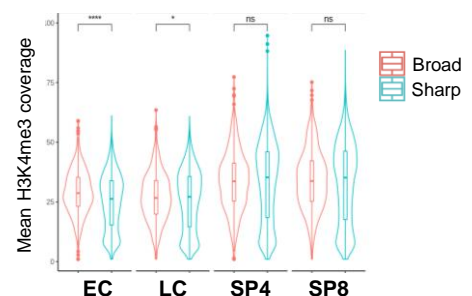

**Supplemental Figure S2: Identification of Broad H3K4me3 domains in the different samples. A)** The H3K4me3 peaks were ranked in function of their size for thymic T cell subpopulations, primary T-ALL samples and T-ALL cell lines. The inflection point allowing the selection of Broad H3K4me3 domain is indicated by a red line. **B)** Comparison of H3K4me3 signal and peak length for the H3K4me3 sharp peaks and broad H3K4me3 domain in the indicated T cell samples. **C)** Distribution of H3K4me3 signal at H3K4me3 sharp peaks and Broad H3K4me3 domain in the indicated T cell samples. Significance was assessed by a Wilcoxon test. \*\*\* $P < 0.001$ , \*  $P < 0.05$ ; ns, not significant.
