# Supplementary material for: Dynamics of broad H3K4me3 domains uncover an epigenetic switch between cell identity and cancer-related genes
Source: HighWire-hosted journal article supplement (doi:10.1101/gr.266924.120), 2021-06-23
Supplement: Supplemental_Fig_S3.pdf [file Supplemental_Fig_S3.pdf]

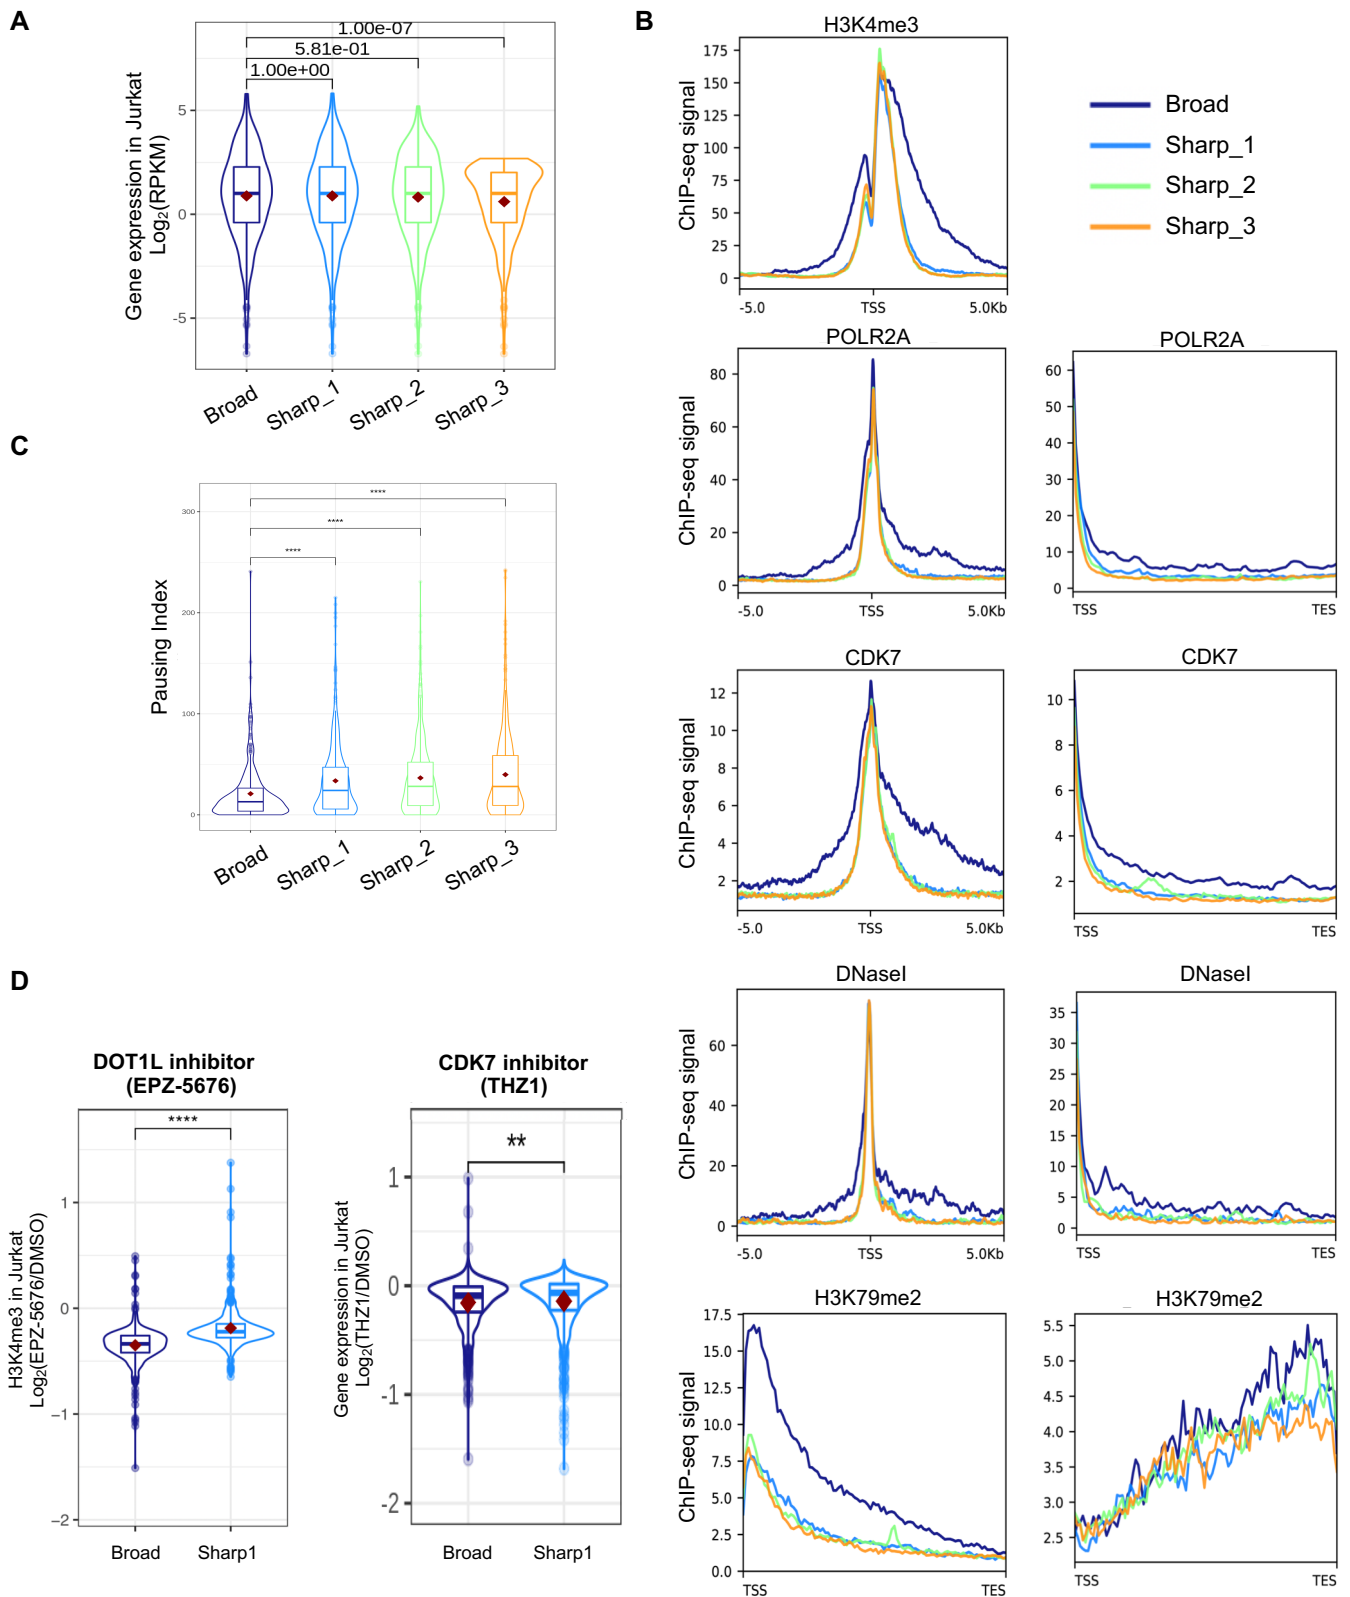

**Supplemental Figure S3. Transcriptional elongation profiles of broad H3K4me3 domain-associated genes.** **A)** Distribution of gene expression of broad H3K4me3 domain-associated genes and three sets of sharp-associated genes in Jurkat cells. **B)** Average profiles of the indicated ChIP-seq signal at broad H3K4me3 domain- and sharp-associated genes in Jurkat cells. **C)** Distribution of POLR2A pausing index at broad H3K4me3 domain- and sharp-associated genes in Jurkat cells. **D)** Box plots displaying the fold change of H3K4me3 signal (left panel) and gene expression (right panel) after treatment of Jurkat cells with either EPZ-5676 or THZ1 inhibitors, respectively. Significance in A was assessed by Kolmogorov-Smirnoff. Significance in C and D was assessed by one-sided Wilcoxon rank-sum test. \*\*\*\* $P < 0.0001$ , \*\* $P < 0.01$ .
