# Supplementary material for: Dynamics of broad H3K4me3 domains uncover an epigenetic switch between cell identity and cancer-related genes
Source: HighWire-hosted journal article supplement (doi:10.1101/gr.266924.120), 2021-06-23
Supplement: Supplemental_Fig_S4.pdf [file Supplemental_Fig_S4.pdf]

**A**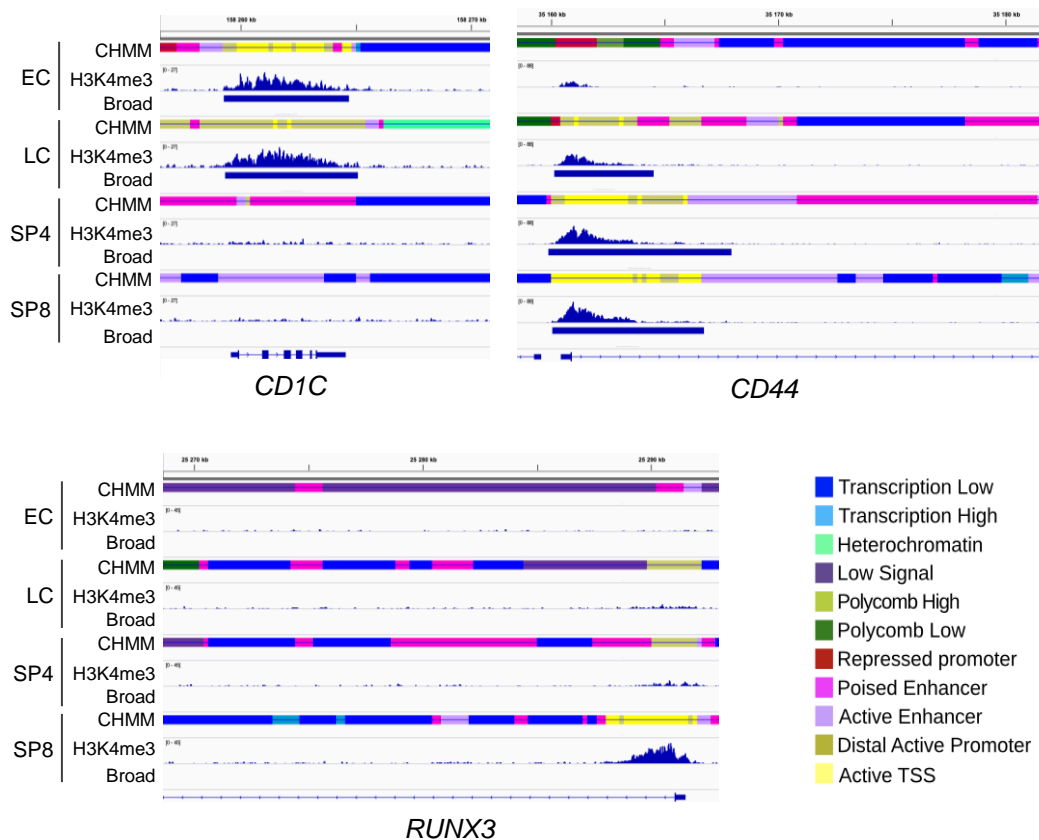**B**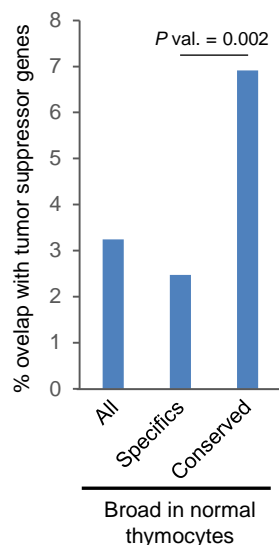**C**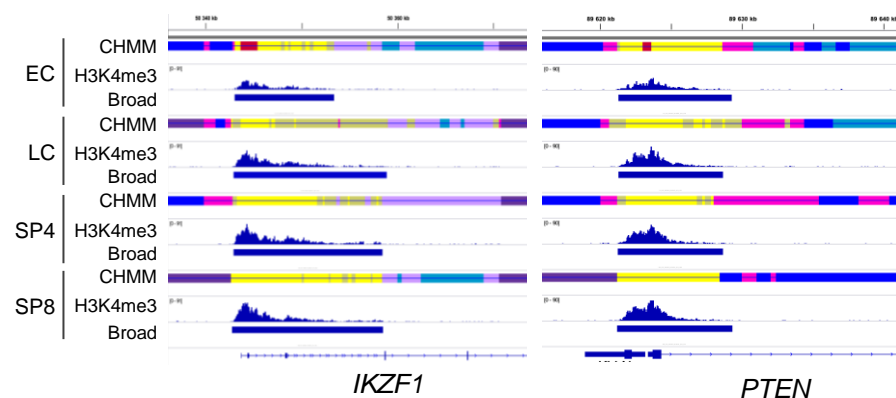

**Supplemental Figure S4: A.** Additional examples of dynamic broad H3K4me3 domain loci in normal thymocytes. Legends are as in Figure 1E. **B.** Percentage of overlap between T-ALL tumor suppressors (Supplemental Table S5) and broad H3K4me3 domains found only in thymocytes (specifics) or conserved in other normal tissues (broad present in more than 50% of ENCODE normal tissues, as defined by Chen *et al.* 2015). Two sided Fisher's exact test. **C.** Examples of tumor suppressor genes present in normal thymocytes.
