# Supplementary material for: Dynamics of broad H3K4me3 domains uncover an epigenetic switch between cell identity and cancer-related genes
Source: HighWire-hosted journal article supplement (doi:10.1101/gr.266924.120), 2021-06-23
Supplement: Supplemental_Fig_S10_V2.pdf [file Supplemental_Fig_S10_V2.pdf]

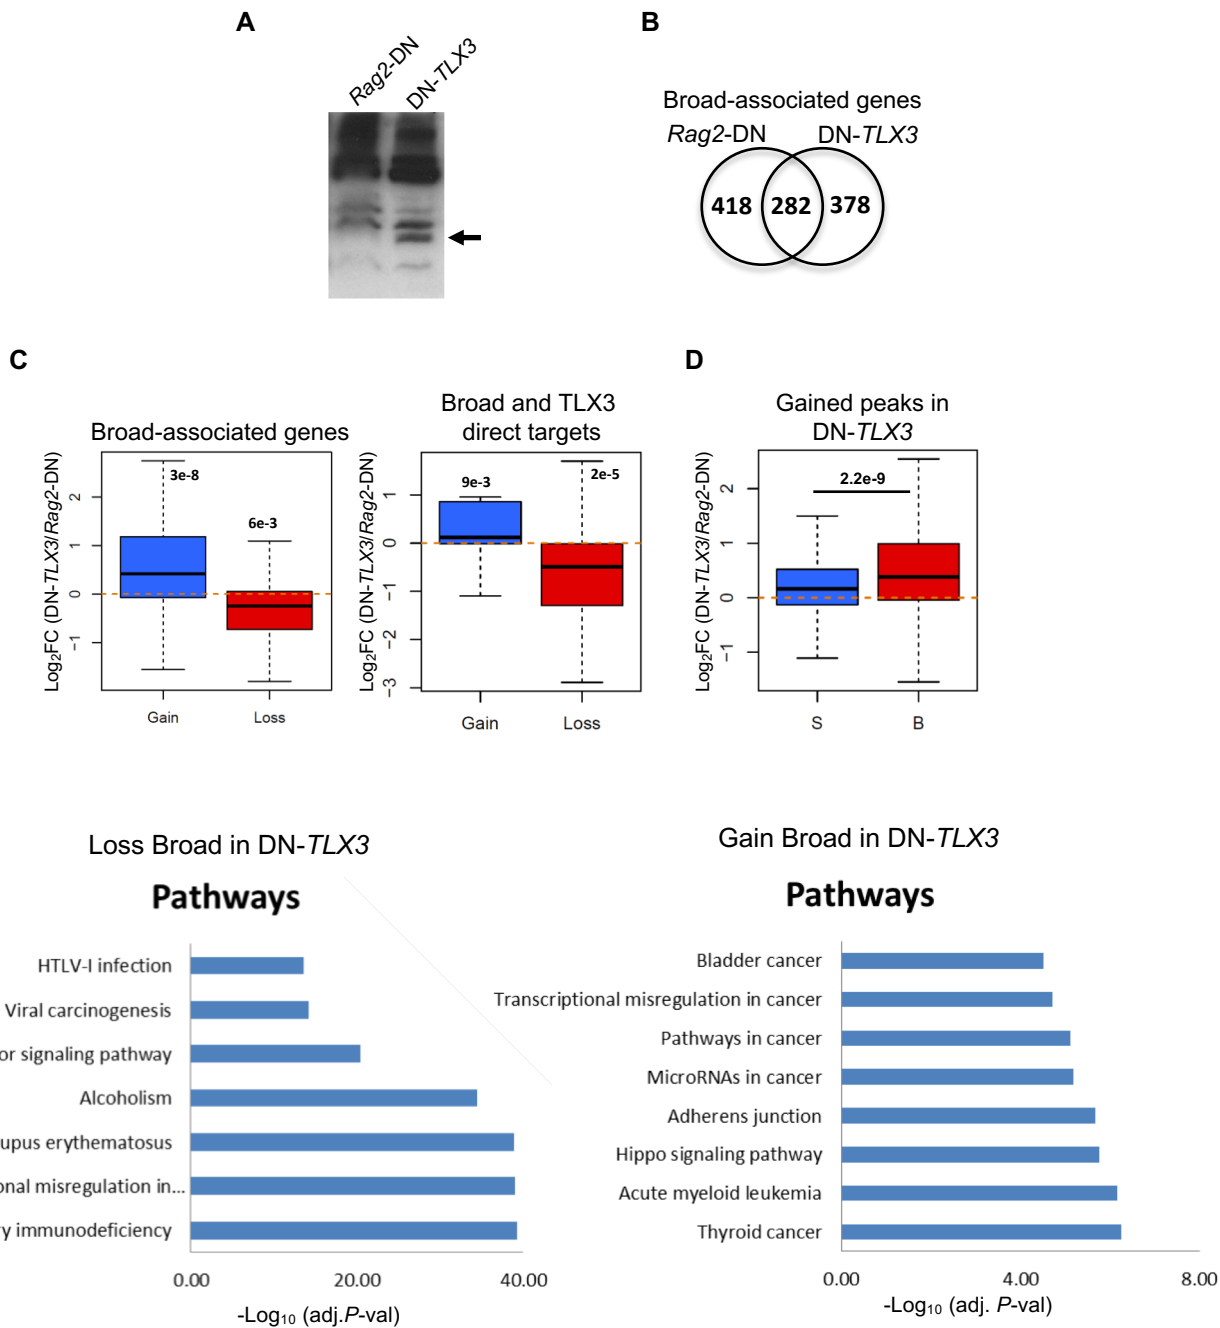

**Supplemental Figure S10: Dynamics of broad H3K4me3 domains in a mouse model of T-ALL using *Rag2*<sup>-/-</sup> thymocytes as control.** A) Western blot using an antibody against TLX3. The arrow indicates the expected size of the TLX3 protein. B) Overlap between the Broad H3K4me2 domains found in DN thymocytes from *Rag2*<sup>-/-</sup> mice (*Rag2*-DN) and *TLX3*<sup>+</sup> leukemic cells (*DN-TLX3*). B) Boxplot showing the fold change of expression of Broad H3K4me3 domain associated genes only in *DN-TLX3* (gain) or *Rag2*-DN (loss) (left panel). Right panel: only the direct targets of TLX3 were analyzed. D) Two sets of equally expressed genes associated with broad (B) or sharp (S) H3K4me3 peaks in *DN-TLX3* cells were defined. The fold change of the expression between *DN-TLX3* and *Rag2*-DN was determined. E) GO-terms enrichment of genes associated with Broad H3K4me3 domain only in *DN-TLX3* (gain) or *Rag2*-DN (loss). The inverted log<sub>10</sub> of the Benjamin-corrected *P* value is shown. Significance in C and D was assessed by a Wilcoxon test.
