# Supplementary material for: Dynamics of broad H3K4me3 domains uncover an epigenetic switch between cell identity and cancer-related genes
Source: HighWire-hosted journal article supplement (doi:10.1101/gr.266924.120), 2021-06-23
Supplement: Supplemental_Fig_S12.pdf [file Supplemental_Fig_S12.pdf]

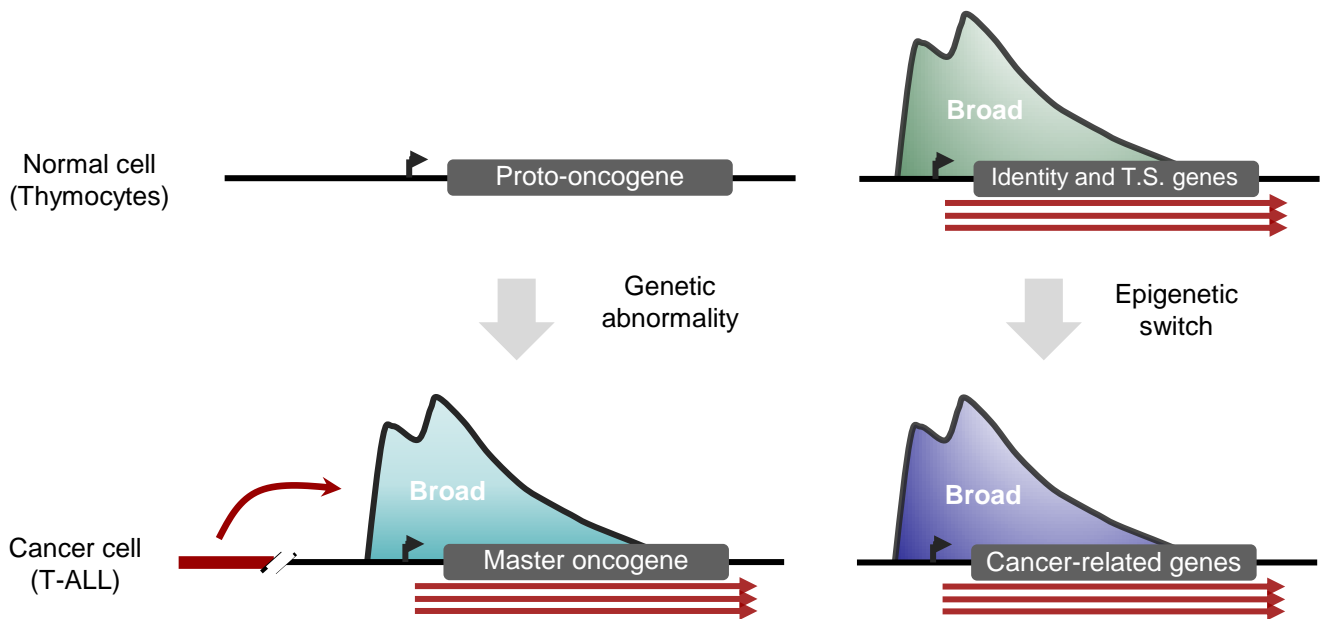

**Supplemental Figure S12: Models of Broad H3K4me3 domain-based epigenetic switch between normal (thymocytes) and leukemic cells. T.S., tumor suppressor**
