# Supplementary material for: Dynamics of broad H3K4me3 domains uncover an epigenetic switch between cell identity and cancer-related genes
Source: HighWire-hosted journal article supplement (doi:10.1101/gr.266924.120), 2021-06-23
Supplement: Supplemental_Figure_S6_.pdf [file Supplemental_Figure_S6_.pdf]

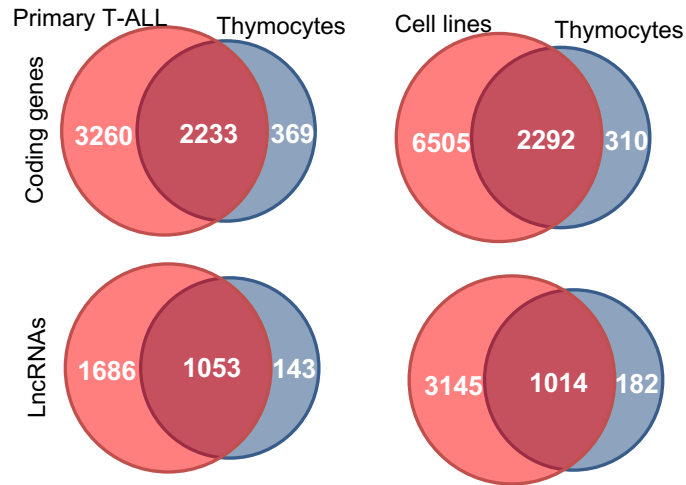

**Supplemental Figure S6: Overlap between the broad H3K4me3 domain-associated genes in T-ALL samples and thymocytes.** The number of specific or shared coding genes and LncRNAs are indicated for the comparison between thymocytes and either primary T-ALLs or cell lines.
