# Supplementary material for: Dynamics of broad H3K4me3 domains uncover an epigenetic switch between cell identity and cancer-related genes
Source: HighWire-hosted journal article supplement (doi:10.1101/gr.266924.120), 2021-06-23
Supplement: Supplemental_Table_S1.docx [file Supplemental_Table_S1.docx]

**Supplemental Table S1:** List of sequenced samples and data resources

| **Sample** | **Source or reference** | **Link** | **Accession number** |
| --- | --- | --- | --- |
| ChIP-seq H3K4me3 human thymus | Roadmap  (Kundaje et al. 2015)(Kundaje et al., 2015) | https://www.ncbi.nlm.nih.gov/geo/ | GSM1220289 |
| ChIP-seq H3K4me3 T-ALL 864 | Blueprint | http://dcc.blueprint-epigenome.eu | S01PSEH1 |
| ChIP-seq H3K4me3 T-ALL 885 | Blueprint | http://dcc.blueprint-epigenome.eu | S01PTCH1 |
| ChIP-seq H3K4me3 T-ALL 845 | Blueprint | http://dcc.blueprint-epigenome.eu | S01PV8H1 |
| ChIP-seq H3K4me3 T-ALL 820 | Blueprint | http://dcc.blueprint-epigenome.eu | T10C T-ALL |
| ChIP-seq H3K4me3 T-ALL 802 | Blueprint | http://dcc.blueprint-epigenome.eu | S01S1JH1 |
| ChIP-seq H3K4me3 T-ALL 760 | Blueprint | http://dcc.blueprint-epigenome.eu | T12C T-ALL |
| ChIP-seq H3K4me3 T-ALL 790 | **This study** | https://www.ncbi.nlm.nih.gov/geo/ | GSE151297 |
| ChIP-seq H3K4me3 T-ALL 764 | **This study** | https://www.ncbi.nlm.nih.gov/geo/ | GSE151297 |
| ChIP-seq H3K4me3 T-ALL 427 | **This study** | https://www.ncbi.nlm.nih.gov/geo/ | GSE151297 |
| ChIP-seq H3K36me3 T-ALL 864 | Blueprint | http://dcc.blueprint-epigenome.eu | S01PSEH1 |
| ChIP-seq H3K36me3 T-ALL 885 | Blueprint | http://dcc.blueprint-epigenome.eu | S01PTCH1 |
| ChIP-seq H3K36me3 T-ALL 845 | Blueprint | http://dcc.blueprint-epigenome.eu | S01PV8H1 |
| ChIP-seq H3K36me3 T-ALL 820 | Blueprint | http://dcc.blueprint-epigenome.eu | T10C T-ALL |
| ChIP-seq H3K36me3 T-ALL 802 | Blueprint | http://dcc.blueprint-epigenome.eu | S01S1JH1 |
| ChIP-seq H3K36me3 T-ALL 760 | Blueprint | http://dcc.blueprint-epigenome.eu | T12C T-ALL |
| ChIP-seq H3K4me3 RPMI-8402 | **This study** | https://www.ncbi.nlm.nih.gov/geo/ | GSE151297 |
| ChIP-seq H3K4me3 SIL-ALL | **This study** | https://www.ncbi.nlm.nih.gov/geo/ | GSE151297 |
| ChIP-seq H3K4me3 CCRF-CEM | **This study** | https://www.ncbi.nlm.nih.gov/geo/ | GSE151297 |
| ChIP-seq H3K4me3 Jurkat | **This study** | https://www.ncbi.nlm.nih.gov/geo/ | GSE151297 |
| ChIP-seq H3K4me3 Loucy | **This study** | https://www.ncbi.nlm.nih.gov/geo/ | GSE151297 |
| ChIP-seq H3K4me3 CUTLL1 | (Wang et al. 2011)(Wang et al., 2011) | https://www.ncbi.nlm.nih.gov/geo/ | [GSM732911](https://www.ncbi.nlm.nih.gov/geo/query/acc.cgi?acc=GSM732911) |
| ChIP-seq H3K4me3 DND41 | ENCODE  (Bernstein et al. 2012)(Bernstein et al., 2012) | https://www.encodeproject.org | ENCSR000ARA |
| ChIP-seq H3K4me3 Jurkat treated with OICR-9429 or DMSO | **This study** | https://www.ncbi.nlm.nih.gov/geo/ | GSE164184 |
| ChIP-seq H3K4me3 Jurkat treated with PBIT or DMSO | **This study** | https://www.ncbi.nlm.nih.gov/geo/ | GSE164184 |
| RNA-seq Jurkat treated with PBIT or DMSO | **This study** | https://www.ncbi.nlm.nih.gov/geo/ | GSE164185 |
| ChIP-seq H3K4me3 Jurkat treated with EPZ5676 or DMSO | (Orlando et al. 2014) | https://www.ncbi.nlm.nih.gov/sra/ | SRR1536556  SRR1536572  SRR1536543  SRR1536552 |
| Microarray Jurkat treated with THZ1 or DMSO | (Kwiatkowski et al. 2014) | https://www.ncbi.nlm.nih.gov/geo/ | GSE50625 |
| ChIP-seq Pol2 Jurkat | (Zhang et al. 2016) | https://www.ncbi.nlm.nih.gov/sra/ | SRR2157609 |
| ChIP-seq CDK7 Jurkat | (Kwiatkowski et al. 2014) | https://www.ncbi.nlm.nih.gov/sra/ | SRR1057275 |
| ChIP-seq H3K36me3 Jurkat | (Vansant et al. 2020) | https://www.ncbi.nlm.nih.gov/sra/ | SRR11783980 |
| ChIP-seq H3K79me2 Jurkat | (Orlando et al. 2014) | https://www.ncbi.nlm.nih.gov/sra/ | SRR1536561 |
| DNAse-seq Jurkat | (Thurman et al. 2012) | https://www.ncbi.nlm.nih.gov/sra/ | SRR231122 |
| RNA-seq normal thymocytes and 41 T-ALL series | (Cieslak et al. 2020)  (Bond et al. 2017)(Bond et al., 2017) | https://www.ncbi.nlm.nih.gov/geo/ | GSE142522 |
| RNA-seq T-ALL cell lines | (Atak et al. 2013)(Atak et al., 2013) | European Genome-phenome Archive | EGAS00001000536 |
| ChIP-seq H3K4me3 from mouse Rag2-/- thymocytes | (Pekowska et al. 2011)(Pekowska et al., 2011) | https://www.ncbi.nlm.nih.gov/geo/ | GSE55635 |
| ChIP-seq H3K4me3 from mouse DN thymocytes | (Oravecz et al. 2015) | https://www.ncbi.nlm.nih.gov/geo/ | GSM1872304 |
| ChIP-seq H3K4me3 and TLX3 from DN-TLX3 cells | **This study** | https://www.ncbi.nlm.nih.gov/geo/ | GSE164228 |
| Expression data from Rag2-/-thymocytes and DN-TLX3 cells | **This study** | https://www.ncbi.nlm.nih.gov/geo/ | GSE151670 |
| ChIP-seq H3K4me3 from thymus of wild-type and NUP214-ABL1/TLX1 transgenic mice | (Vanden Bempt et al. 2018) | https://www.ncbi.nlm.nih.gov/geo/ | GSM2730369  GSM1000101 |
| ChIP-seq H3K4me3 from thymus of wild-type mice | ENCODE  (Bernstein et al. 2012) | https://www.ncbi.nlm.nih.gov/geo/ | GSM1000101 |
| ChIP-seq TLX1 from thymus of NUP214-ABL1/TLX1 transgenic mice | (Vanden Bempt et al. 2018) | https://www.ncbi.nlm.nih.gov/geo/ | GSM2730368 |
| ChIP-seq STAT5 from thymus of NUP214-ABL1/TLX1 transgenic mice | (Vanden Bempt et al. 2018) | https://www.ncbi.nlm.nih.gov/geo/ | GSM2730367 |
| RNA-seq from thymus of wild-type and NUP214-ABL1/TLX1 transgenic mice | (Vanden Bempt et al. 2018) | https://www.ncbi.nlm.nih.gov/geo/ | GSM2730329  GSM2730330  GSM2730331  GSM2730339  GSM2730342  GSM2730343  GSM2730344  GSM2730346 |
| ChIP-seq H3K4me3 human thymocyte populations (EC, LC, SP4, SP8) | Blueprint  (Adams et al. 2012)  (Cieslak et al. 2020)(Cieslak et al., 2020) | http://dcc.blueprint-epigenome.eu  Direct track hub:  http://genome-euro.ucsc.edu/cgi-bin/hgTracks?hubUrl=https://raw.githubusercontent.com/guillaumecharbonnier/mw-cieslak2019/master/src/hub/hub.txt&genome=hg19 | |
| Chromatin states human thymocyte populations (EC, LC, SP4, SP8) | (Cieslak et al. 2020)(Cieslak et al., 2020) | Direct track hub:  http://genome-euro.ucsc.edu/cgi-bin/hgTracks?hubUrl=https://raw.githubusercontent.com/guillaumecharbonnier/mw-cieslak2019/master/src/hub/hub.txt&genome=hg19 | |
| ChIP-seq H3K4me3 human B cell populations and CLL | Blueprint | http://dcc.blueprint-epigenome.eu | |
| GitHub link for the code used in this mansucript | **This study** | <https://github.com/guillaumecharbonnier/mw-belhocine2021>  the source code is also available as Supplemental code S1 | |

**Supplemental References**

Adams D, Altucci L, Antonarakis SE, Ballesteros J, Beck S, Bird A, Bock C, Boehm B, Campo E, Caricasole A et al. 2012. BLUEPRINT to decode the epigenetic signature written in blood. *Nat Biotechnol* **30**: 224-226.

Atak ZK, Gianfelici V, Hulselmans G, De Keersmaecker K, Devasia AG, Geerdens E, Mentens N, Chiaretti S, Durinck K, Uyttebroeck A et al. 2013. Comprehensive analysis of transcriptome variation uncovers known and novel driver events in T-cell acute lymphoblastic leukemia. *PLoS genetics* **9**: e1003997.

Bernstein BE, Birney E, Dunham I, Green ED, Gunter C, Snyder M. 2012. An integrated encyclopedia of DNA elements in the human genome. *Nature* **489**: 57-74.

Bond J, Graux C, Lhermitte L, Lara D, Cluzeau T, Leguay T, Cieslak A, Trinquand A, Pastoret C, Belhocine M et al. 2017. Early Response-Based Therapy Stratification Improves Survival in Adult Early Thymic Precursor Acute Lymphoblastic Leukemia: A Group for Research on Adult Acute Lymphoblastic Leukemia Study. *Journal of clinical oncology : official journal of the American Society of Clinical Oncology* doi:10.1200/JCO.2016.71.8585: JCO2016718585.

Cieslak A, Charbonnier G, Tesio M, Mathieu EL, Belhocine M, Touzart A, Smith C, Hypolite G, Andrieu GP, Martens JHA et al. 2020. Blueprint of human thymopoiesis reveals molecular mechanisms of stage-specific TCR enhancer activation. *J Exp Med* **217**: (9): e20192360.

Kundaje A, Meuleman W, Ernst J, Bilenky M, Yen A, Heravi-Moussavi A, Kheradpour P, Zhang Z, Wang J, Ziller MJ et al. 2015. Integrative analysis of 111 reference human epigenomes. *Nature* **518**: 317-330.

Kwiatkowski N, Zhang T, Rahl PB, Abraham BJ, Reddy J, Ficarro SB, Dastur A, Amzallag A, Ramaswamy S, Tesar B et al. 2014. Targeting transcription regulation in cancer with a covalent CDK7 inhibitor. *Nature* **511**: 616-620.

Oravecz A, Apostolov A, Polak K, Jost B, Le Gras S, Chan S, Kastner P. 2015. Ikaros mediates gene silencing in T cells through Polycomb repressive complex 2. *Nat Commun* **6**: 8823.

Orlando DA, Chen MW, Brown VE, Solanki S, Choi YJ, Olson ER, Fritz CC, Bradner JE, Guenther MG. 2014. Quantitative ChIP-Seq normalization reveals global modulation of the epigenome. *Cell reports* **9**: 1163-1170.

Pekowska A, Benoukraf T, Zacarias-Cabeza J, Belhocine M, Koch F, Holota H, Imbert J, Andrau JC, Ferrier P, Spicuglia S. 2011. H3K4 tri-methylation provides an epigenetic signature of active enhancers. *The EMBO journal* **30**: 4198–4210.

Thurman RE, Rynes E, Humbert R, Vierstra J, Maurano MT, Haugen E, Sheffield NC, Stergachis AB, Wang H, Vernot B et al. 2012. The accessible chromatin landscape of the human genome. *Nature* **489**: 75-82.

Vanden Bempt M, Demeyer S, Broux M, De Bie J, Bornschein S, Mentens N, Vandepoel R, Geerdens E, Radaelli E, Bornhauser BC et al. 2018. Cooperative Enhancer Activation by TLX1 and STAT5 Drives Development of NUP214-ABL1/TLX1-Positive T Cell Acute Lymphoblastic Leukemia. *Cancer cell* **34**: 271-285 e277.

Vansant G, Chen HC, Zorita E, Trejbalova K, Miklik D, Filion G, Debyser Z. 2020. The chromatin landscape at the HIV-1 provirus integration site determines viral expression. *Nucleic acids research* **48**: 7801-7817.

Wang H, Zou J, Zhao B, Johannsen E, Ashworth T, Wong H, Pear WS, Schug J, Blacklow SC, Arnett KL et al. 2011. Genome-wide analysis reveals conserved and divergent features of Notch1/RBPJ binding in human and murine T-lymphoblastic leukemia cells. *Proc Natl Acad Sci U S A* **108**: 14908-14913.

Zhang T, Kwiatkowski N, Olson CM, Dixon-Clarke SE, Abraham BJ, Greifenberg AK, Ficarro SB, Elkins JM, Liang Y, Hannett NM et al. 2016. Covalent targeting of remote cysteine residues to develop CDK12 and CDK13 inhibitors. *Nature chemical biology* **12**: 876-884.
