# Supplementary material for: Dynamics of broad H3K4me3 domains uncover an epigenetic switch between cell identity and cancer-related genes
Source: HighWire-hosted journal article supplement (doi:10.1101/gr.266924.120), 2021-06-23
Supplement: Supplemental_Table_S2.docx [file Supplemental_Table_S2.docx]

**Table S2:** Number of broad H3K4me3 domains per sample

| Sample | Total number of H3K4me3 Peaks | Threshold Broad (bp) | # Broad (coding genes) | # Broad (LncRNAs) | % Broad |
| --- | --- | --- | --- | --- | --- |
| EC | 17684 | 3692 | 1460 | 729 | 12,4 |
| LC | 19900 | 4038 | 1405 | 672 | 10,4 |
| CD4 | 23371 | 4071 | 1762 | 750 | 10,7 |
| CD8 | 23067 | 4183 | 1624 | 747 | 10,3 |
| UPNT-427 | 18352 | 4500 | 507 | 359 | 4,7 |
| UPNT-864 | 21766 | 4099 | 3572 | 1840 | 24,9 |
| UPNT-885 | 26105 | 4144 | 2133 | 1002 | 12,0 |
| UPNT-845 | 33645 | 4068 | 3623 | 1760 | 16,0 |
| UPNT-820 | 22084 | 4149 | 1746 | 896 | 12,0 |
| UPNT-802 | 31535 | 4204 | 2538 | 1065 | 11,4 |
| UPNT-760 | 21198 | 3983 | 1639 | 801 | 11,5 |
| UPNT-790 | 25961 | 4785 | 1717 | 860 | 9,9 |
| UPNT-764 | 13282 | 3010 | 187 | 98 | 2,1 |
| Jurkat | 60859 | 4133 | 1427 | 706 | 3,5 |
| DND41 | 27566 | 6313 | 4142 | 2200 | 23,0 |
| Loucy | 34010 | 5148 | 7490 | 3085 | 31,1 |
| CUTLL1 | 26018 | 4700 | 1605 | 883 | 9,6 |
| Sil-ALL | 20218 | 5170 | 2136 | 1133 | 16,2 |
| CEM-CCRF | 33481 | 4800 | 2881 | 1445 | 12,9 |
| RPMI-8402 | 25095 | 4619 | 2014 | 1058 | 12,2 |
| Average | **26259** | **4390** | **2280** | **1104** | **12,8** |
