# Supplementary material for: Dynamics of broad H3K4me3 domains uncover an epigenetic switch between cell identity and cancer-related genes
Source: HighWire-hosted journal article supplement (doi:10.1101/gr.266924.120), 2021-06-23
Supplement: Supplemental_Table_S3.xlsx [file Supplemental_Table_S3.xlsx]

## Sheet: Broad H3K4me3 domains
Table S3: Summary of genes associated with broad H3k4me3 domains
Chr_Tx	Start_Tx	End_Tx	Strand_Tx	ID_Tx	gene_name	type_Tx	EC	LC	CD4	CD8	UPNT-427	UPNT-864	UPNT-885	UPNT-845	UPNT-820	UPNT-802	UPNT-760	UPNT-790	UPNT-764	DND41	Jurkat	Loucy	CUTLL1	RPMI-8402	CEM-CCRF	Sil-ALL
chr12	9267058	9268558	-	NM_000014	A2M	coding gene	Non	Non	Non	Non	Non	Non	Non	Non	Non	Non	Non	Non	Non	Non	Non	Non	Non	Non	Non	Non
chr8	18248754	18250254	+	NM_000015	NAT2	coding gene	Non	Non	Non	Non	Non	Non	Non	Non	Non	Non	Non	Non	Non	Non	Non	Non	Non	Non	Non	Non
chr1	76190042	76191542	+	NM_000016	ACADM	coding gene	Sharp	Sharp	Sharp	Sharp	Sharp	Broad	Broad	Intermediate	Broad	Broad	Broad	Broad	Sharp	Intermediate	Intermediate	Broad	Sharp	Broad	Intermediate	Intermediate
chr12	121163570	121165070	+	NM_000017	ACADS	coding gene	Sharp	Sharp	Sharp	Sharp	Sharp	Sharp	Sharp	Sharp	Sharp	Sharp	Sharp	Sharp	Sharp	Sharp	Sharp	Sharp	Sharp	Sharp	Sharp	Sharp
chr17	7123152	7124652	+	NM_000018	ACADVL	coding gene	Sharp	Sharp	Broad	Sharp	Sharp	Sharp	Sharp	Sharp	Sharp	Sharp	Sharp	Sharp	Sharp	Broad	Sharp	Broad	Sharp	Broad	Broad	Sharp
chr11	107992257	107993757	+	NM_000019	ACAT1	coding gene	Sharp	Sharp	Sharp	Sharp	Sharp	Sharp	Sharp	Sharp	Sharp	Sharp	Sharp	Sharp	Sharp	Sharp	Sharp	Sharp	Sharp	Sharp	Sharp	Intermediate
chr12	52301201	52302701	+	NM_000020	ACVRL1	coding gene	Non	Non	Non	Non	Non	Non	Non	Non	Non	Sharp	Non	Non	Non	Non	Non	Non	Non	Non	Non	Non
chr14	73603142	73604642	+	NM_000021	PSEN1	coding gene	Sharp	Sharp	Sharp	Sharp	Sharp	Sharp	Sharp	Sharp	Sharp	Sharp	Sharp	Sharp	Sharp	Sharp	Sharp	Sharp	Sharp	Sharp	Sharp	Sharp
chr20	43278876	43280376	-	NM_000022	ADA	coding gene	Broad	Broad	Intermediate	Intermediate	Broad	Broad	Broad	Broad	Broad	Broad	Broad	Broad	Sharp	Broad	Broad	Broad	Broad	Broad	Broad	Broad
chr17	48243365	48244865	+	NM_000023	SGCA	coding gene	Non	Non	Non	Non	Non	Non	Non	Non	Non	Non	Non	Non	Non	Non	Non	Non	Non	Non	Non	Non
chr5	148206155	148207655	+	NM_000024	ADRB2	coding gene	Sharp	Sharp	Sharp	Sharp	Non	Non	Intermediate	Broad	Intermediate	Intermediate	Sharp	Sharp	Non	Non	Sharp	Non	Non	Sharp	Non	Non
chr8	37822684	37824184	-	NM_000025	ADRB3	coding gene	Non	Non	Non	Non	Non	Non	Sharp	Non	Non	Non	Non	Non	Non	Non	Non	Non	Non	Non	Non	Non
chr22	40742503	40744003	+	NM_000026	ADSL	coding gene	Sharp	Sharp	Intermediate	Intermediate	Sharp	Intermediate	Sharp	Intermediate	Intermediate	Intermediate	Sharp	Sharp	Sharp	Sharp	Intermediate	Intermadiate	Intermediate	Sharp	Intermediate	Intermediate
chr4	178362157	178363657	-	NM_000027	AGA	coding gene	Sharp	Sharp	Sharp	Sharp	Sharp	Intermediate	Intermediate	Intermediate	Intermediate	Intermediate	Intermediate	Sharp	Sharp	Sharp	Sharp	Sharp	Sharp	Intermediate	Intermediate	Sharp
chr1	100316044	100317544	+	NM_000028	AGL	coding gene	Sharp	Sharp	Sharp	Sharp	Sharp	Sharp	Sharp	Intermediate	Sharp	Sharp	Sharp	Sharp	Sharp	Sharp	Sharp	Intermadiate	Sharp	Sharp	Intermediate	Sharp
chr1	230848836	230850336	-	NM_000029	AGT	coding gene	Non	Non	Non	Non	Non	Non	Non	Non	Non	Non	Non	Non	Non	Non	Non	Non	Non	Non	Non	Non
chr2	241808161	241809661	+	NM_000030	AGXT	coding gene	Non	Non	Non	Non	Non	Non	Non	Non	Non	Non	Non	Non	Non	Non	Non	Non	Non	Non	Non	Non
chr9	116162118	116163618	-	NM_000031	ALAD	coding gene	Sharp	Sharp	Sharp	Sharp	Sharp	Sharp	Sharp	Sharp	Sharp	Sharp	Sharp	Sharp	Sharp	Sharp	Sharp	Sharp	Sharp	Sharp	Sharp	Sharp
chrX	55055997	55057497	-	NM_000032	ALAS2	coding gene	Non	Non	Non	Non	Non	Non	Non	Non	Non	Non	Non	Non	Non	Non	Non	Non	Non	Non	Non	Non
chrX	152990322	152991822	+	NM_000033	ABCD1	coding gene	Intermediate	Broad	Broad	Broad	Sharp	Intermediate	Intermediate	Intermediate	Sharp	Intermediate	Intermediate	Sharp	Non	Sharp	Intermediate	Broad	Broad	Sharp	Broad	Sharp
chr16	30064410	30065910	+	NM_000034	None	coding gene	Intermediate	Sharp	Sharp	Sharp	Sharp	Intermediate	Sharp	Sharp	Sharp	Sharp	Sharp	Sharp	Sharp	Intermediate	Sharp	Intermadiate	Sharp	Sharp	Sharp	Sharp
chr9	104196562	104198062	-	NM_000035	ALDOB	coding gene	Non	Non	Non	Non	Non	Non	Non	Non	Non	Non	Non	Non	Non	Non	Non	Non	Non	Non	Non	Non
chr1	115236739	115238239	-	NM_000036	AMPD1	coding gene	Non	Non	Non	Non	Non	Non	Non	Non	Non	Non	Non	Non	Non	Non	Non	Non	Non	Non	Non	Non
chr8	41653640	41655140	-	NM_000037	ANK1	coding gene	Non	Non	Non	Non	Non	Non	Non	Non	Non	Intermediate	Non	Non	Non	Non	Non	Non	Non	Non	Non	Non
chr5	112073555	112075055	+	NM_000038	APC	coding gene	Sharp	Sharp	Sharp	Sharp	Non	Sharp	Sharp	Sharp	Sharp	Sharp	Sharp	Sharp	Sharp	Sharp	Non	Sharp	Sharp	Sharp	Sharp	Sharp
chr11	116706838	116708338	-	NM_000039	APOA1	coding gene	Sharp	Sharp	Sharp	Sharp	Non	Sharp	Sharp	Sharp	Sharp	Sharp	Sharp	Sharp	Non	Sharp	Sharp	Sharp	Sharp	Sharp	Sharp	Sharp
chr11	116700623	116702123	+	NM_000040	APOC3	coding gene	Non	Non	Non	Non	Non	Non	Non	Non	Non	Non	Non	Non	Non	Non	Non	Non	Non	Non	Non	Non
chr19	45409038	45410538	+	NM_000041	APOE	coding gene	Non	Non	Non	Non	Non	Non	Non	Non	Non	Non	Non	Non	Non	Non	Non	Non	Non	Non	Non	Non
chr17	64224056	64225556	-	NM_000042	APOH	coding gene	Non	Non	Non	Non	Non	Non	Non	Non	Non	Non	Non	Non	Non	Non	Non	Non	Non	Non	Non	Non
chr10	90750287	90751787	+	NM_000043	FAS	coding gene	Sharp	Sharp	Sharp	Sharp	Sharp	Sharp	Sharp	Intermediate	Intermediate	Sharp	Sharp	Sharp	Sharp	Sharp	Sharp	Intermadiate	Sharp	Sharp	Intermediate	Sharp
chrX	66763873	66765373	+	NM_000044	AR	coding gene	Intermediate	Intermediate	Intermediate	Intermediate	Non	Non	Sharp	Non	Non	Intermediate	Sharp	Sharp	Non	Non	Non	Non	Non	Broad	Non	Non
chr6	131894343	131895843	+	NM_000045	ARG1	coding gene	Non	Non	Non	Non	Non	Non	Sharp	Non	Sharp	Sharp	Non	Non	Non	Non	Non	Non	Non	Non	Non	Non
chr5	78280857	78282357	-	NM_000046	ARSB	coding gene	Sharp	Sharp	Sharp	Sharp	Sharp	Intermediate	Sharp	Intermediate	Sharp	Sharp	Sharp	Sharp	Sharp	Sharp	Sharp	Sharp	Sharp	Sharp	Intermediate	Sharp
chrX	2880994	2882494	-	NM_000047	ARSL	coding gene	Non	Non	Non	Non	Non	Non	Non	Non	Non	Non	Non	Non	Non	Non	Non	Non	Non	Non	Non	Non
chr7	65540775	65542275	+	NM_000048	ASL	coding gene	Sharp	Sharp	Sharp	Sharp	Sharp	Sharp	Sharp	Sharp	Sharp	Sharp	Sharp	Sharp	Sharp	Sharp	Sharp	Sharp	Sharp	Sharp	Sharp	Sharp
chr17	3379295	3380795	+	NM_000049	ASPA	coding gene	Non	Non	Non	Non	Sharp	Sharp	Non	Sharp	Sharp	Sharp	Sharp	Sharp	Non	Non	Non	Sharp	Non	Non	Sharp	Non
chr9	133320093	133321593	+	NM_000050	ASS1	coding gene	Non	Sharp	Sharp	Sharp	Non	Non	Sharp	Non	Sharp	Sharp	Sharp	Sharp	Non	Non	Sharp	Non	Non	Sharp	Intermediate	Non
chr11	108093558	108095058	+	NM_000051	ATM	coding gene	Intermediate	Broad	Broad	Broad	Intermediate	Broad	Broad	Broad	Broad	Broad	Broad	Broad	Sharp	Broad	Broad	Broad	Broad	Broad	Broad	Broad
chrX	77166193	77167693	+	NM_000052	ATP7A	coding gene	Sharp	Sharp	Sharp	Sharp	Sharp	Intermediate	Sharp	Intermediate	Sharp	Intermediate	Sharp	Intermediate	Sharp	Intermediate	Sharp	Sharp	Sharp	Sharp	Intermediate	Sharp
chr13	52584130	52585630	-	NM_000053	ATP7B	coding gene	Sharp	Sharp	Sharp	Sharp	Sharp	Intermediate	Sharp	Sharp	Sharp	Sharp	Sharp	Intermediate	Sharp	Intermediate	Intermediate	Intermadiate	Sharp	Sharp	Intermediate	Intermediate
chrX	153170528	153172028	+	NM_000054	AVPR2	coding gene	Non	Non	Non	Non	Non	Non	Non	Non	Non	Non	Non	Non	Non	Non	Non	Non	Non	Non	Non	Non
chr3	165553753	165555253	-	NM_000055	BCHE	coding gene	Non	Non	Non	Non	Non	Non	Sharp	Broad	Non	Non	Non	Non	Non	Intermediate	Sharp	Sharp	Sharp	Non	Broad	Sharp
chr6	80816343	80817843	+	NM_000056	BCKDHB	coding gene	Sharp	Sharp	Sharp	Sharp	Sharp	Sharp	Sharp	Sharp	Sharp	Sharp	Sharp	Sharp	Sharp	Sharp	Sharp	Sharp	Sharp	Sharp	Sharp	Sharp
chr15	91260578	91262078	+	NM_000057	BLM	coding gene	Sharp	Sharp	Sharp	Sharp	Sharp	Intermediate	Sharp	Intermediate	Sharp	Sharp	Intermediate	Sharp	Sharp	Intermediate	Intermediate	Intermadiate	Sharp	Intermediate	Intermediate	Intermediate
chr13	32889616	32891116	+	NM_000059	BRCA2	coding gene	Sharp	Sharp	Sharp	Sharp	Sharp	Sharp	Sharp	Intermediate	Sharp	Sharp	Sharp	Sharp	Sharp	Intermediate	Sharp	Sharp	Sharp	Sharp	Intermediate	Sharp
chr3	15643254	15644754	+	NM_000060	None	coding gene	Sharp	Sharp	Sharp	Sharp	Sharp	Sharp	Sharp	Intermediate	Sharp	Sharp	Sharp	Sharp	Sharp	Sharp	Intermediate	Sharp	Sharp	Sharp	Intermediate	Sharp
chrX	100639712	100641212	-	NM_000061	BTK	coding gene	Non	Non	Non	Non	Non	Non	Sharp	Intermediate	Sharp	Sharp	Non	Non	Non	Non	Non	Non	Non	Non	Non	Non
chr11	57365026	57366526	+	NM_000062	SERPING1	coding gene	Non	Non	Sharp	Non	Sharp	Non	Non	Non	Non	Sharp	Non	Non	Non	Non	Non	Non	Non	Non	Non	Non
chr6	31895265	31896765	+	NM_000063_6	None	coding gene	Non	Non	Non	Non	Non	Non	Non	Non	Non	Non	Non	Non	Non	Non	Non	Non	Non	Non	Non	Non
chr19	6719162	6720662	-	NM_000064	C3	coding gene	Non	Non	Non	Non	Non	Non	Non	Non	Non	Non	Non	Non	Non	Non	Non	Non	Non	Non	Non	Non
chr5	41212167	41213667	-	NM_000065	C6	coding gene	Non	Non	Non	Non	Non	Non	Non	Non	Non	Non	Non	Non	Non	Non	Non	Non	Non	Non	Non	Non
chr1	57430188	57431688	-	NM_000066	C8B	coding gene	Non	Non	Non	Non	Non	Non	Non	Non	Non	Non	Non	Non	Non	Non	Non	Non	Non	Non	Non	Non
chr8	86376130	86377630	+	NM_000067	CA2	coding gene	Sharp	Sharp	Sharp	Sharp	Sharp	Non	Sharp	Sharp	Sharp	Intermediate	Sharp	Sharp	Sharp	Non	Non	Non	Non	Sharp	Sharp	Non
chr19	13615774	13617274	-	NM_000068	CACNA1A	coding gene	Non	Non	Sharp	Sharp	Non	Non	Sharp	Non	Sharp	Sharp	Sharp	Sharp	Non	Non	Non	Non	Non	Non	Non	Non
chr1	201080194	201081694	-	NM_000069	CACNA1S	coding gene	Non	Non	Non	Non	Non	Non	Non	Non	Non	Non	Non	Non	Non	Non	Non	Non	Non	Non	Non	Non
chr15	42651697	42653197	+	NM_000070	CAPN3	coding gene	Non	Non	Non	Non	Non	Non	Non	Non	Non	Non	Non	Non	Non	Non	Non	Non	Non	Non	Non	Non
chr21	44494540	44496040	-	NM_000071	CBS	coding gene	Sharp	Sharp	Sharp	Sharp	Non	Sharp	Sharp	Non	Sharp	Sharp	Sharp	Sharp	Sharp	Non	Sharp	Non	Sharp	Sharp	Sharp	Non
chr7	80267831	80269331	+	NM_000072	CD36	coding gene	Non	Non	Non	Non	Non	Non	Non	Non	Non	Non	Non	Non	Non	Non	Non	Non	Non	Non	Non	Non
chr11	118215058	118216558	+	NM_000073	CD3G	coding gene	Broad	Broad	Broad	Broad	Sharp	Broad	Broad	Broad	Broad	Broad	Broad	Broad	Non	Broad	Broad	Broad	Broad	Broad	Broad	Broad
chrX	135730335	135731835	+	NM_000074	CD40LG	coding gene	Non	Sharp	Broad	Non	Non	Non	Intermediate	Non	Non	Broad	Intermediate	Broad	Non	Non	Sharp	Non	Non	Broad	Non	Non
chr12	58144730	58146230	-	NM_000075	CDK4	coding gene	Sharp	Sharp	Sharp	Sharp	Sharp	Sharp	Sharp	Sharp	Sharp	Sharp	Sharp	Sharp	Non	Broad	Sharp	Sharp	Sharp	Sharp	Intermediate	Sharp
chr11	2905495	2906995	-	NM_000076	CDKN1C	coding gene	Intermediate	Intermediate	Intermediate	Intermediate	Non	Non	Sharp	Sharp	Sharp	Sharp	Sharp	Intermediate	Non	Non	Sharp	Non	Sharp	Sharp	Sharp	Non
chr9	21973632	21975132	-	NM_000077	CDKN2A	coding gene	Sharp	Sharp	Sharp	Sharp	Sharp	Non	Non	Non	Non	Sharp	Non	Non	Non	Broad	Non	Non	Intermediate	Non	Non	Non
chr16	56995834	56997334	+	NM_000078	CETP	coding gene	Non	Non	Non	Non	Non	Non	Non	Non	Non	Non	Non	Non	Non	Non	Non	Non	Non	Non	Non	Non
chr2	175627700	175629200	-	NM_000079	CHRNA1	coding gene	Non	Non	Non	Non	Non	Non	Non	Non	Non	Non	Non	Non	Non	Non	Non	Non	Non	Non	Non	Non
chr17	4804869	4806369	-	NM_000080	CHRNE	coding gene	Non	Non	Non	Non	Non	Sharp	Sharp	Non	Non	Non	Non	Non	Non	Non	Non	Non	Sharp	Non	Sharp	Sharp
chr1	236028720	236030220	-	NM_000081	LYST	coding gene	Broad	Broad	Intermediate	Intermediate	Intermediate	Broad	Broad	Broad	Broad	Broad	Intermediate	Intermediate	Sharp	Sharp	Intermediate	Sharp	Sharp	Sharp	Intermediate	Sharp
chr5	60239405	60240905	-	NM_000082	ERCC8	coding gene	Sharp	Intermediate	Sharp	Sharp	Sharp	Intermediate	Sharp	Intermediate	Sharp	Sharp	Sharp	Sharp	Sharp	Intermediate	Intermediate	Sharp	Sharp	Sharp	Intermediate	Sharp
chr7	143013218	143014718	+	NM_000083	CLCN1	coding gene	Non	Non	Non	Non	Non	Non	Non	Non	Non	Non	Non	Non	Non	Non	Non	Non	Non	Non	Non	Non
chrX	49832214	49833714	+	NM_000084	CLCN5	coding gene	Non	Non	Non	Non	Non	Non	Non	Non	Non	Non	Non	Non	Non	Non	Non	Non	Non	Non	Non	Non
chr1	16370246	16371746	+	NM_000085	CLCNKB	coding gene	Non	Non	Non	Non	Non	Non	Non	Non	Non	Non	Non	Non	Non	Non	Non	Non	Non	Non	Non	Non
chr16	28501903	28503403	-	NM_000086	CLN3	coding gene	Sharp	Intermediate	Intermediate	Intermediate	Sharp	Broad	Broad	Broad	Broad	Sharp	Sharp	Intermediate	Sharp	Intermediate	Sharp	Broad	Intermediate	Intermediate	Intermediate	Intermediate
chr4	48013461	48014961	-	NM_000087	CNGA1	coding gene	Non	Non	Non	Non	Non	Non	Non	Non	Non	Non	Non	Non	Non	Non	Non	Non	Non	Non	Non	Non
chr17	48277500	48279000	-	NM_000088	COL1A1	coding gene	Sharp	Sharp	Sharp	Sharp	Sharp	Sharp	Sharp	Sharp	Sharp	Sharp	Sharp	Sharp	Non	Sharp	Sharp	Sharp	Sharp	Sharp	Sharp	Sharp
chr7	94023872	94025372	+	NM_000089	COL1A2	coding gene	Sharp	Sharp	Sharp	Sharp	Non	Non	Sharp	Non	Sharp	Non	Sharp	Non	Non	Non	Non	Non	Non	Non	Non	Non
chr2	189839098	189840598	+	NM_000090	COL3A1	coding gene	Non	Non	Non	Non	Non	Non	Non	Non	Non	Non	Non	Non	Non	Non	Non	Non	Non	Non	Non	Non
chr2	228029280	228030780	+	NM_000091	COL4A3	coding gene	Non	Sharp	Sharp	Sharp	Non	Non	Sharp	Non	Sharp	Sharp	Sharp	Sharp	Sharp	Non	Sharp	Non	Sharp	Non	Sharp	Non
chr2	228027775	228029275	-	NM_000092	COL4A4	coding gene	Non	Sharp	Sharp	Sharp	Non	Non	Sharp	Non	Sharp	Sharp	Sharp	Sharp	Sharp	Non	Sharp	Non	Sharp	Non	Sharp	Non
chr9	137533651	137535151	+	NM_000093	COL5A1	coding gene	Sharp	Sharp	Sharp	Sharp	Sharp	Sharp	Sharp	Sharp	Sharp	Sharp	Sharp	Sharp	Sharp	Sharp	Sharp	Intermadiate	Non	Sharp	Sharp	Non
chr3	48631093	48632593	-	NM_000094	COL7A1	coding gene	Non	Non	Non	Non	Non	Non	Non	Non	Non	Non	Non	Non	Non	Non	Non	Non	Non	Non	Non	Non
chr19	18900614	18902114	-	NM_000095	COMP	coding gene	Non	Non	Sharp	Non	Non	Non	Non	Non	Non	Sharp	Non	Sharp	Non	Non	Non	Non	Non	Non	Non	Non
chr3	148938332	148939832	-	NM_000096	CP	coding gene	Non	Non	Non	Non	Non	Non	Non	Non	Non	Non	Non	Non	Non	Non	Non	Non	Non	Non	Non	Non
chr3	98310955	98312455	-	NM_000097	CPOX	coding gene	Sharp	Sharp	Sharp	Sharp	Sharp	Sharp	Sharp	Sharp	Sharp	Intermediate	Sharp	Sharp	Sharp	Sharp	Sharp	Sharp	Sharp	Sharp	Intermediate	Sharp
chr1	53662100	53663600	+	NM_000098	CPT2	coding gene	Sharp	Sharp	Sharp	Sharp	Sharp	Sharp	Sharp	Sharp	Intermediate	Sharp	Sharp	Sharp	Sharp	Sharp	Sharp	Sharp	Sharp	Sharp	Sharp	Sharp
chr20	23617074	23618574	-	NM_000099	CST3	coding gene	Sharp	Sharp	Sharp	Sharp	Sharp	Sharp	Sharp	Sharp	Sharp	Sharp	Sharp	Sharp	Sharp	Non	Sharp	Sharp	Non	Sharp	Sharp	Non
chr21	45194756	45196256	-	NM_000100	CSTB	coding gene	Sharp	Sharp	Sharp	Sharp	Sharp	Sharp	Sharp	Sharp	Sharp	Sharp	Sharp	Intermediate	Sharp	Sharp	Sharp	Broad	Sharp	Sharp	Broad	Sharp
chr16	88715992	88717492	-	NM_000101	CYBA	coding gene	Sharp	Sharp	Sharp	Sharp	Sharp	Sharp	Sharp	Intermediate	Sharp	Sharp	Sharp	Sharp	Sharp	Sharp	Sharp	Sharp	Sharp	Sharp	Sharp	Sharp
chr10	104595790	104597290	-	NM_000102	CYP17A1	coding gene	Non	Non	Non	Non	Non	Non	Non	Non	Non	Non	Non	Non	Non	Non	Non	Non	Non	Non	Non	Non
chr15	51629295	51630795	-	NM_000103	CYP19A1	coding gene	Non	Non	Non	Non	Non	Non	Non	Non	Non	Non	Non	Non	Non	Non	Non	Non	Non	Non	Non	Non
chr2	38301823	38303323	-	NM_000104	CYP1B1	coding gene	Non	Non	Non	Non	Non	Non	Intermediate	Non	Sharp	Intermediate	Non	Sharp	Non	Non	Sharp	Non	Non	Sharp	Non	Non
chr22	42525383	42526883	-	NM_000106	CYP2D6	coding gene	Non	Non	Non	Non	Non	Non	Non	Non	Non	Non	Non	Non	Non	Non	Non	Non	Non	Non	Non	Non
chr11	47236492	47237992	+	NM_000107	DDB2	coding gene	Intermediate	Sharp	Sharp	Sharp	Sharp	Intermediate	Intermediate	Intermediate	Sharp	Sharp	Sharp	Intermediate	Sharp	Sharp	Sharp	Broad	Intermediate	Sharp	Intermediate	Intermediate
chr7	107531585	107533085	+	NM_000108	DLD	coding gene	Sharp	Sharp	Sharp	Sharp	Sharp	Intermediate	Sharp	Sharp	Sharp	Intermediate	Sharp	Sharp	Sharp	Broad	Sharp	Broad	Sharp	Sharp	Intermediate	Sharp
chrX	33356226	33357726	-	NM_000109	DMD	coding gene	Non	Non	Non	Non	Non	Non	Non	Non	Non	Non	Non	Non	Non	Non	Non	Non	Non	Non	Non	Non
chr1	98385115	98386615	-	NM_000110	DPYD	coding gene	Intermediate	Sharp	Sharp	Sharp	Intermediate	Broad	Broad	Broad	Intermediate	Broad	Broad	Broad	Sharp	Broad	Intermediate	Broad	Intermediate	Broad	Intermediate	Broad
chr7	107442178	107443678	-	NM_000111	SLC26A3	coding gene	Non	Non	Non	Non	Non	Non	Non	Non	Non	Non	Non	Non	Non	Non	Non	Non	Non	Non	Non	Non
chr5	149340299	149341799	+	NM_000112	SLC26A2	coding gene	Sharp	Sharp	Sharp	Sharp	Sharp	Sharp	Sharp	Sharp	Sharp	Sharp	Sharp	Sharp	Sharp	Sharp	Sharp	Sharp	Sharp	Sharp	Sharp	Sharp
chr9	132584941	132586441	-	NM_000113	TOR1A	coding gene	Sharp	Sharp	Sharp	Sharp	Sharp	Sharp	Sharp	Sharp	Sharp	Sharp	Sharp	Sharp	Sharp	Sharp	Sharp	Sharp	Sharp	Sharp	Sharp	Sharp
chr20	57875498	57876998	+	NM_000114	None	coding gene	Non	Non	Non	Non	Non	Non	Sharp	Non	Non	Non	Non	Sharp	Non	Non	Non	Non	Non	Non	Non	Non
chr13	78548164	78549664	-	NM_000115	EDNRB	coding gene	Non	Non	Non	Non	Non	Non	Non	Non	Non	Non	Non	Non	Non	Non	Non	Non	Non	Non	Non	Non
chrX	153639876	153641376	+	NM_000116	TAZ	coding gene	Sharp	Sharp	Sharp	Sharp	Sharp	Sharp	Sharp	Broad	Sharp	Sharp	Sharp	Sharp	Sharp	Sharp	Sharp	Sharp	Sharp	Sharp	Sharp	Sharp
chrX	153607596	153609096	+	NM_000117	EMD	coding gene	Sharp	Sharp	Sharp	Sharp	Sharp	Sharp	Sharp	Sharp	Sharp	Sharp	Sharp	Sharp	Sharp	Intermediate	Sharp	Sharp	Sharp	Sharp	Intermediate	Sharp
chr9	130615547	130617047	-	NM_000118	ENG	coding gene	Sharp	Sharp	Sharp	Sharp	Non	Non	Sharp	Intermediate	Sharp	Sharp	Sharp	Sharp	Non	Non	Non	Non	Non	Sharp	Non	Non
chr15	43511823	43513323	-	NM_000119	EPB42	coding gene	Non	Non	Non	Non	Non	Non	Non	Non	Non	Sharp	Non	Non	Non	Non	Non	Non	Non	Non	Non	Non
chr1	226013001	226014501	+	NM_000120	EPHX1	coding gene	Non	Non	Non	Non	Non	Non	Non	Non	Non	Non	Non	Non	Non	Non	Non	Non	Non	Non	Non	Non
chr19	11493518	11495018	-	NM_000121	EPOR	coding gene	Non	Non	Non	Sharp	Non	Sharp	Intermediate	Sharp	Sharp	Sharp	Non	Sharp	Non	Non	Sharp	Sharp	Non	Intermediate	Intermediate	Non
chr2	128050252	128051752	-	NM_000122	ERCC3	coding gene	Sharp	Sharp	Sharp	Sharp	Sharp	Sharp	Sharp	Sharp	Sharp	Sharp	Sharp	Sharp	Sharp	Sharp	Sharp	Sharp	Sharp	Sharp	Sharp	Sharp
chr13	103498190	103499690	+	NM_000123	ERCC5	coding gene	Intermediate	Intermediate	Sharp	Sharp	Sharp	Intermediate	Intermediate	Intermediate	Intermediate	Intermediate	Intermediate	Intermediate	Sharp	Intermediate	Intermediate	Broad	Intermediate	Intermediate	Intermediate	Intermediate
chr10	50745647	50747147	-	NM_000124	ERCC6	coding gene	Sharp	Sharp	Sharp	Sharp	Sharp	Sharp	Sharp	Sharp	Sharp	Sharp	Sharp	Sharp	Sharp	Sharp	Sharp	Sharp	Sharp	Sharp	Sharp	Sharp
chr6	152128813	152130313	+	NM_000125	ESR1	coding gene	Non	Non	Sharp	Sharp	Non	Non	Sharp	Non	Sharp	Sharp	Non	Sharp	Sharp	Non	Non	Non	Non	Non	Non	Non
chr15	76602310	76603810	-	NM_000126	ETFA	coding gene	Sharp	Sharp	Sharp	Sharp	Sharp	Sharp	Sharp	Sharp	Sharp	Sharp	Sharp	Sharp	Sharp	Sharp	Sharp	Broad	Sharp	Sharp	Intermediate	Sharp
chr8	119122558	119124058	-	NM_000127	EXT1	coding gene	Broad	Intermediate	Intermediate	Intermediate	Intermediate	Broad	Intermediate	Intermediate	Broad	Intermediate	Sharp	Intermediate	Sharp	Broad	Sharp	Broad	Intermediate	Intermediate	Broad	Intermediate
chr4	187187117	187188617	+	NM_000128	F11	coding gene	Non	Non	Non	Non	Non	Non	Non	Non	Non	Non	Non	Non	Non	Non	Non	Non	Non	Non	Non	Non
chr6	6319424	6320924	-	NM_000129	F13A1	coding gene	Non	Non	Non	Non	Non	Non	Sharp	Broad	Sharp	Sharp	Non	Sharp	Non	Non	Non	Non	Non	Non	Sharp	Non
chr1	169554269	169555769	-	NM_000130	F5	coding gene	Non	Non	Non	Non	Sharp	Sharp	Sharp	Sharp	Sharp	Sharp	Non	Non	Non	Sharp	Sharp	Non	Non	Non	Non	Sharp
chr13	113760104	113761604	+	NM_000131	F7	coding gene	Non	Non	Non	Non	Non	Non	Non	Non	Non	Non	Non	Non	Non	Non	Non	Non	Non	Non	Non	Non
chrX	154249498	154250998	-	NM_000132	F8	coding gene	Non	Non	Non	Non	Non	Non	Non	Non	Non	Sharp	Non	Non	Non	Non	Non	Sharp	Non	Sharp	Sharp	Non
chrX	138612894	138614394	+	NM_000133	F9	coding gene	Non	Non	Non	Non	Non	Non	Non	Non	Non	Non	Non	Non	Non	Non	Non	Non	Non	Non	Non	Non
chr4	120241816	120243316	-	NM_000134	FABP2	coding gene	Non	Non	Non	Non	Non	Non	Non	Non	Non	Non	Non	Non	Non	Non	Non	Non	Non	Non	Non	Non
chr16	89881565	89883065	-	NM_000135	FANCA	coding gene	Sharp	Sharp	Sharp	Sharp	Sharp	Intermediate	Sharp	Sharp	Sharp	Sharp	Sharp	Sharp	Sharp	Intermediate	Intermediate	Intermadiate	Sharp	Intermediate	Broad	Intermediate
chr9	98078491	98079991	-	NM_000136	FANCC	coding gene	Sharp	Sharp	Sharp	Sharp	Sharp	Intermediate	Sharp	Sharp	Sharp	Sharp	Sharp	Sharp	Sharp	Sharp	Sharp	Intermadiate	Intermediate	Sharp	Intermediate	Intermediate
chr15	80445232	80446732	+	NM_000137	FAH	coding gene	Sharp	Sharp	Sharp	Sharp	Sharp	Sharp	Sharp	Sharp	Sharp	Sharp	Sharp	Intermediate	Sharp	Sharp	Sharp	Sharp	Sharp	Sharp	Intermediate	Sharp
chr15	48936485	48937985	-	NM_000138	FBN1	coding gene	Sharp	Sharp	Sharp	Sharp	Sharp	Sharp	Sharp	Sharp	Sharp	Sharp	Sharp	Sharp	Sharp	Sharp	Sharp	Sharp	Sharp	Sharp	Sharp	Sharp
chr11	59856136	59857636	+	NM_000139	MS4A2	coding gene	Non	Non	Non	Non	Non	Non	Non	Non	Non	Non	Non	Non	Non	Non	Non	Non	Non	Non	Non	Non
chr18	55252469	55253969	-	NM_000140	FECH	coding gene	Sharp	Sharp	Sharp	Sharp	Sharp	Sharp	Sharp	Sharp	Sharp	Sharp	Sharp	Sharp	Sharp	Sharp	Sharp	Sharp	Sharp	Sharp	Sharp	Sharp
chr10	123356472	123357972	-	NM_000141	FGFR2	coding gene	Non	Non	Sharp	Sharp	Non	Non	Sharp	Non	Non	Sharp	Sharp	Non	Non	Non	Non	Non	Non	Sharp	Non	Non
chr4	1795038	1796538	+	NM_000142	FGFR3	coding gene	Intermediate	Sharp	Intermediate	Sharp	Non	Non	Sharp	Non	Sharp	Sharp	Sharp	Intermediate	Sharp	Sharp	Sharp	Sharp	Sharp	Sharp	Sharp	Sharp
chr1	241681585	241683085	-	NM_000143	FH	coding gene	Sharp	Sharp	Sharp	Sharp	Sharp	Broad	Sharp	Intermediate	Sharp	Sharp	Sharp	Sharp	Sharp	Sharp	Intermediate	Sharp	Sharp	Sharp	Intermediate	Sharp
chr9	71650478	71651978	+	NM_000144	FXN	coding gene	Sharp	Sharp	Sharp	Sharp	Sharp	Sharp	Sharp	Sharp	Sharp	Sharp	Sharp	Sharp	Sharp	Sharp	Sharp	Sharp	Sharp	Sharp	Sharp	Sharp
chr2	49380166	49381666	-	NM_000145	FSHR	coding gene	Non	Non	Non	Non	Non	Non	Non	Non	Non	Non	Non	Non	Non	Non	Non	Non	Non	Non	Non	Non
chr19	49468565	49470065	+	NM_000146	FTL	coding gene	Intermediate	Intermediate	Intermediate	Broad	Sharp	Sharp	Broad	Broad	Broad	Broad	Intermediate	Intermediate	Sharp	Sharp	Sharp	Intermadiate	Broad	Intermediate	Broad	Intermediate
chr1	24193359	24194859	-	NM_000147	FUCA1	coding gene	Sharp	Sharp	Sharp	Sharp	Sharp	Sharp	Sharp	Sharp	Sharp	Sharp	Sharp	Sharp	Sharp	Sharp	Sharp	Sharp	Sharp	Sharp	Sharp	Non
chr19	49257147	49258647	-	NM_000148	FUT1	coding gene	Non	Non	Non	Non	Non	Non	Non	Non	Non	Non	Non	Non	Non	Non	Non	Non	Non	Non	Non	Non
chr19	5849985	5851485	-	NM_000149	FUT3	coding gene	Non	Non	Non	Non	Non	Non	Non	Non	Non	Non	Non	Non	Non	Non	Non	Non	Non	Non	Non	Non
chr19	5838242	5839742	-	NM_000150	FUT6	coding gene	Non	Non	Non	Non	Non	Non	Non	Non	Non	Non	Non	Non	Non	Non	Non	Non	Non	Non	Non	Non
chr17	41052814	41054314	+	NM_000151	G6PC	coding gene	Non	Non	Non	Non	Non	Non	Non	Non	Non	Non	Non	Non	Non	Non	Non	Non	Non	Non	Non	Non
chr17	78075354	78076854	+	NM_000152	GAA	coding gene	Sharp	Sharp	Sharp	Sharp	Sharp	Sharp	Sharp	Sharp	Sharp	Sharp	Sharp	Sharp	Sharp	Sharp	Intermediate	Sharp	Intermediate	Sharp	Sharp	Sharp
chr14	88458115	88459615	-	NM_000153	GALC	coding gene	Sharp	Sharp	Sharp	Sharp	Sharp	Sharp	Sharp	Sharp	Sharp	Sharp	Sharp	Sharp	Sharp	Non	Non	Broad	Sharp	Non	Sharp	Non
chr17	73759780	73761280	-	NM_000154	GALK1	coding gene	Sharp	Sharp	Sharp	Sharp	Sharp	Sharp	Sharp	Sharp	Sharp	Sharp	Sharp	Sharp	Sharp	Sharp	Sharp	Sharp	Sharp	Sharp	Sharp	Sharp
chr9	34646634	34648134	+	NM_000155	GALT	coding gene	Sharp	Sharp	Sharp	Sharp	Sharp	Sharp	Sharp	Sharp	Sharp	Sharp	Sharp	Sharp	Sharp	Sharp	Sharp	Sharp	Sharp	Sharp	Sharp	Sharp
chr19	1400069	1401569	-	NM_000156	GAMT	coding gene	Sharp	Sharp	Sharp	Sharp	Sharp	Sharp	Sharp	Sharp	Sharp	Sharp	Sharp	Sharp	Sharp	Sharp	Sharp	Sharp	Sharp	Sharp	Intermediate	Intermediate
chr1	155209569	155211069	-	NM_000157	GBA	coding gene	Sharp	Sharp	Sharp	Sharp	Sharp	Sharp	Sharp	Sharp	Sharp	Sharp	Sharp	Sharp	Non	Broad	Sharp	Intermadiate	Broad	Sharp	Sharp	Sharp
chr3	81809450	81810950	-	NM_000158	GBE1	coding gene	Sharp	Sharp	Sharp	Sharp	Sharp	Intermediate	Sharp	Intermediate	Sharp	Sharp	Sharp	Sharp	Sharp	Broad	Sharp	Broad	Sharp	Sharp	Intermediate	Sharp
chr19	13001973	13003473	+	NM_000159	GCDH	coding gene	Sharp	Sharp	Sharp	Sharp	Sharp	Sharp	Sharp	Sharp	Sharp	Sharp	Sharp	Sharp	Sharp	Sharp	Sharp	Sharp	Sharp	Sharp	Sharp	Sharp
chr17	79762009	79763509	+	NM_000160	GCGR	coding gene	Non	Non	Non	Sharp	Non	Non	Non	Non	Non	Sharp	Non	Sharp	Non	Non	Non	Non	Non	Non	Non	Non
chr14	55368042	55369542	-	NM_000161	GCH1	coding gene	Sharp	Sharp	Intermediate	Intermediate	Sharp	Intermediate	Sharp	Intermediate	Sharp	Sharp	Sharp	Sharp	Sharp	Sharp	Intermediate	Sharp	Sharp	Intermediate	Intermediate	Sharp
chr7	44227522	44229022	-	NM_000162	GCK	coding gene	Non	Non	Non	Non	Non	Non	Non	Non	Non	Non	Non	Non	Non	Non	Non	Non	Non	Non	Non	Non
chr5	42423876	42425376	+	NM_000163	GHR	coding gene	Non	Non	Non	Non	Non	Non	Sharp	Non	Non	Sharp	Non	Sharp	Non	Non	Non	Non	Non	Sharp	Non	Non
chr19	46171501	46173001	+	NM_000164	GIPR	coding gene	Non	Sharp	Sharp	Sharp	Sharp	Sharp	Sharp	Sharp	Sharp	Sharp	Sharp	Sharp	Non	Sharp	Sharp	Sharp	Sharp	Sharp	Sharp	Sharp
chr6	121756744	121758244	+	NM_000165	GJA1	coding gene	Non	Non	Non	Non	Non	Non	Sharp	Non	Sharp	Sharp	Non	Sharp	Non	Non	Sharp	Non	Non	Sharp	Non	Non
chrX	70443055	70444555	+	NM_000166	GJB1	coding gene	Non	Non	Non	Non	Non	Non	Non	Non	Non	Non	Non	Non	Non	Non	Non	Non	Non	Non	Non	Non
chrX	30671475	30672975	+	NM_000167	GK	coding gene	Sharp	Sharp	Sharp	Sharp	Sharp	Sharp	Sharp	Intermediate	Sharp	Sharp	Sharp	Sharp	Sharp	Sharp	Sharp	Sharp	Sharp	Sharp	Sharp	Sharp
chr7	42275118	42276618	-	NM_000168	GLI3	coding gene	Sharp	Sharp	Sharp	Sharp	Non	Sharp	Sharp	Sharp	Sharp	Sharp	Sharp	Sharp	Sharp	Intermediate	Intermediate	Non	Sharp	Sharp	Intermediate	Sharp
chrX	100661501	100663001	-	NM_000169	GLA	coding gene	Intermediate	Sharp	Sharp	Intermediate	Sharp	Broad	Broad	Broad	Intermediate	Sharp	Intermediate	Intermediate	Sharp	Intermediate	Intermediate	Intermadiate	Sharp	Intermediate	Intermediate	Intermediate
chr9	6644192	6645692	-	NM_000170	GLDC	coding gene	Sharp	Sharp	Sharp	Sharp	Non	Non	Sharp	Non	Sharp	Sharp	Sharp	Sharp	Non	Non	Sharp	Non	Sharp	Sharp	Non	Non
chr5	151302897	151304397	-	NM_000171	GLRA1	coding gene	Non	Non	Non	Non	Non	Non	Non	Non	Non	Non	Non	Non	Non	Non	Non	Non	Non	Non	Non	Non
chr3	50229042	50230542	+	NM_000172	GNAT1	coding gene	Non	Non	Non	Non	Non	Non	Non	Non	Non	Non	Non	Non	Non	Non	Non	Non	Non	Non	Non	Non
chr17	4835591	4837091	+	NM_000173	GP1BA	coding gene	Non	Non	Non	Non	Non	Non	Non	Non	Non	Non	Non	Non	Non	Non	Non	Sharp	Non	Non	Non	Non
chr3	128779644	128781144	+	NM_000174	GP9	coding gene	Non	Non	Non	Non	Non	Non	Non	Non	Non	Non	Non	Non	Non	Non	Non	Non	Non	Non	Non	Non
chr19	34856031	34857531	+	NM_000175	GPI	coding gene	Sharp	Sharp	Sharp	Sharp	Sharp	Sharp	Sharp	Sharp	Sharp	Sharp	Sharp	Sharp	Sharp	Sharp	Intermediate	Broad	Sharp	Sharp	Broad	Sharp
chr5	142781754	142783254	-	NM_000176	NR3C1	coding gene	Broad	Broad	Broad	Broad	Intermediate	Broad	Broad	Broad	Broad	Broad	Broad	Broad	Broad	Broad	Intermediate	Broad	Intermediate	Intermediate	Broad	Broad
chr9	124062078	124063578	+	NM_000177	GSN	coding gene	Sharp	Sharp	Sharp	Sharp	Non	Sharp	Sharp	Non	Sharp	Sharp	Sharp	Sharp	Sharp	Non	Sharp	Non	Non	Non	Non	Non
chr20	33542101	33543601	-	NM_000178	GSS	coding gene	Sharp	Sharp	Sharp	Sharp	Sharp	Sharp	Sharp	Sharp	Sharp	Sharp	Sharp	Sharp	Sharp	Sharp	Sharp	Sharp	Sharp	Sharp	Sharp	Sharp
chr2	48010220	48011720	+	NM_000179	MSH6	coding gene	Intermediate	Sharp	Sharp	Sharp	Sharp	Broad	Intermediate	Broad	Sharp	Sharp	Sharp	Sharp	Sharp	Broad	Sharp	Broad	Intermediate	Intermediate	Intermediate	Intermediate
chr17	7905987	7907487	+	NM_000180	GUCY2D	coding gene	Non	Non	Non	Non	Sharp	Non	Non	Sharp	Non	Non	Non	Non	Non	Non	Non	Non	Non	Non	Non	Non
chr7	65445801	65447301	-	NM_000181	GUSB	coding gene	Sharp	Sharp	Sharp	Sharp	Sharp	Sharp	Sharp	Sharp	Sharp	Sharp	Sharp	Sharp	Sharp	Sharp	Intermediate	Sharp	Sharp	Sharp	Intermediate	Sharp
chr2	26466094	26467594	-	NM_000182	HADHA	coding gene	Intermediate	Intermediate	Intermediate	Intermediate	Sharp	Broad	Intermediate	Broad	Intermediate	Intermediate	Intermediate	Intermediate	Sharp	Broad	Intermediate	Broad	Intermediate	Intermediate	Broad	Intermediate
chr2	26467615	26469115	+	NM_000183	HADHB	coding gene	Intermediate	Intermediate	Intermediate	Intermediate	Sharp	Broad	Intermediate	Broad	Intermediate	Intermediate	Intermediate	Intermediate	Sharp	Broad	Intermediate	Broad	Intermediate	Intermediate	Broad	Intermediate
chr11	5274511	5276011	-	NM_000184	HBG2	coding gene	Non	Non	Non	Non	Non	Non	Non	Non	Non	Non	Non	Non	Non	Non	Non	Non	Non	Non	Non	Non
chr22	21128382	21129882	+	NM_000185	SERPIND1	coding gene	Non	Non	Non	Non	Non	Non	Non	Non	Non	Non	Non	Non	Non	Non	Non	Non	Non	Non	Non	Non
chr1	196621007	196622507	+	NM_000186	CFH	coding gene	Non	Non	Non	Non	Sharp	Non	Non	Sharp	Non	Sharp	Non	Non	Non	Broad	Non	Sharp	Sharp	Sharp	Sharp	Sharp
chr3	120399918	120401418	-	NM_000187	HGD	coding gene	Non	Non	Non	Non	Non	Non	Non	Non	Non	Non	Non	Non	Non	Non	Non	Non	Non	Non	Non	Non
chr10	71078602	71080102	+	NM_000188	HK1	coding gene	Sharp	Sharp	Intermediate	Sharp	Sharp	Sharp	Sharp	Sharp	Sharp	Intermediate	Sharp	Intermediate	Sharp	Intermediate	Sharp	Intermadiate	Intermediate	Intermediate	Intermediate	Sharp
chr2	75059781	75061281	+	NM_000189	HK2	coding gene	Sharp	Sharp	Intermediate	Intermediate	Sharp	Sharp	Intermediate	Intermediate	Intermediate	Sharp	Sharp	Intermediate	Non	Broad	Sharp	Broad	Intermediate	Sharp	Broad	Sharp
chr11	118955586	118957086	+	NM_000190	HMBS	coding gene	Sharp	Sharp	Sharp	Sharp	Sharp	Sharp	Sharp	Sharp	Sharp	Broad	Sharp	Intermediate	Sharp	Sharp	Sharp	Broad	Sharp	Sharp	Broad	Sharp
chr1	24150449	24151949	-	NM_000191	HMGCL	coding gene	Sharp	Sharp	Sharp	Sharp	Sharp	Sharp	Sharp	Sharp	Sharp	Sharp	Sharp	Sharp	Sharp	Sharp	Sharp	Sharp	Sharp	Sharp	Sharp	Sharp
chr12	114844747	114846247	-	NM_000192	TBX5	coding gene	Non	Non	Non	Non	Non	Non	Non	Non	Non	Non	Non	Non	Non	Non	Non	Non	Non	Non	Non	Non
chr7	155603467	155604967	-	NM_000193	SHH	coding gene	Non	Non	Sharp	Non	Non	Non	Non	Non	Non	Non	Non	Non	Non	Non	Non	Non	Non	Non	Non	Non
chrX	133594174	133595674	+	NM_000194	HPRT1	coding gene	Sharp	Sharp	Sharp	Sharp	Sharp	Sharp	Sharp	Sharp	Sharp	Sharp	Sharp	Sharp	Sharp	Intermediate	Sharp	Intermadiate	Sharp	Sharp	Intermediate	Sharp
chr10	100205204	100206704	-	NM_000195	HPS1	coding gene	Sharp	Sharp	Sharp	Sharp	Sharp	Sharp	Sharp	Sharp	Sharp	Sharp	Sharp	Sharp	Sharp	Sharp	Sharp	Sharp	Sharp	Sharp	Sharp	Sharp
chr16	67465035	67466535	+	NM_000196	HSD11B2	coding gene	Sharp	Sharp	Sharp	Sharp	Non	Non	Sharp	Non	Sharp	Sharp	Sharp	Sharp	Sharp	Non	Sharp	Non	Non	Sharp	Sharp	Non
chr9	99062934	99064434	-	NM_000197	HSD17B3	coding gene	Non	Non	Non	Non	Non	Non	Non	Non	Non	Non	Non	Non	Non	Non	Non	Non	Non	Non	Non	Non
chr1	119957742	119959242	+	NM_000198	HSD3B2	coding gene	Non	Non	Non	Non	Non	Non	Non	Non	Non	Non	Non	Non	Non	Non	Non	Non	Non	Non	Non	Non
chr17	78192699	78194199	-	NM_000199	SGSH	coding gene	Sharp	Sharp	Sharp	Sharp	Sharp	Sharp	Sharp	Sharp	Sharp	Sharp	Sharp	Sharp	Non	Non	Sharp	Non	Sharp	Non	Sharp	Non
chr4	70894129	70895629	+	NM_000200	HTN3	coding gene	Non	Non	Non	Non	Non	Non	Non	Non	Non	Non	Non	Non	Non	Non	Non	Non	Non	Non	Non	Non
chr19	10381516	10383016	+	NM_000201	ICAM1	coding gene	Sharp	Sharp	Sharp	Sharp	Sharp	Sharp	Sharp	Intermediate	Sharp	Sharp	Sharp	Sharp	Non	Sharp	Sharp	Sharp	Sharp	Sharp	Sharp	Sharp
chrX	148585384	148586884	-	NM_000202	IDS	coding gene	Sharp	Sharp	Sharp	Sharp	Sharp	Sharp	Sharp	Sharp	Sharp	Sharp	Sharp	Intermediate	Sharp	Sharp	Sharp	Sharp	Sharp	Sharp	Intermediate	Sharp
chr4	980784	982284	+	NM_000203	IDUA	coding gene	Sharp	Sharp	Sharp	Sharp	Sharp	Sharp	Sharp	Sharp	Sharp	Sharp	Sharp	Intermediate	Sharp	Sharp	Sharp	Intermadiate	Sharp	Sharp	Intermediate	Sharp
chr4	110721835	110723335	-	NM_000204	CFI	coding gene	Non	Non	Non	Non	Non	Non	Non	Sharp	Non	Non	Non	Non	Non	Non	Non	Non	Non	Non	Non	Non
chrX	70329981	70331481	-	NM_000206	IL2RG	coding gene	Broad	Broad	Broad	Broad	Intermediate	Broad	Broad	Broad	Broad	Broad	Broad	Broad	Sharp	Broad	Broad	Broad	Broad	Broad	Broad	Broad
chr11	2180939	2182439	-	NM_000207	INS	coding gene	Non	Non	Non	Non	Non	Non	Non	Non	Non	Non	Non	Non	Non	Non	Non	Non	Non	Non	Non	Non
chr19	7292511	7294011	-	NM_000208	INSR	coding gene	Sharp	Sharp	Sharp	Sharp	Sharp	Sharp	Sharp	Sharp	Sharp	Sharp	Sharp	Sharp	Sharp	Sharp	Sharp	Sharp	Sharp	Sharp	Intermediate	Sharp
chr13	28494167	28495667	+	NM_000209	PDX1	coding gene	Non	Non	Sharp	Sharp	Sharp	Sharp	Sharp	Sharp	Sharp	Sharp	Sharp	Sharp	Sharp	Sharp	Sharp	Sharp	Non	Sharp	Sharp	Non
chr2	173292313	173293813	+	NM_000210	ITGA6	coding gene	Intermediate	Sharp	Intermediate	Intermediate	Sharp	Intermediate	Sharp	Intermediate	Intermediate	Sharp	Sharp	Sharp	Sharp	Sharp	Sharp	Broad	Sharp	Broad	Intermediate	Sharp
chr21	46339465	46340965	-	NM_000211	ITGB2	coding gene	Sharp	Intermediate	Broad	Broad	Sharp	Sharp	Intermediate	Intermediate	Intermediate	Broad	Intermediate	Sharp	Sharp	Sharp	Sharp	Intermadiate	Sharp	Sharp	Intermediate	Intermediate
chr17	45331207	45332707	+	NM_000212	ITGB3	coding gene	Sharp	Sharp	Sharp	Sharp	Sharp	Sharp	Sharp	Sharp	Sharp	Sharp	Sharp	Sharp	Sharp	Sharp	Sharp	Sharp	Sharp	Sharp	Sharp	Sharp
chr17	73717515	73719015	+	NM_000213	ITGB4	coding gene	Sharp	Sharp	Sharp	Sharp	Sharp	Sharp	Sharp	Sharp	Sharp	Sharp	Sharp	Sharp	Non	Non	Sharp	Non	Sharp	Sharp	Sharp	Sharp
chr20	10653194	10654694	-	NM_000214	JAG1	coding gene	Sharp	Sharp	Intermediate	Intermediate	Non	Non	Intermediate	Intermediate	Intermediate	Intermediate	Sharp	Sharp	Sharp	Non	Sharp	Non	Non	Intermediate	Intermediate	Non
chr19	17957341	17958841	-	NM_000215	JAK3	coding gene	Sharp	Sharp	Intermediate	Intermediate	Sharp	Sharp	Sharp	Sharp	Sharp	Sharp	Sharp	Sharp	Non	Sharp	Sharp	Sharp	Sharp	Sharp	Sharp	Sharp
chrX	8698727	8700227	-	NM_000216	ANOS1	coding gene	Non	Non	Non	Non	Non	Non	Non	Non	Non	Sharp	Non	Non	Non	Non	Non	Non	Non	Non	Non	Non
chr12	5019072	5020572	+	NM_000217	KCNA1	coding gene	Non	Non	Sharp	Sharp	Non	Non	Sharp	Non	Sharp	Sharp	Sharp	Sharp	Non	Non	Non	Non	Non	Sharp	Non	Non
chr11	2466220	2467720	+	NM_000218	KCNQ1	coding gene	Non	Sharp	Intermediate	Intermediate	Non	Non	Sharp	Sharp	Sharp	Sharp	Sharp	Sharp	Non	Non	Non	Non	Non	Non	Non	Non
chr21	35882113	35883613	-	NM_000219	KCNE1	coding gene	Non	Non	Non	Non	Non	Non	Sharp	Non	Sharp	Sharp	Non	Non	Non	Non	Non	Non	Non	Non	Non	Non
chr11	128710863	128712363	-	NM_000220	KCNJ1	coding gene	Non	Non	Non	Non	Non	Non	Non	Non	Non	Non	Non	Non	Non	Non	Non	Non	Non	Non	Non	Non
chr2	27309610	27311110	+	NM_000221	KHK	coding gene	Sharp	Sharp	Sharp	Sharp	Sharp	Sharp	Sharp	Sharp	Sharp	Sharp	Sharp	Sharp	Non	Sharp	Sharp	Intermadiate	Sharp	Sharp	Sharp	Sharp
chr4	55524094	55525594	+	NM_000222	KIT	coding gene	Intermediate	Sharp	Sharp	Sharp	Non	Sharp	Intermediate	Non	Sharp	Sharp	Sharp	Intermediate	Sharp	Non	Sharp	Non	Non	Sharp	Sharp	Non
chr17	39021962	39023462	-	NM_000223	KRT12	coding gene	Non	Non	Non	Non	Non	Non	Non	Non	Non	Non	Non	Non	Non	Non	Non	Non	Non	Non	Non	Non
chr12	53342842	53344342	+	NM_000224	KRT18	coding gene	Sharp	Sharp	Sharp	Sharp	Non	Non	Sharp	Non	Sharp	Sharp	Sharp	Sharp	Sharp	Non	Non	Non	Non	Sharp	Non	Non
chr17	39726810	39728310	-	NM_000226	KRT9	coding gene	Non	Non	Non	Non	Non	Non	Non	Non	Non	Non	Non	Non	Non	Non	Non	Non	Non	Non	Non	Non
chr18	21452983	21454483	+	NM_000227	LAMA3	coding gene	Non	Non	Non	Non	Non	Non	Non	Non	Non	Non	Non	Non	Non	Non	Non	Non	Non	Non	Non	Non
chr1	209824320	209825820	-	NM_000228	LAMB3	coding gene	Non	Non	Non	Non	Non	Non	Non	Non	Non	Non	Non	Non	Non	Non	Non	Non	Non	Non	Non	Non
chr16	67976515	67978015	-	NM_000229	LCAT	coding gene	Non	Non	Non	Non	Non	Non	Non	Non	Non	Non	Non	Non	Non	Non	Non	Non	Non	Non	Non	Non
chr7	127881330	127882830	+	NM_000230	LEP	coding gene	Non	Non	Non	Non	Non	Non	Non	Non	Non	Non	Non	Non	Non	Non	Non	Non	Non	Non	Non	Non
chr13	23755059	23756559	+	NM_000231	SGCG	coding gene	Non	Non	Non	Non	Non	Non	Non	Non	Non	Non	Non	Non	Non	Non	Non	Non	Non	Non	Non	Non
chr4	52902985	52904485	-	NM_000232	SGCB	coding gene	Sharp	Sharp	Sharp	Sharp	Non	Sharp	Sharp	Sharp	Sharp	Sharp	Sharp	Sharp	Sharp	Sharp	Sharp	Sharp	Sharp	Sharp	Sharp	Sharp
chr2	48981380	48982880	-	NM_000233	LHCGR	coding gene	Non	Non	Non	Non	Non	Non	Non	Non	Non	Non	Non	Non	Non	Non	Non	Non	Non	Non	Non	Non
chr19	48672060	48673560	-	NM_000234	LIG1	coding gene	Sharp	Sharp	Sharp	Sharp	Sharp	Sharp	Sharp	Sharp	Sharp	Sharp	Sharp	Sharp	Sharp	Sharp	Sharp	Intermadiate	Sharp	Sharp	Intermediate	Sharp
chr10	91010160	91011660	-	NM_000235	LIPA	coding gene	Sharp	Sharp	Sharp	Sharp	Sharp	Sharp	Sharp	Sharp	Sharp	Sharp	Sharp	Sharp	Sharp	Sharp	Sharp	Sharp	Sharp	Sharp	Sharp	Sharp
chr15	58724174	58725674	+	NM_000236	LIPC	coding gene	Non	Non	Non	Non	Non	Non	Non	Non	Non	Non	Non	Non	Non	Non	Non	Non	Non	Non	Non	Non
chr8	19796581	19798081	+	NM_000237	LPL	coding gene	Non	Non	Sharp	Non	Non	Non	Sharp	Non	Sharp	Sharp	Non	Sharp	Non	Non	Non	Non	Non	Sharp	Non	Non
chr7	150673902	150675402	-	NM_000238	KCNH2	coding gene	Sharp	Sharp	Sharp	Sharp	Sharp	Sharp	Sharp	Sharp	Sharp	Sharp	Sharp	Sharp	Non	Broad	Sharp	Broad	Non	Sharp	Broad	Sharp
chr12	69742133	69743633	+	NM_000239	LYZ	coding gene	Non	Non	Non	Non	Sharp	Non	Sharp	Sharp	Sharp	Sharp	Non	Non	Non	Non	Non	Sharp	Non	Non	Non	Non
chrX	43515408	43516908	+	NM_000240	MAOA	coding gene	Non	Sharp	Sharp	Sharp	Non	Sharp	Sharp	Sharp	Non	Sharp	Non	Sharp	Non	Sharp	Non	Non	Non	Sharp	Non	Non
chr10	54529960	54531460	-	NM_000242	MBL2	coding gene	Non	Non	Non	Non	Non	Non	Non	Non	Non	Non	Non	Non	Non	Non	Non	Non	Non	Non	Non	Non
chr16	3305127	3306627	-	NM_000243	MEFV	coding gene	Non	Non	Non	Non	Sharp	Non	Sharp	Non	Sharp	Sharp	Non	Non	Non	Non	Non	Non	Non	Non	Non	Non
chr11	64576688	64578188	-	NM_000244	MEN1	coding gene	Sharp	Sharp	Sharp	Sharp	Sharp	Sharp	Sharp	Sharp	Sharp	Sharp	Sharp	Sharp	Sharp	Sharp	Sharp	Sharp	Sharp	Sharp	Sharp	Sharp
chr7	116312458	116313958	+	NM_000245	MET	coding gene	Non	Non	Sharp	Non	Non	Non	Non	Non	Non	Non	Non	Non	Non	Non	Non	Non	Non	Non	Non	Non
chr16	10971054	10972554	+	NM_000246	CIITA	coding gene	Sharp	Sharp	Sharp	Sharp	Non	Intermediate	Non	Broad	Sharp	Sharp	Non	Non	Non	Non	Non	Non	Non	Non	Non	Non
chr6	31371370	31372870	+	NM_000247_3	None	coding gene	Broad	Sharp	Sharp	Sharp	Sharp	Broad	Sharp	Sharp	Broad	Sharp	Broad	Sharp	Sharp	Broad	Sharp	Broad	Broad	Broad	Broad	Broad
chr3	69985750	69987250	+	NM_000248	MITF	coding gene	Non	Non	Non	Non	Non	Non	Non	Non	Non	Non	Non	Non	Non	Non	Non	Non	Non	Non	Non	Non
chr3	37034840	37036340	+	NM_000249	MLH1	coding gene	Intermediate	Sharp	Intermediate	Sharp	Sharp	Broad	Intermediate	Broad	Broad	Broad	Broad	Broad	Sharp	Broad	Intermediate	Broad	Broad	Broad	Broad	Broad
chr17	56356796	56358296	-	NM_000250	MPO	coding gene	Non	Non	Non	Non	Non	Non	Non	Broad	Non	Sharp	Non	Non	Non	Non	Non	Non	Non	Non	Non	Non
chr2	47630262	47631762	+	NM_000251	MSH2	coding gene	Intermediate	Sharp	Sharp	Sharp	Sharp	Intermediate	Intermediate	Sharp	Sharp	Sharp	Sharp	Sharp	Sharp	Intermediate	Sharp	Intermadiate	Sharp	Intermediate	Intermediate	Intermediate
chrX	149737046	149738546	+	NM_000252	MTM1	coding gene	Sharp	Sharp	Sharp	Sharp	Sharp	Sharp	Intermediate	Intermediate	Intermediate	Sharp	Intermediate	Sharp	Sharp	Intermediate	Sharp	Broad	Intermediate	Intermediate	Intermediate	Intermediate
chr4	100485239	100486739	+	NM_000253	MTTP	coding gene	Sharp	Sharp	Sharp	Sharp	Non	Intermediate	Sharp	Sharp	Sharp	Sharp	Sharp	Sharp	Non	Sharp	Sharp	Sharp	Sharp	Sharp	Sharp	Sharp
chr1	236958580	236960080	+	NM_000254	MTR	coding gene	Sharp	Sharp	Sharp	Sharp	Sharp	Sharp	Sharp	Intermediate	Sharp	Sharp	Sharp	Intermediate	Sharp	Intermediate	Sharp	Broad	Sharp	Sharp	Intermediate	Sharp
chr6	49429541	49431041	-	NM_000255	MMUT	coding gene	Intermediate	Sharp	Sharp	Sharp	Sharp	Intermediate	Sharp	Intermediate	Intermediate	Sharp	Sharp	Intermediate	Sharp	Broad	Intermediate	Broad	Sharp	Sharp	Intermediate	Intermediate
chr11	47372753	47374253	-	NM_000256	MYBPC3	coding gene	Non	Non	Non	Non	Non	Non	Non	Non	Non	Non	Non	Non	Non	Non	Non	Non	Non	Non	Non	Non
chr14	23903370	23904870	-	NM_000257	MYH7	coding gene	Non	Non	Non	Non	Non	Non	Non	Non	Non	Non	Non	Non	Non	Non	Non	Non	Non	Non	Non	Non
chr3	46903473	46904973	-	NM_000258	MYL3	coding gene	Non	Non	Non	Non	Non	Non	Non	Non	Non	Non	Non	Non	Non	Non	Non	Non	Non	Non	Non	Non
chr15	52819747	52821247	-	NM_000259	MYO5A	coding gene	Sharp	Sharp	Sharp	Sharp	Sharp	Sharp	Sharp	Intermediate	Sharp	Sharp	Sharp	Sharp	Sharp	Sharp	Sharp	Sharp	Sharp	Sharp	Sharp	Sharp
chr11	76839309	76840809	+	NM_000260	MYO7A	coding gene	Non	Non	Non	Non	Non	Non	Non	Non	Non	Non	Non	Non	Non	Non	Non	Non	Non	Non	Non	Non
chr1	171620273	171621773	-	NM_000261	MYOC	coding gene	Non	Non	Non	Non	Non	Non	Non	Non	Non	Non	Non	Non	Non	Non	Non	Non	Non	Non	Non	Non
chr22	42465346	42466846	-	NM_000262	NAGA	coding gene	Sharp	Sharp	Sharp	Sharp	Sharp	Sharp	Sharp	Sharp	Sharp	Sharp	Sharp	Sharp	Sharp	Sharp	Sharp	Sharp	Sharp	Sharp	Sharp	Sharp
chr17	40687950	40689450	+	NM_000263	NAGLU	coding gene	Sharp	Sharp	Sharp	Sharp	Sharp	Sharp	Sharp	Sharp	Sharp	Sharp	Sharp	Sharp	Sharp	Sharp	Sharp	Sharp	Sharp	Sharp	Sharp	Sharp
chr9	98269331	98270831	-	NM_000264	PTCH1	coding gene	Sharp	Intermediate	Broad	Broad	Sharp	Broad	Broad	Non	Broad	Broad	Broad	Broad	Sharp	Non	Broad	Non	Broad	Broad	Broad	Non
chr7	74188308	74189808	+	NM_000265	NCF1	coding gene	Non	Non	Non	Non	Sharp	Non	Sharp	Sharp	Sharp	Sharp	Non	Non	Non	Non	Non	Non	Non	Non	Non	Non
chrX	43831421	43832921	-	NM_000266	NDP	coding gene	Non	Non	Non	Non	Non	Non	Non	Non	Non	Sharp	Non	Sharp	Non	Non	Non	Non	Non	Non	Non	Non
chr17	29421944	29423444	+	NM_000267	NF1	coding gene	Sharp	Sharp	Sharp	Sharp	Sharp	Intermediate	Sharp	Intermediate	Sharp	Sharp	Intermediate	Sharp	Sharp	Sharp	Sharp	Sharp	Sharp	Sharp	Intermediate	Sharp
chr22	29999544	30001044	+	NM_000268	NF2	coding gene	Sharp	Sharp	Sharp	Sharp	Sharp	Sharp	Sharp	Intermediate	Sharp	Sharp	Sharp	Sharp	Sharp	Intermediate	Intermediate	Intermadiate	Sharp	Sharp	Intermediate	Sharp
chr17	49230919	49232419	+	NM_000269	NME1	coding gene	Sharp	Sharp	Sharp	Sharp	Sharp	Intermediate	Sharp	Intermediate	Sharp	Sharp	Sharp	Sharp	Sharp	Sharp	Sharp	Sharp	Sharp	Sharp	Intermediate	Sharp
chr14	20937537	20939037	+	NM_000270	PNP	coding gene	Sharp	Sharp	Sharp	Sharp	Sharp	Sharp	Sharp	Intermediate	Intermediate	Intermediate	Intermediate	Intermediate	Sharp	Intermediate	Sharp	Broad	Sharp	Sharp	Intermediate	Intermediate
chr18	21165081	21166581	-	NM_000271	NPC1	coding gene	Sharp	Sharp	Sharp	Sharp	Sharp	Intermediate	Sharp	Intermediate	Sharp	Sharp	Sharp	Sharp	Sharp	Intermediate	Sharp	Intermadiate	Sharp	Sharp	Sharp	Sharp
chr2	110961139	110962639	-	NM_000272	NPHP1	coding gene	Sharp	Sharp	Sharp	Sharp	Sharp	Non	Sharp	Sharp	Sharp	Sharp	Sharp	Sharp	Sharp	Sharp	Sharp	Sharp	Sharp	Sharp	Sharp	Sharp
chrX	9732505	9734005	-	NM_000273	GPR143	coding gene	Non	Non	Non	Non	Non	Non	Non	Non	Non	Non	Non	Non	Non	Non	Non	Non	Non	Non	Non	Non
chr10	126106045	126107545	-	NM_000274	OAT	coding gene	Sharp	Sharp	Sharp	Sharp	Sharp	Non	Sharp	Sharp	Sharp	Sharp	Sharp	Sharp	Sharp	Non	Sharp	Intermadiate	Sharp	Sharp	Non	Non
chr15	28342958	28344458	-	NM_000275	OCA2	coding gene	Non	Sharp	Sharp	Sharp	Non	Non	Non	Non	Non	Sharp	Non	Sharp	Non	Non	Sharp	Non	Non	Sharp	Sharp	Non
chrX	128674251	128675751	+	NM_000276	OCRL	coding gene	Sharp	Sharp	Sharp	Sharp	Sharp	Sharp	Sharp	Sharp	Sharp	Sharp	Sharp	Sharp	Sharp	Sharp	Sharp	Sharp	Sharp	Sharp	Sharp	Sharp
chr12	103309881	103311381	-	NM_000277	PAH	coding gene	Non	Non	Sharp	Non	Non	Non	Sharp	Non	Sharp	Sharp	Sharp	Sharp	Non	Non	Non	Non	Non	Non	Non	Non
chr10	102505467	102506967	+	NM_000278	PAX2	coding gene	Non	Non	Non	Non	Sharp	Non	Non	Non	Non	Sharp	Non	Non	Non	Non	Non	Intermadiate	Non	Sharp	Non	Non
chr11	31831379	31832879	-	NM_000280	PAX6	coding gene	Sharp	Sharp	Sharp	Sharp	Non	Non	Non	Non	Sharp	Sharp	Non	Sharp	Non	Non	Sharp	Non	Sharp	Broad	Broad	Intermediate
chr10	72647041	72648541	-	NM_000281	PCBD1	coding gene	Sharp	Sharp	Sharp	Sharp	Sharp	Sharp	Sharp	Sharp	Sharp	Sharp	Sharp	Sharp	Sharp	Sharp	Sharp	Sharp	Sharp	Sharp	Sharp	Non
chr13	100741268	100742768	+	NM_000282	PCCA	coding gene	Sharp	Sharp	Sharp	Sharp	Sharp	Sharp	Sharp	Sharp	Sharp	Sharp	Sharp	Sharp	Sharp	Intermediate	Sharp	Intermadiate	Sharp	Sharp	Intermediate	Sharp
chr4	619362	620862	+	NM_000283	PDE6B	coding gene	Non	Non	Non	Non	Non	Non	Non	Non	Non	Non	Non	Non	Non	Non	Non	Non	Non	Non	Non	Non
chrX	19362010	19363510	+	NM_000284	PDHA1	coding gene	Sharp	Sharp	Sharp	Sharp	Sharp	Sharp	Sharp	Sharp	Sharp	Sharp	Sharp	Sharp	Sharp	Sharp	Sharp	Intermadiate	Sharp	Sharp	Intermediate	Sharp
chr19	34011299	34012799	-	NM_000285	PEPD	coding gene	Sharp	Sharp	Sharp	Sharp	Sharp	Sharp	Sharp	Sharp	Sharp	Sharp	Sharp	Sharp	Sharp	Sharp	Sharp	Sharp	Sharp	Sharp	Sharp	Sharp
chr17	33904156	33905656	-	NM_000286	PEX12	coding gene	Sharp	Sharp	Sharp	Sharp	Sharp	Sharp	Sharp	Sharp	Sharp	Sharp	Sharp	Sharp	Sharp	Sharp	Intermediate	Sharp	Sharp	Sharp	Sharp	Sharp
chr6	42945481	42946981	-	NM_000287	PEX6	coding gene	Sharp	Sharp	Sharp	Sharp	Sharp	Intermediate	Sharp	Sharp	Sharp	Sharp	Sharp	Intermediate	Sharp	Intermediate	Sharp	Sharp	Sharp	Intermediate	Intermediate	Intermediate
chr6	137143701	137145201	+	NM_000288	PEX7	coding gene	Sharp	Sharp	Sharp	Sharp	Sharp	Sharp	Sharp	Sharp	Sharp	Sharp	Sharp	Sharp	Sharp	Sharp	Sharp	Sharp	Sharp	Sharp	Sharp	Sharp
chr12	48513012	48514512	+	NM_000289	PFKM	coding gene	Sharp	Sharp	Sharp	Sharp	Sharp	Sharp	Sharp	Sharp	Sharp	Sharp	Sharp	Sharp	Non	Sharp	Non	Sharp	Sharp	Sharp	Sharp	Non
chr7	44103686	44105186	-	NM_000290	PGAM2	coding gene	Non	Non	Non	Non	Non	Non	Non	Non	Non	Non	Non	Non	Non	Non	Non	Non	Non	Non	Non	Non
chrX	77359665	77361165	+	NM_000291	PGK1	coding gene	Intermediate	Intermediate	Intermediate	Intermediate	Sharp	Broad	Intermediate	Broad	Broad	Intermediate	Intermediate	Intermediate	Sharp	Broad	Broad	Broad	Broad	Broad	Broad	Broad
chrX	19000980	19002480	-	NM_000292	PHKA2	coding gene	Sharp	Sharp	Sharp	Sharp	Sharp	Sharp	Sharp	Intermediate	Sharp	Sharp	Sharp	Sharp	Sharp	Intermediate	Sharp	Intermadiate	Sharp	Sharp	Intermediate	Sharp
chr16	47495209	47496709	+	NM_000293	PHKB	coding gene	Intermediate	Broad	Broad	Intermediate	Sharp	Intermediate	Sharp	Intermediate	Sharp	Intermediate	Intermediate	Intermediate	Sharp	Intermediate	Intermediate	Broad	Sharp	Sharp	Intermediate	Intermediate
chr16	30759619	30761119	+	NM_000294	PHKG2	coding gene	Sharp	Sharp	Sharp	Sharp	Sharp	Sharp	Sharp	Sharp	Sharp	Sharp	Sharp	Sharp	Sharp	Sharp	Sharp	Sharp	Sharp	Sharp	Sharp	Sharp
chr14	94853653	94855153	-	NM_000295	SERPINA1	coding gene	Non	Non	Non	Non	Non	Non	Non	Non	Non	Non	Non	Non	Non	Non	Non	Non	Non	Non	Non	Non
chr16	2184399	2185899	-	NM_000296	PKD1	coding gene	Sharp	Sharp	Sharp	Sharp	Sharp	Sharp	Sharp	Sharp	Sharp	Sharp	Sharp	Intermediate	Sharp	Sharp	Sharp	Non	Sharp	Sharp	Intermediate	Sharp
chr4	88928798	88930298	+	NM_000297	PKD2	coding gene	Sharp	Sharp	Sharp	Sharp	Sharp	Intermediate	Intermediate	Broad	Sharp	Intermediate	Sharp	Intermediate	Sharp	Intermediate	Sharp	Broad	Sharp	Intermediate	Sharp	Sharp
chr1	155269725	155271225	-	NM_000298	PKLR	coding gene	Non	Non	Non	Non	Non	Non	Non	Non	Non	Non	Non	Non	Non	Non	Non	Non	Non	Non	Non	Non
chr1	201252579	201254079	+	NM_000299	PKP1	coding gene	Non	Non	Sharp	Sharp	Non	Broad	Sharp	Non	Non	Sharp	Non	Sharp	Non	Non	Non	Non	Sharp	Non	Sharp	Non
chr1	20305432	20306932	-	NM_000300	PLA2G2A	coding gene	Non	Non	Non	Non	Non	Non	Non	Non	Non	Non	Non	Non	Non	Non	Non	Non	Non	Non	Non	Non
chr6	161123224	161124724	+	NM_000301	PLG	coding gene	Non	Non	Non	Non	Non	Non	Non	Non	Non	Non	Non	Non	Non	Non	Non	Non	Non	Non	Non	Non
chr1	11994723	11996223	+	NM_000302	PLOD1	coding gene	Sharp	Sharp	Sharp	Sharp	Sharp	Sharp	Sharp	Sharp	Sharp	Sharp	Sharp	Sharp	Sharp	Sharp	Sharp	Sharp	Sharp	Sharp	Sharp	Sharp
chr16	8891669	8893169	+	NM_000303	PMM2	coding gene	Sharp	Sharp	Sharp	Sharp	Sharp	Intermediate	Sharp	Sharp	Sharp	Sharp	Sharp	Intermediate	Sharp	Broad	Intermediate	Intermadiate	Broad	Intermediate	Intermediate	Broad
chr17	15167144	15168644	-	NM_000304	PMP22	coding gene	Non	Non	Non	Non	Non	Non	Non	Non	Non	Non	Non	Non	Non	Non	Non	Non	Non	Non	Non	Non
chr7	95062884	95064384	-	NM_000305	PON2	coding gene	Sharp	Sharp	Sharp	Sharp	Non	Sharp	Sharp	Sharp	Sharp	Sharp	Sharp	Sharp	Non	Non	Non	Non	Sharp	Sharp	Sharp	Non
chr3	87324237	87325737	-	NM_000306	POU1F1	coding gene	Non	Non	Non	Non	Non	Non	Non	Non	Non	Non	Non	Non	Non	Non	Non	Non	Non	Non	Non	Non
chrX	82763268	82764768	+	NM_000307	POU3F4	coding gene	Non	Non	Non	Non	Non	Non	Non	Non	Non	Non	Non	Non	Non	Non	Non	Non	Non	Non	Non	Non
chr20	44519590	44521090	+	NM_000308	CTSA	coding gene	Sharp	Sharp	Sharp	Sharp	Sharp	Sharp	Sharp	Intermediate	Sharp	Sharp	Sharp	Sharp	Sharp	Sharp	Sharp	Sharp	Sharp	Sharp	Sharp	Sharp
chr1	161136180	161137680	+	NM_000309	PPOX	coding gene	Sharp	Sharp	Sharp	Sharp	Sharp	Sharp	Sharp	Sharp	Sharp	Sharp	Sharp	Sharp	Sharp	Sharp	Sharp	Sharp	Sharp	Sharp	Sharp	Sharp
chr1	40561642	40563142	-	NM_000310	PPT1	coding gene	Sharp	Sharp	Sharp	Sharp	Sharp	Sharp	Sharp	Sharp	Sharp	Sharp	Sharp	Sharp	Sharp	Sharp	Sharp	Sharp	Sharp	Sharp	Sharp	Sharp
chr20	4666796	4668296	+	NM_000311	PRNP	coding gene	Sharp	Sharp	Sharp	Sharp	Sharp	Sharp	Sharp	Sharp	Sharp	Sharp	Sharp	Sharp	Sharp	Sharp	Sharp	Sharp	Sharp	Sharp	Intermediate	Non
chr2	128175995	128177495	+	NM_000312	PROC	coding gene	Non	Non	Non	Non	Non	Non	Non	Non	Non	Non	Non	Non	Non	Non	Non	Non	Non	Non	Non	Non
chr3	93691434	93692934	-	NM_000313	PROS1	coding gene	Sharp	Sharp	Sharp	Sharp	Sharp	Sharp	Sharp	Sharp	Sharp	Sharp	Sharp	Sharp	Sharp	Sharp	Sharp	Sharp	Sharp	Sharp	Sharp	Sharp
chr10	89623194	89624694	+	NM_000314	PTEN	coding gene	Broad	Broad	Broad	Broad	Broad	Broad	Broad	Broad	Broad	Broad	Broad	Broad	Broad	Broad	Broad	Broad	Broad	Broad	Intermediate	Broad
chr11	13516067	13517567	-	NM_000315	PTH	coding gene	Non	Non	Non	Non	Non	Non	Non	Non	Non	Non	Non	Non	Non	Non	Non	Non	Non	Non	Non	Non
chr3	46919235	46920735	+	NM_000316	PTH1R	coding gene	Non	Non	Non	Non	Non	Non	Non	Non	Non	Non	Non	Non	Non	Non	Non	Non	Non	Non	Non	Non
chr11	112097087	112098587	+	NM_000317	PTS	coding gene	Sharp	Sharp	Sharp	Sharp	Sharp	Sharp	Sharp	Sharp	Sharp	Sharp	Sharp	Sharp	Sharp	Sharp	Sharp	Intermadiate	Sharp	Sharp	Sharp	Sharp
chr8	77911024	77912524	-	NM_000318	PEX2	coding gene	Intermediate	Intermediate	Intermediate	Intermediate	Sharp	Broad	Intermediate	Intermediate	Sharp	Intermediate	Intermediate	Intermediate	Sharp	Broad	Intermediate	Broad	Sharp	Sharp	Intermediate	Intermediate
chr12	7342957	7344457	+	NM_000319	PEX5	coding gene	Intermediate	Intermediate	Sharp	Sharp	Sharp	Intermediate	Intermediate	Sharp	Intermediate	Intermediate	Intermediate	Intermediate	Non	Sharp	Intermediate	Intermadiate	Sharp	Sharp	Intermediate	Sharp
chr4	17512357	17513857	-	NM_000320	QDPR	coding gene	Sharp	Sharp	Sharp	Sharp	Sharp	Sharp	Sharp	Sharp	Sharp	Sharp	Sharp	Sharp	Sharp	Sharp	Sharp	Sharp	Sharp	Sharp	Sharp	Sharp
chr13	48877882	48879382	+	NM_000321	RB1	coding gene	Intermediate	Sharp	Sharp	Sharp	Sharp	Broad	Intermediate	Broad	Intermediate	Intermediate	Intermediate	Intermediate	Sharp	Intermediate	Broad	Broad	Intermediate	Intermediate	Intermediate	Broad
chr6	42688858	42690358	-	NM_000322	PRPH2	coding gene	Non	Non	Non	Non	Non	Non	Non	Non	Non	Non	Non	Non	Non	Non	Non	Non	Non	Non	Non	Non
chr6	49603087	49604587	-	NM_000324	RHAG	coding gene	Non	Non	Non	Non	Non	Non	Non	Non	Non	Intermediate	Non	Non	Non	Non	Non	Non	Non	Non	Non	Non
chr4	111542754	111544254	-	NM_000325	PITX2	coding gene	Sharp	Sharp	Intermediate	Sharp	Non	Non	Non	Non	Sharp	Sharp	Non	Non	Non	Non	Sharp	Non	Non	Sharp	Sharp	Intermediate
chr15	89763422	89764922	-	NM_000326	RLBP1	coding gene	Non	Non	Non	Non	Non	Non	Non	Non	Non	Non	Non	Non	Non	Non	Non	Non	Non	Non	Non	Non
chr11	62380212	62381712	+	NM_000327	ROM1	coding gene	Sharp	Sharp	Sharp	Sharp	Sharp	Sharp	Sharp	Sharp	Sharp	Sharp	Sharp	Sharp	Sharp	Sharp	Sharp	Sharp	Sharp	Sharp	Sharp	Sharp
chrX	38185288	38186788	-	NM_000328	RPGR	coding gene	Sharp	Sharp	Sharp	Sharp	Sharp	Sharp	Sharp	Sharp	Sharp	Sharp	Sharp	Sharp	Sharp	Sharp	Sharp	Broad	Sharp	Sharp	Intermediate	Sharp
chr1	68914142	68915642	-	NM_000329	RPE65	coding gene	Non	Non	Non	Non	Non	Non	Non	Non	Non	Non	Non	Non	Non	Non	Non	Non	Non	Non	Non	Non
chrX	18688723	18690223	-	NM_000330	RS1	coding gene	Non	Non	Non	Non	Non	Non	Non	Non	Non	Non	Non	Non	Non	Non	Non	Non	Non	Non	Non	Non
chr11	18287807	18289307	+	NM_000331	SAA1	coding gene	Non	Non	Non	Non	Non	Non	Non	Non	Non	Non	Non	Non	Non	Non	Non	Non	Non	Non	Non	Non
chr6	16760221	16761721	-	NM_000332	ATXN1	coding gene	Intermediate	Intermediate	Intermediate	Intermediate	Broad	Broad	Broad	Broad	Broad	Broad	Broad	Intermediate	Broad	Intermediate	Intermediate	Broad	Intermediate	Intermediate	Intermediate	Sharp
chr3	63850232	63851732	+	NM_000333	ATXN7	coding gene	Intermediate	Sharp	Sharp	Sharp	Intermediate	Intermediate	Intermediate	Intermediate	Intermediate	Intermediate	Sharp	Sharp	Sharp	Intermediate	Intermediate	Broad	Sharp	Intermediate	Intermediate	Intermediate
chr17	62048778	62050278	-	NM_000334	SCN4A	coding gene	Non	Non	Non	Non	Non	Non	Non	Non	Non	Non	Non	Non	Non	Non	Non	Non	Non	Non	Non	Non
chr3	38689663	38691163	-	NM_000335	SCN5A	coding gene	Sharp	Sharp	Sharp	Sharp	Sharp	Sharp	Sharp	Sharp	Sharp	Sharp	Sharp	Sharp	Sharp	Sharp	Sharp	Non	Sharp	Sharp	Sharp	Non
chr16	23313590	23315090	+	NM_000336	SCNN1B	coding gene	Non	Non	Non	Non	Non	Non	Non	Non	Non	Non	Non	Non	Non	Non	Non	Non	Non	Non	Non	Non
chr5	155753766	155755266	+	NM_000337	SGCD	coding gene	Non	Non	Non	Non	Non	Non	Non	Non	Non	Non	Non	Non	Non	Non	Non	Non	Non	Non	Non	Non
chr15	48498497	48499997	+	NM_000338	SLC12A1	coding gene	Non	Non	Non	Non	Non	Non	Non	Non	Non	Non	Non	Non	Non	Non	Non	Non	Non	Non	Non	Non
chr16	56899118	56900618	+	NM_000339	SLC12A3	coding gene	Non	Non	Non	Non	Non	Non	Non	Non	Non	Non	Non	Non	Non	Non	Non	Non	Non	Non	Non	Non
chr3	170743268	170744768	-	NM_000340	SLC2A2	coding gene	Non	Non	Non	Non	Non	Non	Non	Non	Non	Non	Non	Non	Non	Non	Non	Non	Non	Non	Non	Non
chr2	44502596	44504096	+	NM_000341	SLC3A1	coding gene	Non	Non	Non	Non	Non	Non	Non	Non	Non	Non	Non	Non	Non	Non	Non	Non	Non	Non	Non	Non
chr17	42344002	42345502	-	NM_000342	SLC4A1	coding gene	Non	Non	Non	Non	Non	Non	Non	Non	Non	Sharp	Non	Non	Non	Non	Non	Non	Non	Non	Non	Non
chr22	32439018	32440518	+	NM_000343	SLC5A1	coding gene	Non	Non	Non	Non	Non	Non	Non	Non	Non	Non	Non	Non	Non	Non	Non	Non	Non	Non	Non	Non
chr5	69345349	69346849	+	NM_000344	SMN1	coding gene	Sharp	Sharp	Intermediate	Sharp	Sharp	Sharp	Sharp	Sharp	Sharp	Sharp	Sharp	Sharp	Sharp	Sharp	Non	Non	Sharp	Sharp	Intermediate	Sharp
chr5	70220767	70222267	+	NM_000344_1	None	coding gene	Sharp	Sharp	Sharp	Sharp	Sharp	Sharp	Sharp	Sharp	Sharp	Sharp	Sharp	Sharp	Sharp	Non	Non	Non	Sharp	Sharp	Intermediate	Sharp
chr4	90756850	90758350	-	NM_000345	SNCA	coding gene	Sharp	Sharp	Sharp	Sharp	Intermediate	Sharp	Sharp	Intermediate	Sharp	Sharp	Sharp	Sharp	Non	Intermediate	Sharp	Broad	Non	Sharp	Non	Non
chr17	70117160	70118660	+	NM_000346	SOX9	coding gene	Non	Non	Non	Non	Non	Non	Non	Non	Non	Non	Non	Non	Non	Non	Non	Non	Non	Non	Non	Non
chr14	65288366	65289866	-	NM_000347	None	coding gene	Non	Non	Non	Non	Non	Non	Non	Non	Non	Non	Non	Non	Non	Non	Non	Sharp	Non	Non	Non	Non
chr2	31804540	31806040	-	NM_000348	SRD5A2	coding gene	Non	Non	Non	Non	Non	Non	Non	Non	Non	Non	Non	Non	Non	Non	Non	Non	Non	Non	Non	Non
chr8	38007100	38008600	-	NM_000349	STAR	coding gene	Non	Non	Sharp	Sharp	Sharp	Sharp	Sharp	Sharp	Sharp	Sharp	Sharp	Sharp	Non	Sharp	Non	Sharp	Non	Sharp	Sharp	Sharp
chr1	94585205	94586705	-	NM_000350	ABCA4	coding gene	Non	Non	Non	Non	Non	Non	Non	Non	Non	Non	Non	Non	Non	Non	Non	Non	Non	Non	Non	Non
chrX	7137471	7138971	+	NM_000351	STS	coding gene	Non	Non	Non	Non	Non	Non	Non	Non	Non	Non	Non	Non	Non	Non	Non	Non	Non	Non	Non	Non
chr11	17496949	17498449	-	NM_000352	ABCC8	coding gene	Non	Non	Non	Non	Sharp	Sharp	Sharp	Sharp	Non	Sharp	Non	Sharp	Non	Sharp	Sharp	Sharp	Non	Non	Non	Intermediate
chr16	71609498	71610998	-	NM_000353	TAT	coding gene	Non	Non	Non	Non	Non	Non	Non	Non	Non	Non	Non	Non	Non	Non	Non	Non	Non	Non	Non	Non
chrX	105281218	105282718	-	NM_000354	SERPINA7	coding gene	Non	Non	Non	Non	Non	Non	Non	Non	Non	Non	Non	Non	Non	Non	Non	Non	Non	Non	Non	Non
chr22	31003069	31004569	+	NM_000355	TCN2	coding gene	Sharp	Sharp	Sharp	Sharp	Sharp	Sharp	Sharp	Broad	Sharp	Sharp	Sharp	Sharp	Non	Non	Non	Sharp	Sharp	Non	Sharp	Sharp
chr5	149737201	149738701	+	NM_000356	TCOF1	coding gene	Sharp	Sharp	Sharp	Sharp	Sharp	Sharp	Sharp	Sharp	Sharp	Sharp	Sharp	Sharp	Sharp	Intermediate	Sharp	Intermadiate	Sharp	Sharp	Sharp	Sharp
chr5	135364583	135366083	+	NM_000358	TGFBI	coding gene	Non	Non	Non	Non	Non	Non	Non	Non	Sharp	Sharp	Non	Non	Non	Non	Non	Non	Non	Non	Non	Non
chr14	24730916	24732416	-	NM_000359	TGM1	coding gene	Non	Non	Non	Non	Non	Non	Non	Non	Non	Non	Non	Non	Non	Non	Non	Non	Non	Non	Non	Non
chr11	2191535	2193035	-	NM_000360	TH	coding gene	Non	Non	Non	Non	Non	Non	Non	Non	Non	Non	Non	Non	Non	Non	Non	Non	Non	Non	Non	Non
chr20	23028801	23030301	-	NM_000361	THBD	coding gene	Sharp	Intermediate	Intermediate	Intermediate	Sharp	Non	Broad	Broad	Intermediate	Intermediate	Sharp	Sharp	Non	Non	Non	Sharp	Non	Sharp	Non	Non
chr22	33196801	33198301	+	NM_000362	TIMP3	coding gene	Sharp	Sharp	Sharp	Sharp	Non	Non	Sharp	Non	Non	Sharp	Sharp	Sharp	Non	Non	Sharp	Non	Non	Non	Non	Non
chr19	55667600	55669100	-	NM_000363	TNNI3	coding gene	Non	Non	Non	Non	Non	Non	Non	Non	Non	Non	Non	Non	Non	Non	Non	Non	Non	Non	Sharp	Non
chr1	201345305	201346805	-	NM_000364	TNNT2	coding gene	Non	Non	Non	Non	Non	Non	Non	Non	Non	Non	Non	Non	Non	Non	Non	Non	Non	Non	Non	Non
chr12	6976692	6978192	+	NM_000365	TPI1	coding gene	Sharp	Sharp	Sharp	Intermediate	Sharp	Sharp	Sharp	Sharp	Sharp	Sharp	Sharp	Sharp	Sharp	Broad	Intermediate	Broad	Sharp	Sharp	Intermediate	Sharp
chr15	63334837	63336337	+	NM_000366	TPM1	coding gene	Non	Non	Sharp	Sharp	Sharp	Non	Sharp	Sharp	Sharp	Sharp	Sharp	Sharp	Non	Non	Sharp	Non	Non	Non	Non	Non
chr6	18153874	18155374	-	NM_000367	TPMT	coding gene	Sharp	Sharp	Sharp	Sharp	Sharp	Sharp	Sharp	Broad	Sharp	Sharp	Sharp	Sharp	Sharp	Sharp	Sharp	Intermadiate	Sharp	Sharp	Sharp	Sharp
chr9	135818520	135820020	-	NM_000368	TSC1	coding gene	Sharp	Sharp	Sharp	Sharp	Sharp	Sharp	Sharp	Intermediate	Sharp	Sharp	Sharp	Sharp	Sharp	Sharp	Intermediate	Intermadiate	Sharp	Sharp	Sharp	Sharp
chr14	81421868	81423368	+	NM_000369	TSHR	coding gene	Broad	Broad	Sharp	Sharp	Sharp	Broad	Broad	Sharp	Broad	Broad	Broad	Broad	Non	Broad	Broad	Sharp	Broad	Non	Broad	Broad
chr8	63997112	63998612	-	NM_000370	TTPA	coding gene	Non	Non	Non	Non	Non	Non	Non	Non	Non	Sharp	Non	Non	Sharp	Non	Non	Non	Non	Non	Non	Non
chr18	29171729	29173229	+	NM_000371	TTR	coding gene	Non	Non	Non	Non	Non	Non	Non	Non	Non	Non	Non	Non	Non	Non	Non	Non	Non	Non	Non	Non
chr11	88911039	88912539	+	NM_000372	TYR	coding gene	Non	Non	Non	Non	Non	Non	Non	Non	Non	Non	Non	Non	Non	Non	Non	Non	Non	Non	Non	Non
chr3	124449212	124450712	+	NM_000373	UMPS	coding gene	Sharp	Sharp	Sharp	Sharp	Sharp	Sharp	Sharp	Sharp	Sharp	Sharp	Sharp	Sharp	Sharp	Intermediate	Intermediate	Intermadiate	Sharp	Sharp	Intermediate	Sharp
chr1	45477804	45479304	+	NM_000374	UROD	coding gene	Intermediate	Intermediate	Intermediate	Intermediate	Sharp	Intermediate	Intermediate	Intermediate	Intermediate	Broad	Intermediate	Intermediate	Non	Broad	Intermediate	Broad	Sharp	Intermediate	Intermediate	Intermediate
chr10	127510337	127511837	-	NM_000375	UROS	coding gene	Sharp	Sharp	Sharp	Sharp	Sharp	Intermediate	Intermediate	Intermediate	Sharp	Sharp	Intermediate	Intermediate	Sharp	Intermediate	Intermediate	Broad	Intermediate	Sharp	Intermediate	Sharp
chr12	48297314	48298814	-	NM_000376	VDR	coding gene	Sharp	Sharp	Sharp	Sharp	Sharp	Sharp	Sharp	Sharp	Sharp	Sharp	Sharp	Sharp	Non	Non	Sharp	Sharp	Non	Sharp	Sharp	Non
chrX	48542185	48543685	+	NM_000377	WAS	coding gene	Sharp	Sharp	Sharp	Sharp	Sharp	Sharp	Sharp	Sharp	Sharp	Sharp	Sharp	Sharp	Non	Sharp	Sharp	Intermadiate	Sharp	Sharp	Sharp	Sharp
chr11	32455581	32457081	-	NM_000378	WT1	coding gene	Non	Non	Non	Non	Sharp	Broad	Sharp	Non	Non	Sharp	Sharp	Intermediate	Sharp	Non	Non	Non	Sharp	Intermediate	Broad	Broad
chr2	31636111	31637611	-	NM_000379	XDH	coding gene	Non	Non	Non	Non	Non	Non	Non	Non	Non	Non	Non	Non	Non	Non	Non	Non	Non	Non	Non	Non
chr9	100458191	100459691	-	NM_000380	XPA	coding gene	Sharp	Sharp	Sharp	Sharp	Sharp	Sharp	Sharp	Sharp	Sharp	Sharp	Sharp	Sharp	Sharp	Intermediate	Sharp	Intermadiate	Intermediate	Intermediate	Intermediate	Intermediate
chrX	10587174	10588674	-	NM_000381	MID1	coding gene	Non	Sharp	Sharp	Sharp	Non	Non	Sharp	Non	Sharp	Sharp	Sharp	Sharp	Non	Non	Sharp	Non	Non	Sharp	Sharp	Non
chr17	19552063	19553563	+	NM_000382	ALDH3A2	coding gene	Sharp	Sharp	Sharp	Sharp	Non	Sharp	Sharp	Sharp	Sharp	Sharp	Sharp	Sharp	Sharp	Non	Sharp	Non	Sharp	Sharp	Non	Non
chr21	45705762	45707262	+	NM_000383	AIRE	coding gene	Non	Non	Non	Non	Non	Non	Non	Non	Non	Non	Non	Non	Non	Non	Non	Non	Non	Non	Non	Non
chr2	21265445	21266945	-	NM_000384	APOB	coding gene	Non	Non	Non	Non	Non	Non	Non	Non	Non	Non	Non	Non	Non	Non	Non	Non	Non	Non	Non	Non
chr17	28617684	28619184	-	NM_000386	BLMH	coding gene	Sharp	Sharp	Sharp	Sharp	Sharp	Sharp	Sharp	Sharp	Sharp	Sharp	Sharp	Sharp	Sharp	Sharp	Sharp	Sharp	Sharp	Sharp	Sharp	Sharp
chr3	48934926	48936426	-	NM_000387	SLC25A20	coding gene	Sharp	Sharp	Sharp	Sharp	Sharp	Sharp	Sharp	Sharp	Sharp	Sharp	Sharp	Sharp	Sharp	Sharp	Sharp	Sharp	Sharp	Sharp	Sharp	Sharp
chr3	121902529	121904029	+	NM_000388	CASR	coding gene	Non	Non	Non	Non	Non	Non	Non	Non	Non	Sharp	Non	Non	Non	Non	Non	Non	Non	Non	Non	Non
chr6	36646455	36647955	+	NM_000389	CDKN1A	coding gene	Intermediate	Sharp	Intermediate	Sharp	Sharp	Intermediate	Sharp	Intermediate	Sharp	Sharp	Sharp	Intermediate	Sharp	Sharp	Sharp	Sharp	Sharp	Sharp	Intermediate	Sharp
chrX	85301066	85302566	-	NM_000390	CHM	coding gene	Sharp	Sharp	Sharp	Sharp	Sharp	Sharp	Sharp	Sharp	Sharp	Sharp	Sharp	Sharp	Non	Sharp	Sharp	Sharp	Sharp	Sharp	Sharp	Sharp
chr11	6639192	6640692	-	NM_000391	TPP1	coding gene	Sharp	Sharp	Sharp	Sharp	Sharp	Sharp	Sharp	Sharp	Sharp	Sharp	Sharp	Sharp	Sharp	Sharp	Sharp	Sharp	Sharp	Sharp	Sharp	Sharp
chr10	101542462	101543962	+	NM_000392	ABCC2	coding gene	Non	Non	Non	Non	Non	Non	Non	Non	Non	Non	Non	Non	Non	Non	Non	Non	Non	Non	Non	Non
chr2	190043105	190044605	-	NM_000393	COL5A2	coding gene	Non	Non	Non	Non	Non	Non	Non	Non	Non	Non	Non	Non	Non	Non	Non	Non	Non	Non	Non	Non
chr21	44589140	44590640	+	NM_000394	CRYAA	coding gene	Non	Non	Non	Non	Non	Non	Non	Non	Non	Non	Non	Non	Non	Non	Non	Non	Non	Non	Non	Non
chr22	37309674	37311174	+	NM_000395	CSF2RB	coding gene	Non	Non	Non	Non	Sharp	Non	Sharp	Sharp	Sharp	Sharp	Non	Non	Non	Non	Non	Non	Non	Non	Non	Non
chr1	150779417	150780917	-	NM_000396	CTSK	coding gene	Non	Non	Non	Non	Non	Sharp	Sharp	Sharp	Non	Non	Non	Non	Non	Non	Non	Non	Non	Non	Non	Non
chrX	37639269	37640769	+	NM_000397	CYBB	coding gene	Non	Non	Non	Non	Non	Non	Sharp	Non	Sharp	Sharp	Non	Non	Non	Non	Non	Non	Non	Non	Non	Non
chr22	43043905	43045405	-	NM_000398	CYB5R3	coding gene	Sharp	Sharp	Sharp	Sharp	Sharp	Sharp	Sharp	Sharp	Sharp	Sharp	Sharp	Sharp	Sharp	Sharp	Sharp	Intermadiate	Sharp	Intermediate	Intermediate	Sharp
chr10	64574626	64576126	-	NM_000399	EGR2	coding gene	Intermediate	Broad	Broad	Broad	Intermediate	Sharp	Intermediate	Intermediate	Intermediate	Broad	Intermediate	Intermediate	Non	Sharp	Intermediate	Sharp	Sharp	Intermediate	Intermediate	Sharp
chr19	45872345	45873845	-	NM_000400	ERCC2	coding gene	Sharp	Sharp	Sharp	Sharp	Sharp	Sharp	Sharp	Sharp	Sharp	Sharp	Sharp	Sharp	Sharp	Sharp	Sharp	Sharp	Sharp	Sharp	Intermediate	Sharp
chr11	44117746	44119246	+	NM_000401	EXT2	coding gene	Sharp	Sharp	Sharp	Sharp	Sharp	Sharp	Sharp	Sharp	Sharp	Sharp	Sharp	Sharp	Sharp	Sharp	Sharp	Sharp	Sharp	Sharp	Sharp	Sharp
chrX	153773733	153775233	-	NM_000402	G6PD	coding gene	Intermediate	Sharp	Sharp	Sharp	Sharp	Sharp	Intermediate	Intermediate	Intermediate	Sharp	Sharp	Intermediate	Sharp	Intermediate	Intermediate	Intermadiate	Sharp	Sharp	Intermediate	Intermediate
chr1	24125534	24127034	-	NM_000403	GALE	coding gene	Sharp	Sharp	Sharp	Sharp	Sharp	Sharp	Sharp	Sharp	Sharp	Sharp	Sharp	Intermediate	Sharp	Sharp	Sharp	Sharp	Sharp	Sharp	Intermediate	Sharp
chr3	33137194	33138694	-	NM_000404	GLB1	coding gene	Sharp	Sharp	Sharp	Sharp	Sharp	Sharp	Sharp	Sharp	Sharp	Sharp	Sharp	Sharp	Sharp	Sharp	Sharp	Sharp	Sharp	Sharp	Sharp	Sharp
chr5	150632612	150634112	+	NM_000405	GM2A	coding gene	Sharp	Sharp	Sharp	Sharp	Sharp	Intermediate	Sharp	Intermediate	Sharp	Sharp	Sharp	Sharp	Non	Intermediate	Sharp	Sharp	Intermediate	Intermediate	Sharp	Intermediate
chr4	68620304	68621804	-	NM_000406	GNRHR	coding gene	Non	Non	Non	Non	Non	Non	Non	Non	Non	Non	Non	Non	Non	Non	Non	Non	Non	Non	Non	Non
chr22	19711065	19712565	+	NM_000407	GP1BB	coding gene	Non	Sharp	Sharp	Sharp	Non	Non	Sharp	Non	Non	Sharp	Non	Sharp	Non	Non	Non	Non	Non	Non	Non	Non
chr2	157292899	157294399	+	NM_000408	GPD2	coding gene	Sharp	Sharp	Intermediate	Sharp	Sharp	Intermediate	Intermediate	Sharp	Sharp	Intermediate	Intermediate	Sharp	Sharp	Sharp	Sharp	Intermadiate	Sharp	Non	Sharp	Sharp
chr6	42123143	42124643	+	NM_000409	GUCA1A	coding gene	Non	Non	Non	Non	Non	Non	Non	Non	Non	Non	Non	Non	Non	Non	Non	Non	Non	Non	Non	Non
chr6	26087508	26089008	+	NM_000410	HFE	coding gene	Sharp	Sharp	Sharp	Sharp	Sharp	Sharp	Sharp	Sharp	Sharp	Sharp	Sharp	Sharp	Sharp	Sharp	Non	Non	Sharp	Sharp	Sharp	Sharp
chr21	38361045	38362545	-	NM_000411	HLCS	coding gene	Sharp	Sharp	Sharp	Sharp	Sharp	Sharp	Sharp	Sharp	Sharp	Sharp	Sharp	Sharp	Sharp	Sharp	Sharp	Sharp	Sharp	Sharp	Sharp	Sharp
chr3	186383797	186385297	+	NM_000412	HRG	coding gene	Non	Non	Non	Non	Non	Non	Non	Non	Non	Non	Non	Non	Non	Non	Non	Non	Non	Non	Non	Non
chr17	40703983	40705483	+	NM_000413	HSD17B1	coding gene	Non	Non	Non	Non	Non	Non	Sharp	Non	Non	Non	Non	Non	Non	Sharp	Sharp	Sharp	Non	Non	Non	Non
chr5	118788137	118789637	+	NM_000414	HSD17B4	coding gene	Sharp	Sharp	Sharp	Sharp	Sharp	Sharp	Sharp	Sharp	Sharp	Sharp	Sharp	Sharp	Sharp	Sharp	Sharp	Sharp	Sharp	Sharp	Sharp	Sharp
chr12	21525801	21527301	+	NM_000415	IAPP	coding gene	Non	Non	Non	Non	Non	Non	Non	Non	Non	Non	Non	Non	Non	Non	Non	Non	Non	Non	Non	Non
chr6	137539067	137540567	-	NM_000416	IFNGR1	coding gene	Sharp	Sharp	Sharp	Sharp	Sharp	Sharp	Sharp	Intermediate	Sharp	Sharp	Sharp	Sharp	Sharp	Intermediate	Sharp	Intermadiate	Sharp	Sharp	Sharp	Sharp
chr10	6102833	6104333	-	NM_000417	IL2RA	coding gene	Non	Sharp	Intermediate	Sharp	Non	Non	Sharp	Intermediate	Non	Sharp	Sharp	Non	Non	Non	Sharp	Sharp	Sharp	Non	Sharp	Non
chr16	27325250	27326750	+	NM_000418	IL4R	coding gene	Sharp	Sharp	Intermediate	Sharp	Sharp	Sharp	Intermediate	Intermediate	Intermediate	Intermediate	Sharp	Intermediate	Sharp	Sharp	Sharp	Sharp	Sharp	Sharp	Sharp	Sharp
chr17	42465373	42466873	-	NM_000419	ITGA2B	coding gene	Non	Non	Non	Non	Non	Non	Non	Sharp	Non	Non	Non	Non	Non	Non	Non	Sharp	Non	Non	Non	Non
chr7	142658003	142659503	-	NM_000420	KEL	coding gene	Non	Non	Non	Non	Non	Non	Non	Non	Non	Non	Non	Non	Non	Non	Non	Non	Non	Non	Non	Non
chr17	38977363	38978863	-	NM_000421	KRT10	coding gene	Non	Non	Non	Non	Non	Non	Non	Non	Non	Non	Non	Non	Non	Sharp	Sharp	Non	Non	Non	Intermediate	Non
chr17	39779382	39780882	-	NM_000422	KRT17	coding gene	Non	Non	Non	Non	Non	Non	Non	Non	Non	Non	Non	Non	Non	Non	Non	Non	Non	Non	Non	Non
chr12	53044459	53045959	-	NM_000423	KRT2	coding gene	Non	Non	Non	Non	Non	Non	Non	Non	Non	Non	Non	Non	Non	Non	Non	Non	Non	Non	Non	Non
chr12	52912743	52914243	-	NM_000424	KRT5	coding gene	Non	Non	Non	Non	Non	Non	Non	Non	Non	Non	Non	Non	Non	Non	Non	Non	Non	Non	Non	Non
chrX	153139899	153141399	-	NM_000425	L1CAM	coding gene	Non	Non	Non	Non	Non	Non	Non	Non	Non	Non	Non	Non	Non	Non	Non	Non	Non	Non	Non	Non
chr6	129204285	129205785	+	NM_000426	LAMA2	coding gene	Non	Non	Non	Non	Non	Non	Non	Non	Non	Non	Non	Non	Non	Non	Non	Non	Non	Non	Non	Non
chr1	153232178	153233678	+	NM_000427	LOR	coding gene	Non	Non	Sharp	Non	Non	Non	Non	Non	Non	Sharp	Non	Sharp	Non	Non	Non	Non	Non	Sharp	Sharp	Non
chr14	75077534	75079034	-	NM_000428	LTBP2	coding gene	Non	Sharp	Sharp	Sharp	Sharp	Sharp	Sharp	Non	Sharp	Sharp	Sharp	Sharp	Sharp	Non	Sharp	Non	Sharp	Sharp	Non	Non
chr10	82047934	82049434	-	NM_000429	MAT1A	coding gene	Non	Non	Non	Non	Non	Non	Non	Non	Non	Non	Non	Non	Non	Non	Sharp	Sharp	Non	Non	Non	Non
chr17	2496922	2498422	+	NM_000430	PAFAH1B1	coding gene	Intermediate	Intermediate	Broad	Intermediate	Intermediate	Intermediate	Intermediate	Intermediate	Intermediate	Broad	Intermediate	Intermediate	Sharp	Intermediate	Intermediate	Broad	Intermediate	Intermediate	Intermediate	Intermediate
chr12	110011499	110012999	+	NM_000431	MVK	coding gene	Sharp	Sharp	Sharp	Sharp	Sharp	Sharp	Sharp	Sharp	Sharp	Sharp	Sharp	Sharp	Sharp	Sharp	Sharp	Broad	Sharp	Sharp	Sharp	Sharp
chr12	111356904	111358404	-	NM_000432	MYL2	coding gene	Non	Non	Non	Non	Non	Non	Non	Non	Non	Non	Non	Non	Non	Non	Non	Non	Non	Non	Non	Non
chr1	183558239	183559739	-	NM_000433	NCF2	coding gene	Non	Non	Non	Non	Non	Non	Sharp	Sharp	Sharp	Sharp	Non	Sharp	Non	Non	Non	Sharp	Non	Non	Non	Non
chr6	31829209	31830709	-	NM_000434	NEU1	coding gene	Sharp	Sharp	Sharp	Sharp	Sharp	Sharp	Sharp	Intermediate	Sharp	Sharp	Sharp	Sharp	Sharp	Intermediate	Intermediate	Sharp	Sharp	Sharp	Intermediate	Sharp
chr19	15310292	15311792	-	NM_000435	NOTCH3	coding gene	Broad	Sharp	Sharp	Sharp	Sharp	Sharp	Sharp	Sharp	Sharp	Broad	Sharp	Sharp	Sharp	Intermediate	Sharp	Non	Broad	Broad	Sharp	Broad
chr5	41869291	41870791	-	NM_000436	OXCT1	coding gene	Intermediate	Sharp	Sharp	Sharp	Sharp	Sharp	Sharp	Sharp	Sharp	Sharp	Sharp	Sharp	Sharp	Broad	Sharp	Broad	Sharp	Sharp	Intermediate	Sharp
chr1	26323148	26324648	-	NM_000437	PAFAH2	coding gene	Sharp	Sharp	Sharp	Sharp	Sharp	Sharp	Sharp	Sharp	Sharp	Sharp	Sharp	Sharp	Non	Broad	Sharp	Sharp	Sharp	Sharp	Sharp	Sharp
chr2	223162215	223163715	-	NM_000438	PAX3	coding gene	Non	Non	Non	Non	Non	Non	Non	Non	Non	Non	Non	Non	Non	Non	Non	Non	Non	Non	Non	Non
chr5	95767485	95768985	-	NM_000439	PCSK1	coding gene	Non	Non	Non	Non	Non	Non	Non	Non	Non	Non	Non	Non	Non	Non	Non	Non	Non	Non	Non	Non
chr5	149322856	149324356	-	NM_000440	PDE6A	coding gene	Non	Non	Non	Non	Non	Non	Non	Non	Non	Non	Non	Non	Non	Non	Non	Non	Non	Non	Non	Non
chr7	107301079	107302579	+	NM_000441	SLC26A4	coding gene	Non	Sharp	Sharp	Sharp	Non	Non	Sharp	Non	Sharp	Sharp	Sharp	Sharp	Sharp	Sharp	Non	Non	Non	Non	Sharp	Non
chr17	62405583	62407083	-	NM_000442	PECAM1	coding gene	Non	Non	Non	Non	Non	Non	Non	Non	Non	Non	Non	Non	Non	Non	Non	Non	Non	Non	Non	Non
chr7	87103519	87105019	-	NM_000443	ABCB4	coding gene	Non	Non	Non	Sharp	Non	Non	Sharp	Non	Sharp	Sharp	Non	Non	Non	Non	Non	Non	Non	Non	Non	Non
chrX	22050920	22052420	+	NM_000444	PHEX	coding gene	Non	Non	Non	Non	Non	Non	Non	Non	Non	Non	Non	Non	Non	Non	Non	Non	Non	Non	Non	Non
chr8	145049413	145050913	-	NM_000445	PLEC	coding gene	Broad	Broad	Broad	Broad	Sharp	Broad	Broad	Intermediate	Broad	Broad	Sharp	Broad	Sharp	Sharp	Intermediate	Broad	Broad	Broad	Broad	Broad
chr7	94952384	94953884	-	NM_000446	PON1	coding gene	Non	Non	Non	Non	Non	Non	Sharp	Non	Sharp	Sharp	Sharp	Non	Non	Non	Non	Sharp	Sharp	Non	Sharp	Non
chr1	227058272	227059772	+	NM_000447	PSEN2	coding gene	Sharp	Sharp	Sharp	Sharp	Sharp	Sharp	Sharp	Sharp	Sharp	Sharp	Sharp	Sharp	Sharp	Non	Non	Non	Non	Non	Sharp	Non
chr11	36589562	36591062	+	NM_000448	RAG1	coding gene	Broad	Broad	Non	Non	Non	Broad	Non	Sharp	Non	Broad	Sharp	Non	Non	Broad	Sharp	Non	Sharp	Non	Broad	Non
chr1	151318269	151319769	-	NM_000449	RFX5	coding gene	Sharp	Sharp	Sharp	Sharp	Sharp	Sharp	Sharp	Sharp	Sharp	Sharp	Sharp	Sharp	Non	Intermediate	Sharp	Intermadiate	Sharp	Sharp	Intermediate	Sharp
chr1	169701720	169703220	-	NM_000450	SELE	coding gene	Non	Non	Non	Non	Non	Non	Non	Non	Non	Non	Non	Non	Non	Non	Non	Non	Non	Non	Non	Non
chrX	585078	586578	+	NM_000451	SHOX	coding gene	Non	Non	Non	Non	Non	Non	Non	Non	Non	Non	Non	Non	Non	Non	Non	Non	Non	Non	Non	Non
chrY	535078	536578	+	NM_000451_1	None	coding gene	Non	Non	Non	Non	Non	Non	Non	Non	Non	Non	Non	Non	Non	Non	Non	Non	Non	Non	Non	Non
chr13	103717696	103719196	-	NM_000452	SLC10A2	coding gene	Non	Non	Non	Non	Non	Non	Non	Non	Non	Non	Non	Non	Non	Non	Non	Non	Non	Non	Non	Non
chr19	17982781	17984281	+	NM_000453	SLC5A5	coding gene	Non	Non	Sharp	Sharp	Non	Non	Sharp	Non	Sharp	Sharp	Non	Sharp	Non	Non	Non	Non	Sharp	Non	Intermediate	Non
chr21	33031934	33033434	+	NM_000454	SOD1	coding gene	Sharp	Sharp	Sharp	Sharp	Sharp	Intermediate	Sharp	Sharp	Sharp	Intermediate	Sharp	Sharp	Sharp	Broad	Sharp	Intermadiate	Sharp	Sharp	Intermediate	Sharp
chr19	1205797	1207297	+	NM_000455	STK11	coding gene	Intermediate	Intermediate	Intermediate	Intermediate	Sharp	Intermediate	Intermediate	Intermediate	Intermediate	Intermediate	Intermediate	Intermediate	Sharp	Sharp	Intermediate	Broad	Sharp	Intermediate	Intermediate	Intermediate
chr12	56391042	56392542	+	NM_000456	SUOX	coding gene	Non	Sharp	Sharp	Sharp	Sharp	Sharp	Sharp	Sharp	Sharp	Sharp	Non	Non	Sharp	Non	Non	Non	Non	Non	Non	Non
chr20	43029923	43031423	+	NM_000457	HNF4A	coding gene	Non	Non	Non	Non	Non	Non	Non	Non	Non	Non	Non	Non	Non	Non	Non	Non	Non	Non	Non	Non
chr17	36103596	36105096	-	NM_000458	HNF1B	coding gene	Non	Non	Non	Non	Non	Non	Non	Non	Non	Non	Non	Non	Non	Non	Non	Non	Non	Non	Non	Non
chr9	27109146	27110646	+	NM_000459	TEK	coding gene	Non	Non	Non	Non	Non	Non	Non	Non	Non	Non	Non	Non	Non	Non	Non	Non	Non	Non	Non	Non
chr3	184094432	184095932	-	NM_000460	THPO	coding gene	Non	Non	Non	Non	Non	Non	Non	Non	Non	Non	Non	Non	Non	Non	Non	Non	Non	Non	Sharp	Non
chr3	24534813	24536313	-	NM_000461	THRB	coding gene	Non	Non	Non	Non	Non	Non	Sharp	Non	Sharp	Sharp	Non	Non	Non	Non	Non	Non	Non	Non	Non	Non
chr15	25682675	25684175	-	NM_000462	UBE3A	coding gene	Sharp	Sharp	Sharp	Intermediate	Sharp	Intermediate	Sharp	Intermediate	Intermediate	Intermediate	Intermediate	Intermediate	Sharp	Broad	Intermediate	Broad	Intermediate	Intermediate	Broad	Intermediate
chr2	234668918	234670418	+	NM_000463	UGT1A1	coding gene	Non	Non	Non	Non	Non	Non	Non	Non	Non	Non	Non	Non	Non	Non	Non	Non	Non	Non	Non	Non
chr2	215672928	215674428	-	NM_000465	BARD1	coding gene	Intermediate	Intermediate	Intermediate	Intermediate	Intermediate	Broad	Broad	Intermediate	Broad	Broad	Broad	Intermediate	Sharp	Broad	Intermediate	Broad	Intermediate	Intermediate	Broad	Broad
chr7	92156345	92157845	-	NM_000466	PEX1	coding gene	Sharp	Sharp	Sharp	Sharp	Sharp	Intermediate	Sharp	Intermediate	Sharp	Sharp	Sharp	Intermediate	Sharp	Intermediate	Intermediate	Intermadiate	Sharp	Intermediate	Intermediate	Sharp
chr7	19155795	19157295	-	NM_000474	TWIST1	coding gene	Sharp	Sharp	Sharp	Sharp	Non	Non	Sharp	Non	Non	Sharp	Sharp	Sharp	Sharp	Non	Sharp	Non	Non	Sharp	Non	Non
chrX	30325995	30327495	-	NM_000475	NR0B1	coding gene	Non	Non	Non	Non	Non	Non	Sharp	Non	Sharp	Sharp	Non	Sharp	Non	Non	Non	Non	Non	Non	Non	Non
chr9	130638522	130640022	-	NM_000476	AK1	coding gene	Non	Non	Non	Non	Non	Non	Non	Non	Non	Sharp	Non	Sharp	Non	Non	Non	Non	Non	Non	Non	Non
chr4	74269971	74271471	+	NM_000477	ALB	coding gene	Non	Non	Non	Non	Non	Non	Non	Non	Non	Non	Non	Non	Non	Non	Non	Non	Non	Non	Non	Non
chr1	21835857	21837357	+	NM_000478	ALPL	coding gene	Non	Non	Non	Non	Non	Non	Sharp	Non	Sharp	Sharp	Non	Sharp	Non	Non	Non	Non	Non	Non	Non	Non
chr19	2249112	2250612	+	NM_000479	AMH	coding gene	Non	Non	Non	Non	Non	Non	Non	Non	Non	Non	Non	Non	Non	Non	Non	Non	Non	Non	Non	Non
chr11	10472223	10473723	+	NM_000480	AMPD3	coding gene	Sharp	Sharp	Sharp	Sharp	Sharp	Sharp	Sharp	Sharp	Sharp	Sharp	Sharp	Sharp	Sharp	Non	Non	Sharp	Non	Non	Sharp	Sharp
chr3	49458611	49460111	-	NM_000481	AMT	coding gene	Non	Non	Non	Non	Non	Non	Non	Non	Non	Non	Non	Non	Non	Non	Non	Non	Non	Non	Non	Non
chr11	116692511	116694011	-	NM_000482	APOA4	coding gene	Non	Non	Non	Non	Non	Non	Non	Non	Non	Non	Non	Non	Non	Non	Non	Non	Non	Non	Non	Non
chr19	45449238	45450738	+	NM_000483	APOC2	coding gene	Non	Non	Non	Non	Non	Non	Non	Non	Non	Non	Non	Non	Non	Non	Non	Non	Non	Non	Non	Non
chr21	27541638	27543138	-	NM_000484	APP	coding gene	Sharp	Intermediate	Sharp	Sharp	Non	Non	Sharp	Sharp	Sharp	Sharp	Sharp	Sharp	Non	Non	Sharp	Non	Non	Sharp	Sharp	Non
chr16	88876842	88878342	-	NM_000485	APRT	coding gene	Intermediate	Sharp	Sharp	Sharp	Sharp	Intermediate	Sharp	Intermediate	Sharp	Sharp	Sharp	Intermediate	Sharp	Broad	Intermediate	Sharp	Intermediate	Sharp	Intermediate	Intermediate
chr12	50344523	50346023	+	NM_000486	AQP2	coding gene	Non	Non	Non	Non	Non	Non	Non	Non	Non	Non	Non	Non	Non	Non	Non	Non	Non	Non	Non	Non
chr22	51065101	51066601	-	NM_000487	ARSA	coding gene	Sharp	Sharp	Sharp	Sharp	Sharp	Sharp	Sharp	Sharp	Sharp	Sharp	Sharp	Sharp	Sharp	Sharp	Sharp	Sharp	Sharp	Sharp	Intermediate	Sharp
chr1	173885016	173886516	-	NM_000488	SERPINC1	coding gene	Non	Non	Non	Non	Non	Non	Non	Non	Non	Non	Non	Non	Non	Non	Non	Non	Non	Non	Non	Non
chrX	77040219	77041719	-	NM_000489	ATRX	coding gene	Sharp	Intermediate	Intermediate	Sharp	Sharp	Intermediate	Sharp	Broad	Sharp	Intermediate	Sharp	Sharp	Sharp	Broad	Sharp	Broad	Intermediate	Sharp	Broad	Intermediate
chr20	3063870	3065370	-	NM_000490	AVP	coding gene	Non	Sharp	Sharp	Sharp	Non	Non	Sharp	Non	Sharp	Sharp	Non	Sharp	Non	Non	Non	Non	Non	Non	Non	Non
chr1	22979681	22981181	+	NM_000491	C1QB	coding gene	Non	Non	Non	Non	Non	Non	Non	Non	Non	Non	Non	Non	Non	Non	Non	Non	Non	Non	Non	Non
chr7	117120016	117121516	+	NM_000492	CFTR	coding gene	Sharp	Non	Sharp	Sharp	Non	Non	Sharp	Non	Non	Non	Non	Non	Non	Non	Non	Non	Non	Non	Non	Non
chr6	116445796	116447296	-	NM_000493	COL10A1	coding gene	Non	Non	Non	Non	Non	Non	Non	Non	Non	Non	Non	Non	Non	Non	Non	Non	Non	Non	Non	Non
chr10	105844138	105845638	-	NM_000494	COL17A1	coding gene	Non	Non	Non	Non	Non	Non	Non	Non	Non	Non	Non	Non	Non	Non	Non	Non	Non	Non	Non	Non
chrX	107683073	107684573	+	NM_000495	COL4A5	coding gene	Sharp	Sharp	Sharp	Sharp	Non	Non	Non	Non	Sharp	Intermediate	Non	Non	Non	Non	Non	Non	Non	Sharp	Non	Non
chr22	25615611	25617111	+	NM_000496	CRYBB2	coding gene	Non	Non	Non	Non	Non	Non	Non	Non	Non	Non	Non	Non	Non	Non	Non	Non	Non	Non	Non	Non
chr8	143959736	143961236	-	NM_000497	CYP11B1	coding gene	Non	Non	Non	Non	Non	Non	Non	Non	Non	Non	Non	Non	Non	Non	Non	Non	Non	Non	Non	Non
chr8	143997759	143999259	-	NM_000498	CYP11B2	coding gene	Non	Non	Non	Non	Non	Non	Non	Non	Non	Non	Non	Non	Non	Non	Non	Non	Non	Non	Non	Non
chr15	75016377	75017877	-	NM_000499	CYP1A1	coding gene	Non	Non	Non	Non	Non	Non	Non	Non	Non	Sharp	Non	Non	Non	Non	Sharp	Non	Non	Sharp	Non	Non
chr6	31973358	31974858	+	NM_000500_3	None	coding gene	Non	Non	Non	Non	Non	Non	Non	Non	Non	Non	Non	Non	Non	Non	Non	Non	Non	Non	Non	Non
chr6	32006092	32007592	+	NM_000500_4	None	coding gene	Non	Non	Non	Non	Non	Non	Non	Non	Non	Non	Non	Non	Non	Non	Non	Non	Non	Non	Non	Non
chr7	73442426	73443926	+	NM_000501	ELN	coding gene	Non	Non	Non	Non	Non	Non	Non	Sharp	Non	Non	Non	Non	Non	Non	Non	Sharp	Non	Non	Non	Non
chr17	56270088	56271588	+	NM_000502	EPX	coding gene	Non	Non	Non	Non	Non	Non	Non	Non	Non	Non	Non	Non	Non	Non	Non	Non	Non	Non	Non	Non
chr8	72272967	72274467	-	NM_000503	EYA1	coding gene	Non	Non	Non	Non	Non	Non	Non	Non	Non	Non	Non	Non	Non	Non	Sharp	Non	Non	Sharp	Non	Non
chr13	113777112	113778612	+	NM_000504	F10	coding gene	Non	Non	Non	Non	Non	Non	Non	Non	Non	Non	Non	Non	Non	Non	Non	Non	Non	Non	Non	Non
chr5	176835077	176836577	-	NM_000505	F12	coding gene	Non	Non	Non	Non	Non	Non	Non	Non	Non	Non	Non	Non	Non	Non	Non	Non	Non	Non	Non	Non
chr11	46740742	46742242	+	NM_000506	F2	coding gene	Non	Non	Non	Non	Non	Non	Non	Non	Non	Non	Non	Non	Non	Non	Non	Non	Non	Non	Non	Non
chr9	97400423	97401923	-	NM_000507	FBP1	coding gene	Sharp	Sharp	Sharp	Sharp	Non	Sharp	Sharp	Sharp	Sharp	Sharp	Sharp	Sharp	Sharp	Non	Sharp	Non	Non	Sharp	Sharp	Non
chr4	155510397	155511897	-	NM_000508	FGA	coding gene	Non	Non	Non	Non	Non	Non	Non	Non	Non	Non	Non	Non	Non	Non	Non	Non	Non	Non	Non	Non
chr4	155532402	155533902	-	NM_000509	FGG	coding gene	Non	Non	Non	Non	Non	Non	Non	Non	Non	Non	Non	Non	Non	Non	Non	Non	Non	Non	Non	Non
chr11	30252562	30254062	+	NM_000510	FSHB	coding gene	Non	Non	Non	Non	Non	Non	Non	Non	Non	Non	Non	Non	Non	Non	Non	Non	Non	Non	Non	Non
chr19	49199227	49200727	+	NM_000511	FUT2	coding gene	Non	Non	Sharp	Sharp	Non	Sharp	Sharp	Sharp	Sharp	Sharp	Sharp	Sharp	Sharp	Non	Non	Non	Non	Non	Sharp	Non
chr16	88921874	88923374	-	NM_000512	GALNS	coding gene	Sharp	Sharp	Sharp	Sharp	Sharp	Sharp	Sharp	Intermediate	Sharp	Sharp	Sharp	Sharp	Sharp	Sharp	Sharp	Sharp	Sharp	Sharp	Intermediate	Sharp
chrX	153448084	153449584	+	NM_000513	OPN1MW	coding gene	Non	Non	Non	Non	Non	Non	Non	Non	Non	Non	Non	Non	Non	Non	Non	Non	Non	Non	Non	Non
chrX	153485202	153486702	+	NM_000513_1	None	coding gene	Non	Non	Non	Non	Non	Non	Non	Non	Non	Non	Non	Non	Non	Non	Non	Non	Non	Non	Non	Non
chr5	37838282	37839782	-	NM_000514	GDNF	coding gene	Non	Non	Non	Non	Non	Non	Sharp	Non	Non	Sharp	Non	Non	Non	Non	Sharp	Non	Non	Non	Non	Non
chr17	61994698	61996198	-	NM_000515	GH1	coding gene	Non	Non	Non	Non	Non	Non	Non	Non	Non	Non	Non	Non	Non	Non	Non	Non	Non	Non	Non	Non
chr20	57466425	57467925	+	NM_000516	GNAS	coding gene	Broad	Broad	Broad	Broad	Sharp	Broad	Broad	Broad	Broad	Broad	Broad	Broad	Broad	Broad	Broad	Broad	Broad	Broad	Broad	Broad
chr16	222845	224345	+	NM_000517	HBA2	coding gene	Non	Non	Sharp	Sharp	Non	Non	Sharp	Non	Non	Sharp	Sharp	Sharp	Non	Non	Non	Non	Non	Non	Sharp	Non
chr11	5246801	5248301	-	NM_000518	HBB	coding gene	Non	Non	Non	Non	Non	Non	Non	Non	Non	Sharp	Non	Non	Non	Non	Non	Non	Non	Non	Non	Non
chr11	5254358	5255858	-	NM_000519	HBD	coding gene	Non	Non	Non	Non	Non	Non	Sharp	Non	Non	Sharp	Non	Non	Non	Non	Non	Sharp	Non	Non	Non	Non
chr15	72667020	72668520	-	NM_000520	HEXA	coding gene	Sharp	Sharp	Sharp	Sharp	Sharp	Sharp	Sharp	Intermediate	Sharp	Sharp	Sharp	Sharp	Sharp	Sharp	Sharp	Sharp	Sharp	Sharp	Sharp	Sharp
chr5	73980968	73982468	+	NM_000521	HEXB	coding gene	Sharp	Sharp	Sharp	Sharp	Sharp	Sharp	Sharp	Sharp	Sharp	Sharp	Sharp	Sharp	Sharp	Sharp	Sharp	Sharp	Sharp	Sharp	Sharp	Sharp
chr7	27238225	27239725	-	NM_000522	HOXA13	coding gene	Sharp	Sharp	Sharp	Sharp	Broad	Non	Sharp	Non	Sharp	Sharp	Sharp	Sharp	Sharp	Sharp	Sharp	Broad	Sharp	Sharp	Sharp	Non
chr2	176957531	176959031	+	NM_000523	HOXD13	coding gene	Non	Non	Sharp	Sharp	Non	Non	Sharp	Non	Sharp	Sharp	Non	Sharp	Sharp	Broad	Sharp	Non	Non	Sharp	Sharp	Sharp
chr5	63256046	63257546	-	NM_000524	HTR1A	coding gene	Non	Non	Non	Non	Non	Non	Non	Non	Non	Non	Non	Non	Non	Non	Non	Non	Non	Non	Non	Non
chr11	17408706	17410206	-	NM_000525	KCNJ11	coding gene	Non	Non	Non	Non	Sharp	Non	Non	Non	Non	Non	Non	Non	Non	Broad	Non	Non	Intermediate	Non	Sharp	Broad
chr17	39741647	39743147	-	NM_000526	KRT14	coding gene	Non	Non	Non	Non	Non	Non	Non	Non	Non	Non	Non	Non	Non	Non	Non	Non	Non	Non	Non	Non
chr19	11200037	11201537	+	NM_000527	LDLR	coding gene	Sharp	Sharp	Sharp	Sharp	Sharp	Intermediate	Intermediate	Intermediate	Intermediate	Intermediate	Intermediate	Intermediate	Sharp	Intermediate	Intermediate	Broad	Intermediate	Intermediate	Intermediate	Broad
chr19	12776091	12777591	-	NM_000528	MAN2B1	coding gene	Sharp	Sharp	Sharp	Sharp	Sharp	Sharp	Sharp	Sharp	Sharp	Sharp	Sharp	Sharp	Sharp	Broad	Sharp	Broad	Sharp	Broad	Broad	Sharp
chr18	13914035	13915535	-	NM_000529	MC2R	coding gene	Non	Non	Non	Non	Non	Non	Non	Non	Non	Non	Non	Non	Non	Non	Non	Non	Non	Non	Non	Non
chr1	161278262	161279762	-	NM_000530	MPZ	coding gene	Non	Non	Non	Non	Non	Non	Non	Non	Non	Non	Non	Non	Non	Non	Non	Non	Non	Non	Non	Non
chrX	38211735	38213235	+	NM_000531	OTC	coding gene	Non	Non	Non	Non	Non	Non	Non	Non	Non	Non	Non	Non	Non	Non	Non	Non	Non	Non	Non	Non
chr3	135969166	135970666	+	NM_000532	PCCB	coding gene	Sharp	Sharp	Sharp	Sharp	Sharp	Sharp	Sharp	Sharp	Sharp	Sharp	Sharp	Sharp	Sharp	Sharp	Sharp	Sharp	Sharp	Sharp	Intermediate	Sharp
chrX	103031753	103033253	+	NM_000533	PLP1	coding gene	Non	Non	Non	Non	Non	Non	Non	Non	Non	Non	Non	Non	Non	Non	Non	Non	Non	Non	Non	Non
chr2	190648810	190650310	+	NM_000534	PMS1	coding gene	Intermediate	Sharp	Intermediate	Sharp	Intermediate	Intermediate	Intermediate	Intermediate	Intermediate	Intermediate	Sharp	Intermediate	Sharp	Intermediate	Intermediate	Broad	Intermediate	Intermediate	Intermediate	Intermediate
chr7	6047237	6048737	-	NM_000535	PMS2	coding gene	Sharp	Sharp	Sharp	Sharp	Sharp	Sharp	Sharp	Sharp	Sharp	Sharp	Sharp	Sharp	Sharp	Intermediate	Intermediate	Intermadiate	Intermediate	Sharp	Intermediate	Sharp
chr11	36618329	36619829	-	NM_000536	RAG2	coding gene	Broad	Broad	Intermediate	Sharp	Non	Broad	Sharp	Broad	Broad	Broad	Sharp	Sharp	Non	Broad	Sharp	Intermadiate	Sharp	Non	Intermediate	Sharp
chr1	204133965	204135465	-	NM_000537	REN	coding gene	Non	Non	Non	Non	Non	Non	Non	Non	Non	Non	Non	Non	Non	Non	Non	Non	Non	Non	Non	Non
chr13	37393338	37394838	+	NM_000538	RFXAP	coding gene	Intermediate	Sharp	Intermediate	Sharp	Sharp	Intermediate	Sharp	Broad	Sharp	Sharp	Sharp	Sharp	Sharp	Broad	Intermediate	Broad	Sharp	Broad	Broad	Broad
chr3	129247481	129248981	+	NM_000539	RHO	coding gene	Non	Non	Non	Non	Non	Non	Non	Non	Non	Non	Non	Non	Non	Non	Non	Non	Non	Non	Non	Non
chr19	38924339	38925839	+	NM_000540	RYR1	coding gene	Non	Non	Non	Non	Non	Non	Non	Non	Non	Non	Non	Non	Non	Non	Non	Non	Non	Non	Non	Non
chr2	234216308	234217808	+	NM_000541	SAG	coding gene	Non	Non	Non	Non	Non	Non	Non	Non	Non	Non	Non	Non	Non	Non	Non	Non	Non	Non	Non	Non
chr2	85894364	85895864	-	NM_000542	SFTPB	coding gene	Non	Non	Non	Non	Non	Non	Non	Non	Non	Non	Non	Non	Non	Non	Non	Non	Non	Non	Non	Non
chr11	6411643	6413143	+	NM_000543	SMPD1	coding gene	Sharp	Intermediate	Intermediate	Intermediate	Sharp	Sharp	Sharp	Sharp	Sharp	Sharp	Sharp	Sharp	Sharp	Sharp	Sharp	Sharp	Sharp	Sharp	Sharp	Sharp
chr6	32805047	32806547	-	NM_000544_6	None	coding gene	Sharp	Sharp	Sharp	Sharp	Sharp	Sharp	Sharp	Sharp	Sharp	Sharp	Sharp	Sharp	Sharp	Sharp	Sharp	Broad	Sharp	Sharp	Sharp	Sharp
chr12	121416548	121418048	+	NM_000545	HNF1A	coding gene	Non	Non	Non	Non	Non	Non	Non	Non	Non	Non	Non	Non	Non	Non	Non	Non	Non	Non	Non	Non
chr17	7589368	7590868	-	NM_000546	TP53	coding gene	Broad	Broad	Broad	Broad	Intermediate	Broad	Broad	Broad	Broad	Broad	Broad	Intermediate	Sharp	Broad	Broad	Broad	Intermediate	Broad	Broad	Intermediate
chr2	1417232	1418732	+	NM_000547	TPO	coding gene	Non	Non	Non	Non	Non	Non	Non	Non	Non	Non	Non	Non	Non	Non	Non	Non	Non	Non	Non	Non
chr16	2097989	2099489	+	NM_000548	TSC2	coding gene	Sharp	Sharp	Sharp	Sharp	Sharp	Sharp	Sharp	Sharp	Sharp	Sharp	Sharp	Intermediate	Sharp	Sharp	Sharp	Sharp	Sharp	Sharp	Intermediate	Sharp
chr1	115572414	115573914	+	NM_000549	TSHB	coding gene	Non	Non	Non	Non	Non	Non	Non	Non	Non	Non	Non	Non	Non	Non	Non	Non	Non	Non	Non	Non
chr9	12693385	12694885	+	NM_000550	TYRP1	coding gene	Non	Non	Non	Non	Non	Non	Non	Non	Non	Non	Non	Non	Non	Non	Non	Non	Non	Non	Non	Non
chr3	10183318	10184818	+	NM_000551	VHL	coding gene	Sharp	Intermediate	Broad	Intermediate	Sharp	Intermediate	Sharp	Sharp	Sharp	Sharp	Sharp	Sharp	Sharp	Broad	Intermediate	Broad	Sharp	Intermediate	Intermediate	Broad
chr12	6232336	6233836	-	NM_000552	VWF	coding gene	Non	Non	Non	Non	Non	Non	Non	Non	Non	Non	Non	Non	Non	Non	Non	Sharp	Non	Non	Non	Non
chr8	30890777	30892277	+	NM_000553	WRN	coding gene	Sharp	Sharp	Sharp	Sharp	Sharp	Intermediate	Intermediate	Sharp	Sharp	Intermediate	Intermediate	Intermediate	Sharp	Broad	Intermediate	Broad	Sharp	Sharp	Intermediate	Sharp
chr19	48325098	48326598	+	NM_000554	CRX	coding gene	Non	Non	Non	Non	Non	Non	Non	Non	Non	Non	Non	Non	Non	Non	Non	Non	Non	Non	Non	Non
chrX	110652874	110654374	-	NM_000555	DCX	coding gene	Non	Non	Non	Non	Non	Non	Non	Non	Non	Non	Non	Non	Non	Non	Non	Non	Non	Non	Non	Non
chr20	34024527	34026027	-	NM_000557	GDF5	coding gene	Non	Non	Non	Non	Non	Non	Non	Non	Non	Non	Non	Non	Non	Non	Non	Non	Non	Non	Non	Non
chr16	226678	228178	+	NM_000558	HBA1	coding gene	Non	Non	Sharp	Sharp	Non	Non	Sharp	Non	Sharp	Sharp	Sharp	Sharp	Non	Non	Non	Non	Non	Non	Sharp	Non
chr11	5269587	5271087	-	NM_000559	HBG1	coding gene	Non	Non	Non	Non	Non	Non	Non	Non	Non	Non	Non	Non	Non	Non	Non	Non	Non	Non	Non	Non
chr1	111415721	111417221	+	NM_000560	CD53	coding gene	Intermediate	Intermediate	Broad	Broad	Intermediate	Intermediate	Broad	Broad	Broad	Broad	Broad	Broad	Sharp	Intermediate	Intermediate	Broad	Intermediate	Intermediate	Intermediate	Broad
chr1	110230417	110231917	+	NM_000561	GSTM1	coding gene	Non	Non	Non	Non	Sharp	Sharp	Sharp	Sharp	Non	Non	Sharp	Non	Non	Non	Sharp	Sharp	Non	Non	Non	Sharp
chr1	57320442	57321942	+	NM_000562	C8A	coding gene	Non	Non	Non	Non	Non	Non	Non	Non	Non	Non	Non	Non	Non	Non	Non	Non	Non	Non	Non	Non
chr3	3150558	3152058	-	NM_000564	IL5RA	coding gene	Non	Non	Non	Non	Non	Non	Non	Non	Non	Non	Non	Non	Non	Non	Non	Non	Non	Non	Non	Non
chr1	154377668	154379168	+	NM_000565	IL6R	coding gene	Sharp	Sharp	Intermediate	Sharp	Sharp	Intermediate	Intermediate	Intermediate	Intermediate	Intermediate	Sharp	Sharp	Sharp	Non	Sharp	Sharp	Sharp	Sharp	Sharp	Sharp
chr1	149754249	149755749	+	NM_000566	FCGR1A	coding gene	Non	Non	Non	Non	Non	Non	Non	Sharp	Non	Sharp	Non	Non	Non	Non	Non	Non	Non	Non	Non	Non
chr1	159682879	159684379	-	NM_000567	CRP	coding gene	Non	Non	Non	Non	Non	Non	Non	Non	Non	Non	Non	Non	Non	Non	Non	Non	Non	Non	Non	Non
chr1	161518318	161519818	-	NM_000569	FCGR3A	coding gene	Non	Non	Non	Non	Non	Non	Sharp	Sharp	Sharp	Sharp	Non	Non	Non	Non	Non	Non	Non	Non	Non	Non
chr1	161600253	161601753	-	NM_000570	FCGR3B	coding gene	Non	Non	Non	Non	Non	Non	Sharp	Non	Sharp	Sharp	Non	Non	Non	Non	Non	Non	Non	Non	Non	Non
chr1	206944339	206945839	-	NM_000572	IL10	coding gene	Non	Non	Non	Non	Non	Non	Sharp	Sharp	Non	Sharp	Non	Sharp	Non	Sharp	Sharp	Sharp	Non	Sharp	Intermediate	Non
chr1	207669472	207670972	+	NM_000573	CR1	coding gene	Sharp	Sharp	Sharp	Sharp	Sharp	Intermediate	Sharp	Sharp	Sharp	Sharp	Sharp	Sharp	Sharp	Sharp	Non	Non	Sharp	Non	Non	Non
chr1	207494816	207496316	+	NM_000574	CD55	coding gene	Sharp	Sharp	Intermediate	Intermediate	Sharp	Sharp	Intermediate	Intermediate	Intermediate	Intermediate	Sharp	Sharp	Sharp	Sharp	Sharp	Intermadiate	Sharp	Sharp	Sharp	Sharp
chr2	113541471	113542971	-	NM_000575	IL1A	coding gene	Non	Non	Non	Non	Non	Non	Non	Sharp	Non	Non	Non	Non	Non	Non	Non	Non	Non	Non	Non	Non
chr2	113592856	113594356	-	NM_000576	IL1B	coding gene	Non	Non	Non	Non	Sharp	Non	Sharp	Intermediate	Sharp	Sharp	Non	Non	Non	Non	Non	Non	Non	Non	Non	Non
chr2	113875469	113876969	+	NM_000577	IL1RN	coding gene	Non	Non	Non	Non	Non	Non	Non	Non	Non	Non	Non	Non	Non	Non	Non	Non	Non	Non	Non	Non
chr2	219246751	219248251	+	NM_000578	SLC11A1	coding gene	Non	Non	Non	Non	Sharp	Non	Sharp	Sharp	Sharp	Sharp	Non	Non	Non	Non	Non	Non	Non	Non	Non	Non
chr3	46411632	46413132	+	NM_000579	CCR5	coding gene	Non	Non	Non	Non	Non	Non	Non	Sharp	Non	Non	Non	Non	Non	Sharp	Sharp	Non	Non	Non	Sharp	Non
chr3	49394291	49395791	-	NM_000581	GPX1	coding gene	Sharp	Sharp	Sharp	Sharp	Sharp	Sharp	Sharp	Sharp	Sharp	Sharp	Sharp	Sharp	Sharp	Sharp	Sharp	Sharp	Sharp	Sharp	Intermediate	Sharp
chr4	88896801	88898301	+	NM_000582	SPP1	coding gene	Non	Non	Non	Non	Non	Sharp	Non	Sharp	Non	Sharp	Non	Sharp	Non	Sharp	Sharp	Sharp	Non	Sharp	Non	Non
chr4	72648579	72650079	-	NM_000583	GC	coding gene	Non	Non	Non	Non	Non	Non	Non	Non	Non	Non	Non	Non	Non	Non	Non	Non	Non	Non	Non	Non
chr4	74606222	74607722	+	NM_000584	CXCL8	coding gene	Non	Non	Non	Non	Non	Sharp	Sharp	Intermediate	Non	Sharp	Non	Non	Non	Non	Non	Non	Non	Non	Non	Non
chr4	142557748	142559248	+	NM_000585	IL15	coding gene	Sharp	Sharp	Sharp	Sharp	Sharp	Sharp	Sharp	Sharp	Sharp	Sharp	Sharp	Sharp	Sharp	Sharp	Sharp	Sharp	Sharp	Sharp	Sharp	Sharp
chr4	123376150	123377650	-	NM_000586	IL2	coding gene	Non	Non	Non	Non	Non	Non	Non	Non	Sharp	Non	Non	Non	Non	Non	Non	Non	Non	Non	Non	Non
chr5	40909598	40911098	+	NM_000587	C7	coding gene	Non	Non	Non	Non	Non	Non	Non	Non	Non	Non	Non	Non	Non	Non	Non	Non	Non	Non	Non	Non
chr5	131396346	131397846	+	NM_000588	IL3	coding gene	Non	Non	Non	Non	Non	Non	Non	Non	Non	Non	Non	Non	Non	Non	Non	Non	Non	Non	Non	Non
chr5	132009372	132010872	+	NM_000589	IL4	coding gene	Non	Non	Non	Non	Non	Non	Non	Non	Non	Sharp	Non	Non	Non	Non	Non	Non	Intermediate	Non	Non	Non
chr5	135230016	135231516	-	NM_000590	IL9	coding gene	Non	Non	Non	Non	Non	Non	Non	Non	Non	Non	Non	Non	Non	Non	Non	Non	Non	Non	Non	Non
chr5	140011535	140013035	-	NM_000591	CD14	coding gene	Non	Sharp	Sharp	Sharp	Non	Sharp	Intermediate	Sharp	Sharp	Intermediate	Sharp	Sharp	Non	Non	Non	Non	Non	Non	Non	Non
chr6	32820248	32821748	-	NM_000593_4	None	coding gene	Intermediate	Intermediate	Intermediate	Broad	Sharp	Broad	Intermediate	Intermediate	Intermediate	Intermediate	Intermediate	Intermediate	Sharp	Intermediate	Sharp	Broad	Intermediate	Sharp	Intermediate	Intermediate
chr6	31543349	31544849	+	NM_000594	TNF	coding gene	Non	Sharp	Sharp	Non	Non	Sharp	Sharp	Sharp	Sharp	Sharp	Sharp	Non	Sharp	Sharp	Non	Sharp	Sharp	Sharp	Intermediate	Broad
chr6	31540092	31541592	+	NM_000595_3	None	coding gene	Sharp	Sharp	Sharp	Sharp	Non	Sharp	Sharp	Non	Sharp	Sharp	Sharp	Sharp	Non	Non	Sharp	Non	Sharp	Non	Sharp	Intermediate
chr7	45927958	45929458	+	NM_000596	IGFBP1	coding gene	Non	Non	Non	Non	Non	Non	Non	Non	Non	Sharp	Non	Non	Non	Non	Non	Non	Non	Non	Non	Non
chr2	217498126	217499626	+	NM_000597	IGFBP2	coding gene	Sharp	Intermediate	Broad	Broad	Sharp	Sharp	Sharp	Sharp	Broad	Sharp	Intermediate	Sharp	Sharp	Broad	Intermediate	Broad	Intermediate	Intermediate	Intermediate	Sharp
chr7	45959371	45960871	-	NM_000598	IGFBP3	coding gene	Non	Non	Sharp	Non	Non	Non	Sharp	Non	Sharp	Sharp	Sharp	Sharp	Non	Non	Non	Non	Non	Sharp	Non	Non
chr2	217558772	217560272	-	NM_000599	IGFBP5	coding gene	Intermediate	Intermediate	Broad	Intermediate	Sharp	Broad	Broad	Sharp	Intermediate	Broad	Broad	Broad	Sharp	Sharp	Intermediate	Sharp	Sharp	Intermediate	Intermediate	Intermediate
chr7	22766765	22768265	+	NM_000600	IL6	coding gene	Non	Non	Non	Non	Sharp	Non	Sharp	Sharp	Non	Sharp	Sharp	Sharp	Non	Sharp	Sharp	Sharp	Non	Sharp	Non	Non
chr7	81397952	81399452	-	NM_000601	HGF	coding gene	Non	Sharp	Sharp	Non	Non	Sharp	Sharp	Broad	Sharp	Sharp	Non	Non	Non	Non	Non	Non	Non	Non	Non	Non
chr7	100770378	100771878	+	NM_000602	SERPINE1	coding gene	Non	Non	Non	Sharp	Sharp	Sharp	Sharp	Sharp	Non	Intermediate	Sharp	Sharp	Non	Sharp	Sharp	Sharp	Sharp	Sharp	Sharp	Sharp
chr7	150688143	150689643	+	NM_000603	NOS3	coding gene	Non	Non	Non	Non	Non	Non	Non	Non	Non	Non	Non	Non	Non	Non	Non	Non	Non	Non	Non	Non
chr9	21383896	21385396	-	NM_000605	IFNA2	coding gene	Non	Non	Non	Non	Non	Non	Non	Non	Non	Non	Non	Non	Non	Non	Non	Non	Non	Non	Non	Non
chr9	139839697	139841197	+	NM_000606	C8G	coding gene	Non	Non	Non	Non	Non	Non	Non	Non	Non	Non	Non	Non	Non	Sharp	Sharp	Sharp	Non	Non	Non	Sharp
chr9	117085302	117086802	+	NM_000607	ORM1	coding gene	Non	Non	Non	Non	Non	Non	Non	Non	Non	Non	Non	Non	Non	Non	Non	Non	Non	Non	Non	Non
chr9	117092068	117093568	+	NM_000608	ORM2	coding gene	Non	Non	Non	Non	Non	Non	Non	Non	Non	Non	Non	Non	Non	Non	Non	Non	Non	Non	Non	Non
chr10	44879045	44880545	-	NM_000609	CXCL12	coding gene	Non	Non	Non	Non	Non	Non	Sharp	Non	Non	Sharp	Sharp	Sharp	Non	Non	Sharp	Non	Non	Sharp	Non	Non
chr11	35160416	35161916	+	NM_000610	CD44	coding gene	Sharp	Broad	Broad	Broad	Sharp	Sharp	Intermediate	Broad	Intermediate	Intermediate	Intermediate	Intermediate	Sharp	Broad	Non	Broad	Sharp	Intermediate	Intermediate	Sharp
chr11	33756525	33758025	-	NM_000611	CD59	coding gene	Sharp	Sharp	Sharp	Sharp	Sharp	Sharp	Sharp	Sharp	Sharp	Sharp	Sharp	Sharp	Sharp	Sharp	Sharp	Broad	Sharp	Sharp	Intermediate	Sharp
chr11	2158704	2160204	-	NM_000612	IGF2	coding gene	Non	Non	Sharp	Sharp	Non	Non	Non	Non	Non	Sharp	Non	Non	Non	Non	Non	Non	Non	Non	Non	Non
chr11	6460754	6462254	-	NM_000613	HPX	coding gene	Non	Non	Non	Non	Non	Non	Non	Non	Non	Non	Non	Non	Non	Non	Non	Non	Non	Non	Non	Non
chr11	58390145	58391645	+	NM_000614	CNTF	coding gene	Non	Non	Non	Non	Non	Non	Non	Non	Non	Non	Non	Non	Non	Non	Non	Non	Non	Non	Non	Non
chr11	112831968	112833468	+	NM_000615	NCAM1	coding gene	Non	Sharp	Sharp	Sharp	Non	Non	Sharp	Non	Sharp	Sharp	Sharp	Sharp	Non	Non	Sharp	Non	Sharp	Sharp	Sharp	Non
chr12	6898637	6900137	+	NM_000616	CD4	coding gene	Broad	Broad	Broad	Non	Non	Broad	Sharp	Sharp	Sharp	Intermediate	Non	Sharp	Non	Non	Sharp	Sharp	Intermediate	Non	Intermediate	Intermediate
chr12	51418699	51420199	-	NM_000617	SLC11A2	coding gene	Intermediate	Sharp	Intermediate	Sharp	Sharp	Broad	Intermediate	Sharp	Intermediate	Intermediate	Intermediate	Sharp	Sharp	Sharp	Intermediate	Broad	Sharp	Intermediate	Broad	Intermediate
chr12	102872878	102874378	-	NM_000618	IGF1	coding gene	Non	Non	Non	Non	Non	Non	Non	Non	Non	Sharp	Sharp	Sharp	Non	Non	Sharp	Sharp	Sharp	Non	Non	Non
chr12	68552021	68553521	-	NM_000619	IFNG	coding gene	Non	Non	Non	Non	Non	Non	Non	Non	Non	Non	Non	Non	Non	Non	Non	Non	Non	Non	Non	Non
chr12	117798107	117799607	-	NM_000620	NOS1	coding gene	Non	Non	Non	Non	Non	Non	Non	Non	Non	Non	Non	Non	Non	Non	Non	Non	Non	Non	Non	Non
chr13	47469711	47471211	-	NM_000621	HTR2A	coding gene	Non	Sharp	Non	Non	Sharp	Sharp	Sharp	Sharp	Non	Sharp	Sharp	Sharp	Non	Non	Non	Sharp	Non	Sharp	Non	Non
chr14	96671134	96672634	+	NM_000623	BDKRB2	coding gene	Non	Non	Non	Non	Non	Non	Non	Non	Non	Non	Non	Non	Non	Non	Non	Non	Non	Non	Non	Non
chr14	95047730	95049230	+	NM_000624	SERPINA5	coding gene	Non	Non	Non	Non	Non	Non	Non	Non	Non	Non	Non	Non	Non	Non	Non	Non	Non	Non	Non	Non
chr17	26126055	26127555	-	NM_000625	NOS2	coding gene	Non	Non	Non	Non	Non	Non	Non	Non	Non	Non	Non	Non	Non	Non	Non	Non	Non	Non	Non	Non
chr17	62008204	62009704	-	NM_000626	CD79B	coding gene	Non	Sharp	Sharp	Sharp	Sharp	Sharp	Sharp	Sharp	Sharp	Sharp	Sharp	Sharp	Non	Sharp	Non	Intermadiate	Sharp	Sharp	Sharp	Sharp
chr2	33359663	33361163	+	NM_000627	LTBP1	coding gene	Non	Non	Non	Non	Non	Non	Non	Non	Non	Non	Non	Non	Non	Non	Non	Non	Non	Non	Non	Non
chr21	34638671	34640171	+	NM_000628	IL10RB	coding gene	Sharp	Sharp	Sharp	Sharp	Sharp	Sharp	Sharp	Sharp	Sharp	Sharp	Sharp	Sharp	Sharp	Sharp	Sharp	Sharp	Sharp	Sharp	Sharp	Sharp
chr21	34697213	34698713	+	NM_000629	IFNAR1	coding gene	Intermediate	Intermediate	Intermediate	Intermediate	Sharp	Intermediate	Intermediate	Intermediate	Intermediate	Intermediate	Sharp	Intermediate	Sharp	Intermediate	Sharp	Broad	Sharp	Intermediate	Intermediate	Intermediate
chr22	37257029	37258529	+	NM_000631	NCF4	coding gene	Non	Non	Non	Non	Sharp	Non	Sharp	Sharp	Sharp	Sharp	Non	Non	Non	Non	Non	Non	Non	Non	Non	Non
chr16	31271287	31272787	+	NM_000632	ITGAM	coding gene	Non	Non	Non	Non	Non	Non	Sharp	Sharp	Sharp	Sharp	Non	Non	Non	Non	Non	Non	Non	Non	Non	Non
chr18	60985113	60986613	-	NM_000633	BCL2	coding gene	Intermediate	Broad	Broad	Broad	Broad	Broad	Broad	Broad	Intermediate	Broad	Intermediate	Intermediate	Intermediate	Broad	Sharp	Broad	Broad	Intermediate	Broad	Broad
chr2	219030216	219031716	-	NM_000634	CXCR1	coding gene	Non	Non	Non	Non	Non	Non	Sharp	Sharp	Sharp	Sharp	Non	Non	Non	Non	Non	Non	Non	Non	Non	Non
chr19	6109164	6110664	-	NM_000635	RFX2	coding gene	Intermediate	Intermediate	Intermediate	Intermediate	Sharp	Sharp	Intermediate	Intermediate	Sharp	Intermediate	Intermediate	Intermediate	Sharp	Sharp	Sharp	Sharp	Sharp	Sharp	Intermediate	Sharp
chr6	160112853	160114353	-	NM_000636	SOD2	coding gene	Intermediate	Sharp	Sharp	Sharp	Sharp	Broad	Broad	Broad	Intermediate	Intermediate	Intermediate	Intermediate	Sharp	Intermediate	Sharp	Broad	Sharp	Intermediate	Intermediate	Intermediate
chr8	30583986	30585486	-	NM_000637	GSR	coding gene	Sharp	Sharp	Sharp	Sharp	Sharp	Sharp	Sharp	Sharp	Sharp	Sharp	Sharp	Sharp	Sharp	Sharp	Sharp	Broad	Sharp	Sharp	Broad	Broad
chr17	26695873	26697373	-	NM_000638	VTN	coding gene	Non	Non	Non	Non	Non	Non	Non	Non	Non	Non	Non	Non	Non	Non	Non	Non	Non	Non	Non	Non
chr1	172628184	172629684	+	NM_000639	FASLG	coding gene	Non	Non	Non	Non	Non	Non	Non	Non	Non	Sharp	Non	Non	Non	Non	Non	Non	Non	Non	Non	Non
chrX	114250707	114252207	-	NM_000640	IL13RA2	coding gene	Non	Non	Non	Non	Non	Non	Non	Non	Non	Non	Non	Non	Non	Non	Non	Non	Non	Non	Non	Non
chr19	55880314	55881814	-	NM_000641	IL11	coding gene	Non	Sharp	Sharp	Sharp	Non	Non	Non	Non	Non	Sharp	Non	Sharp	Non	Non	Non	Non	Non	Non	Non	Non
chr1	100315639	100317139	+	NM_000642	AGL	coding gene	Sharp	Sharp	Sharp	Sharp	Sharp	Sharp	Sharp	Intermediate	Sharp	Sharp	Sharp	Sharp	Sharp	Sharp	Sharp	Intermadiate	Sharp	Sharp	Intermediate	Sharp
chr1	100316044	100317544	+	NM_000643	AGL	coding gene	Sharp	Sharp	Sharp	Sharp	Sharp	Sharp	Sharp	Intermediate	Sharp	Sharp	Sharp	Sharp	Sharp	Sharp	Sharp	Intermadiate	Sharp	Sharp	Intermediate	Sharp
chr1	100316044	100317544	+	NM_000644	AGL	coding gene	Sharp	Sharp	Sharp	Sharp	Sharp	Sharp	Sharp	Intermediate	Sharp	Sharp	Sharp	Sharp	Sharp	Sharp	Sharp	Intermadiate	Sharp	Sharp	Intermediate	Sharp
chr1	100326765	100328265	+	NM_000645	None	coding gene	Non	Non	Non	Non	Non	Non	Non	Non	Non	Non	Non	Non	Non	Non	Non	Non	Non	Non	Non	Non
chr1	100316530	100318030	+	NM_000646	AGL	coding gene	Non	Non	Non	Sharp	Sharp	Sharp	Sharp	Intermediate	Sharp	Sharp	Sharp	Sharp	Non	Sharp	Sharp	Intermadiate	Sharp	Sharp	Intermediate	Sharp
chr1	207669472	207670972	+	NM_000651	CR1	coding gene	Sharp	Sharp	Sharp	Sharp	Sharp	Intermediate	Sharp	Sharp	Sharp	Sharp	Sharp	Sharp	Sharp	Sharp	Non	Non	Sharp	Non	Non	Non
chr1	169679343	169680843	-	NM_000655	SELL	coding gene	Sharp	Sharp	Broad	Intermediate	Broad	Broad	Broad	Broad	Broad	Broad	Broad	Broad	Non	Broad	Broad	Broad	Broad	Intermediate	Sharp	Intermediate
chr18	60985113	60986613	-	NM_000657	BCL2	coding gene	Intermediate	Broad	Broad	Broad	Broad	Broad	Broad	Broad	Intermediate	Broad	Intermediate	Intermediate	Intermediate	Broad	Sharp	Broad	Broad	Intermediate	Broad	Broad
chr21	45710273	45711773	+	NM_000658	None	coding gene	Non	Non	Non	Non	Non	Non	Non	Non	Non	Non	Non	Non	Non	Non	Non	Non	Non	Non	Non	Non
chr19	41858331	41859831	-	NM_000660	TGFB1	coding gene	Intermediate	Broad	Broad	Broad	Intermediate	Intermediate	Intermediate	Broad	Intermediate	Intermediate	Intermediate	Intermediate	Intermediate	Intermediate	Intermediate	Broad	Intermediate	Broad	Intermediate	Intermediate
chr4	39459068	39460568	-	NM_000661	RPL9	coding gene	Intermediate	Sharp	Intermediate	Sharp	Intermediate	Broad	Intermediate	Broad	Intermediate	Intermediate	Intermediate	Intermediate	Intermediate	Intermediate	Intermediate	Broad	Sharp	Intermediate	Broad	Intermediate
chr8	18067617	18069117	+	NM_000662	NAT1	coding gene	Sharp	Sharp	Sharp	Sharp	Sharp	Sharp	Sharp	Sharp	Sharp	Sharp	Sharp	Sharp	Non	Sharp	Sharp	Sharp	Sharp	Sharp	Sharp	Sharp
chr16	8806825	8808325	+	NM_000663	ABAT	coding gene	Non	Non	Non	Non	Non	Non	Non	Non	Non	Non	Non	Non	Non	Non	Non	Non	Non	Non	Non	Non
chr7	100492041	100493541	-	NM_000665	ACHE	coding gene	Non	Sharp	Sharp	Sharp	Non	Non	Sharp	Sharp	Sharp	Sharp	Sharp	Sharp	Non	Non	Sharp	Non	Non	Sharp	Non	Non
chr3	52017299	52018799	+	NM_000666	ACY1	coding gene	Sharp	Sharp	Sharp	Sharp	Sharp	Sharp	Sharp	Sharp	Sharp	Sharp	Sharp	Sharp	Sharp	Sharp	Sharp	Sharp	Sharp	Non	Intermediate	Sharp
chr4	100210685	100212185	-	NM_000667	ADH1A	coding gene	Non	Non	Non	Non	Non	Non	Non	Non	Non	Non	Non	Non	Non	Non	Non	Non	Non	Non	Non	Non
chr4	100241072	100242572	-	NM_000668	ADH1B	coding gene	Non	Non	Non	Non	Non	Non	Non	Non	Non	Non	Non	Non	Non	Non	Non	Non	Non	Non	Non	Non
chr4	100272417	100273917	-	NM_000669	ADH1C	coding gene	Non	Non	Non	Non	Non	Non	Non	Non	Non	Non	Non	Non	Non	Non	Non	Non	Non	Non	Non	Non
chr4	100063949	100065449	-	NM_000670	ADH4	coding gene	Non	Non	Non	Non	Non	Non	Non	Non	Non	Non	Non	Non	Non	Non	Non	Non	Non	Non	Non	Non
chr4	100008431	100009931	-	NM_000671	ADH5	coding gene	Sharp	Sharp	Sharp	Sharp	Sharp	Broad	Sharp	Intermediate	Sharp	Sharp	Sharp	Sharp	Sharp	Intermediate	Intermediate	Broad	Sharp	Sharp	Intermediate	Intermediate
chr4	100138903	100140403	-	NM_000672	ADH6	coding gene	Non	Non	Non	Non	Non	Non	Non	Non	Non	Non	Non	Non	Non	Non	Non	Non	Non	Non	Non	Non
chr4	100355167	100356667	-	NM_000673	ADH7	coding gene	Non	Non	Non	Non	Non	Non	Non	Non	Non	Non	Non	Non	Non	Non	Non	Non	Non	Non	Non	Non
chr1	203096835	203098335	+	NM_000674	ADORA1	coding gene	Non	Non	Sharp	Sharp	Non	Non	Sharp	Non	Sharp	Sharp	Sharp	Sharp	Non	Non	Sharp	Sharp	Non	Sharp	Non	Non
chr22	24823529	24825029	+	NM_000675	ADORA2A	coding gene	Broad	Broad	Broad	Broad	Non	Sharp	Intermediate	Sharp	Intermediate	Intermediate	Sharp	Intermediate	Non	Intermediate	Sharp	Sharp	Sharp	Intermediate	Intermediate	Sharp
chr17	15848230	15849730	+	NM_000676	ADORA2B	coding gene	Sharp	Sharp	Sharp	Sharp	Sharp	Sharp	Sharp	Sharp	Sharp	Sharp	Sharp	Sharp	Sharp	Non	Sharp	Sharp	Intermediate	Sharp	Sharp	Non
chr1	112045243	112046743	-	NM_000677	ADORA3	coding gene	Non	Non	Non	Non	Non	Non	Non	Sharp	Non	Non	Non	Sharp	Non	Sharp	Sharp	Sharp	Sharp	Non	Sharp	Sharp
chr20	4228159	4229659	-	NM_000678	ADRA1D	coding gene	Non	Non	Non	Sharp	Non	Non	Sharp	Non	Non	Sharp	Sharp	Non	Non	Non	Non	Non	Non	Non	Non	Non
chr5	159343739	159345239	+	NM_000679	ADRA1B	coding gene	Non	Non	Sharp	Sharp	Sharp	Non	Sharp	Sharp	Non	Sharp	Non	Sharp	Non	Non	Non	Sharp	Non	Sharp	Non	Non
chr8	26721422	26722922	-	NM_000680	ADRA1A	coding gene	Non	Non	Non	Non	Non	Non	Non	Non	Non	Non	Non	Non	Non	Non	Non	Non	Non	Non	Non	Non
chr10	112836789	112838289	+	NM_000681	ADRA2A	coding gene	Non	Non	Intermediate	Sharp	Non	Non	Sharp	Non	Non	Sharp	Non	Non	Sharp	Non	Sharp	Non	Non	Non	Non	Non
chr2	96780388	96781888	-	NM_000682	ADRA2B	coding gene	Non	Sharp	Sharp	Non	Non	Non	Non	Non	Non	Non	Non	Non	Non	Non	Non	Non	Non	Non	Non	Non
chr4	3768295	3769795	+	NM_000683	ADRA2C	coding gene	Non	Non	Non	Non	Non	Non	Sharp	Non	Non	Sharp	Sharp	Sharp	Non	Non	Non	Non	Non	Non	Non	Non
chr10	115803805	115805305	+	NM_000684	ADRB1	coding gene	Sharp	Intermediate	Intermediate	Broad	Non	Sharp	Sharp	Sharp	Intermediate	Intermediate	Sharp	Intermediate	Sharp	Sharp	Sharp	Broad	Sharp	Sharp	Sharp	Non
chr3	148415657	148417157	+	NM_000685	AGTR1	coding gene	Non	Non	Non	Non	Non	Non	Non	Non	Non	Non	Non	Non	Non	Non	Non	Non	Non	Non	Non	Non
chrX	115301957	115303457	+	NM_000686	AGTR2	coding gene	Non	Non	Non	Non	Non	Non	Non	Non	Non	Non	Non	Non	Non	Non	Non	Non	Non	Non	Non	Non
chr20	32889715	32891215	-	NM_000687	AHCY	coding gene	Sharp	Sharp	Sharp	Sharp	Sharp	Sharp	Sharp	Sharp	Sharp	Sharp	Sharp	Sharp	Sharp	Sharp	Sharp	Sharp	Sharp	Sharp	Intermediate	Intermediate
chr3	52232098	52233598	+	NM_000688	ALAS1	coding gene	Sharp	Sharp	Sharp	Sharp	Sharp	Sharp	Sharp	Sharp	Sharp	Sharp	Sharp	Sharp	Sharp	Sharp	Sharp	Sharp	Sharp	Sharp	Sharp	Intermediate
chr9	75566733	75568233	-	NM_000689	ALDH1A1	coding gene	Non	Non	Non	Non	Sharp	Non	Non	Broad	Non	Non	Non	Non	Non	Non	Non	Intermadiate	Non	Non	Non	Non
chr12	112204690	112206190	+	NM_000690	ALDH2	coding gene	Sharp	Sharp	Sharp	Sharp	Sharp	Sharp	Sharp	Sharp	Sharp	Sharp	Sharp	Sharp	Sharp	Non	Non	Sharp	Non	Sharp	Sharp	Non
chr17	19650246	19651746	-	NM_000691	ALDH3A1	coding gene	Non	Non	Non	Non	Non	Non	Non	Non	Non	Non	Non	Non	Non	Non	Non	Non	Non	Non	Non	Non
chr9	38392660	38394160	+	NM_000692	ALDH1B1	coding gene	Sharp	Sharp	Sharp	Sharp	Sharp	Sharp	Sharp	Sharp	Sharp	Sharp	Sharp	Sharp	Sharp	Sharp	Non	Sharp	Sharp	Sharp	Sharp	Non
chr15	101420008	101421508	+	NM_000693	ALDH1A3	coding gene	Non	Non	Sharp	Sharp	Non	Non	Non	Non	Non	Non	Non	Non	Non	Non	Non	Non	Non	Non	Non	Non
chr11	67777789	67779289	+	NM_000694	ALDH3B1	coding gene	Non	Non	Non	Non	Non	Non	Sharp	Sharp	Sharp	Sharp	Non	Non	Non	Non	Non	Non	Non	Non	Sharp	Non
chr11	67440602	67442102	-	NM_000695	None	coding gene	Non	Non	Non	Non	Non	Non	Non	Non	Non	Non	Non	Non	Non	Non	Non	Non	Non	Non	Non	Non
chr1	165666400	165667900	-	NM_000696	ALDH9A1	coding gene	Intermediate	Sharp	Sharp	Sharp	Sharp	Intermediate	Sharp	Intermediate	Sharp	Intermediate	Sharp	Intermediate	Sharp	Sharp	Sharp	Intermadiate	Sharp	Sharp	Intermediate	Intermediate
chr17	6899383	6900883	+	NM_000697	ALOX12	coding gene	Non	Non	Non	Non	Non	Non	Non	Non	Non	Non	Non	Non	Non	Non	Non	Non	Non	Non	Non	Non
chr10	45869623	45871123	+	NM_000698	ALOX5	coding gene	Sharp	Sharp	Sharp	Sharp	Non	Intermediate	Intermediate	Intermediate	Sharp	Intermediate	Sharp	Sharp	Sharp	Non	Non	Non	Non	Sharp	Non	Non
chr1	104159998	104161498	+	NM_000699	AMY2A	coding gene	Non	Non	Non	Non	Non	Non	Non	Non	Non	Non	Non	Non	Non	Non	Non	Non	Non	Non	Non	Non
chr9	75766780	75768280	+	NM_000700	ANXA1	coding gene	Non	Non	Non	Non	Broad	Broad	Intermediate	Broad	Broad	Broad	Sharp	Intermediate	Non	Broad	Broad	Broad	Intermediate	Intermediate	Intermediate	Non
chr1	116915794	116917294	+	NM_000701	ATP1A1	coding gene	Intermediate	Sharp	Intermediate	Sharp	Sharp	Intermediate	Sharp	Sharp	Intermediate	Broad	Intermediate	Intermediate	Sharp	Intermediate	Intermediate	Broad	Broad	Sharp	Intermediate	Intermediate
chr1	160085519	160087019	+	NM_000702	ATP1A2	coding gene	Non	Non	Non	Non	Non	Non	Non	Non	Non	Non	Non	Non	Non	Non	Non	Non	Non	Non	Non	Non
chr19	36053060	36054560	-	NM_000704	ATP4A	coding gene	Non	Non	Non	Non	Non	Non	Non	Non	Non	Non	Non	Non	Non	Non	Non	Non	Non	Non	Non	Non
chr13	114311013	114312513	-	NM_000705	ATP4B	coding gene	Non	Non	Non	Non	Non	Non	Non	Non	Non	Non	Non	Non	Non	Non	Non	Non	Non	Non	Non	Non
chr12	63545090	63546590	-	NM_000706	AVPR1A	coding gene	Sharp	Sharp	Sharp	Sharp	Non	Non	Sharp	Sharp	Sharp	Sharp	Sharp	Sharp	Non	Non	Non	Sharp	Non	Non	Sharp	Non
chr1	206224282	206225782	+	NM_000707	AVPR1B	coding gene	Non	Non	Non	Non	Non	Non	Intermediate	Sharp	Non	Non	Non	Non	Non	Non	Non	Sharp	Non	Sharp	Sharp	Non
chr19	41903693	41905193	+	NM_000709	BCKDHA	coding gene	Sharp	Sharp	Sharp	Sharp	Intermediate	Intermediate	Sharp	Intermediate	Intermediate	Sharp	Sharp	Sharp	Sharp	Intermediate	Intermediate	Intermadiate	Sharp	Sharp	Intermediate	Intermediate
chr14	96722546	96724046	+	NM_000710	BDKRB1	coding gene	Non	Non	Non	Non	Non	Non	Non	Non	Non	Non	Non	Non	Non	Non	Non	Non	Non	Non	Non	Non
chr7	43798271	43799771	+	NM_000712	BLVRA	coding gene	Sharp	Sharp	Sharp	Sharp	Sharp	Sharp	Sharp	Sharp	Sharp	Sharp	Sharp	Sharp	Sharp	Sharp	Sharp	Sharp	Sharp	Sharp	Sharp	Sharp
chr19	40970225	40971725	-	NM_000713	BLVRB	coding gene	Sharp	Sharp	Sharp	Sharp	Sharp	Non	Sharp	Sharp	Sharp	Intermediate	Sharp	Sharp	Non	Sharp	Sharp	Sharp	Sharp	Sharp	Sharp	Non
chr22	43547519	43549019	+	NM_000714	TSPO	coding gene	Sharp	Sharp	Sharp	Sharp	Sharp	Sharp	Intermediate	Intermediate	Sharp	Sharp	Sharp	Sharp	Sharp	Sharp	Non	Sharp	Non	Non	Sharp	Non
chr1	207277606	207279106	+	NM_000715	C4BPA	coding gene	Non	Non	Non	Non	Non	Non	Non	Non	Non	Non	Non	Non	Non	Non	Non	Non	Non	Non	Non	Non
chr1	207262583	207264083	+	NM_000716	C4BPB	coding gene	Non	Sharp	Sharp	Sharp	Sharp	Sharp	Sharp	Sharp	Sharp	Sharp	Sharp	Sharp	Non	Sharp	Sharp	Non	Sharp	Sharp	Sharp	Sharp
chr17	58227301	58228801	+	NM_000717	CA4	coding gene	Non	Non	Non	Non	Non	Non	Sharp	Non	Sharp	Sharp	Sharp	Sharp	Non	Non	Sharp	Non	Sharp	Non	Sharp	Non
chr9	140772240	140773740	+	NM_000718	CACNA1B	coding gene	Non	Sharp	Sharp	Sharp	Non	Non	Non	Non	Non	Non	Non	Non	Non	Non	Non	Non	Non	Non	Non	Non
chr12	2162415	2163915	+	NM_000719	CACNA1C	coding gene	Sharp	Sharp	Sharp	Sharp	Sharp	Sharp	Sharp	Sharp	Sharp	Sharp	Sharp	Sharp	Sharp	Sharp	Sharp	Sharp	Sharp	Sharp	Sharp	Sharp
chr3	53529030	53530530	+	NM_000720	CACNA1D	coding gene	Non	Non	Sharp	Non	Non	Non	Non	Non	Non	Sharp	Non	Non	Non	Non	Non	Non	Non	Sharp	Non	Non
chr1	181452685	181454185	+	NM_000721	CACNA1E	coding gene	Non	Non	Non	Non	Non	Non	Non	Non	Non	Non	Non	Non	Non	Non	Non	Non	Non	Non	Non	Non
chr7	82071531	82073031	-	NM_000722	CACNA2D1	coding gene	Non	Sharp	Sharp	Sharp	Non	Non	Sharp	Non	Sharp	Sharp	Sharp	Sharp	Non	Non	Sharp	Non	Non	Sharp	Sharp	Non
chr17	37352456	37353956	-	NM_000723	CACNB1	coding gene	Intermediate	Sharp	Sharp	Sharp	Sharp	Sharp	Sharp	Broad	Sharp	Sharp	Sharp	Broad	Sharp	Broad	Broad	Broad	Sharp	Broad	Broad	Sharp
chr10	18549583	18551083	+	NM_000724	CACNB2	coding gene	Non	Non	Non	Non	Non	Non	Non	Non	Non	Non	Non	Non	Non	Non	Non	Non	Non	Non	Non	Non
chr12	49212253	49213753	+	NM_000725	CACNB3	coding gene	Sharp	Sharp	Sharp	Sharp	Sharp	Sharp	Sharp	Sharp	Sharp	Sharp	Sharp	Broad	Sharp	Broad	Sharp	Broad	Broad	Sharp	Broad	Broad
chr2	152954093	152955593	-	NM_000726	CACNB4	coding gene	Sharp	Sharp	Sharp	Sharp	Sharp	Non	Sharp	Non	Sharp	Sharp	Sharp	Sharp	Sharp	Non	Sharp	Sharp	Sharp	Sharp	Sharp	Non
chr17	65040651	65042151	+	NM_000727	CACNG1	coding gene	Non	Non	Non	Non	Non	Non	Non	Non	Non	Non	Non	Non	Non	Non	Non	Non	Non	Non	Non	Non
chr11	15095145	15096645	+	NM_000728	CALCB	coding gene	Sharp	Non	Sharp	Sharp	Non	Non	Non	Non	Non	Sharp	Non	Non	Non	Non	Sharp	Non	Non	Non	Non	Non
chr3	42306162	42307662	-	NM_000729	CCK	coding gene	Non	Non	Non	Non	Non	Non	Non	Non	Non	Non	Non	Non	Non	Non	Non	Non	Non	Non	Non	Non
chr4	26490542	26492042	-	NM_000730	CCKAR	coding gene	Non	Non	Non	Non	Non	Non	Non	Non	Non	Non	Non	Non	Non	Non	Non	Non	Non	Non	Non	Non
chr11	118211959	118213459	-	NM_000732	CD3D	coding gene	Broad	Broad	Broad	Broad	Intermediate	Broad	Broad	Broad	Broad	Broad	Broad	Broad	Sharp	Broad	Broad	Broad	Broad	Broad	Broad	Broad
chr11	118175294	118176794	+	NM_000733	CD3E	coding gene	Intermediate	Broad	Broad	Broad	Non	Intermediate	Intermediate	Sharp	Intermediate	Broad	Intermediate	Intermediate	Sharp	Broad	Intermediate	Intermadiate	Intermediate	Intermediate	Intermediate	Intermediate
chr1	167486347	167487847	-	NM_000734	CD247	coding gene	Broad	Broad	Broad	Broad	Sharp	Broad	Intermediate	Sharp	Intermediate	Broad	Sharp	Intermediate	Non	Broad	Intermediate	Broad	Broad	Sharp	Intermediate	Broad
chr6	87803365	87804865	-	NM_000735	CGA	coding gene	Non	Non	Non	Non	Non	Non	Non	Non	Non	Non	Non	Non	Non	Non	Non	Non	Non	Non	Non	Non
chr19	49526132	49527632	-	NM_000737	CGB3	coding gene	Non	Non	Non	Non	Non	Non	Non	Non	Non	Non	Non	Non	Non	Non	Non	Non	Non	Non	Non	Non
chr11	62687512	62689012	-	NM_000738	CHRM1	coding gene	Non	Non	Non	Non	Non	Non	Non	Non	Non	Non	Non	Non	Non	Non	Non	Non	Non	Non	Non	Non
chr7	136553831	136555331	+	NM_000739	CHRM2	coding gene	Non	Non	Non	Non	Non	Non	Non	Non	Non	Non	Non	Non	Non	Non	Non	Non	Non	Non	Non	Non
chr1	239792372	239793872	+	NM_000740	CHRM3	coding gene	Non	Non	Non	Non	Sharp	Non	Non	Non	Non	Sharp	Non	Non	Non	Non	Non	Non	Non	Non	Intermediate	Non
chr11	46406607	46408107	-	NM_000741	CHRM4	coding gene	Non	Non	Non	Non	Non	Non	Non	Non	Non	Non	Non	Non	Non	Non	Non	Non	Non	Non	Non	Non
chr8	27335313	27336813	-	NM_000742	CHRNA2	coding gene	Non	Non	Non	Non	Non	Sharp	Non	Non	Non	Non	Non	Non	Non	Non	Non	Non	Non	Non	Non	Non
chr15	78912137	78913637	-	NM_000743	CHRNA3	coding gene	Broad	Intermediate	Sharp	Sharp	Sharp	Broad	Sharp	Non	Sharp	Intermediate	Sharp	Intermediate	Sharp	Sharp	Intermediate	Sharp	Sharp	Sharp	Intermediate	Intermediate
chr20	61991248	61992748	-	NM_000744	CHRNA4	coding gene	Non	Non	Non	Non	Non	Non	Non	Non	Non	Non	Non	Non	Non	Non	Non	Non	Non	Non	Non	Non
chr15	78857861	78859361	+	NM_000745	CHRNA5	coding gene	Sharp	Sharp	Sharp	Sharp	Intermediate	Broad	Intermediate	Sharp	Sharp	Intermediate	Intermediate	Intermediate	Sharp	Sharp	Sharp	Intermadiate	Sharp	Intermediate	Intermediate	Sharp
chr15	32322685	32324185	+	NM_000746	CHRNA7	coding gene	Sharp	Sharp	Sharp	Sharp	Non	Non	Sharp	Non	Sharp	Sharp	Sharp	Sharp	Non	Non	Sharp	Sharp	Non	Sharp	Non	Non
chr17	7348405	7349905	+	NM_000747	CHRNB1	coding gene	Non	Sharp	Sharp	Sharp	Sharp	Sharp	Sharp	Sharp	Sharp	Sharp	Sharp	Sharp	Sharp	Sharp	Non	Sharp	Non	Sharp	Sharp	Non
chr1	154540256	154541756	+	NM_000748	CHRNB2	coding gene	Non	Non	Non	Non	Non	Non	Sharp	Sharp	Non	Sharp	Non	Sharp	Non	Non	Sharp	Non	Non	Sharp	Non	Non
chr8	42552561	42554061	+	NM_000749	CHRNB3	coding gene	Non	Non	Non	Non	Non	Non	Non	Non	Non	Non	Non	Non	Non	Non	Non	Non	Non	Non	Non	Non
chr15	78932087	78933587	-	NM_000750	CHRNB4	coding gene	Sharp	Sharp	Sharp	Sharp	Non	Non	Sharp	Non	Sharp	Sharp	Sharp	Sharp	Non	Non	Non	Non	Sharp	Non	Sharp	Non
chr2	233390869	233392369	+	NM_000751	CHRND	coding gene	Non	Non	Non	Non	Non	Non	Non	Non	Non	Non	Non	Non	Non	Non	Non	Non	Non	Non	Non	Non
chr22	19929262	19930762	+	NM_000754	COMT	coding gene	Intermediate	Intermediate	Sharp	Sharp	Sharp	Intermediate	Intermediate	Intermediate	Intermediate	Intermediate	Sharp	Intermediate	Sharp	Intermediate	Intermediate	Intermadiate	Intermediate	Intermediate	Intermediate	Intermediate
chr9	131871570	131873070	-	NM_000755	CRAT	coding gene	Intermediate	Sharp	Sharp	Sharp	Sharp	Non	Sharp	Intermediate	Sharp	Sharp	Sharp	Sharp	Sharp	Sharp	Sharp	Non	Sharp	Sharp	Intermediate	Non
chr8	67089346	67090846	-	NM_000756	CRH	coding gene	Non	Non	Sharp	Sharp	Non	Sharp	Sharp	Sharp	Sharp	Sharp	Sharp	Sharp	Non	Non	Sharp	Sharp	Sharp	Sharp	Sharp	Non
chr1	110453232	110454732	+	NM_000757	CSF1	coding gene	Sharp	Sharp	Sharp	Sharp	Sharp	Broad	Sharp	Intermediate	Sharp	Sharp	Sharp	Sharp	Sharp	Intermediate	Sharp	Broad	Non	Non	Intermediate	Sharp
chr5	131409484	131410984	+	NM_000758	CSF2	coding gene	Non	Non	Non	Non	Non	Non	Non	Non	Non	Non	Non	Non	Non	Non	Non	Non	Non	Non	Non	Non
chr17	38171613	38173113	+	NM_000759	CSF3	coding gene	Non	Non	Non	Non	Non	Non	Non	Non	Non	Non	Non	Non	Non	Non	Non	Non	Non	Non	Non	Non
chr1	36947415	36948915	-	NM_000760	CSF3R	coding gene	Non	Non	Sharp	Sharp	Non	Sharp	Sharp	Sharp	Sharp	Sharp	Non	Non	Non	Non	Non	Non	Non	Non	Sharp	Non
chr15	75041183	75042683	+	NM_000761	CYP1A2	coding gene	Non	Non	Non	Non	Non	Non	Non	Non	Non	Non	Non	Non	Non	Non	Non	Non	Non	Non	Non	Non
chr19	41354852	41356352	-	NM_000762	CYP2A6	coding gene	Non	Non	Non	Non	Non	Non	Non	Non	Non	Non	Non	Non	Non	Non	Non	Non	Non	Non	Non	Non
chr19	41387157	41388657	-	NM_000764	CYP2A7	coding gene	Non	Non	Non	Non	Non	Non	Non	Non	Non	Non	Non	Non	Non	Non	Non	Non	Non	Non	Non	Non
chr7	99331319	99332819	-	NM_000765	CYP3A7	coding gene	Non	Non	Non	Non	Non	Non	Non	Non	Non	Non	Non	Non	Non	Non	Non	Non	Non	Non	Non	Non
chr19	41594355	41595855	+	NM_000766	CYP2A13	coding gene	Non	Non	Non	Non	Non	Non	Non	Non	Non	Non	Non	Non	Non	Non	Non	Non	Non	Non	Non	Non
chr19	41497203	41498703	+	NM_000767	CYP2B6	coding gene	Non	Non	Non	Non	Non	Non	Non	Non	Non	Non	Non	Non	Non	Non	Non	Non	Non	Non	Non	Non
chr10	96522462	96523962	+	NM_000769	CYP2C19	coding gene	Non	Non	Non	Non	Non	Non	Non	Non	Non	Non	Non	Non	Non	Non	Non	Non	Non	Non	Non	Non
chr10	96827754	96829254	-	NM_000770	CYP2C8	coding gene	Non	Non	Non	Non	Non	Non	Non	Non	Non	Non	Non	Non	Non	Non	Non	Non	Non	Non	Non	Non
chr10	96698414	96699914	+	NM_000771	CYP2C9	coding gene	Non	Non	Non	Non	Non	Non	Non	Non	Non	Non	Non	Non	Non	Non	Non	Non	Non	Non	Non	Non
chr10	96443250	96444750	+	NM_000772	CYP2C18	coding gene	Non	Non	Non	Non	Non	Non	Non	Non	Non	Non	Non	Non	Non	Non	Non	Non	Non	Non	Non	Non
chr10	135340866	135342366	+	NM_000773	CYP2E1	coding gene	Non	Non	Sharp	Sharp	Non	Non	Sharp	Intermediate	Non	Sharp	Non	Sharp	Non	Non	Sharp	Non	Non	Non	Sharp	Non
chr19	41620352	41621852	+	NM_000774	CYP2F1	coding gene	Non	Non	Non	Non	Non	Non	Non	Non	Non	Non	Non	Non	Non	Non	Non	Non	Non	Non	Non	Non
chr1	60390923	60392423	-	NM_000775	CYP2J2	coding gene	Sharp	Sharp	Sharp	Sharp	Sharp	Sharp	Sharp	Non	Sharp	Sharp	Sharp	Sharp	Non	Non	Sharp	Non	Sharp	Sharp	Sharp	Non
chr7	99276121	99277621	-	NM_000777	CYP3A5	coding gene	Non	Non	Non	Non	Non	Non	Non	Non	Non	Non	Non	Non	Non	Non	Non	Non	Non	Non	Non	Non
chr1	47405656	47407156	-	NM_000778	CYP4A11	coding gene	Non	Non	Non	Non	Non	Non	Non	Non	Non	Non	Non	Non	Non	Non	Non	Non	Non	Non	Non	Non
chr1	47264669	47266169	+	NM_000779	CYP4B1	coding gene	Non	Non	Non	Non	Non	Non	Non	Non	Non	Non	Non	Non	Non	Non	Non	Non	Non	Non	Non	Non
chr8	59411220	59412720	-	NM_000780	CYP7A1	coding gene	Non	Non	Non	Non	Non	Non	Non	Non	Non	Non	Non	Non	Non	Non	Non	Non	Non	Non	Non	Non
chr15	74658581	74660081	-	NM_000781	CYP11A1	coding gene	Non	Sharp	Sharp	Sharp	Sharp	Sharp	Sharp	Sharp	Sharp	Sharp	Sharp	Sharp	Non	Non	Non	Non	Non	Non	Sharp	Non
chr20	52789016	52790516	-	NM_000782	CYP24A1	coding gene	Non	Non	Non	Non	Non	Non	Non	Non	Non	Sharp	Non	Non	Non	Non	Non	Non	Non	Sharp	Non	Non
chr10	94833646	94835146	+	NM_000783	CYP26A1	coding gene	Non	Non	Sharp	Sharp	Intermediate	Non	Sharp	Sharp	Intermediate	Intermediate	Sharp	Intermediate	Sharp	Non	Sharp	Sharp	Sharp	Sharp	Sharp	Sharp
chr2	219646471	219647971	+	NM_000784	CYP27A1	coding gene	Non	Non	Non	Non	Non	Non	Sharp	Non	Sharp	Sharp	Non	Non	Non	Non	Non	Non	Non	Non	Non	Non
chr12	58159476	58160976	-	NM_000785	CYP27B1	coding gene	Non	Non	Sharp	Sharp	Non	Non	Sharp	Non	Sharp	Sharp	Sharp	Sharp	Non	Non	Sharp	Non	Sharp	Sharp	Non	Non
chr7	91762340	91763840	-	NM_000786	CYP51A1	coding gene	Sharp	Sharp	Sharp	Sharp	Sharp	Sharp	Sharp	Intermediate	Sharp	Intermediate	Sharp	Intermediate	Sharp	Sharp	Sharp	Broad	Sharp	Sharp	Sharp	Non
chr9	136501484	136502984	+	NM_000787	DBH	coding gene	Non	Non	Non	Non	Non	Non	Non	Non	Non	Non	Non	Non	Non	Non	Non	Non	Non	Non	Non	Non
chr4	71859264	71860764	+	NM_000788	DCK	coding gene	Broad	Broad	Broad	Broad	Intermediate	Broad	Broad	Broad	Broad	Broad	Broad	Broad	Sharp	Broad	Broad	Broad	Broad	Broad	Broad	Intermediate
chr17	61554421	61555921	+	NM_000789	ACE	coding gene	Sharp	Sharp	Sharp	Sharp	Sharp	Sharp	Sharp	Sharp	Sharp	Sharp	Sharp	Sharp	Sharp	Sharp	Sharp	Sharp	Sharp	Sharp	Sharp	Sharp
chr7	50627268	50628768	-	NM_000790	DDC	coding gene	Non	Non	Non	Non	Non	Non	Non	Non	Non	Non	Non	Non	Non	Non	Non	Non	Non	Non	Non	Non
chr5	79949300	79950800	-	NM_000791	DHFR	coding gene	Intermediate	Sharp	Sharp	Sharp	Sharp	Intermediate	Sharp	Intermediate	Sharp	Sharp	Sharp	Sharp	Sharp	Intermediate	Intermediate	Intermadiate	Sharp	Sharp	Intermediate	Intermediate
chr1	54359860	54361360	+	NM_000792	DIO1	coding gene	Non	Non	Non	Non	Non	Non	Non	Non	Non	Non	Non	Non	Non	Non	Non	Non	Non	Non	Non	Non
chr14	80695897	80697397	-	NM_000793	DIO2	coding gene	Non	Non	Non	Non	Non	Non	Non	Non	Non	Non	Non	Non	Non	Non	Non	Non	Non	Non	Non	Non
chr5	174869663	174871163	-	NM_000794	DRD1	coding gene	Non	Non	Non	Non	Non	Non	Non	Non	Non	Non	Non	Non	Non	Non	Non	Non	Non	Non	Non	Non
chr11	113344501	113346001	-	NM_000795	DRD2	coding gene	Non	Non	Non	Non	Non	Non	Non	Non	Non	Non	Non	Non	Non	Non	Non	Non	Non	Non	Non	Non
chr3	113896399	113897899	-	NM_000796	DRD3	coding gene	Non	Non	Non	Non	Non	Non	Non	Non	Non	Non	Non	Non	Non	Non	Non	Non	Non	Non	Non	Non
chr11	637304	638804	+	NM_000797	DRD4	coding gene	Non	Non	Non	Sharp	Non	Non	Non	Non	Non	Non	Non	Non	Non	Non	Non	Non	Non	Non	Non	Non
chr4	9783257	9784757	+	NM_000798	DRD5	coding gene	Non	Non	Non	Non	Non	Non	Sharp	Non	Sharp	Sharp	Non	Non	Non	Non	Non	Non	Non	Non	Non	Non
chr7	100318422	100319922	+	NM_000799	EPO	coding gene	Non	Non	Non	Non	Non	Non	Non	Non	Non	Non	Non	Non	Non	Non	Non	Non	Non	Non	Non	Non
chr5	142064153	142065653	-	NM_000800	FGF1	coding gene	Non	Non	Non	Non	Non	Non	Non	Non	Non	Non	Non	Non	Non	Non	Non	Non	Non	Non	Non	Non
chr20	1372316	1373816	-	NM_000801	FKBP1A	coding gene	Sharp	Intermediate	Broad	Broad	Sharp	Intermediate	Broad	Sharp	Intermediate	Broad	Intermediate	Broad	Sharp	Broad	Intermediate	Broad	Broad	Broad	Broad	Broad
chr11	71900958	71902458	+	NM_000802	FOLR1	coding gene	Non	Non	Non	Non	Non	Non	Non	Non	Non	Non	Non	Non	Non	Non	Non	Non	Non	Non	Non	Non
chr11	71927818	71929318	+	NM_000803	FOLR2	coding gene	Non	Non	Non	Non	Non	Non	Non	Sharp	Non	Non	Non	Non	Non	Non	Non	Non	Non	Non	Non	Non
chr11	71846770	71848270	+	NM_000804	FOLR3	coding gene	Non	Non	Non	Non	Non	Non	Sharp	Non	Sharp	Sharp	Non	Non	Non	Non	Non	Non	Non	Non	Non	Non
chr17	39868577	39870077	+	NM_000805	GAST	coding gene	Non	Non	Non	Non	Non	Non	Non	Non	Non	Non	Non	Non	Non	Non	Non	Non	Non	Non	Non	Non
chr5	161274196	161275696	+	NM_000806	GABRA1	coding gene	Non	Non	Non	Non	Non	Non	Non	Non	Non	Non	Non	Non	Non	Non	Non	Non	Non	Non	Non	Non
chr4	46390556	46392056	-	NM_000807	GABRA2	coding gene	Non	Non	Non	Non	Non	Non	Non	Non	Non	Sharp	Non	Non	Non	Non	Non	Non	Non	Non	Non	Non
chrX	151618331	151619831	-	NM_000808	GABRA3	coding gene	Non	Non	Non	Non	Non	Non	Non	Non	Non	Non	Non	Non	Non	Non	Non	Non	Sharp	Sharp	Non	Non
chr4	46994924	46996424	-	NM_000809	GABRA4	coding gene	Non	Non	Non	Non	Non	Non	Non	Non	Non	Sharp	Non	Non	Non	Non	Non	Non	Non	Non	Non	Non
chr15	27111865	27113365	+	NM_000810	GABRA5	coding gene	Non	Non	Non	Non	Non	Non	Non	Non	Non	Non	Sharp	Non	Non	Non	Non	Non	Non	Non	Non	Non
chr5	161112657	161114157	+	NM_000811	GABRA6	coding gene	Non	Non	Non	Non	Non	Non	Non	Non	Non	Non	Non	Non	Non	Non	Non	Non	Non	Non	Non	Non
chr4	47033294	47034794	+	NM_000812	GABRB1	coding gene	Non	Non	Sharp	Sharp	Non	Non	Non	Sharp	Sharp	Sharp	Non	Sharp	Non	Non	Non	Non	Non	Non	Non	Non
chr5	160973630	160975130	-	NM_000813	GABRB2	coding gene	Non	Sharp	Sharp	Sharp	Non	Non	Sharp	Non	Sharp	Sharp	Sharp	Sharp	Sharp	Non	Sharp	Non	Sharp	Sharp	Sharp	Non
chr15	27016723	27018223	-	NM_000814	GABRB3	coding gene	Non	Non	Non	Sharp	Non	Non	Sharp	Non	Sharp	Non	Sharp	Non	Non	Non	Sharp	Non	Sharp	Non	Non	Non
chr1	1950767	1952267	+	NM_000815	GABRD	coding gene	Non	Sharp	Sharp	Sharp	Non	Non	Sharp	Sharp	Sharp	Sharp	Sharp	Sharp	Non	Non	Non	Non	Non	Sharp	Non	Non
chr5	161494647	161496147	+	NM_000816	GABRG2	coding gene	Non	Non	Non	Non	Non	Non	Non	Non	Non	Non	Non	Non	Non	Non	Non	Non	Non	Non	Non	Non
chr2	171673199	171674699	+	NM_000817	GAD1	coding gene	Non	Sharp	Intermediate	Intermediate	Sharp	Non	Sharp	Sharp	Sharp	Sharp	Sharp	Sharp	Non	Non	Sharp	Sharp	Non	Sharp	Sharp	Non
chr10	26505235	26506735	+	NM_000818	GAD2	coding gene	Non	Non	Sharp	Sharp	Non	Intermediate	Sharp	Non	Sharp	Intermediate	Non	Intermediate	Non	Sharp	Sharp	Sharp	Sharp	Broad	Non	Sharp
chr21	34912964	34914464	-	NM_000819	GART	coding gene	Broad	Intermediate	Intermediate	Intermediate	Intermediate	Broad	Broad	Broad	Broad	Sharp	Broad	Broad	Intermediate	Broad	Broad	Broad	Broad	Broad	Broad	Broad
chr13	114565546	114567046	-	NM_000820	GAS6	coding gene	Non	Non	Sharp	Sharp	Non	Non	Sharp	Non	Sharp	Sharp	Sharp	Sharp	Sharp	Non	Non	Non	Non	Non	Non	Sharp
chr2	85787157	85788657	-	NM_000821	GGCX	coding gene	Sharp	Sharp	Sharp	Sharp	Sharp	Sharp	Sharp	Sharp	Sharp	Sharp	Sharp	Sharp	Sharp	Sharp	Sharp	Sharp	Sharp	Sharp	Sharp	Sharp
chr7	31003635	31005135	+	NM_000823	GHRHR	coding gene	Non	Non	Non	Non	Non	Non	Non	Non	Non	Non	Non	Non	Non	Non	Non	Non	Non	Non	Non	Non
chr4	157997276	157998776	+	NM_000824	GLRB	coding gene	Sharp	Sharp	Sharp	Sharp	Non	Non	Non	Non	Non	Sharp	Non	Non	Non	Non	Sharp	Non	Non	Non	Non	Non
chr8	25281056	25282556	-	NM_000825	GNRH1	coding gene	Non	Non	Non	Non	Non	Non	Non	Non	Non	Non	Non	Non	Non	Non	Non	Non	Non	Non	Non	Non
chr4	158141735	158143235	+	NM_000826	GRIA2	coding gene	Non	Non	Non	Non	Non	Non	Non	Non	Non	Non	Non	Non	Non	Non	Non	Non	Non	Non	Non	Non
chr5	152870083	152871583	+	NM_000827	GRIA1	coding gene	Non	Non	Non	Non	Non	Non	Non	Non	Non	Non	Non	Non	Non	Non	Non	Non	Non	Non	Non	Non
chrX	122318095	122319595	+	NM_000828	GRIA3	coding gene	Non	Non	Non	Non	Non	Non	Non	Non	Sharp	Sharp	Non	Sharp	Non	Non	Non	Non	Non	Non	Non	Non
chr11	105480799	105482299	+	NM_000829	GRIA4	coding gene	Non	Non	Non	Non	Non	Non	Non	Non	Non	Non	Non	Non	Non	Non	Non	Non	Non	Non	Non	Non
chr21	31310782	31312282	-	NM_000830	GRIK1	coding gene	Non	Non	Non	Non	Non	Non	Non	Non	Non	Non	Non	Non	Non	Non	Non	Non	Non	Non	Non	Non
chr1	37498344	37499844	-	NM_000831	GRIK3	coding gene	Non	Non	Non	Non	Non	Non	Non	Non	Non	Non	Non	Non	Non	Non	Non	Non	Non	Non	Non	Non
chr9	140033608	140035108	+	NM_000832	GRIN1	coding gene	Non	Non	Non	Non	Non	Non	Non	Non	Non	Non	Non	Sharp	Non	Non	Non	Non	Sharp	Non	Non	Non
chr16	10275111	10276611	-	NM_000833	GRIN2A	coding gene	Non	Non	Non	Non	Non	Non	Non	Non	Non	Sharp	Non	Non	Non	Non	Non	Non	Non	Sharp	Non	Non
chr12	14131522	14133022	-	NM_000834	GRIN2B	coding gene	Non	Non	Non	Non	Non	Non	Non	Non	Non	Non	Non	Non	Non	Non	Non	Non	Non	Non	Non	Non
chr17	72854507	72856007	-	NM_000835	GRIN2C	coding gene	Non	Non	Sharp	Sharp	Sharp	Sharp	Sharp	Sharp	Non	Sharp	Non	Sharp	Non	Non	Sharp	Non	Sharp	Sharp	Sharp	Non
chr19	48898131	48899631	+	NM_000836	GRIN2D	coding gene	Non	Non	Non	Non	Non	Non	Non	Non	Non	Non	Non	Non	Non	Non	Non	Non	Non	Non	Non	Non
chr8	145064225	145065725	+	NM_000837	GRINA	coding gene	Sharp	Sharp	Sharp	Sharp	Sharp	Sharp	Sharp	Sharp	Sharp	Sharp	Sharp	Sharp	Sharp	Sharp	Sharp	Sharp	Sharp	Sharp	Sharp	Sharp
chr6	146348781	146350281	+	NM_000838	None	coding gene	Non	Non	Non	Non	Non	Non	Non	Non	Non	Sharp	Non	Non	Non	Non	Non	Non	Non	Non	Non	Non
chr3	51741080	51742580	+	NM_000839	GRM2	coding gene	Non	Sharp	Sharp	Sharp	Non	Non	Sharp	Non	Sharp	Sharp	Sharp	Sharp	Non	Non	Non	Non	Non	Non	Non	Non
chr7	86273229	86274729	+	NM_000840	GRM3	coding gene	Non	Non	Non	Non	Non	Non	Non	Non	Non	Non	Non	Non	Non	Non	Non	Non	Non	Non	Non	Non
chr6	34112414	34113914	-	NM_000841	GRM4	coding gene	Non	Sharp	Sharp	Sharp	Sharp	Sharp	Sharp	Sharp	Sharp	Sharp	Sharp	Sharp	Sharp	Non	Sharp	Sharp	Sharp	Sharp	Sharp	Non
chr11	88795316	88796816	-	NM_000842	GRM5	coding gene	Non	Non	Non	Non	Non	Non	Non	Non	Non	Non	Non	Non	Non	Non	Non	Non	Non	Non	Non	Non
chr5	178420624	178422124	-	NM_000843	GRM6	coding gene	Non	Non	Non	Non	Non	Non	Non	Non	Non	Non	Non	Non	Non	Non	Non	Non	Non	Non	Non	Non
chr3	6902801	6904301	+	NM_000844	GRM7	coding gene	Non	Non	Non	Non	Non	Non	Non	Non	Non	Non	Non	Non	Non	Non	Non	Non	Non	Non	Non	Non
chr7	126882069	126883569	-	NM_000845	GRM8	coding gene	Non	Non	Non	Non	Non	Non	Non	Non	Non	Non	Non	Non	Non	Non	Non	Non	Non	Non	Non	Non
chr6	52626861	52628361	-	NM_000846	GSTA2	coding gene	Non	Non	Non	Non	Non	Non	Non	Non	Non	Non	Non	Non	Non	Non	Non	Non	Non	Non	Non	Non
chr6	52772996	52774496	-	NM_000847	GSTA3	coding gene	Non	Non	Non	Non	Non	Non	Non	Non	Non	Non	Non	Non	Non	Non	Non	Non	Non	Non	Non	Non
chr1	110210643	110212143	+	NM_000848	GSTM2	coding gene	Sharp	Sharp	Sharp	Sharp	Sharp	Sharp	Sharp	Intermediate	Sharp	Sharp	Sharp	Sharp	Non	Sharp	Sharp	Sharp	Sharp	Sharp	Intermediate	Sharp
chr1	110282160	110283660	-	NM_000849	GSTM3	coding gene	Sharp	Sharp	Sharp	Sharp	Non	Non	Sharp	Sharp	Sharp	Sharp	Sharp	Sharp	Sharp	Non	Sharp	Sharp	Non	Sharp	Sharp	Non
chr1	110198697	110200197	+	NM_000850	GSTM4	coding gene	Sharp	Sharp	Sharp	Sharp	Sharp	Sharp	Sharp	Sharp	Sharp	Sharp	Sharp	Sharp	Sharp	Non	Sharp	Sharp	Sharp	Sharp	Sharp	Sharp
chr1	110254863	110256363	+	NM_000851	GSTM5	coding gene	Non	Sharp	Sharp	Non	Non	Non	Non	Sharp	Non	Non	Non	Non	Non	Non	Non	Non	Non	Non	Non	Non
chr11	67351065	67352565	+	NM_000852	GSTP1	coding gene	Sharp	Sharp	Sharp	Sharp	Sharp	Intermediate	Sharp	Intermediate	Sharp	Sharp	Sharp	Sharp	Sharp	Intermediate	Intermediate	Broad	Sharp	Intermediate	Intermediate	Intermediate
chr22	24382784	24384284	-	NM_000853	None	coding gene	Non	Non	Sharp	Sharp	Non	Non	Non	Non	Non	Non	Non	Non	Non	Non	Non	Non	Non	Non	Non	Non
chr22	24322313	24323813	+	NM_000854	None	coding gene	Non	Non	Non	Non	Non	Non	Non	Non	Non	Sharp	Non	Non	Non	Non	Non	Non	Non	Non	Non	Non
chr22	24301893	24303393	-	NM_000854_1	None	coding gene	Non	Non	Non	Non	Non	Non	Non	Non	Non	Sharp	Non	Sharp	Non	Non	Non	Non	Non	Non	Non	Non
chr11	106887671	106889171	-	NM_000855	GUCY1A2	coding gene	Non	Non	Sharp	Sharp	Non	Non	Sharp	Non	Sharp	Sharp	Sharp	Sharp	Non	Non	Non	Non	Sharp	Sharp	Sharp	Sharp
chr4	156587861	156589361	+	NM_000856	GUCY1A1	coding gene	Intermediate	Sharp	Sharp	Sharp	Sharp	Intermediate	Intermediate	Intermediate	Sharp	Intermediate	Intermediate	Intermediate	Sharp	Sharp	Intermediate	Broad	Sharp	Sharp	Sharp	Sharp
chr4	156680125	156681625	+	NM_000857	GUCY1B1	coding gene	Sharp	Sharp	Sharp	Sharp	Intermediate	Sharp	Sharp	Sharp	Sharp	Sharp	Sharp	Sharp	Sharp	Sharp	Sharp	Sharp	Sharp	Sharp	Non	Sharp
chr1	228327928	228329428	+	NM_000858	GUK1	coding gene	Broad	Broad	Intermediate	Intermediate	Intermediate	Intermediate	Intermediate	Intermediate	Broad	Broad	Intermediate	Broad	Sharp	Intermediate	Broad	Broad	Broad	Broad	Broad	Intermediate
chr5	74632992	74634492	+	NM_000859	HMGCR	coding gene	Sharp	Sharp	Sharp	Sharp	Sharp	Intermediate	Intermediate	Intermediate	Sharp	Intermediate	Intermediate	Intermediate	Sharp	Broad	Intermediate	Broad	Intermediate	Sharp	Intermediate	Intermediate
chr4	175442549	175444049	-	NM_000860	HPGD	coding gene	Sharp	Sharp	Intermediate	Sharp	Non	Non	Broad	Non	Intermediate	Intermediate	Broad	Broad	Non	Non	Sharp	Non	Sharp	Sharp	Intermediate	Non
chr3	11294384	11295884	+	NM_000861	HRH1	coding gene	Non	Non	Non	Non	Non	Non	Non	Non	Non	Non	Non	Non	Non	Non	Non	Non	Non	Non	Non	Non
chr1	120049825	120051325	+	NM_000862	HSD3B1	coding gene	Non	Non	Non	Non	Non	Non	Non	Non	Non	Non	Non	Non	Non	Non	Non	Non	Non	Non	Non	Non
chr6	78171620	78173120	-	NM_000863	HTR1B	coding gene	Non	Non	Non	Non	Non	Non	Non	Non	Non	Non	Non	Non	Non	Non	Non	Non	Non	Non	Non	Non
chr1	23519722	23521222	-	NM_000864	HTR1D	coding gene	Non	Non	Non	Non	Non	Non	Non	Non	Non	Non	Non	Non	Non	Non	Non	Non	Non	Non	Non	Non
chr6	87647023	87648523	+	NM_000865	HTR1E	coding gene	Non	Non	Non	Non	Non	Non	Non	Non	Non	Non	Non	Non	Non	Non	Non	Non	Non	Non	Non	Non
chr3	88031725	88033225	+	NM_000866	HTR1F	coding gene	Non	Non	Non	Non	Non	Non	Non	Non	Non	Non	Non	Non	Non	Non	Non	Non	Non	Non	Non	Non
chr2	231988324	231989824	-	NM_000867	HTR2B	coding gene	Non	Non	Intermediate	Non	Non	Non	Non	Sharp	Non	Non	Non	Non	Non	Non	Sharp	Non	Sharp	Non	Sharp	Sharp
chrX	113818550	113820050	+	NM_000868	HTR2C	coding gene	Non	Non	Non	Non	Non	Non	Non	Non	Non	Sharp	Non	Non	Non	Non	Non	Non	Non	Non	Non	Non
chr11	113845796	113847296	+	NM_000869	HTR3A	coding gene	Non	Non	Non	Non	Non	Non	Non	Non	Non	Non	Non	Non	Non	Non	Non	Non	Non	Non	Non	Non
chr5	148032239	148033739	-	NM_000870	HTR4	coding gene	Non	Non	Sharp	Sharp	Non	Non	Non	Non	Non	Non	Non	Non	Non	Non	Non	Non	Non	Non	Non	Non
chr1	19991779	19993279	+	NM_000871	HTR6	coding gene	Non	Non	Non	Sharp	Non	Non	Sharp	Non	Non	Sharp	Non	Sharp	Non	Non	Sharp	Non	Non	Non	Sharp	Non
chr10	92616171	92617671	-	NM_000872	HTR7	coding gene	Sharp	Sharp	Sharp	Sharp	Sharp	Sharp	Sharp	Sharp	Sharp	Sharp	Sharp	Sharp	Sharp	Sharp	Sharp	Sharp	Sharp	Sharp	Sharp	Sharp
chr17	62082783	62084283	-	NM_000873	ICAM2	coding gene	Non	Non	Non	Non	Non	Non	Non	Non	Non	Non	Non	Non	Non	Non	Non	Non	Non	Sharp	Non	Non
chr21	34602230	34603730	+	NM_000874	IFNAR2	coding gene	Intermediate	Intermediate	Intermediate	Sharp	Sharp	Broad	Broad	Broad	Intermediate	Intermediate	Intermediate	Intermediate	Sharp	Intermediate	Intermediate	Broad	Intermediate	Broad	Intermediate	Intermediate
chr15	99192760	99194260	+	NM_000875	IGF1R	coding gene	Broad	Broad	Broad	Broad	Broad	Broad	Broad	Broad	Broad	Broad	Intermediate	Intermediate	Broad	Broad	Sharp	Broad	Intermediate	Broad	Broad	Broad
chr6	160390130	160391630	+	NM_000876	IGF2R	coding gene	Intermediate	Sharp	Sharp	Sharp	Sharp	Broad	Sharp	Sharp	Intermediate	Intermediate	Sharp	Intermediate	Sharp	Broad	Intermediate	Intermadiate	Broad	Sharp	Broad	Intermediate
chr2	102770401	102771901	+	NM_000877	IL1R1	coding gene	Non	Non	Non	Non	Non	Non	Non	Non	Non	Non	Non	Non	Non	Non	Non	Non	Non	Non	Non	Non
chr22	37544462	37545962	-	NM_000878	IL2RB	coding gene	Non	Broad	Broad	Broad	Non	Sharp	Sharp	Sharp	Sharp	Sharp	Non	Non	Non	Sharp	Sharp	Sharp	Sharp	Sharp	Sharp	Sharp
chr5	131877714	131879214	-	NM_000879	IL5	coding gene	Non	Non	Non	Non	Non	Non	Non	Non	Non	Non	Non	Non	Non	Non	Non	Non	Non	Non	Non	Non
chr8	79716258	79717758	-	NM_000880	IL7	coding gene	Non	Non	Non	Non	Non	Non	Sharp	Non	Sharp	Sharp	Sharp	Sharp	Non	Non	Non	Non	Non	Sharp	Sharp	Non
chr3	159706622	159708122	+	NM_000882	IL12A	coding gene	Sharp	Sharp	Sharp	Sharp	Sharp	Sharp	Intermediate	Sharp	Sharp	Sharp	Sharp	Sharp	Sharp	Non	Sharp	Sharp	Non	Non	Sharp	Non
chr7	128048536	128050036	-	NM_000883	IMPDH1	coding gene	Sharp	Sharp	Sharp	Sharp	Sharp	Sharp	Intermediate	Sharp	Sharp	Intermediate	Sharp	Sharp	Sharp	Sharp	Sharp	Sharp	Sharp	Sharp	Sharp	Sharp
chr3	49065375	49066875	-	NM_000884	IMPDH2	coding gene	Sharp	Sharp	Sharp	Sharp	Sharp	Sharp	Sharp	Sharp	Sharp	Sharp	Sharp	Sharp	Sharp	Broad	Sharp	Sharp	Sharp	Sharp	Intermediate	Sharp
chr2	182321618	182323118	+	NM_000885	ITGA4	coding gene	Broad	Broad	Broad	Broad	Broad	Broad	Broad	Broad	Broad	Broad	Broad	Broad	Intermediate	Broad	Broad	Broad	Broad	Broad	Broad	Broad
chr16	31366508	31368008	+	NM_000887	ITGAX	coding gene	Non	Non	Non	Non	Non	Non	Sharp	Sharp	Sharp	Sharp	Non	Non	Non	Non	Non	Sharp	Non	Non	Non	Non
chr2	161055090	161056590	-	NM_000888	ITGB6	coding gene	Non	Non	Non	Non	Non	Non	Non	Non	Non	Non	Non	Non	Non	Non	Non	Non	Non	Non	Non	Non
chr12	53599500	53601000	-	NM_000889	ITGB7	coding gene	Non	Sharp	Sharp	Sharp	Non	Non	Sharp	Sharp	Sharp	Sharp	Sharp	Non	Non	Non	Sharp	Non	Sharp	Non	Sharp	Sharp
chr11	128761312	128762812	+	NM_000890	KCNJ5	coding gene	Non	Non	Non	Non	Non	Non	Non	Non	Non	Non	Non	Non	Non	Non	Non	Non	Non	Non	Non	Non
chr17	68165675	68167175	+	NM_000891	KCNJ2	coding gene	Sharp	Sharp	Sharp	Sharp	Non	Non	Intermediate	Sharp	Sharp	Intermediate	Sharp	Sharp	Non	Non	Sharp	Non	Sharp	Sharp	Sharp	Non
chr4	187148671	187150171	+	NM_000892	KLKB1	coding gene	Non	Non	Non	Non	Non	Non	Non	Non	Non	Non	Non	Non	Non	Non	Non	Non	Non	Non	Non	Non
chr3	186435097	186436597	+	NM_000893	KNG1	coding gene	Non	Non	Non	Non	Non	Non	Non	Non	Non	Non	Non	Non	Non	Non	Non	Non	Non	Non	Non	Non
chr19	49518847	49520347	-	NM_000894	LHB	coding gene	Non	Non	Non	Non	Non	Non	Non	Non	Non	Non	Non	Non	Non	Non	Non	Non	Non	Non	Non	Non
chr12	96427939	96429439	-	NM_000895	LTA4H	coding gene	Sharp	Sharp	Sharp	Sharp	Sharp	Intermediate	Sharp	Intermediate	Intermediate	Intermediate	Sharp	Sharp	Sharp	Sharp	Sharp	Intermadiate	Sharp	Sharp	Intermediate	Sharp
chr19	15751706	15753206	+	NM_000896	CYP4F3	coding gene	Non	Non	Non	Non	Non	Non	Non	Non	Non	Non	Non	Non	Non	Non	Non	Non	Non	Non	Non	Non
chrX	43740221	43741721	-	NM_000898	MAOB	coding gene	Non	Non	Sharp	Sharp	Non	Non	Sharp	Non	Sharp	Sharp	Sharp	Sharp	Non	Non	Non	Non	Non	Non	Non	Non
chr12	88972750	88974250	-	NM_000899	KITLG	coding gene	Non	Non	Sharp	Non	Non	Non	Non	Non	Non	Sharp	Non	Non	Non	Non	Non	Non	Non	Sharp	Non	Non
chr12	15037353	15038853	-	NM_000900	MGP	coding gene	Non	Non	Non	Non	Non	Non	Non	Sharp	Non	Non	Non	Sharp	Non	Sharp	Non	Sharp	Non	Non	Sharp	Non
chr4	149362172	149363672	-	NM_000901	NR3C2	coding gene	Broad	Broad	Broad	Broad	Sharp	Sharp	Broad	Broad	Broad	Sharp	Broad	Broad	Broad	Sharp	Sharp	Intermadiate	Intermediate	Intermediate	Intermediate	Sharp
chr3	154797435	154798935	+	NM_000902	MME	coding gene	Sharp	Sharp	Sharp	Sharp	Broad	Broad	Sharp	Non	Sharp	Broad	Sharp	Sharp	Sharp	Broad	Sharp	Sharp	Sharp	Broad	Intermediate	Non
chr16	69759033	69760533	-	NM_000903	NQO1	coding gene	Sharp	Sharp	Sharp	Sharp	Sharp	Sharp	Sharp	Sharp	Sharp	Sharp	Sharp	Sharp	Sharp	Sharp	Sharp	Sharp	Sharp	Sharp	Intermediate	Sharp
chr6	3000066	3001566	+	NM_000904	NQO2	coding gene	Sharp	Sharp	Sharp	Sharp	Sharp	Sharp	Sharp	Sharp	Sharp	Sharp	Sharp	Sharp	Sharp	Sharp	Sharp	Sharp	Sharp	Intermediate	Intermediate	Sharp
chr7	24323806	24325306	+	NM_000905	NPY	coding gene	Non	Non	Sharp	Sharp	Non	Non	Sharp	Non	Sharp	Sharp	Non	Sharp	Non	Non	Sharp	Non	Non	Sharp	Sharp	Non
chr1	153651163	153652663	+	NM_000906	NPR1	coding gene	Sharp	Sharp	Sharp	Sharp	Non	Non	Sharp	Non	Sharp	Sharp	Sharp	Sharp	Non	Non	Sharp	Non	Sharp	Sharp	Sharp	Non
chr5	32711437	32712937	+	NM_000908	NPR3	coding gene	Non	Non	Non	Non	Non	Non	Broad	Broad	Non	Intermediate	Sharp	Broad	Non	Non	Non	Non	Non	Sharp	Non	Non
chr4	164252447	164253947	-	NM_000909	NPY1R	coding gene	Non	Non	Non	Non	Non	Non	Sharp	Non	Non	Sharp	Non	Sharp	Non	Non	Non	Non	Non	Non	Non	Non
chr4	156129780	156131280	+	NM_000910	NPY2R	coding gene	Non	Non	Non	Non	Non	Non	Non	Non	Non	Non	Non	Non	Non	Non	Non	Non	Non	Non	Non	Non
chr1	29138653	29140153	+	NM_000911	OPRD1	coding gene	Non	Non	Non	Non	Non	Non	Non	Non	Non	Sharp	Sharp	Sharp	Non	Non	Non	Non	Non	Non	Non	Non
chr8	54162694	54164194	-	NM_000912	OPRK1	coding gene	Non	Non	Non	Non	Non	Non	Sharp	Non	Non	Sharp	Non	Non	Non	Non	Non	Non	Non	Non	Non	Non
chr20	62711470	62712970	+	NM_000913	OPRL1	coding gene	Intermediate	Broad	Broad	Intermediate	Intermediate	Intermediate	Broad	Broad	Broad	Broad	Broad	Intermediate	Non	Sharp	Intermediate	Non	Intermediate	Broad	Broad	Intermediate
chr6	154360442	154361942	+	NM_000914	OPRM1	coding gene	Non	Non	Non	Non	Non	Non	Non	Non	Non	Non	Non	Non	Non	Non	Non	Non	Non	Non	Non	Non
chr20	3052265	3053765	+	NM_000915	OXT	coding gene	Sharp	Sharp	Sharp	Sharp	Non	Non	Sharp	Non	Sharp	Sharp	Sharp	Sharp	Non	Non	Non	Sharp	Non	Non	Sharp	Sharp
chr3	8809800	8811300	-	NM_000916	OXTR	coding gene	Non	Non	Sharp	Non	Non	Non	Sharp	Non	Sharp	Sharp	Non	Sharp	Non	Non	Sharp	Non	Sharp	Non	Non	Non
chr10	74855232	74856732	-	NM_000917	P4HA1	coding gene	Sharp	Sharp	Intermediate	Sharp	Sharp	Intermediate	Intermediate	Intermediate	Sharp	Sharp	Sharp	Intermediate	Sharp	Intermediate	Intermediate	Broad	Intermediate	Sharp	Intermediate	Sharp
chr17	79817044	79818544	-	NM_000918	P4HB	coding gene	Intermediate	Intermediate	Intermediate	Sharp	Intermediate	Intermediate	Intermediate	Intermediate	Intermediate	Intermediate	Intermediate	Intermediate	Sharp	Broad	Sharp	Broad	Intermediate	Sharp	Broad	Intermediate
chr5	102201526	102203026	+	NM_000919	PAM	coding gene	Sharp	Sharp	Sharp	Sharp	Non	Sharp	Sharp	Intermediate	Sharp	Sharp	Sharp	Sharp	Sharp	Non	Non	Non	Non	Non	Sharp	Non
chr11	66724347	66725847	-	NM_000920	PC	coding gene	Sharp	Sharp	Sharp	Sharp	Sharp	Non	Sharp	Sharp	Sharp	Sharp	Sharp	Sharp	Sharp	Sharp	Sharp	Sharp	Sharp	Sharp	Non	Non
chr12	20522178	20523678	+	NM_000921	PDE3A	coding gene	Sharp	Sharp	Sharp	Sharp	Non	Non	Sharp	Non	Sharp	Sharp	Sharp	Sharp	Non	Non	Non	Non	Non	Sharp	Sharp	Non
chr11	14665268	14666768	+	NM_000922	PDE3B	coding gene	Intermediate	Sharp	Intermediate	Broad	Broad	Broad	Broad	Broad	Intermediate	Broad	Broad	Broad	Intermediate	Broad	Broad	Broad	Intermediate	Broad	Broad	Broad
chr19	18357510	18359010	-	NM_000923	PDE4C	coding gene	Non	Non	Non	Non	Non	Non	Non	Non	Non	Non	Non	Non	Non	Non	Non	Non	Non	Non	Non	Non
chr12	54943176	54944676	+	NM_000924	PDE1B	coding gene	Sharp	Sharp	Sharp	Sharp	Sharp	Sharp	Sharp	Sharp	Sharp	Sharp	Sharp	Sharp	Sharp	Non	Non	Non	Non	Non	Sharp	Non
chr3	58418079	58419579	-	NM_000925	PDHB	coding gene	Sharp	Sharp	Sharp	Sharp	Sharp	Sharp	Sharp	Sharp	Sharp	Sharp	Sharp	Sharp	Sharp	Sharp	Sharp	Sharp	Sharp	Sharp	Sharp	Sharp
chr11	100999044	101000544	-	NM_000926	PGR	coding gene	Non	Non	Non	Non	Non	Non	Non	Non	Non	Non	Non	Non	Non	Non	Non	Non	Non	Non	Non	Non
chr7	87341139	87342639	-	NM_000927	ABCB1	coding gene	Non	Non	Non	Non	Non	Non	Non	Non	Non	Non	Non	Non	Non	Non	Non	Non	Non	Non	Non	Non
chr12	120764092	120765592	-	NM_000928	PLA2G1B	coding gene	Non	Non	Non	Non	Non	Non	Sharp	Sharp	Non	Sharp	Non	Non	Non	Sharp	Sharp	Non	Non	Sharp	Non	Sharp
chr1	20396700	20398200	+	NM_000929	PLA2G5	coding gene	Non	Non	Non	Non	Non	Non	Non	Non	Non	Non	Non	Non	Non	Non	Non	Non	Non	Non	Non	Non
chr8	42063694	42065194	-	NM_000930	PLAT	coding gene	Non	Non	Non	Non	Non	Non	Non	Non	Non	Non	Non	Non	Non	Non	Non	Non	Non	Non	Non	Non
chr11	64018994	64020494	+	NM_000932	PLCB3	coding gene	Sharp	Sharp	Sharp	Sharp	Sharp	Sharp	Sharp	Sharp	Sharp	Sharp	Sharp	Sharp	Sharp	Broad	Sharp	Sharp	Sharp	Sharp	Intermediate	Sharp
chr20	9288446	9289946	+	NM_000933	PLCB4	coding gene	Non	Non	Non	Non	Non	Non	Non	Non	Non	Non	Non	Non	Non	Non	Non	Non	Non	Non	Non	Non
chr17	1646129	1647629	+	NM_000934	SERPINF2	coding gene	Non	Non	Non	Non	Non	Non	Non	Non	Non	Non	Non	Non	Non	Non	Non	Non	Non	Non	Non	Non
chr3	145877782	145879282	-	NM_000935	PLOD2	coding gene	Non	Non	Non	Sharp	Non	Non	Sharp	Non	Sharp	Sharp	Non	Non	Non	Non	Non	Non	Non	Non	Non	Non
chr10	118305427	118306927	+	NM_000936	PNLIP	coding gene	Non	Non	Non	Non	Non	Non	Non	Non	Non	Non	Non	Non	Non	Non	Non	Non	Non	Non	Non	Non
chr17	7387697	7389197	+	NM_000937	POLR2A	coding gene	Intermediate	Intermediate	Intermediate	Intermediate	Sharp	Intermediate	Broad	Broad	Broad	Broad	Intermediate	Broad	Sharp	Broad	Sharp	Broad	Broad	Broad	Broad	Intermediate
chr4	57845108	57846608	+	NM_000938	POLR2B	coding gene	Broad	Broad	Broad	Broad	Intermediate	Broad	Broad	Broad	Broad	Broad	Broad	Broad	Intermediate	Broad	Broad	Broad	Broad	Broad	Broad	Broad
chr2	25390059	25391559	-	NM_000939	POMC	coding gene	Non	Sharp	Sharp	Sharp	Sharp	Sharp	Sharp	Sharp	Sharp	Sharp	Sharp	Sharp	Sharp	Non	Non	Non	Non	Non	Non	Non
chr7	95024187	95025687	-	NM_000940	PON3	coding gene	Sharp	Sharp	Sharp	Sharp	Non	Non	Sharp	Non	Sharp	Sharp	Non	Non	Non	Non	Non	Non	Non	Non	Non	Non
chr7	75544419	75545919	+	NM_000941	POR	coding gene	Sharp	Sharp	Sharp	Sharp	Sharp	Sharp	Sharp	Sharp	Sharp	Sharp	Sharp	Sharp	Sharp	Sharp	Sharp	Sharp	Sharp	Sharp	Sharp	Sharp
chr15	64453854	64455354	-	NM_000942	PPIB	coding gene	Sharp	Sharp	Sharp	Sharp	Sharp	Intermediate	Sharp	Intermediate	Sharp	Sharp	Sharp	Intermediate	Sharp	Sharp	Sharp	Broad	Sharp	Sharp	Intermediate	Intermediate
chr5	122370925	122372425	-	NM_000943	PPIC	coding gene	Non	Non	Non	Non	Non	Non	Non	Non	Sharp	Non	Non	Non	Non	Non	Non	Non	Non	Non	Sharp	Non
chr4	102267128	102268628	-	NM_000944	PPP3CA	coding gene	Intermediate	Intermediate	Intermediate	Intermediate	Intermediate	Intermediate	Intermediate	Broad	Intermediate	Intermediate	Intermediate	Intermediate	Intermediate	Intermediate	Intermediate	Broad	Intermediate	Intermediate	Intermediate	Intermediate
chr2	68478151	68479651	-	NM_000945	PPP3R1	coding gene	Broad	Intermediate	Intermediate	Broad	Intermediate	Broad	Broad	Broad	Broad	Broad	Broad	Broad	Intermediate	Broad	Broad	Broad	Intermediate	Intermediate	Broad	Broad
chr12	57144646	57146146	-	NM_000946	PRIM1	coding gene	Sharp	Sharp	Sharp	Sharp	Sharp	Sharp	Sharp	Sharp	Sharp	Sharp	Sharp	Sharp	Sharp	Sharp	Sharp	Sharp	Sharp	Sharp	Intermediate	Sharp
chr6	57182421	57183921	+	NM_000947	PRIM2	coding gene	Sharp	Sharp	Sharp	Sharp	Sharp	Sharp	Sharp	Sharp	Sharp	Sharp	Sharp	Sharp	Sharp	Intermediate	Sharp	Broad	Sharp	Sharp	Intermediate	Intermediate
chr6	22296230	22297730	-	NM_000948	PRL	coding gene	Non	Non	Non	Non	Non	Non	Non	Non	Non	Non	Non	Non	Non	Non	Non	Non	Non	Non	Non	Non
chr5	35229323	35230823	-	NM_000949	PRLR	coding gene	Non	Non	Non	Non	Non	Non	Non	Non	Sharp	Sharp	Non	Non	Non	Non	Non	Non	Non	Non	Non	Non
chrX	37208527	37210027	+	NM_000950	PRRG1	coding gene	Non	Non	Sharp	Non	Non	Non	Sharp	Non	Sharp	Sharp	Non	Non	Non	Non	Non	Non	Non	Non	Non	Non
chr19	50084586	50086086	+	NM_000951	PRRG2	coding gene	Non	Non	Non	Non	Non	Non	Non	Non	Non	Non	Non	Non	Non	Sharp	Sharp	Non	Non	Non	Non	Non
chr1	28501955	28503455	-	NM_000952	PTAFR	coding gene	Non	Non	Non	Non	Non	Non	Sharp	Sharp	Sharp	Sharp	Non	Non	Non	Non	Non	Non	Non	Non	Non	Non
chr14	52734430	52735930	+	NM_000953	PTGDR	coding gene	Sharp	Non	Sharp	Sharp	Non	Broad	Sharp	Sharp	Sharp	Sharp	Sharp	Sharp	Non	Broad	Non	Intermadiate	Non	Non	Sharp	Sharp
chr9	139871955	139873455	+	NM_000954	PTGDS	coding gene	Non	Sharp	Sharp	Sharp	Non	Non	Sharp	Non	Sharp	Sharp	Non	Non	Non	Non	Sharp	Non	Non	Non	Non	Non
chr19	14584674	14586174	-	NM_000955	PTGER1	coding gene	Non	Non	Non	Non	Non	Non	Non	Sharp	Non	Sharp	Non	Non	Non	Non	Non	Non	Non	Non	Sharp	Sharp
chr14	52781015	52782515	+	NM_000956	PTGER2	coding gene	Sharp	Sharp	Sharp	Sharp	Non	Broad	Broad	Broad	Intermediate	Broad	Intermediate	Sharp	Sharp	Broad	Non	Broad	Sharp	Non	Sharp	Broad
chr5	40680031	40681531	+	NM_000958	PTGER4	coding gene	Broad	Broad	Broad	Broad	Broad	Broad	Broad	Broad	Broad	Broad	Broad	Broad	Intermediate	Broad	Broad	Broad	Broad	Broad	Intermediate	Broad
chr1	78956727	78958227	+	NM_000959	PTGFR	coding gene	Non	Non	Non	Non	Non	Non	Non	Non	Non	Non	Non	Non	Non	Non	Non	Non	Non	Non	Non	Non
chr19	47126854	47128354	-	NM_000960	PTGIR	coding gene	Non	Sharp	Intermediate	Sharp	Non	Non	Non	Non	Non	Non	Non	Sharp	Non	Non	Sharp	Non	Non	Sharp	Sharp	Non
chr20	48183207	48184707	-	NM_000961	PTGIS	coding gene	Non	Non	Non	Non	Non	Non	Non	Non	Non	Non	Non	Non	Non	Non	Non	Non	Non	Non	Non	Non
chr9	125133228	125134728	+	NM_000962	PTGS1	coding gene	Non	Non	Non	Non	Sharp	Non	Sharp	Sharp	Sharp	Sharp	Sharp	Sharp	Non	Non	Non	Sharp	Non	Non	Non	Non
chr1	186648059	186649559	-	NM_000963	PTGS2	coding gene	Sharp	Sharp	Sharp	Sharp	Non	Non	Sharp	Sharp	Sharp	Sharp	Non	Sharp	Non	Non	Non	Non	Non	Non	Non	Non
chr17	38465422	38466922	+	NM_000964	RARA	coding gene	Sharp	Sharp	Sharp	Sharp	Non	Non	Sharp	Non	Sharp	Sharp	Sharp	Sharp	Non	Non	Non	Broad	Non	Sharp	Non	Non
chr3	25469833	25471333	+	NM_000965	RARB	coding gene	Non	Non	Non	Non	Sharp	Non	Non	Non	Non	Non	Non	Non	Non	Non	Non	Non	Non	Non	Non	Non
chr12	53624540	53626040	-	NM_000966	RARG	coding gene	Sharp	Sharp	Sharp	Sharp	Sharp	Sharp	Sharp	Sharp	Sharp	Sharp	Sharp	Sharp	Non	Sharp	Sharp	Non	Sharp	Sharp	Intermediate	Sharp
chr22	39714170	39715670	-	NM_000967	RPL3	coding gene	Intermediate	Sharp	Intermediate	Intermediate	Intermediate	Broad	Broad	Broad	Broad	Broad	Intermediate	Intermediate	Sharp	Broad	Intermediate	Broad	Intermediate	Broad	Broad	Broad
chr15	66795693	66797193	-	NM_000968	RPL4	coding gene	Intermediate	Intermediate	Sharp	Intermediate	Sharp	Broad	Intermediate	Intermediate	Intermediate	Intermediate	Intermediate	Intermediate	Sharp	Broad	Intermediate	Broad	Intermediate	Intermediate	Broad	Broad
chr1	93297593	93299093	+	NM_000969	RPL5	coding gene	Sharp	Sharp	Sharp	Sharp	Sharp	Broad	Sharp	Intermediate	Intermediate	Intermediate	Sharp	Intermediate	Sharp	Sharp	Intermediate	Broad	Intermediate	Intermediate	Broad	Intermediate
chr12	112845943	112847443	-	NM_000970	RPL6	coding gene	Sharp	Sharp	Sharp	Sharp	Sharp	Sharp	Sharp	Intermediate	Sharp	Sharp	Sharp	Sharp	Sharp	Intermediate	Sharp	Intermadiate	Sharp	Sharp	Intermediate	Sharp
chr8	74204369	74205869	-	NM_000971	RPL7	coding gene	Intermediate	Intermediate	Intermediate	Intermediate	Intermediate	Broad	Intermediate	Intermediate	Intermediate	Sharp	Intermediate	Intermediate	Intermediate	Broad	Sharp	Broad	Broad	Intermediate	Broad	Broad
chr9	136215068	136216568	+	NM_000972	RPL7A	coding gene	Intermediate	Intermediate	Sharp	Intermediate	Sharp	Intermediate	Intermediate	Intermediate	Intermediate	Intermediate	Intermediate	Intermediate	Sharp	Intermediate	Intermediate	Intermadiate	Intermediate	Sharp	Intermediate	Intermediate
chr8	146016305	146017805	-	NM_000973	RPL8	coding gene	Sharp	Sharp	Sharp	Sharp	Sharp	Intermediate	Sharp	Intermediate	Sharp	Sharp	Sharp	Sharp	Sharp	Broad	Intermediate	Intermadiate	Sharp	Sharp	Intermediate	Sharp
chr1	24018268	24019768	+	NM_000975	RPL11	coding gene	Sharp	Sharp	Sharp	Sharp	Sharp	Sharp	Sharp	Intermediate	Sharp	Sharp	Sharp	Sharp	Sharp	Broad	Sharp	Broad	Sharp	Intermediate	Broad	Sharp
chr9	130212211	130213711	-	NM_000976	RPL12	coding gene	Intermediate	Intermediate	Intermediate	Intermediate	Intermediate	Intermediate	Intermediate	Broad	Intermediate	Intermediate	Sharp	Intermediate	Sharp	Intermediate	Intermediate	Intermadiate	Intermediate	Intermediate	Intermediate	Intermediate
chr16	89627064	89628564	+	NM_000977	RPL13	coding gene	Sharp	Intermediate	Sharp	Sharp	Intermediate	Broad	Intermediate	Intermediate	Intermediate	Intermediate	Sharp	Intermediate	Sharp	Intermediate	Intermediate	Intermadiate	Intermediate	Intermediate	Broad	Intermediate
chr17	37008553	37010053	-	NM_000978	RPL23	coding gene	Intermediate	Sharp	Intermediate	Intermediate	Intermediate	Broad	Intermediate	Broad	Broad	Intermediate	Intermediate	Intermediate	Non	Intermediate	Intermediate	Broad	Intermediate	Intermediate	Intermediate	Intermediate
chr19	49120933	49122433	-	NM_000979	RPL18	coding gene	Intermediate	Sharp	Sharp	Sharp	Sharp	Intermediate	Sharp	Intermediate	Intermediate	Intermediate	Sharp	Intermediate	Sharp	Intermediate	Intermediate	Intermadiate	Intermediate	Intermediate	Broad	Intermediate
chr19	17970730	17972230	+	NM_000980	RPL18A	coding gene	Sharp	Sharp	Sharp	Sharp	Sharp	Sharp	Sharp	Intermediate	Sharp	Sharp	Sharp	Sharp	Sharp	Sharp	Intermediate	Sharp	Sharp	Sharp	Intermediate	Sharp
chr17	37356535	37358035	+	NM_000981	RPL19	coding gene	Sharp	Sharp	Sharp	Sharp	Sharp	Intermediate	Sharp	Broad	Sharp	Sharp	Sharp	Broad	Sharp	Broad	Broad	Broad	Intermediate	Broad	Broad	Sharp
chr13	27825691	27827191	+	NM_000982	RPL21	coding gene	Intermediate	Sharp	Intermediate	Sharp	Sharp	Intermediate	Intermediate	Intermediate	Intermediate	Intermediate	Intermediate	Intermediate	Sharp	Broad	Intermediate	Broad	Intermediate	Intermediate	Broad	Intermediate
chr1	6258179	6259679	-	NM_000983	RPL22	coding gene	Sharp	Sharp	Sharp	Sharp	Sharp	Intermediate	Sharp	Sharp	Sharp	Sharp	Sharp	Sharp	Sharp	Intermediate	Intermediate	Intermadiate	Sharp	Sharp	Intermediate	Sharp
chr17	27046999	27048499	+	NM_000984	RPL23A	coding gene	Sharp	Sharp	Intermediate	Sharp	Sharp	Intermediate	Sharp	Intermediate	Intermediate	Sharp	Sharp	Sharp	Sharp	Intermediate	Intermediate	Intermadiate	Sharp	Intermediate	Broad	Intermediate
chr18	47017435	47018935	-	NM_000985	RPL17	coding gene	Sharp	Sharp	Sharp	Sharp	Sharp	Sharp	Sharp	Sharp	Sharp	Sharp	Sharp	Sharp	Sharp	Broad	Sharp	Broad	Sharp	Sharp	Broad	Broad
chr3	101404063	101405563	-	NM_000986	RPL24	coding gene	Sharp	Sharp	Sharp	Intermediate	Sharp	Intermediate	Intermediate	Intermediate	Intermediate	Intermediate	Intermediate	Intermediate	Sharp	Intermediate	Intermediate	Broad	Sharp	Intermediate	Intermediate	Intermediate
chr17	8285065	8286565	-	NM_000987	RPL26	coding gene	Intermediate	Sharp	Sharp	Intermediate	Intermediate	Broad	Intermediate	Intermediate	Intermediate	Intermediate	Intermediate	Intermediate	Sharp	Broad	Broad	Broad	Intermediate	Intermediate	Broad	Intermediate
chr17	41150445	41151945	+	NM_000988	RPL27	coding gene	Sharp	Sharp	Sharp	Sharp	Sharp	Intermediate	Sharp	Intermediate	Sharp	Sharp	Sharp	Sharp	Sharp	Sharp	Intermediate	Intermadiate	Sharp	Sharp	Intermediate	Intermediate
chr8	99056318	99057818	-	NM_000989	RPL30	coding gene	Intermediate	Intermediate	Intermediate	Sharp	Sharp	Broad	Intermediate	Broad	Intermediate	Intermediate	Sharp	Intermediate	Sharp	Intermediate	Intermediate	Intermadiate	Intermediate	Intermediate	Intermediate	Intermediate
chr11	8703994	8705494	+	NM_000990	RPL27A	coding gene	Intermediate	Sharp	Intermediate	Sharp	Sharp	Intermediate	Sharp	Intermediate	Intermediate	Intermediate	Sharp	Sharp	Sharp	Intermediate	Intermediate	Intermadiate	Sharp	Sharp	Intermediate	Intermediate
chr19	55897299	55898799	+	NM_000991	RPL28	coding gene	Broad	Broad	Broad	Broad	Intermediate	Broad	Broad	Broad	Broad	Broad	Broad	Broad	Sharp	Broad	Broad	Broad	Broad	Broad	Broad	Broad
chr3	52028458	52029958	-	NM_000992	RPL29	coding gene	Sharp	Sharp	Sharp	Sharp	Sharp	Sharp	Sharp	Sharp	Sharp	Sharp	Sharp	Sharp	Sharp	Sharp	Sharp	Intermadiate	Sharp	Sharp	Intermediate	Sharp
chr2	101618690	101620190	+	NM_000993	RPL31	coding gene	Sharp	Sharp	Sharp	Sharp	Sharp	Sharp	Sharp	Sharp	Sharp	Sharp	Sharp	Sharp	Sharp	Intermediate	Sharp	Broad	Sharp	Broad	Intermediate	Sharp
chr3	12881581	12883081	-	NM_000994	RPL32	coding gene	Sharp	Sharp	Sharp	Sharp	Sharp	Intermediate	Sharp	Intermediate	Intermediate	Sharp	Sharp	Intermediate	Sharp	Broad	Intermediate	Broad	Sharp	Intermediate	Broad	Intermediate
chr4	109541721	109543221	+	NM_000995	RPL34	coding gene	Intermediate	Intermediate	Intermediate	Intermediate	Sharp	Intermediate	Sharp	Intermediate	Sharp	Sharp	Sharp	Sharp	Sharp	Broad	Broad	Broad	Intermediate	Intermediate	Broad	Intermediate
chr3	197677051	197678551	+	NM_000996	RPL35A	coding gene	Sharp	Sharp	Sharp	Sharp	Sharp	Intermediate	Sharp	Intermediate	Sharp	Intermediate	Intermediate	Sharp	Sharp	Intermediate	Intermediate	Broad	Sharp	Sharp	Broad	Intermediate
chr5	40833887	40835387	-	NM_000997	RPL37	coding gene	Intermediate	Sharp	Sharp	Intermediate	Sharp	Intermediate	Sharp	Intermediate	Intermediate	Intermediate	Sharp	Sharp	Sharp	Intermediate	Intermediate	Intermadiate	Sharp	Broad	Broad	Intermediate
chr2	217363519	217365019	+	NM_000998	RPL37A	coding gene	Sharp	Sharp	Sharp	Sharp	Sharp	Broad	Sharp	Intermediate	Intermediate	Intermediate	Sharp	Sharp	Sharp	Intermediate	Intermediate	Broad	Intermediate	Intermediate	Broad	Intermediate
chr17	72199794	72201294	+	NM_000999	RPL38	coding gene	Sharp	Sharp	Sharp	Sharp	Sharp	Sharp	Sharp	Sharp	Sharp	Sharp	Sharp	Sharp	Sharp	Sharp	Intermediate	Intermadiate	Sharp	Sharp	Intermediate	Sharp
chrX	118924106	118925606	-	NM_001000	RPL39	coding gene	Sharp	Sharp	Sharp	Intermediate	Intermediate	Broad	Intermediate	Broad	Intermediate	Intermediate	Intermediate	Intermediate	Sharp	Broad	Intermediate	Broad	Broad	Broad	Broad	Broad
chr14	50085849	50087349	-	NM_001001	RPL36AL	coding gene	Intermediate	Intermediate	Intermediate	Intermediate	Sharp	Broad	Intermediate	Broad	Intermediate	Broad	Intermediate	Intermediate	Sharp	Broad	Intermediate	Broad	Broad	Broad	Broad	Broad
chr21	35014783	35016283	+	NM_001001132	ITSN1	coding gene	Intermediate	Intermediate	Intermediate	Sharp	Sharp	Broad	Intermediate	Broad	Sharp	Intermediate	Intermediate	Intermediate	Intermediate	Intermediate	Intermediate	Broad	Intermediate	Intermediate	Intermediate	Intermediate
chr4	10040372	10041872	-	NM_001001290	SLC2A9	coding gene	Non	Non	Non	Non	Non	Non	Non	Non	Non	Non	Non	Non	Non	Non	Non	Non	Non	Non	Non	Non
chr7	141956378	141957878	-	NM_001001317	PRSS58	coding gene	Non	Non	Non	Non	Non	Non	Non	Non	Non	Non	Non	Non	Non	Non	Non	Non	Non	Non	Non	Non
chr12	90048344	90049844	-	NM_001001323	ATP2B1	coding gene	Non	Non	Non	Non	Non	Non	Non	Non	Non	Non	Non	Non	Non	Non	Non	Non	Non	Non	Non	Non
chr5	147549295	147550795	+	NM_001001325	SPINK14	coding gene	Non	Non	Non	Non	Non	Non	Non	Non	Non	Non	Non	Non	Non	Non	Non	Non	Non	Non	Non	Non
chr19	11546268	11547768	+	NM_001001329	PRKCSH	coding gene	Sharp	Sharp	Sharp	Sharp	Sharp	Sharp	Sharp	Sharp	Sharp	Sharp	Sharp	Sharp	Sharp	Sharp	Sharp	Sharp	Sharp	Sharp	Intermediate	Sharp
chr10	65281122	65282622	+	NM_001001330	REEP3	coding gene	Sharp	Sharp	Sharp	Sharp	Intermediate	Intermediate	Sharp	Intermediate	Sharp	Sharp	Sharp	Sharp	Sharp	Broad	Sharp	Broad	Sharp	Intermediate	Intermediate	Intermediate
chr3	10545768	10547268	-	NM_001001331	ATP2B2	coding gene	Non	Non	Sharp	Sharp	Non	Non	Sharp	Sharp	Sharp	Sharp	Sharp	Sharp	Non	Non	Non	Non	Non	Sharp	Non	Non
chr10	102044614	102046114	-	NM_001001342	BLOC1S2	coding gene	Sharp	Sharp	Sharp	Sharp	Sharp	Sharp	Sharp	Sharp	Sharp	Sharp	Sharp	Sharp	Sharp	Sharp	Sharp	Broad	Sharp	Sharp	Sharp	Sharp
chr5	156771229	156772729	-	NM_001001343	FNDC9	coding gene	Non	Non	Non	Non	Non	Non	Non	Non	Non	Non	Non	Non	Non	Non	Non	Non	Non	Non	Non	Non
chrX	152801579	152803079	+	NM_001001344	ATP2B3	coding gene	Non	Non	Non	Non	Non	Non	Non	Non	Non	Non	Non	Non	Non	Non	Non	Non	Non	Non	Non	Non
chr6	155585146	155586646	+	NM_001001346	CLDN20	coding gene	Non	Non	Non	Non	Non	Non	Non	Non	Non	Non	Non	Non	Non	Non	Non	Non	Non	Non	Non	Non
chr17	40169593	40171093	+	NM_001001349	NKIRAS2	coding gene	Intermediate	Sharp	Sharp	Sharp	Sharp	Intermediate	Sharp	Intermediate	Sharp	Sharp	Sharp	Sharp	Sharp	Broad	Intermediate	Sharp	Sharp	Sharp	Broad	Sharp
chr11	35160416	35161916	+	NM_001001389	CD44	coding gene	Sharp	Broad	Broad	Broad	Sharp	Sharp	Intermediate	Broad	Intermediate	Intermediate	Intermediate	Intermediate	Sharp	Broad	Non	Broad	Sharp	Intermediate	Intermediate	Sharp
chr11	35160416	35161916	+	NM_001001390	CD44	coding gene	Sharp	Broad	Broad	Broad	Sharp	Sharp	Intermediate	Broad	Intermediate	Intermediate	Intermediate	Intermediate	Sharp	Broad	Non	Broad	Sharp	Intermediate	Intermediate	Sharp
chr11	35160416	35161916	+	NM_001001391	CD44	coding gene	Sharp	Broad	Broad	Broad	Sharp	Sharp	Intermediate	Broad	Intermediate	Intermediate	Intermediate	Intermediate	Sharp	Broad	Non	Broad	Sharp	Intermediate	Intermediate	Sharp
chr11	35160416	35161916	+	NM_001001392	CD44	coding gene	Sharp	Broad	Broad	Broad	Sharp	Sharp	Intermediate	Broad	Intermediate	Intermediate	Intermediate	Intermediate	Sharp	Broad	Non	Broad	Sharp	Intermediate	Intermediate	Sharp
chr2	234651161	234652661	-	NM_001001394	DNAJB3	coding gene	Non	Non	Non	Non	Non	Non	Non	Non	Non	Non	Non	Non	Non	Non	Non	Non	Non	Non	Non	Non
chr12	16759648	16761148	-	NM_001001395	LMO3	coding gene	Non	Non	Non	Non	Non	Non	Non	Non	Non	Non	Non	Non	Non	Non	Non	Non	Non	Sharp	Non	Non
chr1	203595914	203597414	+	NM_001001396	ATP2B4	coding gene	Broad	Broad	Broad	Broad	Broad	Broad	Broad	Broad	Broad	Broad	Broad	Broad	Intermediate	Broad	Broad	Broad	Intermediate	Broad	Broad	Intermediate
chr16	1400373	1401873	-	NM_001001410	TSR3	coding gene	Sharp	Sharp	Sharp	Sharp	Sharp	Sharp	Sharp	Sharp	Sharp	Sharp	Sharp	Intermediate	Sharp	Intermediate	Intermediate	Sharp	Sharp	Sharp	Intermediate	Sharp
chr19	22378253	22379753	-	NM_001001411	ZNF676	coding gene	Non	Non	Non	Non	Non	Non	Non	Non	Non	Non	Non	Non	Non	Non	Non	Non	Non	Non	Non	Non
chr10	105217148	105218648	-	NM_001001412	CALHM1	coding gene	Non	Non	Non	Non	Non	Non	Non	Non	Non	Non	Non	Non	Non	Non	Non	Non	Non	Non	Sharp	Non
chr15	22736245	22737745	+	NM_001001413	GOLGA6L1	coding gene	Non	Non	Non	Non	Non	Non	Non	Non	Non	Non	Non	Non	Non	Non	Non	Non	Non	Non	Non	Non
chr19	39687603	39689103	+	NM_001001414	NCCRP1	coding gene	Non	Non	Non	Non	Non	Non	Non	Non	Non	Non	Non	Sharp	Non	Non	Non	Non	Non	Non	Non	Non
chr19	21688436	21689936	+	NM_001001415	ZNF429	coding gene	Sharp	Sharp	Sharp	Sharp	Sharp	Sharp	Sharp	Sharp	Sharp	Sharp	Sharp	Sharp	Sharp	Sharp	Sharp	Sharp	Sharp	Sharp	Sharp	Sharp
chr17	34502488	34503988	-	NM_001001417	TBC1D3B	coding gene	Non	Non	Non	Non	Non	Non	Non	Non	Non	Non	Non	Non	Non	Non	Non	Non	Non	Non	Non	Non
chr17	34590532	34592032	-	NM_001001418	TBC1D3C	coding gene	Non	Non	Non	Non	Non	Non	Non	Non	Non	Non	Non	Non	Non	Non	Non	Non	Non	Non	Non	Non
chr5	135468535	135470035	+	NM_001001419	SMAD5	coding gene	Sharp	Sharp	Sharp	Sharp	Sharp	Intermediate	Sharp	Sharp	Sharp	Sharp	Sharp	Sharp	Sharp	Non	Sharp	Broad	Sharp	Sharp	Intermediate	Intermediate
chr5	135468535	135470035	+	NM_001001420	SMAD5	coding gene	Sharp	Sharp	Sharp	Sharp	Sharp	Intermediate	Sharp	Sharp	Sharp	Sharp	Sharp	Sharp	Sharp	Non	Sharp	Broad	Sharp	Sharp	Intermediate	Intermediate
chr1	201345305	201346805	-	NM_001001430	TNNT2	coding gene	Non	Non	Non	Non	Non	Non	Non	Non	Non	Non	Non	Non	Non	Non	Non	Non	Non	Non	Non	Non
chr1	201345305	201346805	-	NM_001001431	TNNT2	coding gene	Non	Non	Non	Non	Non	Non	Non	Non	Non	Non	Non	Non	Non	Non	Non	Non	Non	Non	Non	Non
chr1	201345305	201346805	-	NM_001001432	TNNT2	coding gene	Non	Non	Non	Non	Non	Non	Non	Non	Non	Non	Non	Non	Non	Non	Non	Non	Non	Non	Non	Non
chr20	57226308	57227808	+	NM_001001433	STX16	coding gene	Broad	Intermediate	Intermediate	Intermediate	Intermediate	Broad	Broad	Broad	Broad	Broad	Broad	Intermediate	Intermediate	Broad	Intermediate	Broad	Intermediate	Intermediate	Broad	Broad
chr17	34538467	34539967	+	NM_001001435	None	coding gene	Non	Non	Non	Non	Non	Non	Non	Non	Non	Non	Non	Non	Non	Non	Non	Non	Non	Non	Non	Non
chr17	34640033	34641533	+	NM_001001435_1	None	coding gene	Non	Non	Non	Non	Non	Non	Non	Non	Non	Non	Non	Non	Non	Non	Non	Non	Non	Non	Non	Non
chr16	46863574	46865074	-	NM_001001436	C16orf87	coding gene	Sharp	Sharp	Sharp	Sharp	Sharp	Intermediate	Sharp	Intermediate	Sharp	Sharp	Sharp	Sharp	Sharp	Sharp	Sharp	Broad	Sharp	Sharp	Intermediate	Intermediate
chr17	34522647	34524147	-	NM_001001437	CCL3L3	coding gene	Non	Non	Non	Non	Non	Non	Non	Non	Non	Non	Non	Non	Non	Non	Non	Non	Non	Non	Non	Non
chr17	34624221	34625721	-	NM_001001437_1	None	coding gene	Non	Non	Non	Non	Non	Non	Non	Non	Non	Non	Non	Non	Non	Non	Non	Non	Non	Non	Non	Non
chr21	47647238	47648738	-	NM_001001438	LSS	coding gene	Sharp	Intermediate	Sharp	Sharp	Sharp	Broad	Intermediate	Intermediate	Sharp	Intermediate	Intermediate	Sharp	Sharp	Broad	Sharp	Broad	Intermediate	Intermediate	Intermediate	Broad
chr22	31031792	31033292	+	NM_001001479	SLC35E4	coding gene	Sharp	Sharp	Sharp	Sharp	Sharp	Sharp	Sharp	Sharp	Sharp	Sharp	Sharp	Sharp	Sharp	Sharp	Sharp	Sharp	Sharp	Sharp	Intermediate	Non
chr11	1651032	1652532	+	NM_001001480	KRTAP5-5	coding gene	Non	Non	Non	Non	Non	Non	Non	Non	Non	Non	Non	Non	Non	Non	Non	Non	Non	Non	Non	Non
chr8	74789610	74791110	-	NM_001001481	UBE2W	coding gene	Sharp	Sharp	Sharp	Sharp	Sharp	Intermediate	Intermediate	Intermediate	Sharp	Intermediate	Intermediate	Sharp	Sharp	Sharp	Sharp	Sharp	Sharp	Sharp	Intermediate	Sharp
chr11	19138691	19140191	+	NM_001001483	ZDHHC13	coding gene	Sharp	Sharp	Sharp	Sharp	Sharp	Sharp	Sharp	Sharp	Sharp	Sharp	Sharp	Sharp	Sharp	Sharp	Sharp	Broad	Sharp	Sharp	Sharp	Sharp
chr10	16478966	16480466	+	NM_001001484	PTER	coding gene	Sharp	Sharp	Sharp	Sharp	Sharp	Sharp	Sharp	Sharp	Sharp	Sharp	Sharp	Sharp	Sharp	Intermediate	Sharp	Broad	Sharp	Broad	Broad	Intermediate
chr3	130612858	130614358	+	NM_001001485	ATP2C1	coding gene	Intermediate	Intermediate	Intermediate	Intermediate	Sharp	Broad	Broad	Broad	Intermediate	Intermediate	Intermediate	Intermediate	Sharp	Intermediate	Intermediate	Broad	Sharp	Sharp	Intermediate	Intermediate
chr3	130613433	130614933	+	NM_001001486	ATP2C1	coding gene	Intermediate	Intermediate	Intermediate	Intermediate	Sharp	Broad	Broad	Broad	Intermediate	Intermediate	Intermediate	Intermediate	Sharp	Intermediate	Intermediate	Broad	Sharp	Sharp	Intermediate	Intermediate
chr3	130613433	130614933	+	NM_001001487	ATP2C1	coding gene	Intermediate	Intermediate	Intermediate	Intermediate	Sharp	Broad	Broad	Broad	Intermediate	Intermediate	Intermediate	Intermediate	Sharp	Intermediate	Intermediate	Broad	Sharp	Sharp	Intermediate	Intermediate
chr5	176056057	176057557	-	NM_001001502	SNCB	coding gene	Non	Non	Sharp	Sharp	Non	Non	Sharp	Non	Sharp	Sharp	Sharp	Sharp	Non	Non	Non	Non	Non	Non	Non	Non
chr21	44313377	44314877	+	NM_001001503	NDUFV3	coding gene	Sharp	Sharp	Sharp	Sharp	Sharp	Sharp	Sharp	Sharp	Sharp	Sharp	Sharp	Sharp	Sharp	Sharp	Sharp	Sharp	Sharp	Sharp	Sharp	Sharp
chr19	4472254	4473754	+	NM_001001520	HDGFL2	coding gene	Broad	Broad	Broad	Intermediate	Intermediate	Broad	Broad	Broad	Intermediate	Broad	Broad	Broad	Sharp	Intermediate	Broad	Intermadiate	Intermediate	Broad	Intermediate	Intermediate
chr2	64068097	64069597	+	NM_001001521	UGP2	coding gene	Broad	Intermediate	Broad	Intermediate	Intermediate	Broad	Broad	Broad	Intermediate	Broad	Broad	Broad	Intermediate	Broad	Intermediate	Broad	Broad	Intermediate	Broad	Broad
chr11	117070039	117071539	+	NM_001001522	TAGLN	coding gene	Non	Non	Non	Non	Non	Non	Non	Non	Non	Non	Non	Non	Non	Non	Non	Non	Non	Non	Non	Non
chr1	151797053	151798553	-	NM_001001523	RORC	coding gene	Broad	Broad	Intermediate	Broad	Non	Broad	Sharp	Non	Broad	Broad	Intermediate	Sharp	Non	Broad	Sharp	Non	Sharp	Sharp	Broad	Non
chr19	19382574	19384074	-	NM_001001524	TM6SF2	coding gene	Non	Non	Non	Non	Non	Non	Non	Non	Non	Non	Non	Non	Non	Non	Non	Non	Non	Non	Non	Non
chr7	80231503	80233003	+	NM_001001547	CD36	coding gene	Non	Non	Non	Non	Non	Non	Non	Non	Non	Non	Non	Non	Non	Non	Non	Non	Non	Non	Non	Non
chr7	80267831	80269331	+	NM_001001548	CD36	coding gene	Non	Non	Non	Non	Non	Non	Non	Non	Non	Non	Non	Non	Non	Non	Non	Non	Non	Non	Non	Non
chr7	50798550	50800050	-	NM_001001549	GRB10	coding gene	Non	Non	Non	Non	Non	Non	Non	Non	Non	Non	Non	Non	Non	Non	Non	Non	Non	Non	Non	Non
chr7	50771498	50772998	-	NM_001001550	GRB10	coding gene	Non	Non	Non	Non	Non	Non	Non	Non	Non	Non	Non	Non	Non	Non	Non	Non	Non	Non	Non	Non
chr9	86238032	86239532	+	NM_001001551	IDNK	coding gene	Intermediate	Intermediate	Sharp	Sharp	Sharp	Sharp	Sharp	Sharp	Sharp	Sharp	Sharp	Sharp	Sharp	Sharp	Sharp	Sharp	Sharp	Sharp	Sharp	Sharp
chr1	205389714	205391214	-	NM_001001552	LEMD1	coding gene	Non	Non	Non	Non	Non	Non	Non	Non	Non	Non	Non	Non	Non	Non	Non	Non	Non	Non	Non	Non
chr7	50859659	50861159	-	NM_001001555	GRB10	coding gene	Sharp	Sharp	Sharp	Sharp	Non	Sharp	Sharp	Sharp	Sharp	Sharp	Sharp	Intermediate	Sharp	Non	Sharp	Non	Non	Sharp	Intermediate	Non
chr15	49447975	49449475	+	NM_001001556	GALK2	coding gene	Sharp	Sharp	Sharp	Sharp	Sharp	Broad	Intermediate	Broad	Sharp	Intermediate	Intermediate	Sharp	Sharp	Intermediate	Intermediate	Intermadiate	Sharp	Intermediate	Intermediate	Intermediate
chr8	97171520	97173020	-	NM_001001557	GDF6	coding gene	Non	Non	Non	Non	Non	Non	Sharp	Non	Non	Sharp	Non	Non	Non	Non	Non	Non	Non	Non	Non	Non
chr22	38004480	38005980	+	NM_001001560	GGA1	coding gene	Sharp	Sharp	Intermediate	Intermediate	Sharp	Sharp	Sharp	Intermediate	Sharp	Intermediate	Sharp	Sharp	Sharp	Sharp	Intermediate	Intermadiate	Sharp	Sharp	Broad	Intermediate
chr22	38004480	38005980	+	NM_001001561	None	coding gene	Sharp	Sharp	Intermediate	Intermediate	Sharp	Sharp	Sharp	Intermediate	Sharp	Intermediate	Sharp	Sharp	Sharp	Sharp	Intermediate	Intermadiate	Sharp	Sharp	Broad	Intermediate
chr19	39971051	39972551	+	NM_001001563	TIMM50	coding gene	Sharp	Sharp	Sharp	Sharp	Sharp	Sharp	Sharp	Sharp	Sharp	Sharp	Sharp	Sharp	Sharp	Sharp	Sharp	Sharp	Sharp	Sharp	Intermediate	Sharp
chr21	44073861	44075361	+	NM_001001567	PDE9A	coding gene	Sharp	Sharp	Sharp	Sharp	Sharp	Sharp	Sharp	Sharp	Sharp	Sharp	Sharp	Sharp	Sharp	Sharp	Sharp	Sharp	Sharp	Sharp	Sharp	Sharp
chr21	44073861	44075361	+	NM_001001568	PDE9A	coding gene	Sharp	Sharp	Sharp	Sharp	Sharp	Sharp	Sharp	Sharp	Sharp	Sharp	Sharp	Sharp	Sharp	Sharp	Sharp	Sharp	Sharp	Sharp	Sharp	Sharp
chr21	44073861	44075361	+	NM_001001569	PDE9A	coding gene	Sharp	Sharp	Sharp	Sharp	Sharp	Sharp	Sharp	Sharp	Sharp	Sharp	Sharp	Sharp	Sharp	Sharp	Sharp	Sharp	Sharp	Sharp	Sharp	Sharp
chr21	44073861	44075361	+	NM_001001570	PDE9A	coding gene	Sharp	Sharp	Sharp	Sharp	Sharp	Sharp	Sharp	Sharp	Sharp	Sharp	Sharp	Sharp	Sharp	Sharp	Sharp	Sharp	Sharp	Sharp	Sharp	Sharp
chr21	44073861	44075361	+	NM_001001571	PDE9A	coding gene	Sharp	Sharp	Sharp	Sharp	Sharp	Sharp	Sharp	Sharp	Sharp	Sharp	Sharp	Sharp	Sharp	Sharp	Sharp	Sharp	Sharp	Sharp	Sharp	Sharp
chr21	44073861	44075361	+	NM_001001572	PDE9A	coding gene	Sharp	Sharp	Sharp	Sharp	Sharp	Sharp	Sharp	Sharp	Sharp	Sharp	Sharp	Sharp	Sharp	Sharp	Sharp	Sharp	Sharp	Sharp	Sharp	Sharp
chr21	44073861	44075361	+	NM_001001573	PDE9A	coding gene	Sharp	Sharp	Sharp	Sharp	Sharp	Sharp	Sharp	Sharp	Sharp	Sharp	Sharp	Sharp	Sharp	Sharp	Sharp	Sharp	Sharp	Sharp	Sharp	Sharp
chr21	44073861	44075361	+	NM_001001574	PDE9A	coding gene	Sharp	Sharp	Sharp	Sharp	Sharp	Sharp	Sharp	Sharp	Sharp	Sharp	Sharp	Sharp	Sharp	Sharp	Sharp	Sharp	Sharp	Sharp	Sharp	Sharp
chr21	44073861	44075361	+	NM_001001575	PDE9A	coding gene	Sharp	Sharp	Sharp	Sharp	Sharp	Sharp	Sharp	Sharp	Sharp	Sharp	Sharp	Sharp	Sharp	Sharp	Sharp	Sharp	Sharp	Sharp	Sharp	Sharp
chr21	44073861	44075361	+	NM_001001576	PDE9A	coding gene	Sharp	Sharp	Sharp	Sharp	Sharp	Sharp	Sharp	Sharp	Sharp	Sharp	Sharp	Sharp	Sharp	Sharp	Sharp	Sharp	Sharp	Sharp	Sharp	Sharp
chr21	44073861	44075361	+	NM_001001577	PDE9A	coding gene	Sharp	Sharp	Sharp	Sharp	Sharp	Sharp	Sharp	Sharp	Sharp	Sharp	Sharp	Sharp	Sharp	Sharp	Sharp	Sharp	Sharp	Sharp	Sharp	Sharp
chr21	44073861	44075361	+	NM_001001578	PDE9A	coding gene	Sharp	Sharp	Sharp	Sharp	Sharp	Sharp	Sharp	Sharp	Sharp	Sharp	Sharp	Sharp	Sharp	Sharp	Sharp	Sharp	Sharp	Sharp	Sharp	Sharp
chr21	44073861	44075361	+	NM_001001579	PDE9A	coding gene	Sharp	Sharp	Sharp	Sharp	Sharp	Sharp	Sharp	Sharp	Sharp	Sharp	Sharp	Sharp	Sharp	Sharp	Sharp	Sharp	Sharp	Sharp	Sharp	Sharp
chr21	44073861	44075361	+	NM_001001580	PDE9A	coding gene	Sharp	Sharp	Sharp	Sharp	Sharp	Sharp	Sharp	Sharp	Sharp	Sharp	Sharp	Sharp	Sharp	Sharp	Sharp	Sharp	Sharp	Sharp	Sharp	Sharp
chr21	44073861	44075361	+	NM_001001581	PDE9A	coding gene	Sharp	Sharp	Sharp	Sharp	Sharp	Sharp	Sharp	Sharp	Sharp	Sharp	Sharp	Sharp	Sharp	Sharp	Sharp	Sharp	Sharp	Sharp	Sharp	Sharp
chr21	44073861	44075361	+	NM_001001582	PDE9A	coding gene	Sharp	Sharp	Sharp	Sharp	Sharp	Sharp	Sharp	Sharp	Sharp	Sharp	Sharp	Sharp	Sharp	Sharp	Sharp	Sharp	Sharp	Sharp	Sharp	Sharp
chr21	44073861	44075361	+	NM_001001583	PDE9A	coding gene	Sharp	Sharp	Sharp	Sharp	Sharp	Sharp	Sharp	Sharp	Sharp	Sharp	Sharp	Sharp	Sharp	Sharp	Sharp	Sharp	Sharp	Sharp	Sharp	Sharp
chr21	44073861	44075361	+	NM_001001584	PDE9A	coding gene	Sharp	Sharp	Sharp	Sharp	Sharp	Sharp	Sharp	Sharp	Sharp	Sharp	Sharp	Sharp	Sharp	Sharp	Sharp	Sharp	Sharp	Sharp	Sharp	Sharp
chr21	44073861	44075361	+	NM_001001585	PDE9A	coding gene	Sharp	Sharp	Sharp	Sharp	Sharp	Sharp	Sharp	Sharp	Sharp	Sharp	Sharp	Sharp	Sharp	Sharp	Sharp	Sharp	Sharp	Sharp	Sharp	Sharp
chr12	109529793	109531293	-	NM_001001655	ALKBH2	coding gene	Sharp	Sharp	Sharp	Sharp	Sharp	Sharp	Sharp	Sharp	Sharp	Sharp	Sharp	Sharp	Non	Sharp	Sharp	Intermadiate	Sharp	Sharp	Intermediate	Sharp
chr7	141618675	141620175	+	NM_001001656	OR9A4	coding gene	Non	Non	Non	Non	Non	Non	Non	Non	Non	Non	Non	Non	Non	Non	Non	Non	Non	Non	Non	Non
chr5	180165558	180167058	-	NM_001001657	OR2Y1	coding gene	Non	Non	Non	Non	Non	Non	Non	Non	Non	Non	Non	Non	Non	Non	Non	Non	Non	Non	Non	Non
chr7	142722719	142724219	-	NM_001001658	OR9A2	coding gene	Non	Non	Non	Non	Non	Non	Non	Non	Non	Non	Non	Non	Non	Non	Non	Non	Non	Non	Non	Non
chr7	143826205	143827705	+	NM_001001659	OR2A14	coding gene	Non	Non	Non	Non	Non	Non	Non	Non	Non	Non	Non	Non	Non	Non	Non	Non	Non	Non	Non	Non
chr12	25348149	25349649	+	NM_001001660	ETFRF1	coding gene	Sharp	Sharp	Sharp	Sharp	Sharp	Sharp	Sharp	Intermediate	Sharp	Sharp	Sharp	Sharp	Sharp	Sharp	Sharp	Sharp	Sharp	Sharp	Sharp	Sharp
chr7	148821938	148823438	-	NM_001001661	ZNF425	coding gene	Intermediate	Sharp	Intermediate	Sharp	Sharp	Intermediate	Intermediate	Intermediate	Intermediate	Sharp	Intermediate	Intermediate	Sharp	Intermediate	Intermediate	Intermadiate	Intermediate	Intermediate	Intermediate	Intermediate
chr9	99614889	99616389	-	NM_001001662	ZNF782	coding gene	Sharp	Sharp	Sharp	Sharp	Sharp	Sharp	Sharp	Sharp	Sharp	Sharp	Sharp	Sharp	Sharp	Intermediate	Sharp	Sharp	Sharp	Sharp	Intermediate	Sharp
chr22	25333814	25335314	-	NM_001001663	TMEM211	coding gene	Non	Non	Non	Non	Non	Non	Non	Non	Non	Non	Non	Non	Non	Non	Non	Non	Non	Non	Non	Non
chr2	139259349	139260849	+	NM_001001664	SPOPL	coding gene	Sharp	Sharp	Sharp	Sharp	Sharp	Sharp	Intermediate	Broad	Intermediate	Intermediate	Sharp	Sharp	Sharp	Non	Sharp	Non	Sharp	Non	Intermediate	Non
chr2	127961843	127963343	-	NM_001001665	CYP27C1	coding gene	Non	Non	Non	Non	Non	Non	Non	Non	Non	Non	Non	Non	Non	Non	Non	Non	Non	Non	Non	Non
chr2	242127923	242129423	+	NM_001001666	ANO7	coding gene	Non	Non	Non	Non	Non	Non	Non	Non	Non	Non	Non	Non	Non	Non	Non	Non	Non	Non	Non	Non
chr7	142749437	142750937	+	NM_001001667	OR6V1	coding gene	Non	Non	Non	Non	Non	Non	Non	Non	Non	Non	Non	Non	Non	Non	Non	Non	Non	Non	Non	Non
chr19	57078889	57080389	+	NM_001001668	ZNF470	coding gene	Sharp	Sharp	Sharp	Sharp	Sharp	Sharp	Sharp	Sharp	Sharp	Sharp	Sharp	Sharp	Sharp	Sharp	Non	Sharp	Sharp	Sharp	Sharp	Sharp
chr5	148961134	148962634	+	NM_001001669	ARHGEF37	coding gene	Sharp	Sharp	Sharp	Sharp	Non	Non	Sharp	Sharp	Sharp	Sharp	Sharp	Sharp	Sharp	Non	Non	Non	Non	Sharp	Non	Non
chr9	84603686	84605186	+	NM_001001670	SPATA31D1	coding gene	Non	Non	Non	Non	Non	Non	Non	Non	Non	Non	Non	Non	Non	Non	Non	Non	Non	Non	Non	Non
chrX	19531879	19533379	-	NM_001001671	MAP3K15	coding gene	Sharp	Sharp	Sharp	Sharp	Non	Non	Sharp	Non	Sharp	Sharp	Sharp	Sharp	Non	Non	Sharp	Non	Non	Sharp	Non	Non
chr14	21027590	21029090	-	NM_001001673	RNASE9	coding gene	Non	Non	Non	Non	Non	Non	Non	Non	Non	Non	Non	Non	Non	Non	Non	Non	Non	Non	Non	Non
chr15	102358389	102359889	+	NM_001001674	OR4F15	coding gene	Non	Non	Non	Non	Non	Non	Non	Non	Non	Non	Non	Non	Non	Non	Non	Non	Non	Non	Non	Non
chr9	138555167	138556667	+	NM_001001676	LCN9	coding gene	Non	Non	Non	Non	Non	Non	Non	Non	Non	Non	Non	Non	Non	Non	Non	Non	Non	Non	Non	Non
chr17	4634722	4636222	+	NM_001001683	MED11	coding gene	Sharp	Sharp	Sharp	Sharp	Sharp	Sharp	Sharp	Sharp	Sharp	Sharp	Sharp	Sharp	Sharp	Sharp	Sharp	Sharp	Sharp	Sharp	Intermediate	Sharp
chr22	50449555	50451055	-	NM_001001694	IL17REL	coding gene	Non	Non	Sharp	Sharp	Non	Non	Non	Non	Non	Non	Non	Sharp	Non	Non	Sharp	Non	Non	Sharp	Sharp	Non
chr4	120220468	120221968	-	NM_001001701	C4orf3	coding gene	Sharp	Sharp	Sharp	Sharp	Sharp	Intermediate	Sharp	Intermediate	Sharp	Sharp	Sharp	Sharp	Sharp	Intermediate	Sharp	Broad	Sharp	Sharp	Intermediate	Sharp
chr9	89763558	89765058	+	NM_001001709	None	coding gene	Non	Non	Non	Non	Non	Non	Non	Non	Non	Non	Non	Non	Non	Non	Non	Non	Non	Non	Non	Non
chr9	140140722	140142222	-	NM_001001710	FAM166A	coding gene	Non	Non	Non	Non	Non	Non	Non	Non	Non	Non	Non	Non	Non	Non	Non	Non	Non	Non	Non	Non
chr11	103907307	103908807	+	NM_001001711	DDI1	coding gene	Non	Non	Non	Non	Non	Non	Non	Non	Non	Non	Non	Non	Non	Non	Non	Non	Non	Non	Non	Non
chr9	139635911	139637411	-	NM_001001712	LCN10	coding gene	Non	Sharp	Sharp	Sharp	Sharp	Sharp	Sharp	Non	Non	Sharp	Non	Sharp	Non	Non	Non	Non	Sharp	Sharp	Sharp	Non
chr21	40817796	40819296	+	NM_001001713	SH3BGR	coding gene	Sharp	Sharp	Sharp	Sharp	Sharp	Sharp	Sharp	Sharp	Sharp	Sharp	Sharp	Sharp	Sharp	Sharp	Sharp	Sharp	Sharp	Sharp	Sharp	Sharp
chr13	98795433	98796933	+	NM_001001715	FARP1	coding gene	Sharp	Sharp	Sharp	Sharp	Sharp	Sharp	Sharp	Non	Sharp	Sharp	Sharp	Sharp	Sharp	Non	Non	Non	Non	Sharp	Sharp	Non
chrY	19990599	19992099	-	NM_001001722	CDY2B	coding gene	Non	Non	Non	Non	Non	Non	Non	Non	Non	Non	Non	Non	Non	Non	Non	Non	Non	Non	Non	Non
chrY	20137667	20139167	+	NM_001001722_1	None	coding gene	Non	Non	Non	Non	Non	Non	Non	Non	Non	Non	Non	Non	Non	Non	Non	Non	Non	Non	Non	Non
chr10	97759847	97761347	+	NM_001001732	CC2D2B	coding gene	Non	Non	Non	Non	Non	Non	Non	Non	Non	Non	Non	Non	Non	Non	Non	Non	Non	Non	Non	Non
chr1	160147200	160148700	+	NM_001001734	ATP1A4	coding gene	Non	Non	Non	Non	Non	Non	Non	Non	Non	Non	Non	Non	Non	Non	Non	Non	Non	Non	Non	Non
chr1	176174870	176176370	-	NM_001001740	COP1	coding gene	Intermediate	Intermediate	Intermediate	Intermediate	Sharp	Broad	Intermediate	Broad	Intermediate	Intermediate	Intermediate	Intermediate	Sharp	Broad	Intermediate	Broad	Intermediate	Intermediate	Intermediate	Intermediate
chr11	121985423	121986923	-	NM_001001786	BLID	coding gene	Non	Non	Non	Non	Non	Non	Non	Non	Non	Non	Non	Non	Non	Non	Non	Non	Non	Non	Non	Non
chr6	150242714	150244214	-	NM_001001788	RAET1G	coding gene	Non	Non	Sharp	Sharp	Non	Non	Sharp	Non	Non	Sharp	Sharp	Sharp	Non	Non	Sharp	Sharp	Sharp	Non	Sharp	Non
chr9	37591136	37592636	-	NM_001001790	TOMM5	coding gene	Sharp	Sharp	Sharp	Sharp	Sharp	Intermediate	Sharp	Sharp	Sharp	Sharp	Sharp	Sharp	Sharp	Intermediate	Sharp	Broad	Sharp	Sharp	Broad	Sharp
chr10	75681035	75682535	-	NM_001001791	None	coding gene	Non	Non	Non	Non	Non	Non	Non	Non	Non	Sharp	Non	Non	Non	Non	Non	Non	Non	Non	Sharp	Non
chr22	50763989	50765489	-	NM_001001794	DENND6B	coding gene	Sharp	Sharp	Sharp	Sharp	Sharp	Sharp	Sharp	Sharp	Sharp	Sharp	Sharp	Sharp	Sharp	Sharp	Non	Sharp	Non	Sharp	Sharp	Sharp
chr8	145752958	145754458	-	NM_001001795	C8orf82	coding gene	Sharp	Sharp	Sharp	Intermediate	Sharp	Sharp	Intermediate	Sharp	Sharp	Intermediate	Sharp	Intermediate	Sharp	Sharp	Sharp	Sharp	Sharp	Sharp	Intermediate	Sharp
chr7	143928436	143929936	-	NM_001001802	OR2A42	coding gene	Non	Non	Non	Non	Non	Non	Non	Non	Non	Non	Non	Non	Non	Non	Non	Non	Non	Non	Non	Non
chr7	144015217	144016717	+	NM_001001802_1	None	coding gene	Non	Non	Non	Non	Non	Non	Non	Non	Non	Non	Non	Non	Non	Non	Non	Non	Non	Non	Non	Non
chr1	248736558	248738058	-	NM_001001821	OR2T34	coding gene	Non	Non	Non	Non	Non	Non	Non	Non	Non	Non	Non	Non	Non	Non	Non	Non	Non	Non	Non	Non
chr1	248812685	248814185	-	NM_001001824	OR2T27	coding gene	Non	Non	Non	Non	Non	Non	Non	Non	Non	Non	Non	Non	Non	Non	Non	Non	Non	Non	Non	Non
chr1	248801059	248802559	-	NM_001001827	OR2T35	coding gene	Non	Non	Non	Non	Non	Non	Non	Non	Non	Non	Non	Non	Non	Non	Non	Non	Non	Non	Non	Non
chr3	93745954	93747454	-	NM_001001850	STX19	coding gene	Non	Non	Non	Non	Non	Non	Non	Non	Non	Non	Non	Non	Non	Non	Non	Non	Non	Non	Non	Non
chr10	7707461	7708961	-	NM_001001851	ITIH5	coding gene	Sharp	Sharp	Sharp	Sharp	Non	Non	Sharp	Non	Sharp	Sharp	Non	Sharp	Non	Non	Non	Non	Non	Non	Non	Non
chr22	50354142	50355642	+	NM_001001852	PIM3	coding gene	Intermediate	Intermediate	Broad	Intermediate	Sharp	Intermediate	Intermediate	Intermediate	Intermediate	Broad	Intermediate	Intermediate	Sharp	Intermediate	Intermediate	Intermadiate	Intermediate	Intermediate	Intermediate	Non
chr14	58617347	58618847	-	NM_001001872	ARMH4	coding gene	Sharp	Sharp	Sharp	Sharp	Non	Sharp	Sharp	Sharp	Sharp	Sharp	Sharp	Sharp	Sharp	Sharp	Sharp	Sharp	Sharp	Sharp	Sharp	Non
chr9	6328348	6329848	+	NM_001001874	TPD52L3	coding gene	Non	Non	Non	Non	Non	Non	Non	Non	Non	Non	Non	Non	Non	Non	Non	Non	Non	Non	Non	Non
chr9	6328348	6329848	+	NM_001001875	TPD52L3	coding gene	Non	Non	Non	Non	Non	Non	Non	Non	Non	Non	Non	Non	Non	Non	Non	Non	Non	Non	Non	Non
chrY	20708576	20710076	+	NM_001001877	HSFY2	coding gene	Non	Non	Non	Non	Non	Non	Non	Non	Non	Non	Non	Non	Non	Non	Non	Non	Non	Non	Non	Non
chrY	20934101	20935601	-	NM_001001877_1	HSFY1	coding gene	Non	Non	Non	Non	Non	Non	Non	Non	Non	Non	Non	Non	Non	Non	Non	Non	Non	Non	Non	Non
chrX	8432870	8434370	+	NM_001001888	None	coding gene	Non	Non	Non	Non	Non	Non	Non	Non	Non	Non	Non	Non	Non	Non	Non	Non	Non	Non	Non	Non
chr21	36259487	36260987	-	NM_001001890	VCX3B	coding gene	Broad	Broad	Broad	Broad	Intermediate	Broad	Broad	Broad	Broad	Broad	Broad	Broad	Sharp	Broad	Broad	Broad	Broad	Broad	Broad	Broad
chr2	242127923	242129423	+	NM_001001891	RUNX1	coding gene	Non	Non	Non	Non	Non	Non	Non	Non	Non	Non	Non	Non	Non	Non	Non	Non	Non	Non	Non	Non
chr21	38445570	38447070	+	NM_001001894	None	coding gene	Intermediate	Intermediate	Intermediate	Intermediate	Intermediate	Intermediate	Intermediate	Broad	Intermediate	Intermediate	Intermediate	Intermediate	Sharp	Intermediate	Intermediate	Broad	Sharp	Intermediate	Intermediate	Intermediate
chr21	43823970	43825470	+	NM_001001895	TTC3	coding gene	Intermediate	Broad	Broad	Broad	Non	Broad	Intermediate	Sharp	Broad	Intermediate	Broad	Intermediate	Non	Broad	Intermediate	Broad	Intermediate	Broad	Intermediate	Intermediate
chr14	22133296	22134796	+	NM_001001912	UBASH3A	coding gene	Non	Non	Non	Non	Non	Non	Non	Non	Non	Non	Non	Non	Non	Non	Non	Non	Non	Non	Non	Non
chr11	5808546	5810046	-	NM_001001913	OR4E2	coding gene	Non	Non	Non	Non	Non	Non	Non	Non	Non	Non	Non	Non	Non	Non	Non	Non	Non	Non	Non	Non
chr1	247768887	247770387	+	NM_001001914	OR52N1	coding gene	Non	Non	Non	Non	Non	Non	Non	Non	Non	Non	Non	Non	Non	Non	Non	Non	Non	Non	Non	Non
chr1	247751661	247753161	+	NM_001001915	OR2G3	coding gene	Non	Non	Non	Non	Non	Non	Non	Non	Non	Non	Non	Non	Non	Non	Non	Non	Non	Non	Non	Non
chr11	5067755	5069255	+	NM_001001916	OR2G2	coding gene	Non	Non	Non	Non	Non	Non	Non	Non	Non	Non	Non	Non	Non	Non	Non	Non	Non	Non	Non	Non
chr11	6047471	6048971	-	NM_001001917	OR52J3	coding gene	Non	Non	Non	Non	Non	Non	Non	Non	Non	Non	Non	Non	Non	Non	Non	Non	Non	Non	Non	Non
chr1	248512076	248513576	+	NM_001001918	OR56A1	coding gene	Non	Non	Non	Non	Non	Non	Non	Non	Non	Non	Non	Non	Non	Non	Non	Non	Non	Non	Non	Non
chr9	107287990	107289490	-	NM_001001919	OR14C36	coding gene	Non	Non	Non	Non	Non	Non	Non	Non	Non	Non	Non	Non	Non	Non	Non	Non	Non	Non	Non	Non
chr11	55321782	55323282	+	NM_001001920	OR13C4	coding gene	Non	Non	Non	Non	Non	Non	Non	Non	Non	Non	Non	Non	Non	Non	Non	Non	Non	Non	Non	Non
chr11	55797894	55799394	+	NM_001001921	OR4C15	coding gene	Non	Non	Non	Non	Non	Non	Non	Non	Non	Non	Non	Non	Non	Non	Non	Non	Non	Non	Non	Non
chr11	5798397	5799897	-	NM_001001922	OR5AS1	coding gene	Non	Non	Non	Non	Non	Non	Non	Non	Non	Non	Non	Non	Non	Non	Non	Non	Non	Non	Non	Non
chr9	125551211	125552711	+	NM_001001923	OR52N5	coding gene	Non	Non	Non	Non	Non	Non	Non	Non	Non	Non	Non	Non	Non	Non	Non	Non	Non	Non	Non	Non
chr8	17656926	17658426	-	NM_001001924	OR5C1	coding gene	Non	Sharp	Sharp	Sharp	Non	Non	Sharp	Non	Sharp	Sharp	Sharp	Sharp	Sharp	Non	Sharp	Sharp	Non	Sharp	Sharp	Non
chr8	17656926	17658426	-	NM_001001925	MTUS1	coding gene	Non	Sharp	Sharp	Sharp	Non	Non	Sharp	Non	Sharp	Sharp	Sharp	Sharp	Sharp	Non	Sharp	Sharp	Non	Sharp	Sharp	Non
chr22	46546498	46547998	+	NM_001001928	MTUS1	coding gene	Intermediate	Intermediate	Intermediate	Sharp	Sharp	Intermediate	Broad	Intermediate	Broad	Intermediate	Broad	Broad	Intermediate	Intermediate	Intermediate	Intermadiate	Sharp	Intermediate	Intermediate	Sharp
chr8	17578230	17579730	-	NM_001001931	PPARA	coding gene	Non	Non	Non	Non	Non	Non	Non	Non	Non	Non	Non	Non	Non	Non	Non	Non	Non	Non	Non	Non
chr1	75594118	75595618	+	NM_001001933	MTUS1	coding gene	Non	Non	Non	Non	Non	Non	Non	Non	Non	Non	Non	Non	Non	Non	Non	Non	Non	Non	Non	Non
chr10	116163015	116164515	-	NM_001001936	LHX8	coding gene	Non	Non	Sharp	Sharp	Non	Non	Non	Sharp	Non	Sharp	Sharp	Sharp	Non	Non	Non	Non	Non	Non	Sharp	Non
chr18	43682699	43684199	-	NM_001001937	AFAP1L2	coding gene	Sharp	Sharp	Sharp	Sharp	Sharp	Sharp	Sharp	Sharp	Sharp	Sharp	Sharp	Sharp	Non	Sharp	Sharp	Broad	Sharp	Sharp	Intermediate	Sharp
chr9	91605777	91607277	+	NM_001001938	S1PR3	coding gene	Intermediate	Sharp	Sharp	Sharp	Non	Non	Broad	Sharp	Broad	Broad	Broad	Broad	Non	Non	Broad	Non	Intermediate	Sharp	Intermediate	Non
chr11	55587105	55588605	+	NM_001001952	ATP5F1A	coding gene	Non	Non	Non	Non	Non	Non	Non	Non	Non	Non	Non	Non	Non	Non	Non	Non	Non	Non	Non	Non
chr11	123893719	123895219	+	NM_001001953	OR5D18	coding gene	Non	Non	Non	Non	Non	Non	Non	Non	Non	Non	Non	Non	Non	Non	Non	Non	Non	Non	Non	Non
chr11	59188926	59190426	-	NM_001001954	OR10G9	coding gene	Non	Non	Non	Non	Non	Non	Non	Non	Non	Non	Non	Non	Non	Non	Non	Non	Non	Non	Non	Non
chr11	49973942	49975442	+	NM_001001955	OR5A2	coding gene	Non	Non	Non	Non	Non	Non	Non	Non	Non	Non	Non	Non	Non	Non	Non	Non	Non	Non	Non	Non
chr9	107378985	107380485	-	NM_001001956	OR4C13	coding gene	Non	Non	Non	Non	Non	Non	Non	Non	Non	Non	Non	Non	Non	Non	Non	Non	Non	Non	Non	Non
chr1	248058888	248060388	+	NM_001001957	OR13C9	coding gene	Non	Non	Non	Non	Non	Non	Non	Non	Non	Non	Non	Non	Non	Non	Non	Non	Non	Non	Non	Non
chr19	9236126	9237626	-	NM_001001958	OR2W3	coding gene	Non	Non	Non	Non	Non	Non	Non	Non	Non	Non	Non	Non	Non	Non	Non	Non	Non	Non	Non	Non
chr1	248003698	248005198	-	NM_001001959	OR7G3	coding gene	Non	Non	Non	Non	Non	Non	Non	Non	Non	Non	Non	Non	Non	Non	Non	Non	Non	Non	Non	Non
chr11	55680558	55682058	-	NM_001001960	OR11L1	coding gene	Non	Non	Non	Non	Non	Non	Non	Non	Non	Non	Non	Non	Non	Non	Non	Non	Non	Non	Non	Non
chr9	107297594	107299094	-	NM_001001961	OR5W2	coding gene	Non	Non	Non	Non	Non	Non	Non	Non	Non	Non	Non	Non	Non	Non	Non	Non	Non	Non	Non	Non
chr1	248112159	248113659	+	NM_001001963	OR13C3	coding gene	Non	Non	Non	Non	Non	Non	Non	Non	Non	Non	Non	Non	Non	Non	Non	Non	Non	Non	Non	Non
chr1	248788929	248790429	-	NM_001001964	OR2L8	coding gene	Non	Non	Non	Non	Non	Non	Non	Non	Non	Non	Non	Non	Non	Non	Non	Non	Non	Non	Non	Non
chr11	123810323	123811823	+	NM_001001965	OR2T11	coding gene	Non	Non	Non	Non	Non	Non	Non	Non	Non	Non	Non	Non	Non	Non	Non	Non	Non	Non	Non	Non
chr1	247977531	247979031	-	NM_001001966	OR4D5	coding gene	Non	Non	Non	Non	Non	Non	Non	Non	Non	Non	Non	Non	Non	Non	Non	Non	Non	Non	Non	Non
chr11	55540913	55542413	+	NM_001001967	OR14A16	coding gene	Non	Non	Non	Non	Non	Non	Non	Non	Non	Non	Non	Non	Non	Non	Non	Non	Non	Non	Non	Non
chr14	21108350	21109850	-	NM_001001968	OR5D13	coding gene	Non	Non	Non	Non	Non	Non	Non	Non	Non	Non	Non	Non	Non	Non	Non	Non	Non	Non	Non	Non
chr10	61120852	61122352	-	NM_001001971	OR6S1	coding gene	Non	Non	Non	Non	Non	Non	Non	Non	Non	Non	Non	Non	Non	Non	Non	Non	Non	Sharp	Non	Non
chr10	7830092	7831592	+	NM_001001973	FAM13C	coding gene	Sharp	Sharp	Sharp	Sharp	Sharp	Intermediate	Sharp	Intermediate	Intermediate	Intermediate	Intermediate	Intermediate	Sharp	Intermediate	Intermediate	Broad	Sharp	Intermediate	Intermediate	Sharp
chr10	124134093	124135593	+	NM_001001974	ATP5F1C	coding gene	Sharp	Sharp	Sharp	Sharp	Non	Sharp	Sharp	Sharp	Sharp	Sharp	Sharp	Sharp	Sharp	Broad	Broad	Non	Sharp	Sharp	Non	Intermediate
chr19	1241748	1243248	+	NM_001001975	PLEKHA1	coding gene	Sharp	Intermediate	Sharp	Sharp	Sharp	Sharp	Intermediate	Intermediate	Sharp	Sharp	Sharp	Intermediate	Sharp	Broad	Intermediate	Intermadiate	Intermediate	Sharp	Broad	Intermediate
chr10	123686046	123687546	-	NM_001001976	ATP5F1D	coding gene	Intermediate	Sharp	Sharp	Sharp	Sharp	Intermediate	Intermediate	Intermediate	Sharp	Intermediate	Sharp	Sharp	Sharp	Sharp	Sharp	Broad	Sharp	Intermediate	Intermediate	Sharp
chr11	35545676	35547176	-	NM_001001991	ATE1	coding gene	Non	Non	Non	Non	Non	Non	Non	Non	Non	Non	Non	Non	Non	Non	Non	Non	Non	Non	Non	Non
chr21	30396937	30398437	+	NM_001001992	PAMR1	coding gene	Sharp	Sharp	Sharp	Sharp	Sharp	Intermediate	Sharp	Sharp	Sharp	Sharp	Sharp	Intermediate	Sharp	Intermediate	Sharp	Sharp	Sharp	Sharp	Sharp	Sharp
chrX	13955331	13956831	-	NM_001001994	USP16	coding gene	Sharp	Sharp	Sharp	Sharp	Non	Non	Sharp	Non	Sharp	Sharp	Sharp	Sharp	Non	Non	Non	Non	Non	Non	Sharp	Non
chrX	13833814	13835314	-	NM_001001995	GPM6B	coding gene	Non	Non	Non	Non	Non	Non	Non	Non	Non	Non	Non	Non	Non	Non	Non	Non	Non	Non	Non	Non
chrX	13833814	13835314	-	NM_001001996	GPM6B	coding gene	Non	Non	Non	Non	Non	Non	Non	Non	Non	Non	Non	Non	Non	Non	Non	Non	Non	Non	Non	Non
chr1	11158438	11159938	-	NM_001001998	GPM6B	coding gene	Sharp	Sharp	Sharp	Sharp	Sharp	Sharp	Sharp	Sharp	Sharp	Sharp	Sharp	Sharp	Sharp	Sharp	Sharp	Sharp	Sharp	Sharp	Sharp	Sharp
chr12	120637514	120639014	-	NM_001002	EXOSC10	coding gene	Sharp	Sharp	Intermediate	Intermediate	Sharp	Broad	Intermediate	Intermediate	Intermediate	Intermediate	Intermediate	Intermediate	Sharp	Broad	Intermediate	Broad	Intermediate	Broad	Broad	Broad
chr14	24701647	24703147	+	NM_001002000	RPLP0	coding gene	Sharp	Sharp	Intermediate	Sharp	Sharp	Sharp	Sharp	Intermediate	Sharp	Sharp	Sharp	Intermediate	Sharp	Intermediate	Intermediate	Broad	Sharp	Sharp	Intermediate	Intermediate
chr14	24701647	24703147	+	NM_001002001	GMPR2	coding gene	Sharp	Sharp	Intermediate	Sharp	Sharp	Sharp	Sharp	Intermediate	Sharp	Sharp	Sharp	Intermediate	Sharp	Intermediate	Intermediate	Broad	Sharp	Sharp	Intermediate	Intermediate
chr14	24702102	24703602	+	NM_001002002	GMPR2	coding gene	Sharp	Sharp	Intermediate	Sharp	Sharp	Sharp	Sharp	Intermediate	Sharp	Sharp	Sharp	Intermediate	Sharp	Intermediate	Intermediate	Broad	Sharp	Sharp	Intermediate	Intermediate
chr2	18769346	18770846	-	NM_001002006	GMPR2	coding gene	Non	Non	Non	Non	Non	Non	Non	Non	Non	Non	Non	Non	Non	Non	Non	Non	Non	Non	Non	Non
chr7	33100909	33102409	-	NM_001002010	NT5C1B	coding gene	Intermediate	Sharp	Sharp	Sharp	Sharp	Intermediate	Intermediate	Intermediate	Sharp	Intermediate	Sharp	Intermediate	Sharp	Broad	Intermediate	Broad	Sharp	Sharp	Intermediate	Intermediate
chr16	3072787	3074287	-	NM_001002017	NT5C3A	coding gene	Sharp	Sharp	Sharp	Sharp	Sharp	Sharp	Sharp	Broad	Sharp	Sharp	Sharp	Sharp	Sharp	Sharp	Sharp	Intermadiate	Sharp	Sharp	Broad	Broad
chr16	3072787	3074287	-	NM_001002018	HCFC1R1	coding gene	Sharp	Sharp	Sharp	Sharp	Sharp	Sharp	Sharp	Broad	Sharp	Sharp	Sharp	Sharp	Sharp	Sharp	Sharp	Intermadiate	Sharp	Sharp	Broad	Broad
chr12	132413797	132415297	+	NM_001002019	HCFC1R1	coding gene	Sharp	Sharp	Sharp	Sharp	Sharp	Sharp	Sharp	Sharp	Sharp	Sharp	Sharp	Sharp	Sharp	Sharp	Intermediate	Sharp	Sharp	Sharp	Intermediate	Sharp
chr12	132413744	132415244	+	NM_001002020	PUS1	coding gene	Sharp	Sharp	Sharp	Sharp	Sharp	Sharp	Sharp	Sharp	Sharp	Sharp	Sharp	Sharp	Sharp	Sharp	Intermediate	Sharp	Sharp	Sharp	Intermediate	Sharp
chr3	137717657	137719157	+	NM_001002026	PUS1	coding gene	Non	Non	Non	Non	Non	Non	Non	Non	Non	Non	Non	Non	Non	Non	Non	Non	Non	Non	Non	Non
chr17	46970147	46971647	+	NM_001002027	CLDN18	coding gene	Sharp	Sharp	Sharp	Sharp	Sharp	Intermediate	Sharp	Sharp	Sharp	Sharp	Sharp	Sharp	Sharp	Sharp	Intermediate	Sharp	Sharp	Sharp	Intermediate	Sharp
chr6	31982571	31984071	+	NM_001002029_7	ATP5MC1	coding gene	Non	Non	Non	Non	Non	Non	Non	Non	Non	Non	Non	Non	Non	Non	Non	Non	Non	Non	Non	Non
chr6	31949833	31951333	+	NM_001002029_8	None	coding gene	Non	Non	Non	Non	Non	Non	Non	Non	Non	Non	Non	Non	Non	Non	Non	Non	Non	Non	Non	Non
chr6	127663254	127664754	-	NM_001002030	None	coding gene	Intermediate	Intermediate	Intermediate	Sharp	Non	Intermediate	Intermediate	Sharp	Sharp	Intermediate	Sharp	Intermediate	Sharp	Broad	Intermediate	Broad	Intermediate	Sharp	Broad	Intermediate
chr12	54069012	54070512	-	NM_001002031	ECHDC1	coding gene	Intermediate	Sharp	Sharp	Sharp	Intermediate	Intermediate	Sharp	Intermediate	Sharp	Sharp	Sharp	Sharp	Sharp	Sharp	Sharp	Sharp	Sharp	Sharp	Intermediate	Sharp
chr17	73149274	73150774	-	NM_001002032	ATP5MC2	coding gene	Sharp	Sharp	Sharp	Sharp	Sharp	Intermediate	Broad	Intermediate	Intermediate	Broad	Intermediate	Intermediate	Sharp	Intermediate	Intermediate	Broad	Intermediate	Intermediate	Broad	Intermediate
chr17	73149274	73150774	-	NM_001002033	JPT1	coding gene	Sharp	Sharp	Sharp	Sharp	Sharp	Intermediate	Broad	Intermediate	Intermediate	Broad	Intermediate	Intermediate	Sharp	Intermediate	Intermediate	Broad	Intermediate	Intermediate	Broad	Intermediate
chr22	42470254	42471754	+	NM_001002034	JPT1	coding gene	Sharp	Sharp	Sharp	Sharp	Non	Non	Sharp	Sharp	Sharp	Sharp	Sharp	Sharp	Sharp	Non	Non	Non	Non	Sharp	Sharp	Non
chr11	71544245	71545745	+	NM_001002035	PHETA2	coding gene	Non	Non	Non	Non	Non	Non	Non	Non	Non	Non	Non	Non	Non	Non	Non	Non	Non	Non	Non	Non
chr2	96802675	96804175	-	NM_001002036	DEFB108B	coding gene	Non	Non	Non	Non	Non	Non	Non	Non	Non	Non	Non	Non	Non	Non	Non	Non	Non	Non	Non	Non
chr19	51376688	51378188	+	NM_001002231	ASTL	coding gene	Non	Non	Non	Non	Non	Non	Non	Non	Non	Non	Non	Non	Non	Non	Non	Non	Non	Non	Non	Non
chr14	94855529	94857029	-	NM_001002235	KLK2	coding gene	Non	Non	Non	Non	Non	Non	Sharp	Non	Sharp	Sharp	Non	Non	Non	Non	Non	Non	Non	Non	Non	Non
chr14	94855529	94857029	-	NM_001002236	SERPINA1	coding gene	Non	Non	Non	Non	Non	Non	Sharp	Non	Sharp	Sharp	Non	Non	Non	Non	Non	Non	Non	Non	Non	Non
chr2	64751438	64752938	+	NM_001002243	SERPINA1	coding gene	Intermediate	Intermediate	Intermediate	Intermediate	Sharp	Broad	Intermediate	Intermediate	Intermediate	Intermediate	Intermediate	Intermediate	Sharp	Intermediate	Intermediate	Broad	Sharp	Sharp	Intermediate	Intermediate
chr17	79849598	79851098	+	NM_001002244	AFTPH	coding gene	Intermediate	Intermediate	Intermediate	Sharp	Sharp	Intermediate	Sharp	Intermediate	Sharp	Sharp	Sharp	Sharp	Sharp	Intermediate	Intermediate	Broad	Sharp	Intermediate	Intermediate	Intermediate
chr17	79849598	79851098	+	NM_001002245	ANAPC11	coding gene	Intermediate	Intermediate	Intermediate	Sharp	Sharp	Intermediate	Sharp	Intermediate	Sharp	Sharp	Sharp	Sharp	Sharp	Intermediate	Intermediate	Broad	Sharp	Intermediate	Intermediate	Intermediate
chr17	79849598	79851098	+	NM_001002246	ANAPC11	coding gene	Intermediate	Intermediate	Intermediate	Sharp	Sharp	Intermediate	Sharp	Intermediate	Sharp	Sharp	Sharp	Sharp	Sharp	Intermediate	Intermediate	Broad	Sharp	Intermediate	Intermediate	Intermediate
chr17	79849598	79851098	+	NM_001002247	ANAPC11	coding gene	Intermediate	Intermediate	Intermediate	Sharp	Sharp	Intermediate	Sharp	Intermediate	Sharp	Sharp	Sharp	Sharp	Sharp	Intermediate	Intermediate	Broad	Sharp	Intermediate	Intermediate	Intermediate
chr17	79849598	79851098	+	NM_001002248	ANAPC11	coding gene	Intermediate	Intermediate	Intermediate	Sharp	Sharp	Intermediate	Sharp	Intermediate	Sharp	Sharp	Sharp	Sharp	Sharp	Intermediate	Intermediate	Broad	Sharp	Intermediate	Intermediate	Intermediate
chr17	79849817	79851317	+	NM_001002249	ANAPC11	coding gene	Intermediate	Intermediate	Intermediate	Sharp	Sharp	Intermediate	Sharp	Intermediate	Sharp	Sharp	Sharp	Sharp	Sharp	Intermediate	Intermediate	Broad	Sharp	Intermediate	Intermediate	Intermediate
chr12	123464879	123466379	+	NM_001002251	ANAPC11	coding gene	Intermediate	Intermediate	Intermediate	Intermediate	Intermediate	Intermediate	Intermediate	Intermediate	Intermediate	Intermediate	Sharp	Intermediate	Sharp	Broad	Intermediate	Broad	Sharp	Intermediate	Intermediate	Sharp
chr12	123464879	123466379	+	NM_001002252	ARL6IP4	coding gene	Intermediate	Intermediate	Intermediate	Intermediate	Intermediate	Intermediate	Intermediate	Intermediate	Intermediate	Intermediate	Sharp	Intermediate	Sharp	Broad	Intermediate	Broad	Sharp	Intermediate	Intermediate	Sharp
chrX	69268288	69269788	-	NM_001002254	ARL6IP4	coding gene	Non	Non	Non	Non	Non	Non	Non	Non	Non	Non	Non	Non	Non	Non	Non	Non	Non	Non	Non	Non
chr6	149721494	149722994	+	NM_001002255	AWAT2	coding gene	Non	Non	Non	Non	Non	Non	Non	Non	Non	Non	Non	Non	Non	Non	Non	Non	Non	Non	Non	Non
chr2	30670136	30671636	+	NM_001002257	SUMO4	coding gene	Sharp	Sharp	Sharp	Sharp	Sharp	Sharp	Sharp	Sharp	Sharp	Sharp	Sharp	Sharp	Sharp	Sharp	Sharp	Intermadiate	Sharp	Sharp	Sharp	Sharp
chr2	176044891	176046391	-	NM_001002258	LCLAT1	coding gene	Sharp	Sharp	Sharp	Sharp	Sharp	Sharp	Sharp	Sharp	Sharp	Sharp	Sharp	Sharp	Sharp	Sharp	Sharp	Intermadiate	Sharp	Sharp	Intermediate	Sharp
chr12	30905948	30907448	-	NM_001002259	ATP5MC3	coding gene	Sharp	Sharp	Sharp	Sharp	Sharp	Intermediate	Sharp	Sharp	Sharp	Sharp	Sharp	Sharp	Sharp	Sharp	Sharp	Sharp	Sharp	Sharp	Sharp	Sharp
chr10	99498233	99499733	+	NM_001002261	CAPRIN2	coding gene	Non	Non	Non	Non	Non	Non	Non	Non	Non	Non	Non	Sharp	Non	Sharp	Sharp	Intermadiate	Sharp	Non	Sharp	Non
chr10	99496877	99498377	+	NM_001002262	ZFYVE27	coding gene	Sharp	Sharp	Sharp	Sharp	Sharp	Sharp	Sharp	Sharp	Sharp	Sharp	Sharp	Sharp	Sharp	Sharp	Sharp	Intermadiate	Sharp	Sharp	Sharp	Sharp
chr13	43564877	43566377	-	NM_001002264	ZFYVE27	coding gene	Sharp	Sharp	Intermediate	Sharp	Sharp	Sharp	Sharp	Broad	Sharp	Intermediate	Sharp	Intermediate	Sharp	Intermediate	Sharp	Sharp	Sharp	Sharp	Sharp	Sharp
chr10	46088854	46090354	-	NM_001002265	EPSTI1	coding gene	Sharp	Sharp	Sharp	Sharp	Sharp	Intermediate	Intermediate	Intermediate	Sharp	Intermediate	Sharp	Intermediate	Sharp	Sharp	Sharp	Intermadiate	Sharp	Sharp	Intermediate	Sharp
chr10	46029319	46030819	-	NM_001002266	None	coding gene	Non	Non	Non	Non	Non	Non	Non	Non	Non	Non	Non	Non	Non	Non	Non	Non	Non	Non	Non	Non
chr9	37783567	37785067	-	NM_001002269	MARCHF8	coding gene	Sharp	Sharp	Sharp	Sharp	Sharp	Sharp	Sharp	Sharp	Sharp	Sharp	Sharp	Sharp	Sharp	Intermediate	Intermediate	Broad	Sharp	Sharp	Intermediate	Sharp
chr1	161632904	161634404	+	NM_001002273	EXOSC3	coding gene	Non	Non	Non	Non	Non	Non	Non	Non	Non	Non	Non	Non	Non	Non	Non	Non	Non	Non	Non	Non
chr1	161632904	161634404	+	NM_001002274	FCGR2B	coding gene	Non	Non	Non	Non	Non	Non	Non	Non	Non	Non	Non	Non	Non	Non	Non	Non	Non	Non	Non	Non
chr1	161632904	161634404	+	NM_001002275	FCGR2B	coding gene	Non	Non	Non	Non	Non	Non	Non	Non	Non	Non	Non	Non	Non	Non	Non	Non	Non	Non	Non	Non
chr1	68696729	68698229	-	NM_001002292	FCGR2B	coding gene	Non	Non	Non	Non	Non	Non	Sharp	Non	Sharp	Sharp	Non	Non	Non	Non	Non	Non	Non	Sharp	Non	Non
chr1	171060017	171061517	+	NM_001002294	WLS	coding gene	Non	Non	Non	Non	Non	Non	Non	Non	Non	Non	Non	Non	Non	Non	Non	Non	Non	Non	Non	Non
chr10	8096666	8098166	+	NM_001002295	FMO3	coding gene	Broad	Broad	Broad	Broad	Intermediate	Broad	Broad	Broad	Broad	Broad	Broad	Broad	Broad	Broad	Broad	Broad	Broad	Intermediate	Broad	Broad
chr8	41348172	41349672	+	NM_001002296	GATA3	coding gene	Sharp	Sharp	Sharp	Sharp	Sharp	Intermediate	Sharp	Sharp	Sharp	Sharp	Sharp	Sharp	Sharp	Sharp	Sharp	Intermadiate	Sharp	Sharp	Intermediate	Sharp
chr2	69663260	69664760	-	NM_001002755	GOLGA7	coding gene	Sharp	Sharp	Sharp	Sharp	Sharp	Sharp	Sharp	Sharp	Sharp	Sharp	Sharp	Sharp	Sharp	Sharp	Sharp	Sharp	Sharp	Sharp	Sharp	Sharp
chr2	69663260	69664760	-	NM_001002756	NFU1	coding gene	Sharp	Sharp	Sharp	Sharp	Sharp	Sharp	Sharp	Sharp	Sharp	Sharp	Sharp	Sharp	Sharp	Sharp	Sharp	Sharp	Sharp	Sharp	Sharp	Sharp
chrY	24240654	24242154	-	NM_001002758	NFU1	coding gene	Non	Non	Non	Non	Non	Non	Non	Non	Non	Non	Non	Non	Non	Non	Non	Non	Non	Non	Non	Non
chrY	24636543	24638043	+	NM_001002758_1	PRY2	coding gene	Non	Non	Non	Non	Non	Non	Non	Non	Non	Non	Non	Non	Non	Non	Non	Non	Non	Non	Non	Non
chr10	105881928	105883428	+	NM_001002759	None	coding gene	Sharp	Intermediate	Sharp	Sharp	Sharp	Intermediate	Sharp	Intermediate	Sharp	Sharp	Sharp	Sharp	Sharp	Intermediate	Sharp	Sharp	Sharp	Sharp	Intermediate	Sharp
chrY	27196751	27198251	-	NM_001002760	SFR1	coding gene	Non	Non	Non	Non	Non	Non	Non	Non	Non	Non	Non	Non	Non	Non	Non	Non	Non	Non	Non	Non
chrY	26764150	26765650	+	NM_001002760_1	BPY2	coding gene	Non	Non	Non	Non	Non	Non	Non	Non	Non	Non	Non	Non	Non	Non	Non	Non	Non	Non	Non	Non
chrY	25130409	25131909	+	NM_001002760_2	BPY2B	coding gene	Non	Non	Non	Non	Non	Non	Non	Non	Non	Non	Non	Non	Non	Non	Non	Non	Non	Non	Non	Non
chrY	27196751	27198251	-	NM_001002761	BPY2C	coding gene	Non	Non	Non	Non	Non	Non	Non	Non	Non	Non	Non	Non	Non	Non	Non	Non	Non	Non	Non	Non
chrY	25130409	25131909	+	NM_001002761_1	None	coding gene	Non	Non	Non	Non	Non	Non	Non	Non	Non	Non	Non	Non	Non	Non	Non	Non	Non	Non	Non	Non
chrY	26764150	26765650	+	NM_001002761_2	None	coding gene	Non	Non	Non	Non	Non	Non	Non	Non	Non	Non	Non	Non	Non	Non	Non	Non	Non	Non	Non	Non
chr10	74113407	74114907	-	NM_001002762	BPY2	coding gene	Intermediate	Sharp	Sharp	Sharp	Sharp	Sharp	Sharp	Sharp	Sharp	Sharp	Sharp	Sharp	Sharp	Intermediate	Sharp	Sharp	Sharp	Sharp	Sharp	Sharp
chr5	94416045	94417545	-	NM_001002796	BPY2B	coding gene	Intermediate	Sharp	Sharp	Sharp	Non	Intermediate	Sharp	Intermediate	Sharp	Sharp	Sharp	Intermediate	Non	Intermediate	Sharp	Intermadiate	Non	Sharp	Sharp	Non
chr3	160117429	160118929	+	NM_001002800	BPY2C	coding gene	Broad	Broad	Broad	Broad	Broad	Broad	Broad	Broad	Broad	Broad	Broad	Broad	Sharp	Broad	Broad	Broad	Broad	Broad	Broad	Broad
chr1	144993533	144995033	-	NM_001002810	None	coding gene	Non	Non	Non	Non	Non	Non	Non	Non	Non	Non	Non	Non	Non	Sharp	Non	Non	Non	Non	Non	Non
chr1	144930532	144932032	-	NM_001002811	None	coding gene	Sharp	Sharp	Sharp	Sharp	Sharp	Sharp	Intermediate	Intermediate	Broad	Broad	Sharp	Intermediate	Sharp	Broad	Sharp	Broad	Intermediate	Sharp	Broad	Broad
chr1	144993522	144995022	-	NM_001002812	DNAJB12	coding gene	Non	Non	Non	Non	Non	Non	Non	Non	Non	Non	Non	Non	Non	Sharp	Non	Non	Non	Non	Non	Non
chr8	37755515	37757015	-	NM_001002814	MCTP1	coding gene	Intermediate	Intermediate	Intermediate	Sharp	Intermediate	Sharp	Intermediate	Intermediate	Sharp	Intermediate	Sharp	Sharp	Sharp	Broad	Sharp	Intermadiate	Broad	Sharp	Intermediate	Broad
chr19	56631149	56632649	-	NM_001002836	SMC4	coding gene	Sharp	Sharp	Sharp	Sharp	Sharp	Intermediate	Sharp	Intermediate	Sharp	Sharp	Sharp	Sharp	Sharp	Sharp	Intermediate	Intermadiate	Sharp	Sharp	Intermediate	Sharp
chr22	31518960	31520460	+	NM_001002837	PDE4DIP	coding gene	Non	Non	Non	Non	Non	Non	Non	Non	Non	Non	Non	Non	Non	Non	Non	Non	Non	Non	Non	Non
chrX	54382938	54384438	-	NM_001002838	PDE4DIP	coding gene	Non	Sharp	Sharp	Sharp	Non	Non	Sharp	Non	Sharp	Sharp	Non	Sharp	Non	Non	Non	Non	Non	Sharp	Non	Non
chr17	45286427	45287927	+	NM_001002841	PDE4DIP	coding gene	Non	Non	Non	Non	Non	Non	Non	Non	Non	Non	Non	Non	Non	Non	Non	Non	Non	Non	Non	Non
chr15	57024287	57025787	-	NM_001002843	RAB11FIP1	coding gene	Broad	Broad	Sharp	Sharp	Sharp	Broad	Sharp	Sharp	Intermediate	Broad	Sharp	Intermediate	Sharp	Intermediate	Sharp	Non	Sharp	Sharp	Sharp	Sharp
chr15	57024287	57025787	-	NM_001002844	ZNF787	coding gene	Broad	Broad	Sharp	Sharp	Sharp	Broad	Sharp	Sharp	Intermediate	Broad	Sharp	Intermediate	Sharp	Intermediate	Sharp	Non	Sharp	Sharp	Sharp	Sharp
chr15	60688685	60690185	-	NM_001002857	INPP5J	coding gene	Sharp	Sharp	Sharp	Sharp	Sharp	Intermediate	Intermediate	Intermediate	Sharp	Sharp	Intermediate	Intermediate	Sharp	Broad	Sharp	Sharp	Sharp	Sharp	Intermediate	Sharp
chr15	60688685	60690185	-	NM_001002858	WNK3	coding gene	Sharp	Sharp	Sharp	Sharp	Sharp	Intermediate	Intermediate	Intermediate	Sharp	Sharp	Intermediate	Intermediate	Sharp	Broad	Sharp	Sharp	Sharp	Sharp	Intermediate	Sharp
chr14	93797885	93799385	-	NM_001002860	MYL4	coding gene	Intermediate	Sharp	Sharp	Sharp	Sharp	Sharp	Sharp	Broad	Sharp	Sharp	Sharp	Sharp	Sharp	Intermediate	Sharp	Broad	Sharp	Sharp	Intermediate	Intermediate
chr22	24179699	24181199	-	NM_001002862	ZNF280D	coding gene	Sharp	Sharp	Sharp	Sharp	Non	Sharp	Sharp	Sharp	Sharp	Sharp	Sharp	Sharp	Non	Sharp	Sharp	Sharp	Sharp	Sharp	Sharp	Non
chr22	42341648	42343148	-	NM_001002876	ZNF280D	coding gene	Sharp	Sharp	Sharp	Sharp	Sharp	Sharp	Sharp	Sharp	Sharp	Sharp	Sharp	Sharp	Sharp	Broad	Intermediate	Broad	Intermediate	Intermediate	Broad	Intermediate
chr22	29948236	29949736	-	NM_001002877	ANXA2	coding gene	Sharp	Sharp	Sharp	Sharp	Sharp	Sharp	Sharp	Sharp	Sharp	Sharp	Sharp	Sharp	Sharp	Sharp	Sharp	Sharp	Sharp	Sharp	Sharp	Sharp
chr22	29948144	29949644	-	NM_001002878	ANXA2	coding gene	Sharp	Sharp	Sharp	Sharp	Sharp	Sharp	Sharp	Sharp	Sharp	Sharp	Sharp	Sharp	Sharp	Sharp	Sharp	Sharp	Sharp	Sharp	Sharp	Sharp
chr22	29948144	29949644	-	NM_001002879	BTBD7	coding gene	Sharp	Sharp	Sharp	Sharp	Sharp	Sharp	Sharp	Sharp	Sharp	Sharp	Sharp	Sharp	Sharp	Sharp	Sharp	Sharp	Sharp	Sharp	Sharp	Sharp
chr22	39052657	39054157	+	NM_001002880	DERL3	coding gene	Sharp	Sharp	Sharp	Sharp	Sharp	Sharp	Sharp	Sharp	Sharp	Sharp	Sharp	Sharp	Sharp	Sharp	Sharp	Sharp	Sharp	Sharp	Sharp	Sharp
chr1	161692456	161693956	+	NM_001002901	CENPM	coding gene	Non	Non	Non	Non	Non	Non	Non	Non	Non	Non	Non	Non	Non	Non	Non	Non	Non	Non	Non	Non
chr11	124120422	124121922	+	NM_001002905	THOC5	coding gene	Non	Non	Non	Non	Non	Non	Non	Non	Non	Non	Non	Non	Non	Non	Non	Non	Non	Non	Non	Non
chrY	19880940	19882440	-	NM_001002906	THOC5	coding gene	Non	Non	Non	Non	Non	Non	Non	Non	Non	Non	Non	Non	Non	Non	Non	Non	Non	Non	Non	Non
chrY	20297334	20298834	+	NM_001002906_1	THOC5	coding gene	Non	Non	Non	Non	Non	Non	Non	Non	Non	Non	Non	Non	Non	Non	Non	Non	Non	Non	Non	Non
chr11	56113514	56115014	+	NM_001002907	CBY1	coding gene	Non	Non	Non	Non	Non	Non	Non	Non	Non	Non	Non	Non	Non	Non	Non	Non	Non	Non	Non	Non
chr17	42579457	42580957	-	NM_001002909	FCRLB	coding gene	Sharp	Sharp	Sharp	Intermediate	Sharp	Intermediate	Sharp	Intermediate	Sharp	Sharp	Sharp	Intermediate	Sharp	Intermediate	Intermediate	Broad	Sharp	Intermediate	Intermediate	Intermediate
chr16	20083600	20085100	-	NM_001002911	OR8G1	coding gene	Non	Non	Non	Non	Non	Non	Non	Non	Non	Non	Non	Non	Non	Non	Non	Non	Non	Non	Non	Non
chr1	75137922	75139422	-	NM_001002912	None	coding gene	Non	Non	Non	Non	Non	Non	Non	Non	Non	Non	Non	Non	Non	Non	Non	Non	Non	Non	Non	Non
chr9	130476436	130477936	-	NM_001002913	None	coding gene	Sharp	Sharp	Sharp	Sharp	Sharp	Sharp	Sharp	Sharp	Sharp	Sharp	Sharp	Sharp	Sharp	Sharp	Sharp	Sharp	Sharp	Sharp	Sharp	Sharp
chr17	7255207	7256707	+	NM_001002914	OR8K1	coding gene	Sharp	Sharp	Sharp	Sharp	Non	Sharp	Sharp	Sharp	Sharp	Sharp	Sharp	Sharp	Non	Non	Non	Non	Non	Sharp	Non	Non
chr19	46651038	46652538	+	NM_001002915	GPATCH8	coding gene	Non	Non	Non	Non	Non	Non	Non	Non	Non	Non	Non	Non	Non	Non	Non	Non	Non	Non	Non	Non
chrX	103266756	103268256	-	NM_001002916	GPR139	coding gene	Non	Non	Non	Non	Non	Non	Non	Non	Non	Non	Non	Non	Non	Non	Non	Non	Non	Non	Non	Non
chr11	124179162	124180662	-	NM_001002917	ERICH3	coding gene	Non	Non	Non	Non	Non	Non	Non	Non	Non	Non	Non	Non	Non	Non	Non	Non	Non	Non	Non	Non
chr11	124188593	124190093	-	NM_001002918	PTRH1	coding gene	Non	Non	Non	Non	Non	Non	Non	Non	Non	Non	Non	Non	Non	Non	Non	Non	Non	Non	Non	Non
chr2	286808	288308	-	NM_001002919	KCTD11	coding gene	Non	Sharp	Intermediate	Sharp	Sharp	Non	Sharp	Non	Sharp	Sharp	Sharp	Intermediate	Sharp	Non	Sharp	Non	Non	Non	Sharp	Non
chr8	43147584	43149084	+	NM_001002920	IGFL2	coding gene	Non	Non	Non	Non	Non	Non	Non	Non	Non	Non	Non	Non	Non	Non	Non	Non	Non	Non	Non	Non
chr19	46542774	46544274	-	NM_001002923	H2BW1	coding gene	Non	Non	Non	Non	Non	Non	Non	Non	Non	Non	Non	Non	Non	Non	Non	Non	Non	Non	Non	Non
chr11	56408415	56409915	-	NM_001002925	OR8D1	coding gene	Non	Non	Non	Non	Non	Non	Non	Non	Non	Non	Non	Non	Non	Non	Non	Non	Non	Non	Non	Non
chr7	19747160	19748660	-	NM_001002926	OR8D2	coding gene	Sharp	Sharp	Sharp	Sharp	Sharp	Sharp	Sharp	Broad	Sharp	Sharp	Sharp	Sharp	Sharp	Intermediate	Sharp	Broad	Sharp	Sharp	Intermediate	Sharp
chr15	69745158	69746658	+	NM_001003	ALKAL2	coding gene	Intermediate	Intermediate	Sharp	Intermediate	Sharp	Broad	Intermediate	Intermediate	Intermediate	Intermediate	Intermediate	Intermediate	Sharp	Intermediate	Intermediate	Intermadiate	Intermediate	Intermediate	Intermediate	Intermediate
chr6	125475419	125476919	+	NM_001003395	POTEA	coding gene	Sharp	Sharp	Sharp	Sharp	Non	Non	Sharp	Non	Sharp	Sharp	Non	Non	Non	Non	Non	Non	Non	Non	Non	Non
chr6	125474878	125476378	+	NM_001003396	IGFL4	coding gene	Sharp	Sharp	Sharp	Sharp	Non	Non	Sharp	Non	Sharp	Sharp	Non	Non	Non	Non	Non	Non	Non	Non	Non	Non
chr6	125474878	125476378	+	NM_001003397	OR5AP2	coding gene	Sharp	Sharp	Sharp	Sharp	Non	Non	Sharp	Non	Sharp	Sharp	Non	Non	Non	Non	Non	Non	Non	Non	Non	Non
chr12	32260184	32261684	+	NM_001003398	TWISTNB	coding gene	Intermediate	Intermediate	Sharp	Sharp	Sharp	Intermediate	Sharp	Sharp	Sharp	Intermediate	Sharp	Intermediate	Sharp	Intermediate	Intermediate	Broad	Intermediate	Intermediate	Intermediate	Intermediate
chr22	39966757	39968257	+	NM_001003406	RPLP1	coding gene	Non	Non	Non	Non	Non	Non	Non	Non	Non	Non	Non	Non	Non	Non	Non	Non	Non	Non	Non	Non
chr10	116442914	116444414	-	NM_001003407	TPD52L1	coding gene	Non	Non	Non	Non	Non	Non	Non	Non	Non	Non	Non	Non	Non	Non	Non	Non	Non	Non	Non	Non
chr10	116442914	116444414	-	NM_001003408	TPD52L1	coding gene	Non	Non	Non	Non	Non	Non	Non	Non	Non	Non	Non	Non	Non	Non	Non	Non	Non	Non	Non	Non
chr11	5968576	5970076	+	NM_001003443	TPD52L1	coding gene	Non	Non	Non	Non	Non	Non	Non	Non	Non	Non	Non	Non	Non	Non	Non	Non	Non	Non	Non	Non
chr18	45456012	45457512	-	NM_001003652	BICD1	coding gene	Intermediate	Intermediate	Intermediate	Intermediate	Sharp	Broad	Broad	Broad	Broad	Intermediate	Intermediate	Intermediate	Sharp	Sharp	Broad	Broad	Intermediate	Intermediate	Broad	Intermediate
chr1	226736500	226738000	+	NM_001003665	CACNA1I	coding gene	Non	Sharp	Sharp	Sharp	Non	Non	Sharp	Non	Sharp	Sharp	Sharp	Sharp	Non	Non	Sharp	Non	Non	Sharp	Sharp	Non
chr18	13611664	13613164	+	NM_001003674	ABLIM1	coding gene	Broad	Broad	Intermediate	Intermediate	Sharp	Broad	Broad	Broad	Broad	Broad	Broad	Broad	Non	Broad	Broad	Broad	Broad	Broad	Broad	Broad
chr18	13611664	13613164	+	NM_001003675	None	coding gene	Broad	Broad	Intermediate	Intermediate	Sharp	Broad	Broad	Broad	Broad	Broad	Broad	Broad	Non	Broad	Broad	Broad	Broad	Broad	Broad	Broad
chr11	46958250	46959750	+	NM_001003676	OR56A3	coding gene	Sharp	Sharp	Sharp	Sharp	Sharp	Sharp	Sharp	Sharp	Sharp	Sharp	Sharp	Sharp	Sharp	Sharp	Sharp	Sharp	Sharp	Sharp	Sharp	Sharp
chr11	46958250	46959750	+	NM_001003677	SMAD2	coding gene	Sharp	Sharp	Sharp	Sharp	Sharp	Sharp	Sharp	Sharp	Sharp	Sharp	Sharp	Sharp	Sharp	Sharp	Sharp	Sharp	Sharp	Sharp	Sharp	Sharp
chr11	46958250	46959750	+	NM_001003678	STUM	coding gene	Sharp	Sharp	Sharp	Sharp	Sharp	Sharp	Sharp	Sharp	Sharp	Sharp	Sharp	Sharp	Sharp	Sharp	Sharp	Sharp	Sharp	Sharp	Sharp	Sharp
chr1	65886334	65887834	+	NM_001003679	LDLRAD4	coding gene	Sharp	Sharp	Sharp	Sharp	Intermediate	Intermediate	Sharp	Broad	Sharp	Sharp	Sharp	Sharp	Sharp	Intermediate	Sharp	Broad	Sharp	Sharp	Intermediate	Sharp
chr1	65886334	65887834	+	NM_001003680	LDLRAD4	coding gene	Sharp	Sharp	Sharp	Sharp	Intermediate	Intermediate	Sharp	Broad	Sharp	Sharp	Sharp	Sharp	Sharp	Intermediate	Sharp	Broad	Sharp	Sharp	Intermediate	Sharp
chr22	35653444	35654944	+	NM_001003681	C11orf49	coding gene	Sharp	Sharp	Sharp	Sharp	Sharp	Intermediate	Sharp	Sharp	Sharp	Sharp	Sharp	Sharp	Sharp	Sharp	Sharp	Sharp	Sharp	Sharp	Intermediate	Sharp
chr1	29448921	29450421	-	NM_001003682	C11orf49	coding gene	Non	Sharp	Intermediate	Intermediate	Non	Non	Sharp	Non	Non	Sharp	Sharp	Intermediate	Non	Sharp	Non	Non	Non	Non	Sharp	Non
chr2	183385965	183387465	-	NM_001003683	C11orf49	coding gene	Non	Non	Non	Non	Non	Non	Non	Sharp	Non	Non	Non	Non	Non	Non	Non	Sharp	Non	Sharp	Non	Non
chr22	30163357	30164857	+	NM_001003684	LEPR	coding gene	Sharp	Sharp	Sharp	Sharp	Sharp	Intermediate	Sharp	Sharp	Sharp	Sharp	Sharp	Sharp	Sharp	Sharp	Intermediate	Intermadiate	Sharp	Sharp	Intermediate	Sharp
chr4	146403956	146405456	+	NM_001003688	LEPR	coding gene	Intermediate	Intermediate	Intermediate	Sharp	Sharp	Intermediate	Intermediate	Non	Sharp	Intermediate	Intermediate	Intermediate	Sharp	Sharp	Sharp	Intermadiate	Sharp	Intermediate	Intermediate	Sharp
chr6	43597278	43598778	+	NM_001003690	HMGXB4	coding gene	Sharp	Sharp	Sharp	Sharp	Sharp	Sharp	Sharp	Sharp	Sharp	Intermediate	Sharp	Sharp	Sharp	Intermediate	Sharp	Intermadiate	Sharp	Sharp	Intermediate	Sharp
chr22	30161469	30162969	-	NM_001003692	TMEM200B	coding gene	Sharp	Sharp	Sharp	Sharp	Sharp	Intermediate	Sharp	Sharp	Sharp	Sharp	Sharp	Sharp	Sharp	Sharp	Intermediate	Intermadiate	Sharp	Sharp	Intermediate	Sharp
chr6	31674683	31676183	+	NM_001003693	PDE1A	coding gene	Non	Non	Non	Non	Non	Non	Non	Non	Non	Non	Non	Non	Non	Non	Non	Non	Non	Non	Non	Non
chr3	9773433	9774933	+	NM_001003694	UQCR10	coding gene	Intermediate	Sharp	Sharp	Sharp	Sharp	Intermediate	Intermediate	Intermediate	Sharp	Sharp	Intermediate	Sharp	Sharp	Intermediate	Intermediate	Broad	Sharp	Sharp	Intermediate	Sharp
chr21	27106465	27107965	-	NM_001003696	SMAD1	coding gene	Intermediate	Intermediate	Intermediate	Intermediate	Sharp	Broad	Intermediate	Broad	Intermediate	Intermediate	Intermediate	Intermediate	Intermediate	Intermediate	Intermediate	Broad	Intermediate	Intermediate	Intermediate	Intermediate
chr21	27106465	27107965	-	NM_001003697	MAD2L1BP	coding gene	Intermediate	Intermediate	Intermediate	Intermediate	Sharp	Broad	Intermediate	Broad	Intermediate	Intermediate	Intermediate	Intermediate	Intermediate	Intermediate	Intermediate	Broad	Intermediate	Intermediate	Intermediate	Intermediate
chr6	7108085	7109585	+	NM_001003698	ZMAT5	coding gene	Intermediate	Intermediate	Intermediate	Intermediate	Intermediate	Broad	Intermediate	Broad	Intermediate	Intermediate	Intermediate	Intermediate	Intermediate	Intermediate	Intermediate	Broad	Intermediate	Intermediate	Broad	Intermediate
chr6	7108085	7109585	+	NM_001003699	LY6G6F	coding gene	Intermediate	Intermediate	Intermediate	Intermediate	Intermediate	Broad	Intermediate	Broad	Intermediate	Intermediate	Intermediate	Intermediate	Intermediate	Intermediate	Intermediate	Broad	Intermediate	Intermediate	Broad	Intermediate
chr6	7108085	7109585	+	NM_001003700	BRPF1	coding gene	Intermediate	Intermediate	Intermediate	Intermediate	Intermediate	Broad	Intermediate	Broad	Intermediate	Intermediate	Intermediate	Intermediate	Intermediate	Intermediate	Intermediate	Broad	Intermediate	Intermediate	Broad	Intermediate
chr21	27106465	27107965	-	NM_001003701	ATP5PF	coding gene	Intermediate	Intermediate	Intermediate	Intermediate	Sharp	Broad	Intermediate	Broad	Intermediate	Intermediate	Intermediate	Intermediate	Intermediate	Intermediate	Intermediate	Broad	Intermediate	Intermediate	Intermediate	Intermediate
chr7	143891291	143892791	-	NM_001003702	ATP5PF	coding gene	Sharp	Sharp	Sharp	Sharp	Sharp	Non	Sharp	Sharp	Sharp	Sharp	Sharp	Sharp	Non	Non	Non	Non	Non	Non	Non	Sharp
chr21	27106465	27107965	-	NM_001003703	RREB1	coding gene	Intermediate	Intermediate	Intermediate	Intermediate	Sharp	Broad	Intermediate	Broad	Intermediate	Intermediate	Intermediate	Intermediate	Intermediate	Intermediate	Intermediate	Broad	Intermediate	Intermediate	Intermediate	Intermediate
chr22	30821610	30823110	+	NM_001003704	RREB1	coding gene	Intermediate	Intermediate	Broad	Intermediate	Intermediate	Sharp	Intermediate	Intermediate	Intermediate	Intermediate	Sharp	Intermediate	Sharp	Broad	Broad	Broad	Intermediate	Intermediate	Intermediate	Intermediate
chr12	76952089	76953589	-	NM_001003712	RREB1	coding gene	Intermediate	Intermediate	Broad	Broad	Intermediate	Intermediate	Intermediate	Intermediate	Intermediate	Intermediate	Intermediate	Intermediate	Sharp	Sharp	Sharp	Broad	Sharp	Sharp	Intermediate	Intermediate
chr7	99062324	99063824	-	NM_001003713	ATP5PF	coding gene	Sharp	Sharp	Sharp	Sharp	Sharp	Sharp	Sharp	Sharp	Sharp	Sharp	Sharp	Sharp	Sharp	Sharp	Sharp	Intermadiate	Sharp	Sharp	Intermediate	Sharp
chr7	99062324	99063824	-	NM_001003714	ARHGEF35	coding gene	Sharp	Sharp	Sharp	Sharp	Sharp	Sharp	Sharp	Sharp	Sharp	Sharp	Sharp	Sharp	Sharp	Sharp	Sharp	Intermadiate	Sharp	Sharp	Intermediate	Sharp
chr17	73661769	73663269	-	NM_001003715	ATP5PF	coding gene	Sharp	Sharp	Sharp	Sharp	Sharp	Sharp	Sharp	Sharp	Sharp	Sharp	Sharp	Sharp	Sharp	Sharp	Intermediate	Intermadiate	Sharp	Sharp	Intermediate	Sharp
chr17	73661769	73663269	-	NM_001003716	MTFP1	coding gene	Sharp	Sharp	Sharp	Sharp	Sharp	Sharp	Sharp	Sharp	Sharp	Sharp	Sharp	Sharp	Sharp	Sharp	Intermediate	Intermadiate	Sharp	Sharp	Intermediate	Sharp
chr9	131266970	131268470	+	NM_001003722	OSBPL8	coding gene	Sharp	Sharp	Sharp	Sharp	Sharp	Sharp	Sharp	Sharp	Sharp	Sharp	Sharp	Sharp	Sharp	Sharp	Sharp	Sharp	Sharp	Sharp	Sharp	Sharp
chr11	7959567	7961067	-	NM_001003745	ATP5MF	coding gene	Non	Non	Non	Non	Non	Non	Non	Non	Non	Non	Non	Non	Non	Non	Non	Non	Non	Non	Non	Non
chr11	55860783	55862283	+	NM_001003750	ATP5MF	coding gene	Non	Non	Non	Non	Non	Non	Non	Non	Non	Non	Non	Non	Non	Non	Non	Non	Non	Non	Non	Non
chr6	53529006	53530506	-	NM_001003760	RECQL5	coding gene	Non	Non	Non	Non	Non	Non	Non	Non	Non	Non	Non	Non	Non	Non	Non	Non	Non	Non	Non	Non
chr17	73041574	73043074	-	NM_001003785	RECQL5	coding gene	Sharp	Sharp	Sharp	Sharp	Sharp	Intermediate	Sharp	Intermediate	Intermediate	Sharp	Sharp	Intermediate	Sharp	Sharp	Intermediate	Intermadiate	Sharp	Sharp	Intermediate	Sharp
chr17	61817830	61819330	-	NM_001003786	GLE1	coding gene	Intermediate	Sharp	Sharp	Sharp	Sharp	Intermediate	Intermediate	Intermediate	Sharp	Intermediate	Intermediate	Intermediate	Sharp	Sharp	Sharp	Sharp	Intermediate	Sharp	Intermediate	Sharp
chr17	61817830	61819330	-	NM_001003787	OR10A3	coding gene	Intermediate	Sharp	Sharp	Sharp	Sharp	Intermediate	Intermediate	Intermediate	Sharp	Intermediate	Intermediate	Intermediate	Sharp	Sharp	Sharp	Sharp	Intermediate	Sharp	Intermediate	Sharp
chr17	61817830	61819330	-	NM_001003788	OR8I2	coding gene	Intermediate	Sharp	Sharp	Sharp	Sharp	Intermediate	Intermediate	Intermediate	Sharp	Intermediate	Intermediate	Intermediate	Sharp	Sharp	Sharp	Sharp	Intermediate	Sharp	Intermediate	Sharp
chr22	51220587	51222087	-	NM_001003789	KLHL31	coding gene	Sharp	Sharp	Sharp	Sharp	Sharp	Sharp	Sharp	Sharp	Sharp	Sharp	Sharp	Sharp	Sharp	Sharp	Sharp	Sharp	Sharp	Sharp	Sharp	Sharp
chr8	37594196	37595696	+	NM_001003790	ATP5PD	coding gene	Intermediate	Sharp	Sharp	Sharp	Sharp	Intermediate	Intermediate	Intermediate	Sharp	Intermediate	Intermediate	Intermediate	Sharp	Intermediate	Intermediate	Intermadiate	Sharp	Intermediate	Intermediate	Intermediate
chr8	37594096	37595596	+	NM_001003791	STRADA	coding gene	Intermediate	Sharp	Sharp	Sharp	Sharp	Intermediate	Intermediate	Intermediate	Sharp	Intermediate	Intermediate	Intermediate	Sharp	Intermediate	Intermediate	Intermadiate	Sharp	Intermediate	Intermediate	Intermediate
chr3	29322802	29324302	+	NM_001003792	STRADA	coding gene	Sharp	Intermediate	Intermediate	Intermediate	Sharp	Sharp	Sharp	Sharp	Sharp	Sharp	Non	Sharp	Non	Sharp	Non	Sharp	Non	Non	Non	Sharp
chr3	29322802	29324302	+	NM_001003793	STRADA	coding gene	Sharp	Intermediate	Intermediate	Intermediate	Sharp	Sharp	Sharp	Sharp	Sharp	Sharp	Non	Sharp	Non	Sharp	Non	Sharp	Non	Non	Non	Sharp
chr3	127540593	127542093	-	NM_001003794	RABL2B	coding gene	Sharp	Sharp	Sharp	Sharp	Sharp	Sharp	Sharp	Broad	Sharp	Sharp	Sharp	Sharp	Sharp	Non	Sharp	Broad	Non	Sharp	Sharp	Non
chr7	74508346	74509846	+	NM_001003795	ERLIN2	coding gene	Sharp	Sharp	Intermediate	Intermediate	Sharp	Sharp	Intermediate	Intermediate	Sharp	Intermediate	Sharp	Sharp	Sharp	Sharp	Sharp	Sharp	Sharp	Sharp	Intermediate	Sharp
chr22	42083413	42084913	-	NM_001003796	ERLIN2	coding gene	Sharp	Sharp	Sharp	Sharp	Sharp	Intermediate	Sharp	Sharp	Sharp	Sharp	Sharp	Sharp	Sharp	Sharp	Sharp	Sharp	Sharp	Sharp	Intermediate	Sharp
chr7	38311748	38313248	-	NM_001003799	RBMS3	coding gene	Non	Non	Non	Non	Broad	Non	Non	Non	Non	Sharp	Non	Non	Non	Non	Non	Non	Non	Non	Non	Non
chr9	95525583	95527083	-	NM_001003800	RBMS3	coding gene	Intermediate	Intermediate	Intermediate	Intermediate	Sharp	Intermediate	Intermediate	Broad	Intermediate	Intermediate	Intermediate	Intermediate	Sharp	Broad	Intermediate	Broad	Intermediate	Intermediate	Intermediate	Sharp
chr7	150944249	150945749	-	NM_001003801	MGLL	coding gene	Sharp	Sharp	Sharp	Sharp	Non	Sharp	Sharp	Sharp	Sharp	Sharp	Sharp	Sharp	Sharp	Sharp	Sharp	Sharp	Non	Sharp	Sharp	Sharp
chr7	150972320	150973820	-	NM_001003802	GTF2IRD2B	coding gene	Non	Sharp	Sharp	Sharp	Non	Non	Sharp	Sharp	Sharp	Sharp	Non	Sharp	Non	Sharp	Sharp	Sharp	Sharp	Sharp	Sharp	Sharp
chr14	50779046	50780546	+	NM_001003803	SNU13	coding gene	Sharp	Sharp	Sharp	Sharp	Sharp	Sharp	Sharp	Sharp	Sharp	Sharp	Sharp	Sharp	Sharp	Sharp	Sharp	Sharp	Sharp	Sharp	Intermediate	Sharp
chr14	50779046	50780546	+	NM_001003805	None	coding gene	Sharp	Sharp	Sharp	Sharp	Sharp	Sharp	Sharp	Sharp	Sharp	Sharp	Sharp	Sharp	Sharp	Sharp	Sharp	Sharp	Sharp	Sharp	Intermediate	Sharp
chr7	38311748	38313248	-	NM_001003806	BICD2	coding gene	Non	Non	Non	Non	Broad	Non	Non	Non	Non	Sharp	Non	Non	Non	Non	Non	Non	Non	Non	Non	Non
chr18	3843858	3845358	-	NM_001003809	SMARCD3	coding gene	Non	Non	Non	Non	Non	Non	Non	Non	Non	Non	Non	Non	Non	Non	Non	Non	Non	Non	Non	Non
chr4	83293649	83295149	-	NM_001003810	SMARCD3	coding gene	Broad	Broad	Broad	Broad	Broad	Broad	Broad	Broad	Broad	Broad	Broad	Broad	Intermediate	Broad	Broad	Broad	Broad	Broad	Broad	Broad
chrX	70127067	70128567	-	NM_001003811	DMAC2L	coding gene	Non	Non	Non	Non	Non	Non	Non	Non	Non	Non	Non	Non	Non	Non	Non	Non	Non	Non	Non	Non
chr11	5617864	5619364	+	NM_001003818	DMAC2L	coding gene	Sharp	Sharp	Sharp	Sharp	Sharp	Sharp	Sharp	Sharp	Sharp	Sharp	Sharp	Sharp	Sharp	Sharp	Non	Non	Non	Non	Sharp	Non
chr11	5617864	5619364	+	NM_001003819	TRGC1	coding gene	Sharp	Sharp	Sharp	Sharp	Sharp	Sharp	Sharp	Sharp	Sharp	Sharp	Sharp	Sharp	Sharp	Sharp	Non	Non	Non	Non	Sharp	Non
chr11	5641173	5642673	+	NM_001003827	DLGAP1	coding gene	Non	Non	Non	Non	Non	Non	Non	Non	Non	Non	Non	Non	Non	Non	Non	Non	Non	Non	Non	Non
chr22	44395090	44396590	+	NM_001003828	HNRNPD	coding gene	Non	Non	Non	Non	Non	Non	Non	Non	Non	Non	Non	Non	Non	Non	Non	Non	Non	Non	Non	Non
chr5	1201709	1203209	+	NM_001003841	TEX11	coding gene	Non	Non	Non	Non	Non	Non	Non	Non	Non	Non	Non	Non	Non	Non	Non	Non	Non	Non	Non	Non
chr2	171571856	171573356	+	NM_001003845	TRIM6	coding gene	Sharp	Intermediate	Intermediate	Intermediate	Non	Non	Sharp	Non	Intermediate	Intermediate	Sharp	Sharp	Non	Non	Sharp	Non	Non	Sharp	Non	Non
chr22	20861885	20863385	+	NM_001003891	TRIM6-TRIM34	coding gene	Sharp	Sharp	Sharp	Sharp	Sharp	Intermediate	Sharp	Intermediate	Sharp	Sharp	Sharp	Intermediate	Sharp	Intermediate	Intermediate	Broad	Sharp	Sharp	Intermediate	Sharp
chr10	76816772	76818272	-	NM_001003892	TRIM34	coding gene	Non	Non	Non	Non	Non	Non	Non	Non	Non	Non	Non	Non	Non	Non	Non	Non	Non	Non	Non	Non
chrY	26192661	26194161	-	NM_001003894	PARVB	coding gene	Non	Non	Non	Non	Non	Non	Non	Non	Non	Non	Non	Non	Non	Non	Non	Non	Non	Non	Non	Non
chrY	27768263	27769763	+	NM_001003894_1	SLC6A19	coding gene	Non	Non	Non	Non	Non	Non	Non	Non	Non	Non	Non	Non	Non	Non	Non	Non	Non	Non	Non	Non
chrY	26192661	26194161	-	NM_001003895	SP5	coding gene	Non	Non	Non	Non	Non	Non	Non	Non	Non	Non	Non	Non	Non	Non	Non	Non	Non	Non	Non	Non
chrY	27768263	27769763	+	NM_001003895_1	MED15	coding gene	Non	Non	Non	Non	Non	Non	Non	Non	Non	Non	Non	Non	Non	Non	Non	Non	Non	Non	Non	Non
chr20	35918050	35919550	+	NM_001003897	DUPD1	coding gene	Sharp	Sharp	Sharp	Sharp	Sharp	Sharp	Sharp	Sharp	Sharp	Sharp	Sharp	Sharp	Sharp	Sharp	Sharp	Sharp	Sharp	Sharp	Intermediate	Sharp
chr17	29647267	29648767	-	NM_001003927	CDY1B	coding gene	Broad	Broad	Broad	Broad	Sharp	Broad	Broad	Intermediate	Broad	Broad	Broad	Intermediate	Non	Sharp	Sharp	Intermadiate	Intermediate	Intermediate	Intermediate	Intermediate
chr3	51976360	51977860	+	NM_001003931	None	coding gene	Sharp	Sharp	Sharp	Sharp	Sharp	Sharp	Sharp	Sharp	Sharp	Sharp	Sharp	Intermediate	Sharp	Sharp	Intermediate	Intermadiate	Sharp	Sharp	Intermediate	Intermediate
chr9	113098625	113100125	-	NM_001003936	CDY2A	coding gene	Non	Non	Non	Non	Non	Non	Non	Non	Non	Non	Non	Non	Non	Non	Non	Non	Non	Non	Non	Non
chr2	54481909	54483409	-	NM_001003937	None	coding gene	Non	Non	Non	Non	Non	Non	Non	Non	Non	Non	Non	Non	Non	Non	Non	Non	Non	Non	Non	Non
chr16	215972	217472	+	NM_001003938	MANBAL	coding gene	Non	Non	Non	Sharp	Non	Non	Non	Non	Non	Non	Non	Non	Non	Non	Non	Non	Non	Non	Non	Non
chr15	40399575	40401075	-	NM_001003940	EVI2A	coding gene	Broad	Broad	Broad	Intermediate	Sharp	Sharp	Sharp	Intermediate	Sharp	Intermediate	Intermediate	Sharp	Sharp	Sharp	Sharp	Broad	Sharp	Sharp	Sharp	Broad
chr7	44646120	44647620	+	NM_001003941	PARP3	coding gene	Sharp	Sharp	Sharp	Sharp	Sharp	Sharp	Sharp	Intermediate	Sharp	Sharp	Sharp	Intermediate	Sharp	Sharp	Sharp	Intermadiate	Sharp	Sharp	Sharp	Sharp
chr15	40396787	40398287	-	NM_001003942	TXNDC8	coding gene	Broad	Broad	Broad	Sharp	Non	Sharp	Sharp	Sharp	Non	Sharp	Non	Sharp	Non	Sharp	Sharp	Broad	Non	Sharp	Sharp	Broad
chr15	40396787	40398287	-	NM_001003943	TSPYL6	coding gene	Broad	Broad	Broad	Sharp	Non	Sharp	Sharp	Sharp	Non	Sharp	Non	Sharp	Non	Sharp	Sharp	Broad	Non	Sharp	Sharp	Broad
chr8	124748147	124749647	-	NM_001003954	HBM	coding gene	Non	Non	Non	Non	Non	Non	Non	Non	Non	Non	Non	Non	Non	Non	Non	Non	Non	Non	Non	Non
chr19	36630917	36632417	+	NM_001003962	BMF	coding gene	Sharp	Sharp	Sharp	Sharp	Sharp	Sharp	Sharp	Intermediate	Sharp	Sharp	Sharp	Sharp	Sharp	Sharp	Sharp	Sharp	Sharp	Sharp	Intermediate	Sharp
chr11	809935	811435	+	NM_001004	OGDH	coding gene	Intermediate	Sharp	Intermediate	Intermediate	Sharp	Intermediate	Intermediate	Intermediate	Intermediate	Sharp	Sharp	Intermediate	Sharp	Intermediate	Intermediate	Intermadiate	Intermediate	Intermediate	Broad	Intermediate
chr3	13590624	13592124	+	NM_001004019	BMF	coding gene	Intermediate	Sharp	Sharp	Broad	Non	Non	Sharp	Non	Sharp	Sharp	Sharp	Sharp	Non	Non	Sharp	Non	Sharp	Sharp	Broad	Non
chr1	206808880	206810380	+	NM_001004023	BMF	coding gene	Sharp	Sharp	Sharp	Sharp	Sharp	Intermediate	Intermediate	Intermediate	Sharp	Intermediate	Intermediate	Intermediate	Sharp	Sharp	Sharp	Intermadiate	Sharp	Intermediate	Intermediate	Sharp
chrX	101967103	101968603	+	NM_001004051	ANXA13	coding gene	Sharp	Sharp	Sharp	Sharp	Non	Sharp	Sharp	Non	Sharp	Sharp	Sharp	Sharp	Sharp	Non	Non	Non	Sharp	Sharp	Non	Non
chr11	6190056	6191556	-	NM_001004052	CAPNS1	coding gene	Non	Non	Non	Non	Non	Non	Non	Non	Non	Non	Non	Non	Non	Non	Non	Non	Non	Non	Non	Non
chr16	67259401	67260901	-	NM_001004055	RPLP2	coding gene	Sharp	Sharp	Sharp	Sharp	Sharp	Sharp	Sharp	Sharp	Sharp	Sharp	Sharp	Sharp	Sharp	Sharp	Sharp	Sharp	Sharp	Sharp	Intermediate	Sharp
chr4	2965342	2966842	+	NM_001004056	FBLN2	coding gene	Intermediate	Intermediate	Sharp	Intermediate	Sharp	Intermediate	Intermediate	Intermediate	Intermediate	Intermediate	Sharp	Intermediate	Sharp	Intermediate	Intermediate	Broad	Intermediate	Intermediate	Intermediate	Intermediate
chr4	2965342	2966842	+	NM_001004057	DYRK3	coding gene	Intermediate	Intermediate	Sharp	Intermediate	Sharp	Intermediate	Intermediate	Intermediate	Intermediate	Intermediate	Sharp	Intermediate	Sharp	Intermediate	Intermediate	Broad	Intermediate	Intermediate	Intermediate	Intermediate
chr11	55926293	55927793	-	NM_001004058	GPRASP2	coding gene	Non	Non	Non	Non	Non	Non	Non	Non	Non	Non	Non	Non	Non	Non	Non	Non	Non	Non	Non	Non
chr11	55418379	55419879	+	NM_001004059	OR52B2	coding gene	Non	Non	Non	Non	Non	Non	Non	Non	Non	Non	Non	Non	Non	Non	Non	Non	Non	Non	Non	Non
chr16	18571934	18573434	-	NM_001004060	LRRC29	coding gene	Sharp	Sharp	Sharp	Sharp	Sharp	Sharp	Sharp	Sharp	Sharp	Sharp	Sharp	Sharp	Sharp	Sharp	Sharp	Sharp	Sharp	Sharp	Intermediate	Sharp
chr14	20403766	20405266	+	NM_001004063	GRK4	coding gene	Non	Non	Non	Non	Non	Non	Non	Non	Non	Non	Non	Non	Non	Non	Non	Non	Non	Non	Non	Non
chr11	55903694	55905194	-	NM_001004064	GRK4	coding gene	Non	Non	Non	Non	Non	Non	Non	Non	Non	Non	Non	Non	Non	Non	Non	Non	Non	Non	Non	Non
chr9	112810877	112812377	+	NM_001004065	OR8K5	coding gene	Intermediate	Intermediate	Intermediate	Sharp	Sharp	Broad	Broad	Broad	Intermediate	Broad	Broad	Intermediate	Intermediate	Broad	Intermediate	Broad	Broad	Intermediate	Intermediate	Broad
chr16	16326388	16327888	+	NM_001004067	OR4S2	coding gene	Sharp	Sharp	Sharp	Sharp	Sharp	Sharp	Sharp	Sharp	Sharp	Sharp	Sharp	Sharp	Sharp	Sharp	Sharp	Non	Sharp	Sharp	Sharp	Sharp
chr5	176853686	176855186	+	NM_001004105	NOMO2	coding gene	Broad	Broad	Broad	Broad	Sharp	Broad	Broad	Broad	Broad	Broad	Intermediate	Broad	Sharp	Broad	Broad	Broad	Broad	Broad	Broad	Broad
chr5	176853686	176855186	+	NM_001004106	OR4K1	coding gene	Broad	Broad	Broad	Broad	Sharp	Broad	Broad	Broad	Broad	Broad	Intermediate	Broad	Sharp	Broad	Broad	Broad	Broad	Broad	Broad	Broad
chr11	55405833	55407333	+	NM_001004124	OR8J3	coding gene	Non	Non	Non	Non	Non	Non	Non	Non	Non	Non	Non	Non	Non	Non	Non	Non	Non	Non	Non	Non
chr9	25677356	25678856	-	NM_001004125	PALM2AKAP2	coding gene	Sharp	Sharp	Sharp	Sharp	Non	Non	Sharp	Non	Sharp	Sharp	Non	Sharp	Non	Non	Non	Non	Non	Non	Non	Non
chr13	52586522	52588022	+	NM_001004127	NOMO3	coding gene	Sharp	Sharp	Sharp	Sharp	Sharp	Intermediate	Sharp	Sharp	Sharp	Intermediate	Sharp	Intermediate	Sharp	Intermediate	Intermediate	Intermadiate	Sharp	Sharp	Intermediate	Intermediate
chr1	180123967	180125467	+	NM_001004128	GRK6	coding gene	Sharp	Sharp	Sharp	Sharp	Sharp	Sharp	Sharp	Intermediate	Sharp	Sharp	Sharp	Sharp	Sharp	Sharp	Sharp	Broad	Sharp	Sharp	Intermediate	Sharp
chr12	48595575	48597075	-	NM_001004134	GRK6	coding gene	Non	Non	Non	Non	Non	Non	Non	Non	Non	Non	Non	Non	Non	Non	Non	Non	Non	Non	Non	Non
chr7	143792200	143793700	+	NM_001004135	OR4P4	coding gene	Non	Non	Non	Non	Non	Non	Non	Non	Non	Non	Non	Non	Non	Non	Non	Non	Non	Non	Non	Non
chr1	248616098	248617598	+	NM_001004136	TUSC1	coding gene	Non	Non	Non	Non	Non	Non	Non	Non	Non	Non	Non	Non	Non	Non	Non	Non	Non	Non	Non	Non
chr11	4566420	4567920	+	NM_001004137	ALG11	coding gene	Non	Non	Non	Non	Non	Non	Non	Non	Non	Non	Non	Non	Non	Non	Non	Non	Non	Non	Non	Non
chr15	102461762	102463262	-	NM_001004195	QSOX1	coding gene	Non	Non	Non	Non	Non	Non	Non	Non	Non	Non	Non	Non	Non	Non	Non	Non	Non	Non	Non	Non
chr3	112051915	112053415	+	NM_001004196	OR10AD1	coding gene	Intermediate	Intermediate	Intermediate	Sharp	Sharp	Sharp	Intermediate	Intermediate	Sharp	Sharp	Intermediate	Sharp	Non	Non	Non	Intermadiate	Non	Sharp	Non	Non
chr10	45809556	45811056	-	NM_001004297	OR2A12	coding gene	Non	Non	Non	Non	Non	Non	Non	Non	Non	Non	Non	Non	Non	Non	Non	Non	Non	Non	Non	Non
chr10	128208510	128210010	-	NM_001004298	OR2T2	coding gene	Non	Non	Non	Non	Non	Non	Non	Non	Non	Non	Non	Non	Non	Non	Non	Non	Non	Non	Non	Non
chr19	53970988	53972488	+	NM_001004301	OR52M1	coding gene	Sharp	Sharp	Sharp	Sharp	Sharp	Sharp	Sharp	Sharp	Sharp	Sharp	Sharp	Intermediate	Sharp	Sharp	Sharp	Sharp	Sharp	Sharp	Intermediate	Sharp
chr1	57283869	57285369	-	NM_001004303	OR4F4	coding gene	Non	Non	Non	Non	Non	Non	Non	Non	Non	Non	Non	Non	Non	Non	Non	Non	Non	Non	Non	Non
chr12	53574534	53576034	+	NM_001004304	CD200	coding gene	Sharp	Intermediate	Intermediate	Intermediate	Sharp	Intermediate	Sharp	Intermediate	Intermediate	Intermediate	Sharp	Intermediate	Sharp	Intermediate	Intermediate	Broad	Intermediate	Intermediate	Intermediate	Intermediate
chr17	20797953	20799453	-	NM_001004306	OR13A1	coding gene	Non	Non	Sharp	Sharp	Non	Sharp	Sharp	Sharp	Sharp	Sharp	Non	Non	Non	Non	Non	Non	Non	Sharp	Non	Sharp
chrX	111326252	111327752	+	NM_001004308	C10orf90	coding gene	Non	Non	Non	Non	Non	Non	Non	Non	Non	Sharp	Non	Non	Non	Non	Non	Non	Non	Non	Non	Non
chr15	90895476	90896976	+	NM_001004309	ZNF813	coding gene	Sharp	Sharp	Sharp	Sharp	Sharp	Sharp	Sharp	Sharp	Sharp	Sharp	Sharp	Sharp	Sharp	Sharp	Sharp	Sharp	Sharp	Sharp	Sharp	Sharp
chr1	159772172	159773672	+	NM_001004310	FYB2	coding gene	Non	Non	Non	Non	Non	Non	Non	Non	Non	Non	Non	Non	Non	Non	Non	Non	Non	Non	Non	Non
chr2	71016275	71017775	-	NM_001004311	ZNF740	coding gene	Non	Non	Sharp	Sharp	Non	Non	Non	Sharp	Non	Sharp	Non	Non	Non	Non	Sharp	Non	Non	Non	Non	Non
chr3	187418845	187420345	-	NM_001004312	None	coding gene	Non	Non	Non	Non	Non	Non	Non	Non	Non	Non	Non	Non	Non	Non	Non	Non	Non	Non	Non	Non
chr17	10632146	10633646	-	NM_001004313	RTL4	coding gene	Sharp	Sharp	Sharp	Sharp	Sharp	Sharp	Sharp	Sharp	Sharp	Sharp	Sharp	Sharp	Sharp	Non	Non	Sharp	Non	Sharp	Sharp	Non
chr3	156544095	156545595	+	NM_001004316	ZNF774	coding gene	Sharp	Sharp	Sharp	Sharp	Sharp	Sharp	Sharp	Sharp	Sharp	Sharp	Sharp	Sharp	Sharp	Non	Non	Sharp	Sharp	Non	Non	Non
chr6	105404922	105406422	+	NM_001004317	FCRL6	coding gene	Non	Non	Non	Non	Non	Non	Non	Non	Non	Non	Non	Non	Non	Sharp	Non	Broad	Broad	Intermediate	Intermediate	Broad
chr19	39574944	39576444	+	NM_001004318	FIGLA	coding gene	Non	Non	Non	Non	Non	Non	Non	Non	Non	Non	Non	Non	Non	Non	Non	Non	Non	Non	Non	Non
chr1	156267928	156269428	-	NM_001004319	RTP2	coding gene	Non	Non	Non	Non	Non	Non	Non	Non	Non	Non	Non	Non	Non	Non	Non	Non	Non	Non	Non	Non
chr7	15600140	15601640	-	NM_001004320	TMEM220	coding gene	Non	Non	Non	Non	Non	Non	Non	Non	Non	Non	Non	Non	Non	Non	Non	Non	Non	Non	Non	Non
chr7	100060394	100061894	-	NM_001004323	LEKR1	coding gene	Non	Non	Non	Non	Non	Non	Non	Non	Non	Non	Non	Non	Non	Non	Non	Non	Non	Non	Non	Non
chr11	1618024	1619524	-	NM_001004325	LIN28B	coding gene	Non	Non	Non	Non	Non	Non	Non	Non	Non	Non	Non	Non	Non	Non	Non	Non	Non	Non	Non	Non
chr11	64981310	64982810	+	NM_001004326	ACP7	coding gene	Non	Non	Non	Sharp	Sharp	Sharp	Non	Sharp	Non	Non	Non	Non	Non	Non	Non	Broad	Non	Non	Intermediate	Non
chr12	8325149	8326649	+	NM_001004328	VHLL	coding gene	Non	Non	Non	Non	Non	Non	Non	Non	Non	Non	Non	Non	Non	Non	Non	Non	Non	Non	Non	Non
chr12	45443382	45444882	-	NM_001004329	AGMO	coding gene	Non	Non	Non	Non	Non	Non	Sharp	Non	Non	Sharp	Sharp	Sharp	Non	Non	Non	Non	Non	Non	Non	Non
chr12	93130264	93131764	+	NM_001004330	C7orf61	coding gene	Non	Non	Non	Non	Non	Non	Non	Non	Non	Non	Non	Non	Non	Non	Non	Non	Non	Non	Non	Non
chr17	6915735	6917235	+	NM_001004333	KRTAP5-2	coding gene	Broad	Broad	Broad	Broad	Broad	Broad	Broad	Broad	Broad	Broad	Broad	Broad	Sharp	Broad	Broad	Broad	Broad	Broad	Broad	Broad
chr17	36498193	36499693	-	NM_001004334	None	coding gene	Non	Non	Non	Non	Non	Non	Non	Non	Non	Non	Non	Non	Non	Non	Non	Non	Non	Non	Non	Non
chr1	53308182	53309682	+	NM_001004339	ZNF705A	coding gene	Sharp	Sharp	Sharp	Sharp	Non	Non	Sharp	Non	Sharp	Sharp	Non	Non	Non	Non	Sharp	Non	Sharp	Sharp	Non	Non
chr1	120934444	120935944	-	NM_001004340	DBX2	coding gene	Non	Non	Non	Non	Non	Non	Sharp	Sharp	Non	Sharp	Non	Non	Non	Non	Non	Non	Non	Non	Non	Non
chr1	157068100	157069600	-	NM_001004341	PLEKHG7	coding gene	Non	Non	Non	Non	Non	Non	Non	Non	Non	Non	Non	Non	Non	Non	Non	Non	Non	Non	Non	Non
chr1	231298673	231300173	+	NM_001004342	RNASEK	coding gene	Non	Non	Non	Non	Non	Non	Non	Non	Non	Non	Non	Non	Non	Non	Non	Non	Non	Non	Non	Non
chr1	242160885	242162385	-	NM_001004343	GPR179	coding gene	Non	Non	Non	Sharp	Non	Non	Sharp	Non	Non	Non	Non	Non	Non	Non	Non	Non	Non	Non	Non	Non
chr7	99905324	99906824	+	NM_001004351	ZYG11A	coding gene	Non	Non	Non	Non	Non	Non	Non	Non	Non	Non	Non	Non	Non	Non	Non	Non	Non	Non	Non	Non
chr9	26066672	26068172	+	NM_001004352	FCGR1B	coding gene	Non	Non	Non	Non	Non	Non	Non	Non	Non	Non	Non	Non	Non	Non	Non	Non	Non	Non	Non	Non
chr9	140145712	140147212	+	NM_001004353	ETV3L	coding gene	Non	Non	Non	Non	Non	Non	Non	Non	Non	Non	Non	Non	Non	Non	Non	Non	Non	Non	Sharp	Non
chr9	140195203	140196703	-	NM_001004354	TRIM67	coding gene	Sharp	Sharp	Sharp	Sharp	Sharp	Sharp	Sharp	Sharp	Sharp	Sharp	Sharp	Sharp	Sharp	Non	Sharp	Non	Sharp	Sharp	Sharp	Non
chr4	1005609	1007109	+	NM_001004356	MAP1LC3C	coding gene	Sharp	Intermediate	Intermediate	Intermediate	Non	Non	Intermediate	Intermediate	Intermediate	Intermediate	Intermediate	Intermediate	Non	Non	Sharp	Sharp	Intermediate	Intermediate	Intermediate	Non
chr4	1005759	1007259	+	NM_001004358	FGFRL1	coding gene	Sharp	Intermediate	Intermediate	Intermediate	Non	Non	Intermediate	Intermediate	Intermediate	Intermediate	Intermediate	Intermediate	Non	Non	Sharp	Sharp	Intermediate	Intermediate	Intermediate	Non
chr2	115919683	115921183	+	NM_001004360	DPP10	coding gene	Non	Non	Sharp	Sharp	Non	Non	Sharp	Non	Non	Non	Sharp	Non	Non	Non	Sharp	Non	Non	Non	Non	Non
chr21	43491425	43492925	+	NM_001004416	UMODL1	coding gene	Non	Non	Non	Non	Non	Non	Non	Non	Non	Non	Non	Non	Non	Non	Non	Non	Non	Non	Non	Non
chr12	9822308	9823808	+	NM_001004419	CLEC2D	coding gene	Non	Broad	Broad	Broad	Non	Non	Sharp	Non	Sharp	Broad	Non	Non	Non	Non	Non	Non	Sharp	Non	Non	Intermediate
chr22	38576261	38577761	-	NM_001004426	PLA2G6	coding gene	Sharp	Sharp	Sharp	Sharp	Sharp	Sharp	Sharp	Sharp	Sharp	Sharp	Sharp	Sharp	Sharp	Sharp	Sharp	Sharp	Sharp	Sharp	Sharp	Sharp
chr17	81037566	81039066	+	NM_001004431	METRNL	coding gene	Intermediate	Sharp	Intermediate	Intermediate	Sharp	Sharp	Intermediate	Intermediate	Intermediate	Intermediate	Intermediate	Intermediate	Sharp	Non	Sharp	Sharp	Non	Sharp	Intermediate	Non
chr1	151776382	151777882	-	NM_001004432	LINGO4	coding gene	Non	Non	Non	Non	Non	Non	Non	Non	Non	Non	Non	Non	Non	Non	Non	Non	Non	Non	Non	Non
chr1	26371104	26372604	-	NM_001004434	SLC30A2	coding gene	Non	Non	Non	Non	Non	Non	Non	Non	Non	Sharp	Sharp	Sharp	Non	Non	Non	Non	Non	Non	Non	Non
chr15	68722992	68724492	-	NM_001004439	ITGA11	coding gene	Non	Non	Non	Sharp	Non	Non	Sharp	Sharp	Non	Non	Sharp	Sharp	Non	Non	Sharp	Sharp	Non	Non	Non	Non
chr1	113263188	113264688	+	NM_001004440	TAFA3	coding gene	Non	Non	Non	Non	Non	Non	Non	Non	Non	Non	Non	Non	Non	Non	Non	Non	Non	Non	Non	Non
chr5	79864804	79866304	-	NM_001004441	ANKRD34B	coding gene	Sharp	Sharp	Sharp	Sharp	Non	Non	Sharp	Non	Sharp	Sharp	Sharp	Sharp	Sharp	Non	Sharp	Non	Sharp	Sharp	Sharp	Non
chr9	125390314	125391814	-	NM_001004450	OR1B1	coding gene	Non	Non	Non	Non	Non	Non	Non	Non	Non	Non	Non	Non	Non	Non	Non	Non	Non	Non	Non	Non
chr9	125238705	125240205	-	NM_001004451	OR1J1	coding gene	Non	Non	Non	Non	Non	Non	Non	Non	Non	Non	Non	Non	Non	Non	Non	Non	Non	Non	Non	Non
chr9	125281419	125282919	+	NM_001004452	OR1J4	coding gene	Non	Non	Non	Non	Non	Non	Non	Non	Non	Non	Non	Non	Non	Non	Non	Non	Non	Non	Non	Non
chr9	125512126	125513626	+	NM_001004453	OR1L6	coding gene	Non	Non	Non	Non	Non	Non	Non	Non	Non	Non	Non	Non	Non	Non	Non	Non	Non	Non	Non	Non
chr9	125329256	125330756	-	NM_001004454	OR1L8	coding gene	Non	Non	Non	Non	Non	Non	Non	Non	Non	Non	Non	Non	Non	Non	Non	Non	Non	Non	Non	Non
chr19	9203920	9205420	+	NM_001004456	OR1M1	coding gene	Non	Non	Non	Non	Non	Non	Non	Non	Non	Non	Non	Non	Non	Non	Non	Non	Non	Non	Non	Non
chr9	125315448	125316948	+	NM_001004457	OR1N2	coding gene	Non	Non	Non	Non	Non	Non	Non	Non	Non	Non	Non	Non	Non	Non	Non	Non	Non	Non	Non	Non
chr11	57982216	57983716	+	NM_001004458	OR1S1	coding gene	Non	Non	Non	Non	Non	Non	Non	Non	Non	Non	Non	Non	Non	Non	Non	Non	Non	Non	Non	Non
chr11	57970153	57971653	-	NM_001004459	OR1S2	coding gene	Non	Non	Non	Non	Non	Non	Non	Non	Non	Non	Non	Non	Non	Non	Non	Non	Non	Non	Non	Non
chr11	6890985	6892485	+	NM_001004460	OR10A2	coding gene	Non	Non	Non	Non	Non	Non	Non	Non	Non	Non	Non	Non	Non	Non	Non	Non	Non	Non	Non	Non
chr11	7948709	7950209	-	NM_001004461	OR10A6	coding gene	Non	Non	Non	Non	Non	Non	Non	Non	Non	Non	Non	Non	Non	Non	Non	Non	Non	Non	Non	Non
chr11	123886281	123887781	+	NM_001004462	OR10G4	coding gene	Non	Non	Non	Non	Non	Non	Non	Non	Non	Non	Non	Non	Non	Non	Non	Non	Non	Non	Non	Non
chr11	123908208	123909708	-	NM_001004463	OR10G7	coding gene	Non	Non	Non	Non	Non	Non	Non	Non	Non	Non	Non	Non	Non	Non	Non	Non	Non	Non	Non	Non
chr11	123900329	123901829	+	NM_001004464	OR10G8	coding gene	Non	Non	Non	Non	Non	Non	Non	Non	Non	Non	Non	Non	Non	Non	Non	Non	Non	Non	Non	Non
chr19	16059817	16061317	+	NM_001004465	OR10H4	coding gene	Non	Non	Non	Non	Non	Non	Non	Non	Non	Non	Non	Non	Non	Non	Non	Non	Non	Non	Non	Non
chr19	15904858	15906358	+	NM_001004466	OR10H5	coding gene	Non	Non	Non	Non	Non	Non	Non	Non	Non	Non	Non	Non	Non	Non	Non	Non	Non	Non	Non	Non
chr1	159282949	159284449	-	NM_001004467	OR10J3	coding gene	Non	Non	Non	Non	Non	Non	Non	Non	Non	Non	Non	Non	Non	Non	Non	Non	Non	Non	Non	Non
chr1	159504297	159505797	-	NM_001004469	OR10J5	coding gene	Non	Non	Non	Non	Non	Non	Non	Non	Non	Non	Non	Non	Non	Non	Non	Non	Non	Non	Non	Non
chr10	17494754	17496254	-	NM_001004470	ST8SIA6	coding gene	Sharp	Sharp	Sharp	Sharp	Non	Non	Broad	Sharp	Sharp	Sharp	Intermediate	Intermediate	Non	Non	Sharp	Sharp	Non	Intermediate	Intermediate	Non
chr11	57994890	57996390	-	NM_001004471	OR10Q1	coding gene	Non	Non	Non	Non	Non	Non	Non	Non	Non	Non	Non	Non	Non	Non	Non	Non	Non	Non	Non	Non
chr1	158449667	158451167	+	NM_001004472	OR10R2	coding gene	Non	Non	Non	Non	Non	Non	Non	Non	Non	Non	Non	Non	Non	Non	Sharp	Non	Non	Non	Non	Non
chr1	158435351	158436851	+	NM_001004473	OR10K1	coding gene	Non	Non	Non	Non	Non	Non	Non	Non	Non	Non	Non	Non	Non	Non	Non	Non	Non	Non	Non	Non
chr11	123846898	123848398	-	NM_001004474	OR10S1	coding gene	Non	Non	Non	Non	Non	Non	Non	Non	Non	Non	Non	Non	Non	Non	Non	Non	Non	Non	Non	Non
chr1	158367756	158369256	-	NM_001004475	OR10T2	coding gene	Broad	Sharp	Non	Non	Non	Broad	Non	Non	Non	Sharp	Non	Sharp	Non	Intermediate	Sharp	Non	Sharp	Non	Sharp	Non
chr1	158389156	158390656	-	NM_001004476	OR10K2	coding gene	Non	Non	Non	Non	Non	Non	Non	Non	Non	Non	Non	Non	Non	Non	Non	Non	Non	Non	Non	Non
chr1	158548189	158549689	-	NM_001004477	OR10X1	coding gene	Non	Non	Non	Non	Non	Non	Non	Non	Non	Non	Non	Non	Non	Non	Non	Non	Non	Non	Non	Non
chr1	158576228	158577728	+	NM_001004478	OR10Z1	coding gene	Non	Non	Non	Non	Non	Non	Non	Non	Non	Non	Non	Non	Non	Non	Non	Non	Non	Non	Non	Non
chr14	20710950	20712450	+	NM_001004479	OR11H4	coding gene	Non	Non	Non	Non	Non	Non	Non	Non	Non	Non	Non	Non	Non	Non	Non	Non	Non	Non	Non	Non
chr14	20691868	20693368	+	NM_001004480	OR11H6	coding gene	Non	Non	Non	Non	Non	Non	Non	Non	Non	Non	Non	Non	Non	Non	Non	Non	Non	Non	Non	Non
chr9	107366408	107367908	-	NM_001004481	OR13C2	coding gene	Non	Non	Non	Non	Non	Non	Non	Non	Non	Non	Non	Non	Non	Non	Non	Non	Non	Non	Non	Non
chr9	107360194	107361694	-	NM_001004482	OR13C5	coding gene	Non	Non	Non	Non	Non	Non	Non	Non	Non	Non	Non	Non	Non	Non	Non	Non	Non	Non	Non	Non
chr9	107331448	107332948	+	NM_001004483	OR13C8	coding gene	Non	Non	Non	Non	Non	Non	Non	Non	Non	Non	Non	Non	Non	Non	Non	Non	Non	Non	Non	Non
chr9	107456702	107458202	+	NM_001004484	OR13D1	coding gene	Non	Non	Non	Non	Non	Non	Non	Non	Non	Non	Non	Non	Non	Non	Non	Non	Non	Non	Non	Non
chr9	107266543	107268043	+	NM_001004485	OR13F1	coding gene	Non	Non	Non	Non	Non	Non	Non	Non	Non	Non	Non	Non	Non	Non	Non	Non	Non	Non	Non	Non
chrX	130678047	130679547	+	NM_001004486	OR13H1	coding gene	Non	Non	Non	Non	Non	Non	Non	Non	Non	Non	Non	Non	Non	Non	Non	Non	Non	Non	Non	Non
chr9	35868898	35870398	-	NM_001004487	OR13J1	coding gene	Non	Non	Non	Non	Non	Non	Non	Non	Non	Non	Non	Non	Non	Non	Non	Non	Non	Non	Non	Non
chr7	143771312	143772812	+	NM_001004488	OR2A25	coding gene	Non	Non	Non	Non	Non	Non	Non	Non	Non	Non	Non	Non	Non	Non	Non	Non	Non	Non	Non	Non
chr11	6806247	6807747	+	NM_001004489	OR2AG1	coding gene	Non	Non	Non	Non	Non	Non	Non	Non	Non	Non	Non	Non	Non	Non	Non	Non	Non	Non	Non	Non
chr11	6788688	6790188	-	NM_001004490	OR2AG2	coding gene	Non	Non	Non	Non	Non	Non	Non	Non	Non	Non	Non	Non	Non	Non	Non	Non	Non	Non	Non	Non
chr1	248128633	248130133	+	NM_001004491	OR2AK2	coding gene	Non	Non	Non	Non	Non	Non	Non	Non	Non	Non	Non	Non	Non	Non	Non	Non	Non	Non	Non	Non
chr1	247613784	247615284	-	NM_001004492	OR2B11	coding gene	Non	Non	Non	Non	Non	Non	Non	Non	Non	Non	Non	Non	Non	Non	Non	Non	Non	Non	Non	Non
chr11	6942232	6943732	+	NM_001004684	OR2D3	coding gene	Non	Non	Non	Non	Non	Non	Non	Non	Non	Non	Non	Non	Non	Non	Non	Non	Non	Non	Non	Non
chr7	143632325	143633825	+	NM_001004685	OR2F2	coding gene	Non	Non	Non	Non	Non	Non	Non	Non	Non	Non	Non	Non	Non	Non	Non	Non	Non	Non	Non	Non
chr1	248201473	248202973	+	NM_001004686	OR2L2	coding gene	Non	Non	Non	Non	Non	Non	Non	Non	Non	Non	Non	Non	Non	Non	Non	Non	Non	Non	Non	Non
chr1	248223983	248225483	+	NM_001004687	OR2L3	coding gene	Non	Non	Non	Non	Non	Non	Non	Non	Non	Non	Non	Non	Non	Non	Non	Non	Non	Non	Non	Non
chr1	248343287	248344787	+	NM_001004688	OR2M2	coding gene	Non	Non	Non	Non	Non	Non	Non	Non	Non	Non	Non	Non	Non	Non	Non	Non	Non	Non	Non	Non
chr1	248366369	248367869	+	NM_001004689	OR2M3	coding gene	Non	Non	Non	Non	Non	Non	Non	Non	Non	Non	Non	Non	Non	Non	Non	Non	Non	Non	Non	Non
chr1	248308449	248309949	+	NM_001004690	OR2M5	coding gene	Non	Non	Non	Non	Non	Non	Non	Non	Non	Non	Non	Non	Non	Non	Non	Non	Non	Non	Non	Non
chr1	248486370	248487870	-	NM_001004691	OR2M7	coding gene	Non	Non	Non	Non	Non	Non	Non	Non	Non	Non	Non	Non	Non	Non	Non	Non	Non	Non	Non	Non
chr1	248457380	248458880	-	NM_001004692	OR2T12	coding gene	Non	Non	Non	Non	Non	Non	Non	Non	Non	Non	Non	Non	Non	Non	Non	Non	Non	Non	Non	Non
chr1	248755569	248757069	-	NM_001004693	OR2T10	coding gene	Non	Non	Non	Non	Non	Non	Non	Non	Non	Non	Non	Non	Non	Non	Non	Non	Non	Non	Non	Non
chr1	248721292	248722792	-	NM_001004694	OR2T29	coding gene	Non	Non	Non	Non	Non	Non	Non	Non	Non	Non	Non	Non	Non	Non	Non	Non	Non	Non	Non	Non
chr1	248435616	248437116	-	NM_001004695	OR2T33	coding gene	Non	Non	Non	Non	Non	Non	Non	Non	Non	Non	Non	Non	Non	Non	Non	Non	Non	Non	Non	Non
chr1	248524882	248526382	+	NM_001004696	OR2T4	coding gene	Non	Non	Non	Non	Non	Non	Non	Non	Non	Non	Non	Non	Non	Non	Non	Non	Non	Non	Non	Non
chr1	248651889	248653389	+	NM_001004697	OR2T5	coding gene	Non	Non	Non	Non	Non	Non	Non	Non	Non	Non	Non	Non	Non	Non	Non	Non	Non	Non	Non	Non
chr1	247654369	247655869	+	NM_001004698	OR2W5	coding gene	Non	Non	Non	Non	Non	Non	Non	Non	Non	Non	Non	Non	Non	Non	Non	Non	Non	Non	Non	Non
chr19	8841390	8842890	+	NM_001004699	OR2Z1	coding gene	Non	Non	Non	Non	Non	Non	Non	Non	Non	Non	Non	Non	Non	Non	Non	Non	Non	Non	Non	Non
chr11	55370374	55371874	-	NM_001004700	OR4C11	coding gene	Non	Non	Non	Non	Non	Non	Non	Non	Non	Non	Non	Non	Non	Non	Non	Non	Non	Non	Non	Non
chr11	55339603	55341103	+	NM_001004701	OR4C16	coding gene	Non	Non	Non	Non	Non	Non	Non	Non	Non	Non	Non	Non	Non	Non	Non	Non	Non	Non	Non	Non
chr11	48346492	48347992	+	NM_001004702	OR4C3	coding gene	Non	Non	Non	Non	Non	Non	Non	Non	Non	Non	Non	Non	Non	Non	Non	Non	Non	Non	Non	Non
chr11	51515281	51516781	+	NM_001004703	OR4C46	coding gene	Non	Non	Non	Non	Non	Non	Non	Non	Non	Non	Non	Non	Non	Non	Non	Non	Non	Non	Non	Non
chr11	55432642	55434142	+	NM_001004704	OR4C6	coding gene	Non	Non	Non	Non	Non	Non	Non	Non	Non	Non	Non	Non	Non	Non	Non	Non	Non	Non	Non	Non
chr11	59244902	59246402	+	NM_001004705	OR4D10	coding gene	Non	Non	Non	Non	Non	Non	Non	Non	Non	Non	Non	Non	Non	Non	Non	Non	Non	Non	Non	Non
chr11	59271048	59272548	+	NM_001004706	OR4D11	coding gene	Non	Non	Non	Non	Non	Non	Non	Non	Non	Non	Non	Non	Non	Non	Non	Non	Non	Non	Non	Non
chr17	56247016	56248516	+	NM_001004707	OR4D2	coding gene	Non	Non	Non	Non	Non	Non	Non	Non	Non	Non	Non	Non	Non	Non	Non	Non	Non	Non	Non	Non
chr11	59224433	59225933	+	NM_001004708	OR4D6	coding gene	Non	Non	Non	Non	Non	Non	Non	Non	Non	Non	Non	Non	Non	Non	Non	Non	Non	Non	Non	Non
chr11	59282385	59283885	+	NM_001004711	OR4D9	coding gene	Non	Non	Non	Non	Non	Non	Non	Non	Non	Non	Non	Non	Non	Non	Non	Non	Non	Non	Non	Non
chr14	20481852	20483352	-	NM_001004712	OR4K14	coding gene	Non	Non	Non	Non	Non	Non	Non	Non	Non	Non	Non	Non	Non	Non	Non	Non	Non	Non	Non	Non
chr19	15197876	15199376	+	NM_001004713	OR1I1	coding gene	Non	Non	Non	Non	Non	Non	Non	Non	Non	Non	Non	Non	Non	Non	Non	Non	Non	Non	Non	Non
chr14	20501417	20502917	-	NM_001004714	OR4K13	coding gene	Non	Non	Non	Non	Non	Non	Non	Non	Non	Non	Non	Non	Non	Non	Non	Non	Non	Non	Non	Non
chr14	20585565	20587065	+	NM_001004715	OR4K17	coding gene	Non	Non	Non	Non	Non	Non	Non	Non	Non	Non	Non	Non	Non	Non	Non	Non	Non	Non	Non	Non
chr14	20528203	20529703	+	NM_001004717	OR4L1	coding gene	Non	Non	Non	Non	Non	Non	Non	Non	Non	Non	Non	Non	Non	Non	Non	Non	Non	Non	Non	Non
chr15	22368477	22369977	+	NM_001004719	OR4M2	coding gene	Non	Non	Non	Non	Non	Non	Non	Non	Non	Non	Non	Non	Sharp	Non	Non	Non	Non	Non	Non	Non
chr2	106468203	106469703	+	NM_001004720	NCK2	coding gene	Non	Non	Non	Non	Non	Non	Non	Non	Non	Non	Non	Non	Non	Non	Non	Non	Non	Non	Non	Non
chr2	106361519	106363019	+	NM_001004722	NCK2	coding gene	Intermediate	Intermediate	Intermediate	Intermediate	Sharp	Intermediate	Intermediate	Intermediate	Intermediate	Intermediate	Intermediate	Intermediate	Sharp	Intermediate	Sharp	Intermadiate	Sharp	Sharp	Intermediate	Intermediate
chr14	20295607	20297107	+	NM_001004723	OR4N2	coding gene	Non	Non	Non	Non	Non	Non	Non	Non	Non	Non	Non	Non	Non	Non	Non	Non	Non	Non	Non	Non
chr14	20611894	20613394	+	NM_001004724	OR4N5	coding gene	Non	Non	Non	Non	Non	Non	Non	Non	Non	Non	Non	Non	Non	Non	Non	Non	Non	Non	Non	Non
chr11	48327774	48329274	+	NM_001004725	OR4S1	coding gene	Non	Non	Non	Non	Non	Non	Non	Non	Non	Non	Non	Non	Non	Non	Non	Non	Non	Non	Non	Non
chr11	48285412	48286912	+	NM_001004726	OR4X1	coding gene	Non	Non	Non	Non	Non	Non	Non	Non	Non	Non	Non	Non	Non	Non	Non	Non	Non	Non	Non	Non
chr11	48266655	48268155	+	NM_001004727	OR4X2	coding gene	Non	Non	Non	Non	Non	Non	Non	Non	Non	Non	Non	Non	Non	Non	Non	Non	Non	Non	Non	Non
chr11	59210641	59212141	+	NM_001004728	OR5A1	coding gene	Non	Non	Non	Non	Non	Non	Non	Non	Non	Non	Non	Non	Non	Non	Non	Non	Non	Non	Non	Non
chr11	59131931	59133431	+	NM_001004729	OR5AN1	coding gene	Non	Non	Non	Non	Non	Non	Non	Non	Non	Non	Non	Non	Non	Non	Non	Non	Non	Non	Non	Non
chr11	56431161	56432661	+	NM_001004730	OR5AR1	coding gene	Non	Non	Non	Non	Non	Non	Non	Non	Non	Non	Non	Non	Non	Non	Non	Non	Non	Non	Non	Non
chr14	21622684	21624184	-	NM_001004731	OR5AU1	coding gene	Non	Non	Non	Non	Non	Non	Non	Non	Non	Non	Non	Non	Non	Non	Non	Non	Non	Non	Non	Non
chr11	58206146	58207646	-	NM_001004733	OR5B12	coding gene	Non	Non	Non	Non	Non	Non	Non	Non	Non	Non	Non	Non	Non	Non	Non	Non	Non	Non	Non	Non
chr1	248844105	248845605	-	NM_001004734	OR14I1	coding gene	Non	Non	Non	Non	Non	Non	Non	Non	Non	Non	Non	Non	Non	Non	Non	Non	Non	Non	Non	Non
chr11	55563031	55564531	+	NM_001004735	OR5D14	coding gene	Non	Non	Non	Non	Non	Non	Non	Non	Non	Non	Non	Non	Non	Non	Non	Non	Non	Non	Non	Non
chr3	98188420	98189920	+	NM_001004736	OR5K1	coding gene	Non	Non	Non	Non	Non	Non	Non	Non	Non	Non	Non	Non	Non	Non	Non	Non	Non	Non	Non	Non
chr3	98216524	98218024	+	NM_001004737	OR5K2	coding gene	Non	Non	Non	Non	Non	Non	Non	Non	Non	Non	Non	Non	Non	Non	Non	Non	Non	Non	Non	Non
chr11	55578942	55580442	+	NM_001004738	OR5L1	coding gene	Non	Non	Non	Non	Non	Non	Non	Non	Non	Non	Non	Non	Non	Non	Non	Non	Non	Non	Non	Non
chr11	55594694	55596194	+	NM_001004739	OR5L2	coding gene	Non	Non	Non	Non	Non	Non	Non	Non	Non	Non	Non	Non	Non	Non	Non	Non	Non	Non	Non	Non
chr11	56379478	56380978	-	NM_001004740	OR5M1	coding gene	Non	Non	Non	Non	Non	Non	Non	Non	Non	Non	Non	Non	Non	Non	Non	Non	Non	Non	Non	Non
chr11	56343697	56345197	-	NM_001004741	OR5M10	coding gene	Non	Non	Non	Non	Non	Non	Non	Non	Non	Non	Non	Non	Non	Non	Non	Non	Non	Non	Non	Non
chr11	56236514	56238014	-	NM_001004742	OR5M3	coding gene	Non	Non	Non	Non	Non	Non	Non	Non	Non	Non	Non	Non	Non	Non	Non	Non	Non	Non	Non	Non
chr11	56229377	56230877	-	NM_001004743	OR5M9	coding gene	Non	Non	Non	Non	Non	Non	Non	Non	Non	Sharp	Non	Non	Non	Non	Non	Non	Non	Non	Non	Non
chr11	56184208	56185708	-	NM_001004744	OR5R1	coding gene	Non	Non	Non	Non	Non	Non	Non	Non	Non	Non	Non	Non	Non	Non	Non	Non	Non	Non	Non	Non
chr11	56043114	56044614	+	NM_001004745	OR5T1	coding gene	Non	Non	Non	Non	Non	Non	Non	Non	Non	Non	Non	Non	Non	Non	Non	Non	Non	Non	Non	Non
chr11	55999161	56000661	-	NM_001004746	OR5T2	coding gene	Non	Non	Non	Non	Non	Non	Non	Non	Non	Non	Non	Non	Non	Non	Non	Non	Non	Non	Non	Non
chr11	56019675	56021175	+	NM_001004747	OR5T3	coding gene	Non	Non	Non	Non	Non	Non	Non	Non	Non	Non	Non	Non	Non	Non	Non	Non	Non	Non	Non	Non
chr11	4975443	4976943	-	NM_001004748	OR51A2	coding gene	Non	Non	Non	Non	Non	Non	Non	Non	Non	Non	Non	Non	Non	Non	Non	Non	Non	Non	Non	Non
chr11	4928599	4930099	+	NM_001004749	OR51A7	coding gene	Non	Non	Non	Non	Non	Non	Non	Non	Non	Non	Non	Non	Non	Non	Non	Non	Non	Non	Non	Non
chr11	5372737	5374237	+	NM_001004750	OR51B6	coding gene	Non	Non	Non	Non	Non	Non	Non	Non	Non	Non	Non	Non	Non	Non	Non	Non	Non	Non	Non	Non
chr11	4660944	4662444	+	NM_001004751	OR51D1	coding gene	Non	Non	Non	Non	Non	Non	Non	Non	Non	Non	Non	Non	Non	Non	Non	Non	Non	Non	Non	Non
chr11	4789647	4791147	-	NM_001004752	OR51F1	coding gene	Non	Non	Non	Non	Non	Non	Non	Non	Non	Non	Non	Non	Non	Non	Non	Non	Non	Non	Non	Non
chr11	4842615	4844115	+	NM_001004753	OR51F2	coding gene	Non	Non	Non	Non	Non	Non	Non	Non	Non	Non	Non	Non	Non	Non	Non	Non	Non	Non	Non	Non
chr11	5474637	5476137	+	NM_001004754	OR51I2	coding gene	Non	Non	Non	Non	Non	Non	Non	Non	Non	Non	Non	Non	Non	Non	Non	Non	Non	Non	Non	Non
chr11	5020212	5021712	+	NM_001004755	OR51L1	coding gene	Non	Non	Non	Non	Non	Non	Non	Non	Non	Non	Non	Non	Non	Non	Non	Non	Non	Non	Non	Non
chr11	5410606	5412106	+	NM_001004756	OR51M1	coding gene	Non	Non	Non	Non	Non	Non	Non	Non	Non	Non	Non	Non	Non	Non	Non	Non	Non	Non	Non	Non
chr11	5443340	5444840	+	NM_001004757	OR51Q1	coding gene	Non	Non	Non	Non	Non	Non	Non	Non	Non	Non	Non	Non	Non	Non	Non	Non	Non	Non	Non	Non
chr11	4868938	4870438	-	NM_001004758	OR51S1	coding gene	Non	Non	Non	Non	Non	Non	Non	Non	Non	Non	Non	Non	Non	Non	Non	Non	Non	Non	Non	Non
chr11	4903048	4904548	+	NM_001004759	OR51T1	coding gene	Non	Non	Non	Non	Non	Non	Non	Non	Non	Non	Non	Non	Non	Non	Non	Non	Non	Non	Non	Non
chr11	5220430	5221930	-	NM_001004760	OR51V1	coding gene	Non	Non	Non	Non	Non	Non	Non	Non	Non	Non	Non	Non	Non	Non	Non	Non	Non	Non	Non	Non
chr11	75110534	75112034	+	NM_001005	RPS3	coding gene	Sharp	Sharp	Sharp	Sharp	Sharp	Intermediate	Sharp	Broad	Sharp	Sharp	Sharp	Intermediate	Sharp	Broad	Intermediate	Broad	Sharp	Intermediate	Intermediate	Intermediate
chr3	53078589	53080089	-	NM_001005158	None	coding gene	Intermediate	Sharp	Intermediate	Sharp	Sharp	Intermediate	Sharp	Sharp	Sharp	Intermediate	Sharp	Intermediate	Sharp	Intermediate	Intermediate	Sharp	Intermediate	Sharp	Intermediate	Sharp
chr3	53077835	53079335	-	NM_001005159	None	coding gene	Intermediate	Sharp	Intermediate	Sharp	Sharp	Intermediate	Sharp	Sharp	Sharp	Sharp	Sharp	Intermediate	Sharp	Intermediate	Intermediate	Sharp	Intermediate	Sharp	Intermediate	Sharp
chr11	5152372	5153872	-	NM_001005160	OR52A5	coding gene	Non	Non	Non	Non	Non	Non	Non	Non	Non	Non	Non	Non	Non	Non	Non	Non	Non	Non	Non	Non
chr11	4388116	4389616	-	NM_001005161	OR52B4	coding gene	Non	Non	Non	Non	Non	Non	Non	Non	Non	Non	Non	Non	Non	Non	Non	Non	Non	Non	Non	Non
chr11	5602106	5603606	+	NM_001005162	OR52B6	coding gene	Non	Non	Non	Non	Non	Non	Non	Non	Non	Non	Non	Non	Non	Non	Non	Non	Non	Non	Non	Non
chr11	5509914	5511414	+	NM_001005163	OR52D1	coding gene	Non	Non	Non	Non	Non	Non	Non	Non	Non	Non	Non	Non	Non	Non	Non	Non	Non	Non	Non	Non
chr11	5079357	5080857	-	NM_001005164	OR52E2	coding gene	Non	Non	Non	Non	Non	Non	Non	Non	Non	Non	Non	Non	Non	Non	Non	Non	Non	Non	Non	Non
chr11	5905522	5907022	+	NM_001005165	OR52E4	coding gene	Non	Non	Non	Non	Non	Non	Non	Non	Non	Non	Non	Non	Non	Non	Non	Non	Non	Non	Non	Non
chr11	5861627	5863127	-	NM_001005167	OR52E6	coding gene	Non	Non	Non	Non	Non	Non	Non	Non	Non	Non	Non	Non	Non	Non	Non	Non	Non	Non	Non	Non
chr11	5877432	5878932	-	NM_001005168	OR52E8	coding gene	Non	Non	Non	Non	Non	Non	Non	Non	Non	Non	Non	Non	Non	Non	Non	Non	Non	Non	Non	Non
chr11	4615268	4616768	+	NM_001005169	OR52I1	coding gene	Non	Non	Non	Non	Non	Non	Non	Non	Non	Non	Non	Non	Non	Non	Non	Non	Non	Non	Non	Non
chr11	4608020	4609520	+	NM_001005170	OR52I2	coding gene	Non	Non	Non	Non	Non	Non	Non	Non	Non	Non	Non	Non	Non	Non	Non	Non	Non	Non	Non	Non
chr11	4510108	4511608	+	NM_001005171	OR52K1	coding gene	Non	Non	Non	Non	Non	Non	Non	Non	Non	Non	Non	Non	Non	Non	Non	Non	Non	Non	Non	Non
chr11	4470524	4472024	+	NM_001005172	OR52K2	coding gene	Non	Non	Non	Non	Non	Non	Non	Non	Non	Non	Non	Non	Non	Non	Non	Non	Non	Non	Non	Non
chr11	6006715	6008215	-	NM_001005173	OR52L1	coding gene	Non	Non	Non	Non	Non	Non	Non	Non	Non	Non	Non	Non	Non	Non	Non	Non	Non	Non	Non	Non
chr11	5841565	5843065	+	NM_001005174	OR52N2	coding gene	Non	Non	Non	Non	Non	Non	Non	Non	Non	Non	Non	Non	Non	Non	Non	Non	Non	Non	Non	Non
chr11	5775922	5777422	+	NM_001005175	OR52N4	coding gene	Non	Non	Non	Non	Non	Non	Non	Non	Non	Non	Non	Non	Non	Non	Non	Non	Non	Non	Non	Non
chr2	231090444	231091944	+	NM_001005176	SP140	coding gene	Non	Non	Sharp	Non	Non	Sharp	Non	Non	Sharp	Sharp	Non	Non	Non	Non	Non	Non	Sharp	Non	Sharp	Intermediate
chr11	4824110	4825610	-	NM_001005177	OR52R1	coding gene	Non	Non	Non	Non	Non	Non	Non	Non	Non	Non	Non	Non	Non	Non	Non	Non	Non	Non	Non	Non
chr11	6220453	6221953	+	NM_001005178	OR52W1	coding gene	Non	Non	Non	Non	Non	Non	Non	Non	Non	Non	Non	Non	Non	Non	Non	Non	Non	Non	Non	Non
chr11	6022878	6024378	-	NM_001005179	OR56A4	coding gene	Non	Non	Non	Non	Non	Non	Non	Non	Non	Non	Non	Non	Non	Non	Non	Non	Non	Non	Non	Non
chr11	5757677	5759177	+	NM_001005180	OR56B1	coding gene	Non	Non	Non	Non	Non	Non	Non	Non	Non	Non	Non	Non	Non	Non	Non	Non	Non	Non	Non	Non
chr11	6129008	6130508	+	NM_001005181	OR56B4	coding gene	Non	Non	Non	Non	Non	Non	Non	Non	Non	Non	Non	Non	Non	Non	Non	Non	Non	Non	Non	Non
chr12	55714383	55715883	+	NM_001005182	OR6C1	coding gene	Non	Non	Non	Non	Non	Non	Non	Non	Non	Non	Non	Non	Non	Non	Non	Non	Non	Non	Non	Non
chr12	55820037	55821537	+	NM_001005183	OR6C76	coding gene	Non	Non	Non	Non	Non	Non	Non	Non	Non	Non	Non	Non	Non	Non	Non	Non	Non	Non	Non	Non
chr1	158724605	158726105	+	NM_001005184	OR6K6	coding gene	Non	Non	Non	Non	Non	Non	Non	Non	Non	Non	Non	Non	Non	Non	Non	Non	Non	Non	Non	Non
chr1	158734972	158736472	-	NM_001005185	OR6N1	coding gene	Non	Non	Non	Non	Non	Non	Non	Non	Non	Non	Non	Non	Non	Non	Non	Non	Non	Non	Non	Non
chr11	57798424	57799924	+	NM_001005186	OR6Q1	coding gene	Non	Non	Non	Non	Non	Non	Non	Non	Non	Non	Non	Non	Non	Non	Non	Non	Non	Non	Non	Non
chr11	123813045	123814545	-	NM_001005187	OR6T1	coding gene	Non	Non	Non	Non	Non	Non	Non	Non	Non	Non	Non	Non	Non	Non	Non	Non	Non	Non	Non	Non
chr11	123623726	123625226	-	NM_001005188	OR6X1	coding gene	Non	Non	Non	Non	Non	Non	Non	Non	Non	Non	Non	Non	Non	Non	Non	Non	Non	Non	Non	Non
chr1	158516395	158517895	-	NM_001005189	OR6Y1	coding gene	Non	Non	Non	Non	Non	Non	Non	Non	Non	Non	Non	Non	Non	Non	Non	Non	Non	Non	Non	Non
chr19	14951189	14952689	-	NM_001005190	OR7A10	coding gene	Non	Non	Non	Non	Non	Non	Non	Non	Non	Non	Non	Non	Non	Non	Non	Non	Non	Non	Non	Non
chr19	9324047	9325547	-	NM_001005191	OR7D4	coding gene	Non	Non	Non	Non	Non	Non	Non	Non	Non	Non	Non	Non	Non	Non	Non	Non	Non	Non	Non	Non
chr19	9224939	9226439	-	NM_001005192	OR7G1	coding gene	Non	Non	Non	Non	Non	Non	Non	Non	Non	Non	Non	Non	Non	Non	Non	Non	Non	Non	Non	Non
chr19	9212482	9213982	-	NM_001005193	OR7G2	coding gene	Non	Non	Non	Non	Non	Non	Non	Non	Non	Non	Non	Non	Non	Non	Non	Non	Non	Non	Non	Non
chr11	124439964	124441464	+	NM_001005194	OR8A1	coding gene	Non	Non	Non	Non	Non	Non	Non	Non	Non	Non	Non	Non	Non	Non	Non	Non	Non	Non	Non	Non
chr11	124412050	124413550	-	NM_001005195	OR8B12	coding gene	Non	Non	Non	Non	Non	Non	Non	Non	Non	Non	Non	Non	Non	Non	Non	Non	Non	Non	Non	Non
chr11	124293267	124294767	-	NM_001005196	OR8B4	coding gene	Non	Non	Non	Non	Non	Non	Non	Non	Non	Non	Non	Non	Non	Non	Non	Non	Non	Non	Non	Non
chr11	123777138	123778638	+	NM_001005197	OR8D4	coding gene	Non	Non	Non	Non	Non	Non	Non	Non	Non	Non	Non	Non	Non	Non	Non	Non	Non	Non	Non	Non
chr11	124134722	124136222	+	NM_001005198	OR8G5	coding gene	Non	Non	Non	Non	Non	Non	Non	Non	Non	Non	Non	Non	Non	Non	Non	Non	Non	Non	Non	Non
chr11	56057038	56058538	-	NM_001005199	OR8H1	coding gene	Non	Non	Non	Non	Non	Non	Non	Non	Non	Non	Non	Non	Non	Non	Non	Non	Non	Non	Non	Non
chr11	55872518	55874018	+	NM_001005200	OR8H2	coding gene	Non	Non	Non	Non	Non	Non	Non	Non	Non	Non	Non	Non	Non	Non	Non	Non	Non	Non	Non	Non
chr11	55889848	55891348	+	NM_001005201	OR8H3	coding gene	Non	Non	Non	Non	Non	Non	Non	Non	Non	Non	Non	Non	Non	Non	Non	Non	Non	Non	Non	Non
chr11	56085782	56087282	+	NM_001005202	OR8K3	coding gene	Non	Non	Non	Non	Non	Non	Non	Non	Non	Non	Non	Non	Non	Non	Non	Non	Non	Non	Non	Non
chr12	48919414	48920914	+	NM_001005203	OR8S1	coding gene	Non	Non	Non	Non	Non	Non	Non	Non	Non	Non	Non	Non	Non	Non	Non	Non	Non	Non	Non	Non
chr11	56143099	56144599	+	NM_001005204	OR8U1	coding gene	Non	Non	Non	Non	Non	Non	Non	Non	Non	Non	Non	Non	Non	Non	Non	Non	Non	Non	Non	Non
chr11	56127690	56129190	+	NM_001005205	OR8J1	coding gene	Non	Non	Non	Non	Non	Non	Non	Non	Non	Non	Non	Non	Non	Non	Non	Non	Non	Non	Non	Non
chr17	57182766	57184266	-	NM_001005207	TRIM37	coding gene	Sharp	Sharp	Sharp	Sharp	Sharp	Intermediate	Sharp	Intermediate	Sharp	Sharp	Sharp	Sharp	Sharp	Intermediate	Intermediate	Intermadiate	Intermediate	Intermediate	Intermediate	Broad
chr2	220408744	220410244	+	NM_001005209	TMEM198	coding gene	Intermediate	Intermediate	Intermediate	Intermediate	Sharp	Intermediate	Intermediate	Intermediate	Intermediate	Intermediate	Sharp	Intermediate	Sharp	Intermediate	Intermediate	Sharp	Sharp	Sharp	Intermediate	Sharp
chr11	56949220	56950720	+	NM_001005210	LRRC55	coding gene	Non	Non	Non	Non	Non	Non	Non	Non	Non	Non	Non	Non	Non	Non	Non	Non	Non	Non	Non	Non
chr11	57885416	57886916	-	NM_001005211	OR9I1	coding gene	Non	Non	Non	Non	Non	Non	Non	Non	Non	Non	Non	Non	Non	Non	Non	Non	Non	Non	Non	Non
chr11	57791352	57792852	+	NM_001005212	OR9Q1	coding gene	Non	Non	Non	Non	Non	Non	Non	Non	Non	Non	Non	Non	Non	Non	Non	Non	Non	Non	Non	Non
chr11	56467863	56469363	+	NM_001005213	OR9G1	coding gene	Non	Non	Non	Non	Non	Non	Non	Non	Non	Non	Non	Non	Non	Sharp	Non	Non	Non	Sharp	Non	Non
chr1	165513477	165514977	+	NM_001005214	LRRC52	coding gene	Non	Non	Non	Non	Non	Non	Non	Non	Non	Non	Non	Non	Non	Non	Non	Non	Non	Non	Non	Non
chr6	29079667	29081167	+	NM_001005216_2	None	coding gene	Non	Non	Non	Non	Non	Non	Non	Non	Non	Non	Non	Non	Non	Non	Non	Non	Non	Non	Non	Non
chr4	190946912	190948412	-	NM_001005217	FRG2	coding gene	Non	Non	Non	Non	Non	Non	Non	Non	Non	Non	Non	Non	Non	Non	Non	Non	Non	Non	Non	Non
chr11	58274078	58275578	-	NM_001005218	OR5B21	coding gene	Non	Non	Non	Non	Non	Non	Non	Non	Non	Non	Non	Non	Non	Non	Non	Non	Non	Non	Non	Non
chr1	367658	369158	+	NM_001005221	OR4F29	coding gene	Non	Non	Non	Non	Non	Non	Non	Non	Non	Non	Non	Non	Non	Non	Non	Non	Non	Non	Non	Non
chr1	620534	622034	-	NM_001005221_1	None	coding gene	Non	Non	Non	Non	Non	Non	Non	Non	Non	Non	Non	Non	Non	Non	Non	Non	Non	Non	Non	Non
chr5	180794287	180795787	+	NM_001005221_2	None	coding gene	Non	Non	Non	Non	Non	Non	Non	Non	Non	Non	Non	Non	Non	Non	Non	Non	Non	Non	Non	Non
chr1	367658	369158	+	NM_001005224	OR4F3	coding gene	Non	Non	Non	Non	Non	Non	Non	Non	Non	Non	Non	Non	Non	Non	Non	Non	Non	Non	Non	Non
chr1	620534	622034	-	NM_001005224_1	None	coding gene	Non	Non	Non	Non	Non	Non	Non	Non	Non	Non	Non	Non	Non	Non	Non	Non	Non	Non	Non	Non
chr5	180794287	180795787	+	NM_001005224_2	None	coding gene	Non	Non	Non	Non	Non	Non	Non	Non	Non	Non	Non	Non	Non	Non	Non	Non	Non	Non	Non	Non
chr6	29053590	29055090	-	NM_001005226_1	None	coding gene	Non	Non	Non	Non	Non	Non	Non	Non	Non	Non	Non	Non	Non	Non	Non	Non	Non	Non	Non	Non
chr9	125437408	125438908	+	NM_001005234	OR1L3	coding gene	Non	Non	Non	Non	Non	Non	Non	Non	Non	Non	Non	Non	Non	Non	Non	Non	Non	Non	Non	Non
chr9	125486268	125487768	+	NM_001005235	OR1L4	coding gene	Non	Non	Non	Non	Non	Non	Non	Non	Non	Non	Non	Non	Non	Non	Non	Non	Non	Non	Non	Non
chr9	125423994	125425494	+	NM_001005236	OR1L1	coding gene	Non	Non	Non	Non	Non	Non	Non	Non	Non	Non	Non	Non	Non	Non	Non	Non	Non	Non	Non	Non
chr11	4944069	4945569	-	NM_001005237	OR51G1	coding gene	Non	Non	Non	Non	Non	Non	Non	Non	Non	Non	Non	Non	Non	Non	Non	Non	Non	Non	Non	Non
chr11	4935393	4936893	-	NM_001005238	OR51G2	coding gene	Non	Non	Non	Non	Non	Non	Non	Non	Non	Non	Non	Non	Non	Non	Non	Non	Non	Non	Non	Non
chr22	16448304	16449804	-	NM_001005239	OR11H1	coding gene	Non	Non	Non	Non	Non	Non	Non	Non	Non	Non	Non	Non	Non	Non	Non	Non	Non	Non	Non	Non
chr19	110678	112178	+	NM_001005240	OR4F17	coding gene	Non	Non	Non	Non	Non	Non	Non	Non	Non	Non	Non	Non	Non	Non	Non	Non	Non	Non	Non	Non
chr15	22382472	22383972	+	NM_001005241	OR4N4	coding gene	Non	Non	Non	Non	Non	Non	Non	Non	Non	Non	Non	Non	Non	Non	Non	Non	Non	Non	Non	Non
chr12	33048280	33049780	-	NM_001005242	PKP2	coding gene	Sharp	Sharp	Sharp	Sharp	Non	Non	Sharp	Sharp	Sharp	Sharp	Sharp	Sharp	Non	Non	Non	Non	Non	Sharp	Non	Non
chr12	55523552	55525052	+	NM_001005243	OR9K2	coding gene	Non	Non	Non	Non	Non	Non	Non	Non	Non	Non	Non	Non	Non	Non	Non	Non	Non	Non	Non	Non
chr11	56309233	56310733	-	NM_001005245	OR5M11	coding gene	Non	Non	Non	Non	Non	Non	Non	Non	Non	Non	Non	Non	Non	Non	Non	Non	Non	Non	Non	Non
chr11	50002571	50004071	-	NM_001005270	OR4C12	coding gene	Non	Non	Non	Non	Non	Non	Non	Non	Non	Non	Non	Non	Non	Non	Non	Non	Non	Non	Non	Non
chr17	7788122	7789622	+	NM_001005271	CHD3	coding gene	Broad	Broad	Broad	Broad	Intermediate	Broad	Broad	Broad	Broad	Broad	Broad	Intermediate	Sharp	Intermediate	Broad	Broad	Broad	Broad	Broad	Intermediate
chr11	51410948	51412448	-	NM_001005272	OR4A5	coding gene	Non	Non	Non	Non	Non	Non	Non	Non	Non	Non	Non	Non	Non	Non	Non	Non	Non	Non	Non	Non
chr17	7792168	7793668	+	NM_001005273	CHD3	coding gene	Non	Non	Broad	Non	Sharp	Non	Non	Broad	Non	Non	Non	Non	Non	Intermediate	Broad	Broad	Broad	Broad	Broad	Intermediate
chr11	55110676	55112176	+	NM_001005274	OR4A16	coding gene	Non	Non	Non	Non	Non	Non	Non	Non	Non	Non	Non	Non	Non	Non	Non	Non	Non	Non	Non	Non
chr11	55135359	55136859	+	NM_001005275	OR4A15	coding gene	Non	Non	Non	Non	Non	Non	Non	Non	Non	Non	Non	Non	Non	Non	Non	Non	Non	Non	Non	Non
chr7	99473156	99474656	-	NM_001005276	OR2AE1	coding gene	Non	Non	Non	Non	Non	Non	Non	Non	Non	Non	Non	Non	Non	Non	Non	Non	Non	Non	Non	Non
chr1	367658	369158	+	NM_001005277	OR4F16	coding gene	Non	Non	Non	Non	Non	Non	Non	Non	Non	Non	Non	Non	Non	Non	Non	Non	Non	Non	Non	Non
chr1	620534	622034	-	NM_001005277_1	None	coding gene	Non	Non	Non	Non	Non	Non	Non	Non	Non	Non	Non	Non	Non	Non	Non	Non	Non	Non	Non	Non
chr5	180794287	180795787	+	NM_001005277_2	None	coding gene	Non	Non	Non	Non	Non	Non	Non	Non	Non	Non	Non	Non	Non	Non	Non	Non	Non	Non	Non	Non
chr1	158745925	158747425	-	NM_001005278	OR6N2	coding gene	Non	Non	Non	Non	Non	Non	Non	Non	Non	Non	Non	Non	Non	Non	Non	Non	Non	Non	Non	Non
chr1	158668942	158670442	-	NM_001005279	OR6K2	coding gene	Non	Non	Non	Non	Non	Non	Non	Non	Non	Non	Non	Non	Non	Non	Non	Non	Non	Non	Non	Non
chr12	55614808	55616308	+	NM_001005280	OR10A7	coding gene	Non	Non	Non	Non	Non	Non	Non	Non	Non	Non	Non	Non	Non	Non	Non	Non	Non	Non	Non	Non
chr7	143701089	143702589	+	NM_001005281	OR6B1	coding gene	Non	Non	Non	Non	Non	Non	Non	Non	Non	Non	Non	Non	Non	Non	Non	Non	Non	Non	Non	Non
chr11	56257346	56258846	-	NM_001005282	OR5M8	coding gene	Non	Non	Non	Non	Non	Non	Non	Non	Non	Non	Non	Non	Non	Non	Non	Non	Non	Non	Non	Non
chr11	57957905	57959405	+	NM_001005283	OR9Q2	coding gene	Non	Non	Non	Non	Non	Non	Non	Non	Non	Non	Non	Non	Non	Non	Non	Non	Non	Non	Non	Non
chr11	56509787	56511287	-	NM_001005284	OR9G4	coding gene	Non	Non	Non	Non	Non	Non	Non	Non	Non	Non	Non	Non	Non	Non	Non	Non	Non	Non	Non	Non
chr11	74799258	74800758	-	NM_001005285	OR2AT4	coding gene	Non	Non	Non	Non	Non	Non	Non	Non	Non	Non	Non	Non	Non	Non	Non	Non	Non	Non	Non	Non
chr1	247874557	247876057	-	NM_001005286	OR6F1	coding gene	Non	Non	Non	Non	Non	Non	Non	Non	Non	Non	Non	Non	Non	Non	Non	Non	Non	Non	Non	Non
chr7	143928436	143929936	-	NM_001005287	OR2A1	coding gene	Non	Non	Non	Non	Non	Non	Non	Non	Non	Non	Non	Non	Non	Non	Non	Non	Non	Non	Non	Non
chr7	144015217	144016717	+	NM_001005287_1	None	coding gene	Non	Non	Non	Non	Non	Non	Non	Non	Non	Non	Non	Non	Non	Non	Non	Non	Non	Non	Non	Non
chr11	5461283	5462783	-	NM_001005288	OR51I1	coding gene	Non	Non	Non	Non	Non	Non	Non	Non	Non	Non	Non	Non	Non	Non	Non	Non	Non	Non	Non	Non
chr11	5565253	5566753	-	NM_001005289	OR52H1	coding gene	Non	Non	Non	Non	Non	Non	Non	Non	Non	Non	Non	Non	Non	Non	Non	Non	Non	Non	Non	Non
chr1	109824290	109825790	-	NM_001005290	PSRC1	coding gene	Intermediate	Sharp	Sharp	Sharp	Sharp	Sharp	Sharp	Sharp	Sharp	Sharp	Sharp	Sharp	Sharp	Sharp	Sharp	Intermadiate	Sharp	Sharp	Intermediate	Sharp
chr17	17738825	17740325	-	NM_001005291	SREBF1	coding gene	Sharp	Sharp	Sharp	Intermediate	Sharp	Sharp	Sharp	Sharp	Sharp	Sharp	Sharp	Sharp	Sharp	Sharp	Intermediate	Sharp	Sharp	Broad	Broad	Sharp
chr11	56756388	56757888	+	NM_001005323	OR5AK2	coding gene	Non	Non	Non	Non	Non	Non	Non	Non	Non	Non	Non	Non	Non	Non	Non	Non	Non	Non	Non	Non
chr11	59479818	59481318	-	NM_001005324	OR10V1	coding gene	Non	Non	Non	Non	Non	Non	Non	Non	Non	Non	Non	Non	Non	Non	Non	Non	Non	Non	Non	Non
chr11	123675557	123677057	-	NM_001005325	OR6M1	coding gene	Non	Non	Non	Non	Non	Non	Non	Non	Non	Non	Non	Non	Non	Non	Non	Non	Non	Non	Non	Non
chr15	102345922	102347422	+	NM_001005326	OR4F6	coding gene	Non	Non	Non	Non	Non	Non	Non	Non	Non	Non	Non	Non	Non	Non	Non	Non	Non	Non	Non	Non
chr1	158686405	158687905	-	NM_001005327	OR6K3	coding gene	Non	Non	Non	Non	Non	Non	Non	Non	Non	Non	Non	Non	Non	Non	Non	Non	Non	Non	Non	Non
chr7	143955221	143956721	-	NM_001005328	OR2A7	coding gene	Non	Non	Non	Non	Non	Non	Non	Non	Non	Non	Non	Non	Non	Non	Non	Non	Non	Non	Non	Non
chr11	4966830	4968330	-	NM_001005329	OR51A4	coding gene	Non	Non	Non	Non	Non	Non	Non	Non	Non	Non	Non	Non	Non	Non	Non	Non	Non	Non	Non	Non
chrX	51546154	51547654	+	NM_001005332	MAGED1	coding gene	Sharp	Sharp	Sharp	Sharp	Sharp	Sharp	Sharp	Sharp	Sharp	Sharp	Sharp	Sharp	Non	Sharp	Sharp	Sharp	Sharp	Non	Sharp	Sharp
chrX	51636697	51638197	+	NM_001005333	MAGED1	coding gene	Intermediate	Sharp	Sharp	Intermediate	Sharp	Intermediate	Intermediate	Intermediate	Intermediate	Intermediate	Intermediate	Intermediate	Sharp	Intermediate	Intermediate	Broad	Intermediate	Intermediate	Intermediate	Intermediate
chr19	39341479	39342979	-	NM_001005335	HNRNPL	coding gene	Broad	Broad	Broad	Broad	Intermediate	Broad	Broad	Broad	Broad	Broad	Broad	Broad	Sharp	Broad	Broad	Broad	Broad	Broad	Broad	Broad
chr9	130965662	130967162	+	NM_001005336	DNM1	coding gene	Sharp	Sharp	Sharp	Sharp	Sharp	Sharp	Sharp	Sharp	Sharp	Sharp	Sharp	Sharp	Sharp	Sharp	Sharp	Sharp	Sharp	Sharp	Sharp	Sharp
chr1	201252579	201254079	+	NM_001005337	PKP1	coding gene	Non	Non	Sharp	Sharp	Non	Broad	Sharp	Non	Non	Sharp	Non	Sharp	Non	Non	Non	Non	Sharp	Non	Sharp	Non
chr3	97851541	97853041	+	NM_001005338	OR5H1	coding gene	Non	Non	Non	Non	Non	Non	Non	Non	Non	Non	Non	Non	Non	Non	Non	Non	Non	Non	Non	Non
chr10	121300722	121302222	-	NM_001005339	RGS10	coding gene	Broad	Broad	Broad	Broad	Sharp	Intermediate	Intermediate	Sharp	Broad	Broad	Intermediate	Broad	Sharp	Intermediate	Sharp	Sharp	Broad	Intermediate	Intermediate	Broad
chr7	23286315	23287815	+	NM_001005340	GPNMB	coding gene	Non	Non	Non	Non	Non	Non	Sharp	Non	Sharp	Sharp	Non	Non	Non	Non	Sharp	Non	Non	Non	Non	Non
chr1	65613512	65615012	+	NM_001005353	AK4	coding gene	Sharp	Sharp	Sharp	Sharp	Sharp	Sharp	Sharp	Intermediate	Sharp	Sharp	Sharp	Sharp	Sharp	Non	Sharp	Broad	Sharp	Sharp	Sharp	Non
chr12	53835432	53836932	+	NM_001005354	PRR13	coding gene	Sharp	Intermediate	Sharp	Sharp	Sharp	Sharp	Intermediate	Sharp	Sharp	Sharp	Sharp	Sharp	Sharp	Sharp	Sharp	Intermadiate	Sharp	Sharp	Intermediate	Sharp
chr14	19553364	19554864	+	NM_001005356	POTEG	coding gene	Non	Non	Non	Non	Non	Non	Non	Non	Non	Non	Non	Non	Non	Non	Non	Non	Non	Non	Non	Non
chr19	10828728	10830228	+	NM_001005360	DNM2	coding gene	Intermediate	Intermediate	Intermediate	Intermediate	Sharp	Sharp	Intermediate	Intermediate	Sharp	Intermediate	Sharp	Sharp	Sharp	Sharp	Sharp	Intermadiate	Sharp	Sharp	Intermediate	Sharp
chr19	10828728	10830228	+	NM_001005361	DNM2	coding gene	Intermediate	Intermediate	Intermediate	Intermediate	Sharp	Sharp	Intermediate	Intermediate	Sharp	Intermediate	Sharp	Sharp	Sharp	Sharp	Sharp	Intermadiate	Sharp	Sharp	Intermediate	Sharp
chr19	10828728	10830228	+	NM_001005362	DNM2	coding gene	Intermediate	Intermediate	Intermediate	Intermediate	Sharp	Sharp	Intermediate	Intermediate	Sharp	Intermediate	Sharp	Sharp	Sharp	Sharp	Sharp	Intermadiate	Sharp	Sharp	Intermediate	Sharp
chr8	43147584	43149084	+	NM_001005365	POTEA	coding gene	Non	Non	Non	Non	Non	Non	Non	Non	Non	Non	Non	Non	Non	Non	Non	Non	Non	Non	Non	Non
chr12	122016864	122018364	-	NM_001005366	KDM2B	coding gene	Broad	Intermediate	Intermediate	Intermediate	Intermediate	Broad	Intermediate	Broad	Intermediate	Broad	Broad	Intermediate	Intermediate	Broad	Intermediate	Broad	Intermediate	Broad	Broad	Intermediate
chr19	54926604	54928104	+	NM_001005367	TTYH1	coding gene	Non	Non	Non	Sharp	Sharp	Non	Sharp	Non	Sharp	Sharp	Non	Sharp	Non	Non	Sharp	Sharp	Non	Sharp	Sharp	Non
chr10	44142652	44144152	-	NM_001005368	ZNF32	coding gene	Sharp	Sharp	Sharp	Sharp	Sharp	Sharp	Sharp	Sharp	Sharp	Sharp	Sharp	Sharp	Sharp	Sharp	Sharp	Sharp	Sharp	Sharp	Sharp	Sharp
chr2	55494815	55496315	-	NM_001005369	MTIF2	coding gene	Sharp	Sharp	Sharp	Sharp	Sharp	Sharp	Sharp	Sharp	Sharp	Sharp	Sharp	Sharp	Sharp	Sharp	Sharp	Sharp	Sharp	Sharp	Sharp	Sharp
chr9	130213764	130215264	+	NM_001005373	LRSAM1	coding gene	Intermediate	Intermediate	Intermediate	Intermediate	Intermediate	Intermediate	Intermediate	Broad	Intermediate	Intermediate	Sharp	Intermediate	Sharp	Intermediate	Intermediate	Intermadiate	Intermediate	Intermediate	Intermediate	Intermediate
chr9	130214533	130216033	+	NM_001005374	LRSAM1	coding gene	Intermediate	Intermediate	Intermediate	Intermediate	Intermediate	Intermediate	Intermediate	Broad	Intermediate	Intermediate	Sharp	Intermediate	Non	Intermediate	Intermediate	Intermadiate	Intermediate	Intermediate	Intermediate	Intermediate
chrY	25343754	25345254	-	NM_001005375	None	coding gene	Non	Non	Non	Non	Non	Non	Non	Non	Non	Non	Non	Non	Non	Non	Non	Non	Non	Non	Non	Non
chrY	26979966	26981466	+	NM_001005375_1	None	coding gene	Non	Non	Non	Non	Non	Non	Non	Non	Non	Non	Non	Non	Non	Non	Non	Non	Non	Non	Non	Non
chr19	44172998	44174498	-	NM_001005376	PLAUR	coding gene	Sharp	Sharp	Sharp	Sharp	Sharp	Non	Intermediate	Intermediate	Sharp	Intermediate	Intermediate	Intermediate	Non	Sharp	Intermediate	Sharp	Sharp	Intermediate	Intermediate	Sharp
chr19	44172998	44174498	-	NM_001005377	PLAUR	coding gene	Sharp	Sharp	Sharp	Sharp	Sharp	Non	Intermediate	Intermediate	Sharp	Intermediate	Intermediate	Intermediate	Non	Sharp	Intermediate	Sharp	Sharp	Intermediate	Intermediate	Sharp
chr2	65454828	65456328	+	NM_001005386	ACTR2	coding gene	Sharp	Intermediate	Intermediate	Sharp	Sharp	Intermediate	Intermediate	Intermediate	Intermediate	Intermediate	Intermediate	Sharp	Sharp	Intermediate	Intermediate	Broad	Sharp	Intermediate	Intermediate	Intermediate
chr1	204797781	204799281	+	NM_001005388	NFASC	coding gene	Non	Non	Sharp	Sharp	Non	Non	Sharp	Non	Non	Sharp	Non	Sharp	Non	Non	Sharp	Non	Non	Non	Non	Non
chr1	204797781	204799281	+	NM_001005389	NFASC	coding gene	Non	Non	Sharp	Sharp	Non	Non	Sharp	Non	Non	Sharp	Non	Sharp	Non	Non	Sharp	Non	Non	Non	Non	Non
chr17	57409052	57410552	+	NM_001005404	YPEL2	coding gene	Sharp	Sharp	Intermediate	Sharp	Sharp	Sharp	Intermediate	Sharp	Sharp	Intermediate	Sharp	Sharp	Sharp	Sharp	Sharp	Sharp	Sharp	Sharp	Sharp	Sharp
chr11	71292421	71293921	-	NM_001005405	KRTAP5-11	coding gene	Non	Non	Non	Non	Non	Non	Non	Non	Non	Non	Non	Non	Non	Non	Non	Non	Non	Non	Non	Non
chr16	1203240	1204740	+	NM_001005407	CACNA1H	coding gene	Non	Sharp	Sharp	Sharp	Non	Non	Sharp	Non	Non	Sharp	Non	Sharp	Non	Non	Non	Non	Non	Non	Non	Non
chr17	7231138	7232638	-	NM_001005408	NEURL4	coding gene	Sharp	Sharp	Sharp	Sharp	Sharp	Sharp	Sharp	Sharp	Sharp	Sharp	Sharp	Sharp	Sharp	Sharp	Intermediate	Sharp	Sharp	Sharp	Intermediate	Sharp
chr22	30751413	30752913	-	NM_001005409	None	coding gene	Sharp	Sharp	Sharp	Sharp	Sharp	Intermediate	Sharp	Intermediate	Sharp	Sharp	Sharp	Sharp	Sharp	Intermediate	Sharp	Intermadiate	Sharp	Sharp	Intermediate	Sharp
chr10	58119534	58121034	-	NM_001005413	ZWINT	coding gene	Intermediate	Sharp	Sharp	Sharp	Sharp	Intermediate	Sharp	Sharp	Sharp	Sharp	Sharp	Sharp	Sharp	Broad	Intermediate	Broad	Sharp	Sharp	Intermediate	Sharp
chr19	8478186	8479686	+	NM_001005415	MARCHF2	coding gene	Sharp	Sharp	Sharp	Sharp	Sharp	Sharp	Sharp	Sharp	Sharp	Sharp	Sharp	Sharp	Sharp	Sharp	Sharp	Sharp	Sharp	Sharp	Sharp	Sharp
chr19	8478186	8479686	+	NM_001005416	MARCHF2	coding gene	Sharp	Sharp	Sharp	Sharp	Sharp	Sharp	Sharp	Sharp	Sharp	Sharp	Sharp	Sharp	Sharp	Sharp	Sharp	Sharp	Sharp	Sharp	Sharp	Sharp
chr1	44446176	44447676	+	NM_001005417	B4GALT2	coding gene	Non	Non	Non	Non	Non	Non	Non	Non	Non	Non	Non	Non	Non	Broad	Sharp	Broad	Non	Non	Intermediate	Non
chr10	131760591	131762091	-	NM_001005463	EBF3	coding gene	Sharp	Sharp	Sharp	Sharp	Non	Non	Sharp	Non	Sharp	Sharp	Sharp	Sharp	Sharp	Non	Sharp	Non	Non	Intermediate	Intermediate	Non
chr1	149811265	149812765	-	NM_001005464	H3C15	coding gene	Broad	Broad	Broad	Broad	Intermediate	Broad	Broad	Broad	Broad	Broad	Broad	Broad	Broad	Non	Non	Non	Broad	Broad	Broad	Broad
chr1	149824180	149825680	+	NM_001005464_1	None	coding gene	Broad	Broad	Broad	Broad	Intermediate	Broad	Broad	Broad	Broad	Broad	Broad	Broad	Broad	Non	Non	Non	Broad	Broad	Broad	Broad
chr14	22037375	22038875	-	NM_001005465	OR10G3	coding gene	Non	Non	Non	Non	Non	Non	Non	Non	Non	Non	Non	Non	Non	Non	Non	Non	Non	Non	Non	Non
chr14	22101498	22102998	-	NM_001005466	OR10G2	coding gene	Non	Non	Non	Non	Non	Non	Non	Non	Non	Non	Non	Non	Non	Non	Non	Non	Non	Non	Non	Non
chr11	124265747	124267247	-	NM_001005467	OR8B3	coding gene	Non	Non	Non	Non	Non	Non	Non	Non	Non	Non	Non	Non	Non	Non	Non	Non	Non	Non	Non	Non
chr11	124251739	124253239	-	NM_001005468	OR8B2	coding gene	Non	Non	Non	Non	Non	Non	Non	Non	Non	Non	Non	Non	Non	Non	Non	Non	Non	Non	Non	Non
chr11	58169382	58170882	-	NM_001005469	OR5B3	coding gene	Non	Non	Non	Non	Non	Non	Non	Non	Non	Non	Non	Non	Non	Non	Non	Non	Non	Non	Non	Non
chr11	48238361	48239861	+	NM_001005470	OR4B1	coding gene	Non	Non	Non	Non	Non	Non	Non	Non	Non	Non	Non	Non	Non	Non	Non	Non	Non	Non	Non	Non
chr1	248550909	248552409	+	NM_001005471	OR2T6	coding gene	Non	Non	Non	Non	Non	Non	Non	Non	Non	Non	Non	Non	Non	Non	Non	Non	Non	Non	Non	Non
chr5	41509230	41510730	-	NM_001005473	PLCXD3	coding gene	Non	Non	Non	Non	Non	Non	Non	Non	Non	Non	Non	Non	Non	Non	Non	Non	Non	Non	Non	Non
chr3	101546833	101548333	+	NM_001005474	NFKBIZ	coding gene	Sharp	Sharp	Sharp	Sharp	Sharp	Sharp	Sharp	Intermediate	Sharp	Sharp	Sharp	Sharp	Sharp	Sharp	Non	Intermadiate	Non	Sharp	Sharp	Non
chr2	159313475	159314975	+	NM_001005476	PKP4	coding gene	Intermediate	Sharp	Sharp	Sharp	Sharp	Non	Sharp	Sharp	Sharp	Sharp	Sharp	Sharp	Sharp	Intermediate	Intermediate	Broad	Sharp	Sharp	Intermediate	Sharp
chr3	97983128	97984628	+	NM_001005479	OR5H6	coding gene	Non	Non	Non	Non	Non	Non	Non	Non	Non	Non	Non	Non	Non	Non	Non	Non	Non	Non	Non	Non
chr7	143806675	143808175	+	NM_001005480	OR2A2	coding gene	Non	Non	Non	Non	Non	Non	Non	Non	Non	Non	Non	Non	Non	Non	Non	Non	Non	Non	Non	Non
chr3	98001731	98003231	+	NM_001005482	OR5H2	coding gene	Non	Non	Non	Non	Non	Non	Non	Non	Non	Non	Non	Non	Non	Non	Non	Non	Non	Non	Non	Non
chr14	20388765	20390265	+	NM_001005483	OR4K5	coding gene	Non	Non	Non	Non	Non	Non	Non	Non	Non	Non	Non	Non	Non	Non	Non	Non	Non	Non	Non	Non
chr1	69090	70590	+	NM_001005484	OR4F5	coding gene	Non	Non	Non	Non	Non	Non	Non	Non	Non	Non	Non	Non	Non	Non	Non	Non	Non	Non	Non	Non
chr14	20443677	20445177	+	NM_001005486	OR4K15	coding gene	Non	Non	Non	Non	Non	Non	Non	Non	Non	Non	Non	Non	Non	Non	Non	Non	Non	Non	Non	Non
chr1	247834843	247836343	-	NM_001005487	OR13G1	coding gene	Non	Non	Non	Non	Non	Non	Non	Non	Non	Non	Non	Non	Non	Non	Non	Non	Non	Non	Non	Non
chr11	58125042	58126542	-	NM_001005489	OR5B17	coding gene	Non	Non	Non	Non	Non	Non	Non	Non	Non	Non	Non	Non	Non	Non	Non	Non	Non	Non	Non	Non
chr12	55641071	55642571	+	NM_001005490	OR6C74	coding gene	Non	Non	Non	Non	Non	Non	Non	Non	Non	Non	Non	Non	Non	Non	Non	Non	Non	Non	Non	Non
chr11	55734439	55735939	-	NM_001005491	OR10AG1	coding gene	Non	Non	Non	Non	Non	Non	Non	Non	Non	Non	Non	Non	Non	Non	Non	Non	Non	Non	Non	Non
chr11	55944093	55945593	+	NM_001005492	OR5J2	coding gene	Non	Non	Non	Non	Non	Non	Non	Non	Non	Non	Non	Non	Non	Non	Non	Non	Non	Non	Non	Non
chr12	55687516	55689016	-	NM_001005493	OR6C6	coding gene	Non	Non	Non	Non	Non	Non	Non	Non	Non	Non	Non	Non	Non	Non	Non	Non	Non	Non	Non	Non
chr12	55945010	55946510	+	NM_001005494	OR6C4	coding gene	Non	Non	Non	Non	Non	Non	Non	Non	Non	Non	Non	Non	Non	Non	Non	Non	Non	Non	Non	Non
chr1	248636651	248638151	+	NM_001005495	OR2T3	coding gene	Non	Non	Non	Non	Non	Non	Non	Non	Non	Non	Non	Non	Non	Non	Non	Non	Non	Non	Non	Non
chr11	55606227	55607727	+	NM_001005496	OR5D16	coding gene	Non	Non	Non	Non	Non	Non	Non	Non	Non	Non	Non	Non	Non	Non	Non	Non	Non	Non	Non	Non
chr12	55758894	55760394	+	NM_001005497	OR6C75	coding gene	Non	Non	Non	Non	Non	Non	Non	Non	Non	Non	Non	Non	Non	Non	Non	Non	Non	Non	Non	Non
chr17	74482491	74483991	-	NM_001005498	RHBDF2	coding gene	Non	Non	Non	Non	Non	Non	Non	Non	Non	Non	Non	Non	Non	Non	Non	Non	Non	Non	Non	Non
chr12	55862422	55863922	-	NM_001005499	OR6C70	coding gene	Non	Non	Non	Non	Non	Non	Non	Non	Non	Non	Non	Non	Non	Non	Non	Non	Non	Non	Non	Non
chr14	20248481	20249981	+	NM_001005500	OR4M1	coding gene	Non	Non	Non	Non	Non	Non	Non	Non	Non	Non	Non	Non	Non	Non	Non	Non	Non	Non	Non	Non
chr14	20344426	20345926	+	NM_001005501	OR4K2	coding gene	Non	Non	Non	Non	Non	Non	Non	Non	Non	Non	Non	Non	Non	Non	Non	Non	Non	Non	Non	Non
chr12	69325479	69326979	-	NM_001005502	CPM	coding gene	Sharp	Sharp	Sharp	Sharp	Non	Non	Sharp	Sharp	Sharp	Sharp	Sharp	Sharp	Sharp	Non	Sharp	Non	Non	Non	Non	Non
chr14	20665494	20666994	+	NM_001005503	OR11G2	coding gene	Non	Non	Non	Non	Non	Non	Non	Non	Non	Non	Non	Non	Non	Non	Non	Non	Non	Non	Non	Non
chr8	115524	117024	-	NM_001005504	OR4F21	coding gene	Non	Non	Non	Non	Non	Non	Non	Non	Non	Non	Non	Non	Non	Non	Non	Non	Non	Non	Non	Non
chr3	50539392	50540892	-	NM_001005505	CACNA2D2	coding gene	Sharp	Sharp	Sharp	Sharp	Sharp	Sharp	Sharp	Sharp	Sharp	Sharp	Sharp	Sharp	Sharp	Non	Sharp	Non	Non	Sharp	Sharp	Non
chr11	48510344	48511844	+	NM_001005512	OR4A47	coding gene	Non	Non	Non	Non	Non	Non	Non	Non	Non	Non	Non	Non	Non	Non	Non	Non	Non	Non	Non	Non
chr11	48372499	48373999	-	NM_001005513	OR4C45	coding gene	Non	Non	Non	Non	Non	Non	Non	Non	Non	Non	Non	Non	Non	Non	Non	Non	Non	Non	Non	Non
chr3	97868229	97869729	+	NM_001005514	OR5H14	coding gene	Non	Non	Non	Non	Non	Non	Non	Non	Non	Non	Non	Non	Non	Non	Non	Non	Non	Non	Non	Non
chr3	97887543	97889043	+	NM_001005515	OR5H15	coding gene	Non	Non	Non	Non	Non	Non	Non	Non	Non	Non	Non	Non	Non	Non	Non	Non	Non	Non	Non	Non
chr3	98109509	98111009	+	NM_001005516	OR5K3	coding gene	Non	Non	Non	Non	Non	Non	Non	Non	Non	Non	Non	Non	Non	Non	Non	Non	Non	Non	Non	Non
chr3	98072697	98074197	+	NM_001005517	OR5K4	coding gene	Non	Non	Non	Non	Non	Non	Non	Non	Non	Non	Non	Non	Non	Non	Non	Non	Non	Non	Non	Non
chr12	55794312	55795812	+	NM_001005518	OR6C65	coding gene	Non	Non	Non	Non	Non	Non	Non	Non	Non	Non	Non	Non	Non	Non	Non	Non	Non	Non	Non	Non
chr12	55886161	55887661	+	NM_001005519	OR6C68	coding gene	Non	Non	Non	Non	Non	Non	Non	Non	Non	Non	Non	Non	Non	Non	Non	Non	Non	Non	Non	Non
chr1	248084319	248085819	+	NM_001005522	OR2T8	coding gene	Non	Non	Non	Non	Non	Non	Non	Non	Non	Non	Non	Non	Non	Non	Non	Non	Non	Non	Non	Non
chr2	198298271	198299771	-	NM_001005526	SF3B1	coding gene	Intermediate	Intermediate	Broad	Intermediate	Sharp	Broad	Broad	Broad	Intermediate	Broad	Intermediate	Broad	Sharp	Broad	Intermediate	Broad	Intermediate	Intermediate	Intermediate	Intermediate
chr3	68980261	68981761	-	NM_001005527	TAFA4	coding gene	Non	Non	Non	Non	Non	Non	Non	Non	Non	Non	Non	Non	Non	Non	Non	Non	Non	Non	Non	Non
chr11	58189286	58190786	-	NM_001005566	OR5B2	coding gene	Non	Non	Non	Non	Non	Non	Non	Non	Non	Non	Non	Non	Non	Non	Non	Non	Non	Non	Non	Non
chr11	5525382	5526882	-	NM_001005567	OR51B5	coding gene	Non	Non	Non	Non	Non	Non	Non	Non	Non	Non	Non	Non	Non	Non	Non	Non	Non	Non	Non	Non
chrX	68835910	68837410	+	NM_001005609	EDA	coding gene	Non	Non	Non	Non	Non	Non	Sharp	Non	Sharp	Sharp	Sharp	Sharp	Non	Non	Sharp	Non	Non	Sharp	Sharp	Non
chrX	68835910	68837410	+	NM_001005610	EDA	coding gene	Non	Non	Non	Non	Non	Non	Sharp	Non	Sharp	Sharp	Sharp	Sharp	Non	Non	Sharp	Non	Non	Sharp	Sharp	Non
chrX	68835910	68837410	+	NM_001005612	EDA	coding gene	Non	Non	Non	Non	Non	Non	Sharp	Non	Sharp	Sharp	Sharp	Sharp	Non	Non	Sharp	Non	Non	Sharp	Sharp	Non
chrX	68835910	68837410	+	NM_001005613	EDA	coding gene	Non	Non	Non	Non	Non	Non	Sharp	Non	Sharp	Sharp	Sharp	Sharp	Non	Non	Sharp	Non	Non	Sharp	Sharp	Non
chr17	73720775	73722275	+	NM_001005619	ITGB4	coding gene	Non	Non	Non	Non	Non	Non	Non	Non	Non	Non	Non	Non	Non	Non	Non	Non	Non	Non	Non	Non
chr17	73717515	73719015	+	NM_001005731	ITGB4	coding gene	Sharp	Sharp	Sharp	Sharp	Sharp	Sharp	Sharp	Sharp	Sharp	Sharp	Sharp	Sharp	Non	Non	Sharp	Non	Sharp	Sharp	Sharp	Sharp
chr22	29136322	29137822	-	NM_001005735	CHEK2	coding gene	Sharp	Sharp	Sharp	Sharp	Sharp	Sharp	Sharp	Sharp	Sharp	Sharp	Sharp	Sharp	Non	Intermediate	Intermediate	Intermadiate	Sharp	Sharp	Intermediate	Sharp
chr19	52264452	52265952	+	NM_001005738	FPR2	coding gene	Non	Non	Non	Non	Non	Non	Sharp	Non	Sharp	Sharp	Non	Non	Non	Non	Non	Non	Non	Non	Non	Non
chr2	64244714	64246214	-	NM_001005739	VPS54	coding gene	Sharp	Sharp	Sharp	Sharp	Sharp	Sharp	Sharp	Intermediate	Sharp	Intermediate	Sharp	Sharp	Sharp	Sharp	Sharp	Sharp	Sharp	Sharp	Intermediate	Sharp
chr1	155213153	155214653	-	NM_001005741	GBA	coding gene	Sharp	Sharp	Sharp	Sharp	Sharp	Sharp	Sharp	Sharp	Sharp	Sharp	Sharp	Sharp	Sharp	Broad	Sharp	Intermadiate	Broad	Sharp	Intermediate	Sharp
chr1	155213153	155214653	-	NM_001005742	GBA	coding gene	Sharp	Sharp	Sharp	Sharp	Sharp	Sharp	Sharp	Sharp	Sharp	Sharp	Sharp	Sharp	Sharp	Broad	Sharp	Intermadiate	Broad	Sharp	Intermediate	Sharp
chr14	73923786	73925286	-	NM_001005743	NUMB	coding gene	Sharp	Sharp	Sharp	Sharp	Sharp	Intermediate	Sharp	Intermediate	Sharp	Sharp	Sharp	Sharp	Sharp	Intermediate	Sharp	Intermadiate	Sharp	Sharp	Intermediate	Intermediate
chr14	73923786	73925286	-	NM_001005744	NUMB	coding gene	Sharp	Sharp	Sharp	Sharp	Sharp	Intermediate	Sharp	Intermediate	Sharp	Sharp	Sharp	Sharp	Sharp	Intermediate	Sharp	Intermadiate	Sharp	Sharp	Intermediate	Intermediate
chr14	73923786	73925286	-	NM_001005745	NUMB	coding gene	Sharp	Sharp	Sharp	Sharp	Sharp	Intermediate	Sharp	Intermediate	Sharp	Sharp	Sharp	Sharp	Sharp	Intermediate	Sharp	Intermadiate	Sharp	Sharp	Intermediate	Intermediate
chr2	152953735	152955235	-	NM_001005746	CACNB4	coding gene	Non	Non	Sharp	Sharp	Sharp	Non	Sharp	Non	Sharp	Sharp	Sharp	Sharp	Non	Non	Sharp	Sharp	Sharp	Sharp	Sharp	Non
chr2	152828985	152830485	-	NM_001005747	CACNB4	coding gene	Non	Non	Non	Non	Non	Non	Non	Non	Non	Sharp	Non	Non	Non	Non	Non	Sharp	Non	Non	Non	Non
chr10	51827683	51829183	+	NM_001005751	WASHC2A	coding gene	Sharp	Sharp	Sharp	Sharp	Sharp	Sharp	Sharp	Sharp	Sharp	Sharp	Sharp	Sharp	Sharp	Sharp	Sharp	Sharp	Sharp	Sharp	Sharp	Sharp
chr1	35247910	35249410	+	NM_001005752	GJB3	coding gene	Non	Non	Non	Non	Non	Non	Non	Non	Non	Non	Non	Non	Non	Non	Non	Non	Non	Non	Non	Non
chr2	86789120	86790620	-	NM_001005753	CHMP3	coding gene	Sharp	Sharp	Intermediate	Sharp	Sharp	Sharp	Sharp	Sharp	Sharp	Sharp	Sharp	Sharp	Sharp	Sharp	Sharp	Sharp	Sharp	Sharp	Sharp	Sharp
chr2	203101822	203103322	-	NM_001005781	SUMO1	coding gene	Sharp	Sharp	Sharp	Sharp	Sharp	Intermediate	Sharp	Sharp	Sharp	Sharp	Sharp	Intermediate	Sharp	Sharp	Sharp	Broad	Sharp	Sharp	Intermediate	Sharp
chr2	203101822	203103322	-	NM_001005782	SUMO1	coding gene	Sharp	Sharp	Sharp	Sharp	Sharp	Intermediate	Sharp	Sharp	Sharp	Sharp	Sharp	Intermediate	Sharp	Sharp	Sharp	Broad	Sharp	Sharp	Intermediate	Sharp
chr1	119911401	119912901	+	NM_001005783	HAO2	coding gene	Non	Non	Non	Non	Non	Non	Non	Non	Non	Non	Non	Non	Non	Non	Non	Non	Non	Non	Non	Non
chrY	25365603	25367103	+	NM_001005785	DAZ2	coding gene	Non	Non	Non	Non	Non	Non	Non	Non	Non	Non	Non	Non	Non	Non	Non	Non	Non	Non	Non	Non
chrY	26979989	26981489	+	NM_001005785_1	None	coding gene	Non	Non	Non	Non	Non	Non	Non	Non	Non	Non	Non	Non	Non	Non	Non	Non	Non	Non	Non	Non
chrY	26979989	26981489	+	NM_001005786	DAZ2	coding gene	Non	Non	Non	Non	Non	Non	Non	Non	Non	Non	Non	Non	Non	Non	Non	Non	Non	Non	Non	Non
chrY	25365603	25367103	+	NM_001005786_1	None	coding gene	Non	Non	Non	Non	Non	Non	Non	Non	Non	Non	Non	Non	Non	Non	Non	Non	Non	Non	Non	Non
chr17	73177598	73179098	-	NM_001005849	SUMO2	coding gene	Intermediate	Sharp	Intermediate	Sharp	Sharp	Intermediate	Intermediate	Intermediate	Intermediate	Intermediate	Intermediate	Intermediate	Sharp	Intermediate	Intermediate	Broad	Sharp	Intermediate	Intermediate	Intermediate
chr19	57181623	57183123	-	NM_001005850	ZNF835	coding gene	Sharp	Sharp	Sharp	Sharp	Non	Non	Sharp	Non	Sharp	Sharp	Non	Non	Non	Non	Non	Non	Non	Non	Non	Non
chr19	40560615	40562115	-	NM_001005851	ZNF780B	coding gene	Sharp	Sharp	Sharp	Sharp	Sharp	Intermediate	Sharp	Sharp	Sharp	Sharp	Sharp	Sharp	Sharp	Sharp	Sharp	Broad	Sharp	Sharp	Sharp	Sharp
chr2	240968346	240969846	-	NM_001005853	OR6B2	coding gene	Non	Non	Non	Non	Non	Non	Non	Non	Non	Non	Non	Non	Non	Non	Non	Non	Non	Non	Non	Non
chr1	154298035	154299535	+	NM_001005855	ATP8B2	coding gene	Broad	Broad	Sharp	Broad	Sharp	Broad	Broad	Broad	Broad	Broad	Broad	Broad	Sharp	Broad	Broad	Broad	Broad	Broad	Broad	Intermediate
chr3	133968086	133969586	-	NM_001005861	RYK	coding gene	Sharp	Sharp	Sharp	Sharp	Sharp	Intermediate	Sharp	Intermediate	Sharp	Sharp	Sharp	Sharp	Sharp	Sharp	Sharp	Broad	Sharp	Sharp	Intermediate	Sharp
chr17	37844392	37845892	+	NM_001005862	ERBB2	coding gene	Sharp	Sharp	Sharp	Sharp	Sharp	Sharp	Sharp	Sharp	Sharp	Sharp	Sharp	Sharp	Sharp	Sharp	Sharp	Sharp	Sharp	Sharp	Non	Sharp
chr3	48753211	48754711	-	NM_001005909	IP6K2	coding gene	Sharp	Intermediate	Intermediate	Sharp	Sharp	Intermediate	Sharp	Intermediate	Sharp	Intermediate	Sharp	Sharp	Sharp	Sharp	Sharp	Broad	Sharp	Intermediate	Intermediate	Sharp
chr3	48753211	48754711	-	NM_001005910	IP6K2	coding gene	Sharp	Intermediate	Intermediate	Sharp	Sharp	Intermediate	Sharp	Intermediate	Sharp	Intermediate	Sharp	Sharp	Sharp	Sharp	Sharp	Broad	Sharp	Intermediate	Intermediate	Sharp
chr3	48753211	48754711	-	NM_001005911	IP6K2	coding gene	Sharp	Intermediate	Intermediate	Sharp	Sharp	Intermediate	Sharp	Intermediate	Sharp	Intermediate	Sharp	Sharp	Sharp	Sharp	Sharp	Broad	Sharp	Intermediate	Intermediate	Sharp
chr3	50305039	50306539	+	NM_001005914	SEMA3B	coding gene	Non	Non	Non	Non	Non	Non	Non	Non	Non	Non	Non	Non	Non	Non	Non	Non	Non	Non	Non	Non
chr12	56473891	56475391	+	NM_001005915	ERBB3	coding gene	Sharp	Sharp	Sharp	Sharp	Sharp	Sharp	Sharp	Sharp	Sharp	Sharp	Sharp	Sharp	Sharp	Sharp	Sharp	Sharp	Sharp	Sharp	Sharp	Non
chr13	52584130	52585630	-	NM_001005918	ATP7B	coding gene	Sharp	Sharp	Sharp	Sharp	Sharp	Intermediate	Sharp	Sharp	Sharp	Sharp	Sharp	Intermediate	Sharp	Intermediate	Intermediate	Intermadiate	Sharp	Sharp	Intermediate	Intermediate
chr16	732939	734439	-	NM_001005920	JMJD8	coding gene	Sharp	Sharp	Sharp	Sharp	Sharp	Sharp	Sharp	Sharp	Sharp	Sharp	Sharp	Sharp	Sharp	Broad	Sharp	Non	Sharp	Sharp	Broad	Sharp
chr11	1605013	1606513	-	NM_001005922	KRTAP5-1	coding gene	Non	Non	Non	Non	Non	Non	Non	Non	Non	Non	Non	Non	Non	Non	Non	Non	Non	Non	Non	Non
chr4	152020753	152022253	+	NM_001006	RPS3A	coding gene	Sharp	Sharp	Intermediate	Intermediate	Sharp	Intermediate	Intermediate	Intermediate	Intermediate	Intermediate	Intermediate	Intermediate	Sharp	Intermediate	Intermediate	Broad	Sharp	Intermediate	Intermediate	Intermediate
chr3	128997816	128999316	+	NM_001006109	HMCES	coding gene	Sharp	Sharp	Sharp	Sharp	Sharp	Sharp	Sharp	Sharp	Sharp	Sharp	Intermediate	Sharp	Sharp	Sharp	Sharp	Sharp	Sharp	Sharp	Sharp	Sharp
chr21	47706266	47707766	+	NM_001006114	YBEY	coding gene	Sharp	Sharp	Sharp	Sharp	Sharp	Intermediate	Sharp	Intermediate	Sharp	Sharp	Sharp	Broad	Sharp	Broad	Intermediate	Broad	Sharp	Sharp	Broad	Intermediate
chr3	49822473	49823973	-	NM_001006115	IP6K1	coding gene	Sharp	Sharp	Sharp	Sharp	Sharp	Sharp	Sharp	Sharp	Sharp	Sharp	Sharp	Sharp	Sharp	Sharp	Sharp	Sharp	Sharp	Sharp	Intermediate	Sharp
chrY	24327589	24329089	-	NM_001006117	None	coding gene	Non	Non	Non	Non	Non	Non	Non	Non	Non	Non	Non	Non	Non	Non	Non	Non	Non	Non	Non	Non
chrY	24549622	24551122	+	NM_001006117_1	None	coding gene	Non	Non	Non	Non	Non	Non	Non	Non	Non	Non	Non	Non	Non	Non	Non	Non	Non	Non	Non	Non
chrY	23673263	23674763	+	NM_001006118	RBMY1E	coding gene	Non	Non	Non	Non	Non	Non	Non	Non	Non	Non	Non	Non	Non	Non	Non	Non	Non	Non	Non	Non
chrY	24039133	24040633	-	NM_001006118_1	None	coding gene	Non	Non	Non	Non	Non	Non	Non	Non	Non	Non	Non	Non	Non	Non	Non	Non	Non	Non	Non	Non
chrY	24062674	24064174	-	NM_001006118_2	None	coding gene	Non	Non	Non	Non	Non	Non	Non	Non	Non	Non	Non	Non	Non	Non	Non	Non	Non	Non	Non	Non
chrY	23673263	23674763	+	NM_001006120	RBMY1D	coding gene	Non	Non	Non	Non	Non	Non	Non	Non	Non	Non	Non	Non	Non	Non	Non	Non	Non	Non	Non	Non
chrY	23696804	23698304	+	NM_001006120_1	None	coding gene	Non	Non	Non	Non	Non	Non	Non	Non	Non	Non	Non	Non	Non	Non	Non	Non	Non	Non	Non	Non
chrY	24039133	24040633	-	NM_001006120_2	None	coding gene	Non	Non	Non	Non	Non	Non	Non	Non	Non	Non	Non	Non	Non	Non	Non	Non	Non	Non	Non	Non
chrY	24062674	24064174	-	NM_001006120_3	None	coding gene	Non	Non	Non	Non	Non	Non	Non	Non	Non	Non	Non	Non	Non	Non	Non	Non	Non	Non	Non	Non
chrY	24062714	24064214	-	NM_001006121	RBMY1B	coding gene	Non	Non	Non	Non	Non	Non	Non	Non	Non	Non	Non	Non	Non	Non	Non	Non	Non	Non	Non	Non
chrY	23673223	23674723	+	NM_001006121_1	None	coding gene	Non	Non	Non	Non	Non	Non	Non	Non	Non	Non	Non	Non	Non	Non	Non	Non	Non	Non	Non	Non
chrY	23696764	23698264	+	NM_001006121_2	None	coding gene	Non	Non	Non	Non	Non	Non	Non	Non	Non	Non	Non	Non	Non	Non	Non	Non	Non	Non	Non	Non
chrY	24039173	24040673	-	NM_001006121_3	None	coding gene	Non	Non	Non	Non	Non	Non	Non	Non	Non	Non	Non	Non	Non	Non	Non	Non	Non	Non	Non	Non
chr5	65222381	65223881	+	NM_001006600	ERBIN	coding gene	Broad	Broad	Broad	Broad	Broad	Broad	Broad	Broad	Broad	Broad	Broad	Broad	Intermediate	Broad	Broad	Broad	Intermediate	Broad	Broad	Broad
chr1	93425579	93427079	-	NM_001006605	DIPK1A	coding gene	Intermediate	Sharp	Intermediate	Sharp	Sharp	Intermediate	Sharp	Intermediate	Sharp	Intermediate	Sharp	Intermediate	Sharp	Sharp	Intermediate	Sharp	Intermediate	Sharp	Intermediate	Intermediate
chr17	44590075	44591575	+	NM_001006607_1	None	coding gene	Non	Non	Non	Non	Non	Non	Non	Non	Non	Non	Non	Non	Non	Non	Non	Non	Non	Non	Non	Non
chr16	48398284	48399784	-	NM_001006610	SIAH1	coding gene	Sharp	Sharp	Sharp	Sharp	Sharp	Sharp	Sharp	Sharp	Sharp	Sharp	Sharp	Sharp	Non	Non	Sharp	Sharp	Sharp	Sharp	Non	Sharp
chrX	102611379	102612879	+	NM_001006612	TCEAL9	coding gene	Sharp	Sharp	Sharp	Sharp	Non	Sharp	Sharp	Sharp	Sharp	Sharp	Sharp	Sharp	Sharp	Sharp	Sharp	Sharp	Sharp	Sharp	Sharp	Non
chrX	102611379	102612879	+	NM_001006613	TCEAL9	coding gene	Sharp	Sharp	Sharp	Sharp	Non	Sharp	Sharp	Sharp	Sharp	Sharp	Sharp	Sharp	Sharp	Sharp	Sharp	Sharp	Sharp	Sharp	Sharp	Non
chrX	102611379	102612879	+	NM_001006614	TCEAL9	coding gene	Sharp	Sharp	Sharp	Sharp	Non	Sharp	Sharp	Sharp	Sharp	Sharp	Sharp	Sharp	Sharp	Sharp	Sharp	Sharp	Sharp	Sharp	Sharp	Non
chr5	176074387	176075887	+	NM_001006616	TSPAN17	coding gene	Sharp	Sharp	Sharp	Sharp	Sharp	Sharp	Sharp	Sharp	Sharp	Intermediate	Sharp	Intermediate	Sharp	Sharp	Sharp	Sharp	Sharp	Sharp	Intermediate	Sharp
chr9	128468013	128469513	-	NM_001006617	MAPKAP1	coding gene	Sharp	Sharp	Sharp	Sharp	Sharp	Sharp	Sharp	Sharp	Sharp	Sharp	Sharp	Sharp	Sharp	Sharp	Sharp	Sharp	Sharp	Sharp	Sharp	Sharp
chr9	128468013	128469513	-	NM_001006618	MAPKAP1	coding gene	Sharp	Sharp	Sharp	Sharp	Sharp	Sharp	Sharp	Sharp	Sharp	Sharp	Sharp	Sharp	Sharp	Sharp	Sharp	Sharp	Sharp	Sharp	Sharp	Sharp
chr9	128468013	128469513	-	NM_001006619	MAPKAP1	coding gene	Sharp	Sharp	Sharp	Sharp	Sharp	Sharp	Sharp	Sharp	Sharp	Sharp	Sharp	Sharp	Sharp	Sharp	Sharp	Sharp	Sharp	Sharp	Sharp	Sharp
chr9	128468013	128469513	-	NM_001006620	MAPKAP1	coding gene	Sharp	Sharp	Sharp	Sharp	Sharp	Sharp	Sharp	Sharp	Sharp	Sharp	Sharp	Sharp	Sharp	Sharp	Sharp	Sharp	Sharp	Sharp	Sharp	Sharp
chr9	128468013	128469513	-	NM_001006621	MAPKAP1	coding gene	Sharp	Sharp	Sharp	Sharp	Sharp	Sharp	Sharp	Sharp	Sharp	Sharp	Sharp	Sharp	Sharp	Sharp	Sharp	Sharp	Sharp	Sharp	Sharp	Sharp
chr2	128567261	128568761	-	NM_001006622	WDR33	coding gene	Sharp	Sharp	Sharp	Sharp	Sharp	Intermediate	Intermediate	Broad	Intermediate	Sharp	Sharp	Intermediate	Sharp	Broad	Sharp	Broad	Sharp	Sharp	Intermediate	Intermediate
chr2	128567261	128568761	-	NM_001006623	WDR33	coding gene	Sharp	Sharp	Sharp	Sharp	Sharp	Intermediate	Intermediate	Broad	Intermediate	Sharp	Sharp	Intermediate	Sharp	Broad	Sharp	Broad	Sharp	Sharp	Intermediate	Intermediate
chr1	13911966	13913466	+	NM_001006624	PDPN	coding gene	Non	Non	Non	Non	Non	Non	Non	Non	Non	Non	Non	Non	Non	Non	Non	Non	Non	Non	Non	Non
chr1	13911966	13913466	+	NM_001006625	PDPN	coding gene	Non	Non	Non	Non	Non	Non	Non	Non	Non	Non	Non	Non	Non	Non	Non	Non	Non	Non	Non	Non
chr7	136553868	136555368	+	NM_001006626	CHRM2	coding gene	Non	Non	Non	Non	Non	Non	Non	Non	Non	Non	Non	Non	Non	Non	Non	Non	Non	Non	Non	Non
chr7	136553398	136554898	+	NM_001006627	CHRM2	coding gene	Non	Non	Non	Non	Non	Non	Non	Non	Non	Non	Non	Non	Non	Non	Non	Non	Non	Non	Non	Non
chr7	136553992	136555492	+	NM_001006628	CHRM2	coding gene	Non	Non	Non	Non	Non	Non	Non	Non	Non	Non	Non	Non	Non	Non	Non	Non	Non	Non	Non	Non
chr7	136553983	136555483	+	NM_001006629	CHRM2	coding gene	Non	Non	Non	Non	Non	Non	Non	Non	Non	Non	Non	Non	Non	Non	Non	Non	Non	Non	Non	Non
chr7	136553398	136554898	+	NM_001006630	CHRM2	coding gene	Non	Non	Non	Non	Non	Non	Non	Non	Non	Non	Non	Non	Non	Non	Non	Non	Non	Non	Non	Non
chr7	136553831	136555331	+	NM_001006631	CHRM2	coding gene	Non	Non	Non	Non	Non	Non	Non	Non	Non	Non	Non	Non	Non	Non	Non	Non	Non	Non	Non	Non
chr7	136553831	136555331	+	NM_001006632	CHRM2	coding gene	Non	Non	Non	Non	Non	Non	Non	Non	Non	Non	Non	Non	Non	Non	Non	Non	Non	Non	Non	Non
chr16	25025175	25026675	-	NM_001006634	ARHGAP17	coding gene	Sharp	Sharp	Sharp	Sharp	Sharp	Intermediate	Sharp	Intermediate	Sharp	Sharp	Sharp	Sharp	Sharp	Intermediate	Sharp	Intermadiate	Sharp	Sharp	Sharp	Sharp
chr2	145050560	145052060	-	NM_001006636	GTDC1	coding gene	Non	Non	Non	Non	Non	Non	Non	Non	Non	Non	Non	Non	Non	Non	Non	Non	Non	Non	Non	Non
chr17	72733355	72734855	+	NM_001006638	RAB37	coding gene	Intermediate	Sharp	Sharp	Intermediate	Intermediate	Intermediate	Intermediate	Intermediate	Intermediate	Intermediate	Intermediate	Intermediate	Sharp	Sharp	Intermediate	Broad	Sharp	Intermediate	Intermediate	Intermediate
chrX	102883891	102885391	+	NM_001006639	TCEAL1	coding gene	Sharp	Sharp	Sharp	Sharp	Sharp	Sharp	Sharp	Sharp	Sharp	Sharp	Sharp	Sharp	Sharp	Sharp	Sharp	Sharp	Sharp	Sharp	Sharp	Sharp
chrX	102883647	102885147	+	NM_001006640	TCEAL1	coding gene	Sharp	Sharp	Sharp	Sharp	Sharp	Sharp	Sharp	Sharp	Sharp	Sharp	Sharp	Sharp	Sharp	Sharp	Sharp	Sharp	Sharp	Sharp	Sharp	Sharp
chr9	130830478	130831978	+	NM_001006641	SLC25A25	coding gene	Intermediate	Intermediate	Intermediate	Intermediate	Sharp	Intermediate	Broad	Intermediate	Broad	Broad	Intermediate	Broad	Sharp	Broad	Intermediate	Broad	Broad	Broad	Broad	Broad
chr9	130854127	130855627	+	NM_001006642	SLC25A25	coding gene	Non	Non	Non	Non	Non	Non	Non	Non	Non	Sharp	Non	Non	Non	Non	Sharp	Non	Non	Sharp	Non	Non
chr9	130860835	130862335	+	NM_001006643	None	coding gene	Non	Non	Non	Non	Non	Intermediate	Sharp	Non	Sharp	Sharp	Non	Sharp	Sharp	Non	Sharp	Non	Sharp	Sharp	Sharp	Non
chr4	187070326	187071826	+	NM_001006655	FAM149A	coding gene	Non	Non	Non	Non	Non	Non	Non	Non	Non	Non	Non	Non	Non	Non	Non	Non	Non	Non	Non	Non
chr19	50529211	50530711	+	NM_001006656	ZNF473	coding gene	Sharp	Sharp	Sharp	Sharp	Sharp	Sharp	Sharp	Sharp	Sharp	Sharp	Sharp	Sharp	Non	Intermediate	Intermediate	Intermadiate	Sharp	Sharp	Intermediate	Sharp
chr2	20188384	20189884	-	NM_001006657	WDR35	coding gene	Sharp	Sharp	Sharp	Sharp	Non	Non	Sharp	Sharp	Sharp	Sharp	Sharp	Sharp	Sharp	Non	Sharp	Non	Sharp	Sharp	Non	Non
chr1	207627644	207629144	+	NM_001006658	CR2	coding gene	Sharp	Sharp	Sharp	Sharp	Sharp	Broad	Sharp	Sharp	Sharp	Intermediate	Sharp	Sharp	Sharp	Sharp	Sharp	Non	Broad	Sharp	Sharp	Non
chr1	26872342	26873842	+	NM_001006665	RPS6KA1	coding gene	Sharp	Sharp	Sharp	Sharp	Sharp	Sharp	Sharp	Sharp	Sharp	Sharp	Sharp	Sharp	Sharp	Sharp	Sharp	Sharp	Sharp	Sharp	Sharp	Sharp
chr22	39436672	39438172	+	NM_001006666	APOBEC3F	coding gene	Sharp	Sharp	Sharp	Sharp	Sharp	Sharp	Sharp	Sharp	Sharp	Sharp	Sharp	Sharp	Sharp	Sharp	Sharp	Sharp	Sharp	Sharp	Sharp	Sharp
chrX	57146479	57147979	-	NM_001006681	SPIN2B	coding gene	Sharp	Sharp	Sharp	Sharp	Sharp	Sharp	Sharp	Sharp	Sharp	Sharp	Sharp	Sharp	Sharp	Sharp	Sharp	Sharp	Sharp	Sharp	Sharp	Sharp
chrX	57146479	57147979	-	NM_001006682	SPIN2B	coding gene	Sharp	Sharp	Sharp	Sharp	Sharp	Sharp	Sharp	Sharp	Sharp	Sharp	Sharp	Sharp	Sharp	Sharp	Sharp	Sharp	Sharp	Sharp	Sharp	Sharp
chrX	57146479	57147979	-	NM_001006683	SPIN2B	coding gene	Sharp	Sharp	Sharp	Sharp	Sharp	Sharp	Sharp	Sharp	Sharp	Sharp	Sharp	Sharp	Sharp	Sharp	Sharp	Sharp	Sharp	Sharp	Sharp	Sharp
chrX	102508621	102510121	-	NM_001006684	TCEAL8	coding gene	Sharp	Sharp	Sharp	Sharp	Sharp	Sharp	Sharp	Sharp	Sharp	Sharp	Sharp	Sharp	Sharp	Sharp	Sharp	Intermadiate	Sharp	Sharp	Sharp	Sharp
chr6	167274271	167275771	-	NM_001006932	RPS6KA2	coding gene	Sharp	Sharp	Sharp	Sharp	Non	Sharp	Sharp	Sharp	Sharp	Sharp	Sharp	Sharp	Non	Sharp	Non	Sharp	Non	Sharp	Sharp	Non
chrX	102862833	102864333	+	NM_001006933	TCEAL3	coding gene	Sharp	Sharp	Sharp	Sharp	Sharp	Sharp	Sharp	Sharp	Sharp	Sharp	Sharp	Sharp	Sharp	Sharp	Sharp	Sharp	Sharp	Sharp	Sharp	Sharp
chrX	102840418	102841918	+	NM_001006935	TCEAL4	coding gene	Sharp	Sharp	Sharp	Sharp	Sharp	Sharp	Sharp	Sharp	Sharp	Sharp	Sharp	Sharp	Sharp	Sharp	Sharp	Sharp	Sharp	Sharp	Sharp	Non
chrX	102840418	102841918	+	NM_001006937	TCEAL4	coding gene	Sharp	Sharp	Sharp	Sharp	Sharp	Sharp	Sharp	Sharp	Sharp	Sharp	Sharp	Sharp	Sharp	Sharp	Sharp	Sharp	Sharp	Sharp	Sharp	Non
chrX	101395888	101397388	-	NM_001006938	TCEAL6	coding gene	Non	Non	Non	Non	Non	Non	Non	Non	Non	Sharp	Non	Non	Non	Non	Non	Non	Non	Non	Non	Non
chr10	50120780	50122280	-	NM_001006939	LRRC18	coding gene	Non	Non	Non	Non	Non	Non	Non	Non	Non	Non	Non	Non	Non	Non	Non	Non	Non	Non	Non	Non
chr3	183965813	183967313	-	NM_001006941	ALG3	coding gene	Intermediate	Sharp	Sharp	Sharp	Sharp	Sharp	Sharp	Sharp	Sharp	Sharp	Sharp	Sharp	Sharp	Sharp	Sharp	Sharp	Sharp	Sharp	Intermediate	Sharp
chr1	22890003	22891503	+	NM_001006943	EPHA8	coding gene	Non	Non	Non	Non	Non	Non	Non	Non	Non	Non	Non	Non	Non	Non	Non	Non	Non	Non	Non	Non
chr11	64126624	64128124	+	NM_001006944	RPS6KA4	coding gene	Sharp	Sharp	Sharp	Sharp	Sharp	Sharp	Sharp	Sharp	Sharp	Sharp	Sharp	Sharp	Sharp	Sharp	Sharp	Sharp	Sharp	Sharp	Sharp	Sharp
chr1	111505066	111506566	-	NM_001006945	LRIF1	coding gene	Sharp	Sharp	Sharp	Sharp	Sharp	Intermediate	Sharp	Sharp	Sharp	Sharp	Sharp	Sharp	Sharp	Intermediate	Sharp	Broad	Sharp	Sharp	Intermediate	Sharp
chr2	20423694	20425194	-	NM_001006946	SDC1	coding gene	Sharp	Sharp	Sharp	Sharp	Non	Sharp	Sharp	Non	Sharp	Sharp	Sharp	Sharp	Sharp	Non	Sharp	Non	Non	Sharp	Sharp	Non
chr12	100535142	100536642	-	NM_001006947	UHRF1BP1L	coding gene	Sharp	Sharp	Sharp	Sharp	Sharp	Sharp	Sharp	Sharp	Sharp	Sharp	Sharp	Sharp	Sharp	Sharp	Sharp	Sharp	Sharp	Sharp	Sharp	Sharp
chrX	71495641	71497141	-	NM_001007	RPS4X	coding gene	Sharp	Sharp	Sharp	Sharp	Sharp	Intermediate	Intermediate	Intermediate	Sharp	Intermediate	Sharp	Sharp	Non	Intermediate	Intermediate	Broad	Sharp	Intermediate	Broad	Intermediate
chr1	86860525	86862025	-	NM_001007022	ODF2L	coding gene	Sharp	Sharp	Sharp	Sharp	Sharp	Intermediate	Intermediate	Intermediate	Sharp	Sharp	Intermediate	Intermediate	Sharp	Sharp	Sharp	Intermadiate	Sharp	Sharp	Sharp	Sharp
chr14	80676364	80677864	-	NM_001007023	None	coding gene	Non	Non	Non	Non	Non	Non	Non	Sharp	Non	Non	Non	Non	Non	Non	Non	Non	Non	Non	Non	Non
chr17	28804425	28805925	+	NM_001007024	GOSR1	coding gene	Sharp	Sharp	Sharp	Sharp	Sharp	Sharp	Sharp	Sharp	Sharp	Sharp	Sharp	Sharp	Sharp	Sharp	Sharp	Sharp	Sharp	Sharp	Sharp	Sharp
chr17	28804425	28805925	+	NM_001007025	GOSR1	coding gene	Sharp	Sharp	Sharp	Sharp	Sharp	Sharp	Sharp	Sharp	Sharp	Sharp	Sharp	Sharp	Sharp	Sharp	Sharp	Sharp	Sharp	Sharp	Sharp	Sharp
chr12	7033625	7035125	+	NM_001007026	ATN1	coding gene	Non	Non	Sharp	Sharp	Non	Sharp	Sharp	Sharp	Sharp	Sharp	Sharp	Sharp	Non	Sharp	Sharp	Sharp	Sharp	Broad	Sharp	Sharp
chr11	77849199	77850699	-	NM_001007027	ALG8	coding gene	Sharp	Sharp	Sharp	Sharp	Sharp	Sharp	Sharp	Sharp	Sharp	Sharp	Sharp	Sharp	Sharp	Intermediate	Sharp	Sharp	Sharp	Sharp	Intermediate	Sharp
chr12	8608590	8610090	+	NM_001007033	CLEC6A	coding gene	Non	Non	Non	Non	Non	Non	Non	Non	Non	Non	Non	Non	Non	Non	Non	Non	Non	Non	Non	Non
chr8	59465727	59467227	+	NM_001007067	SDCBP	coding gene	Intermediate	Sharp	Sharp	Intermediate	Sharp	Intermediate	Intermediate	Intermediate	Sharp	Intermediate	Sharp	Intermediate	Sharp	Sharp	Sharp	Sharp	Sharp	Sharp	Sharp	Sharp
chr8	59465727	59467227	+	NM_001007068	SDCBP	coding gene	Intermediate	Sharp	Sharp	Intermediate	Sharp	Intermediate	Intermediate	Intermediate	Sharp	Intermediate	Sharp	Intermediate	Sharp	Sharp	Sharp	Sharp	Sharp	Sharp	Sharp	Sharp
chr8	59465727	59467227	+	NM_001007069	SDCBP	coding gene	Intermediate	Sharp	Sharp	Intermediate	Sharp	Intermediate	Intermediate	Intermediate	Sharp	Intermediate	Sharp	Intermediate	Sharp	Sharp	Sharp	Sharp	Sharp	Sharp	Sharp	Sharp
chr8	59465727	59467227	+	NM_001007070	SDCBP	coding gene	Intermediate	Sharp	Sharp	Intermediate	Sharp	Intermediate	Intermediate	Intermediate	Sharp	Intermediate	Sharp	Intermediate	Sharp	Sharp	Sharp	Sharp	Sharp	Sharp	Sharp	Sharp
chr15	85144248	85145748	+	NM_001007072	ZSCAN2	coding gene	Sharp	Sharp	Sharp	Sharp	Sharp	Sharp	Intermediate	Broad	Sharp	Sharp	Sharp	Intermediate	Sharp	Intermediate	Sharp	Broad	Intermediate	Sharp	Broad	Intermediate
chr3	12881581	12883081	-	NM_001007073	RPL32	coding gene	Sharp	Sharp	Sharp	Sharp	Sharp	Intermediate	Sharp	Intermediate	Intermediate	Sharp	Sharp	Intermediate	Sharp	Broad	Intermediate	Broad	Sharp	Intermediate	Broad	Intermediate
chr3	12880449	12881949	-	NM_001007074	RPL32	coding gene	Sharp	Sharp	Sharp	Sharp	Sharp	Intermediate	Sharp	Intermediate	Intermediate	Sharp	Sharp	Intermediate	Non	Broad	Intermediate	Broad	Sharp	Intermediate	Broad	Intermediate
chr4	39046450	39047950	+	NM_001007075	KLHL5	coding gene	Sharp	Sharp	Sharp	Sharp	Sharp	Sharp	Sharp	Intermediate	Sharp	Sharp	Sharp	Sharp	Sharp	Sharp	Sharp	Broad	Sharp	Sharp	Sharp	Sharp
chrX	47861877	47863377	-	NM_001007088	ZNF182	coding gene	Sharp	Sharp	Sharp	Sharp	Sharp	Sharp	Sharp	Intermediate	Sharp	Sharp	Sharp	Sharp	Sharp	Sharp	Sharp	Sharp	Sharp	Sharp	Sharp	Sharp
chr2	220196399	220197899	-	NM_001007089	RESP18	coding gene	Non	Non	Non	Non	Non	Non	Non	Non	Non	Non	Non	Non	Non	Non	Non	Non	Non	Non	Non	Non
chr8	13424351	13425851	+	NM_001007090	C8orf48	coding gene	Non	Non	Sharp	Sharp	Non	Non	Non	Non	Non	Non	Non	Non	Non	Non	Non	Non	Non	Non	Non	Non
chr10	38383263	38384763	+	NM_001007094	ZNF37A	coding gene	Sharp	Sharp	Sharp	Sharp	Sharp	Sharp	Sharp	Sharp	Sharp	Sharp	Sharp	Sharp	Sharp	Intermediate	Sharp	Sharp	Sharp	Sharp	Sharp	Sharp
chr9	87284625	87286125	+	NM_001007097	NTRK2	coding gene	Non	Non	Non	Non	Non	Non	Non	Non	Non	Non	Non	Non	Non	Non	Non	Non	Non	Non	Non	Non
chr1	53392900	53394400	+	NM_001007098	SCP2	coding gene	Sharp	Sharp	Sharp	Sharp	Non	Sharp	Sharp	Sharp	Sharp	Sharp	Sharp	Sharp	Sharp	Sharp	Sharp	Sharp	Sharp	Sharp	Sharp	Non
chr1	53480609	53482109	+	NM_001007099	SCP2	coding gene	Sharp	Sharp	Sharp	Sharp	Sharp	Sharp	Sharp	Sharp	Sharp	Sharp	Sharp	Sharp	Non	Sharp	Sharp	Sharp	Sharp	Sharp	Intermediate	Sharp
chr1	53480609	53482109	+	NM_001007100	SCP2	coding gene	Sharp	Sharp	Sharp	Sharp	Sharp	Sharp	Sharp	Sharp	Sharp	Sharp	Sharp	Sharp	Non	Sharp	Sharp	Sharp	Sharp	Sharp	Intermediate	Sharp
chr9	95638770	95640270	-	NM_001007101	ZNF484	coding gene	Sharp	Sharp	Sharp	Sharp	Sharp	Sharp	Sharp	Sharp	Sharp	Sharp	Sharp	Sharp	Sharp	Intermediate	Sharp	Intermadiate	Sharp	Sharp	Sharp	Sharp
chr6	130339727	130341227	+	NM_001007102	L3MBTL3	coding gene	Intermediate	Intermediate	Intermediate	Intermediate	Broad	Intermediate	Intermediate	Intermediate	Intermediate	Intermediate	Intermediate	Intermediate	Intermediate	Non	Intermediate	Sharp	Intermediate	Intermediate	Intermediate	Non
chr15	83473306	83474806	-	NM_001007122	FSD2	coding gene	Non	Non	Non	Non	Non	Non	Non	Non	Non	Non	Non	Non	Non	Non	Non	Non	Non	Non	Non	Non
chr20	62714212	62715712	-	NM_001007125	LKAAEAR1	coding gene	Sharp	Sharp	Sharp	Intermediate	Sharp	Sharp	Sharp	Intermediate	Sharp	Sharp	Sharp	Intermediate	Sharp	Sharp	Sharp	Sharp	Sharp	Sharp	Sharp	Sharp
chr11	2169333	2170833	-	NM_001007139	IGF2	coding gene	Non	Non	Non	Non	Non	Non	Non	Non	Non	Non	Non	Non	Non	Non	Non	Non	Non	Non	Non	Non
chr15	88798462	88799962	-	NM_001007156	NTRK3	coding gene	Sharp	Sharp	Intermediate	Intermediate	Non	Non	Sharp	Sharp	Intermediate	Intermediate	Sharp	Intermediate	Sharp	Non	Sharp	Sharp	Sharp	Sharp	Sharp	Non
chr9	114287446	114288946	+	NM_001007169	ZNF483	coding gene	Sharp	Sharp	Sharp	Sharp	Non	Non	Sharp	Non	Sharp	Sharp	Non	Non	Non	Non	Sharp	Non	Non	Non	Non	Non
chr8	49984899	49986399	+	NM_001007176	PPDPFL	coding gene	Non	Non	Non	Non	Non	Non	Non	Non	Non	Non	Non	Non	Non	Non	Non	Non	Non	Non	Non	Non
chr22	32150008	32151508	+	NM_001007188	DEPDC5	coding gene	Sharp	Sharp	Sharp	Sharp	Sharp	Sharp	Sharp	Sharp	Sharp	Sharp	Sharp	Sharp	Sharp	Sharp	Sharp	Sharp	Sharp	Sharp	Sharp	Sharp
chr5	139505520	139507020	+	NM_001007189	IGIP	coding gene	Non	Non	Non	Non	Non	Non	Non	Non	Non	Non	Non	Non	Non	Non	Non	Non	Non	Non	Non	Non
chr1	174968570	174970070	+	NM_001007214	CACYBP	coding gene	Intermediate	Intermediate	Intermediate	Intermediate	Sharp	Intermediate	Intermediate	Intermediate	Intermediate	Intermediate	Intermediate	Intermediate	Sharp	Broad	Intermediate	Broad	Intermediate	Intermediate	Broad	Intermediate
chr3	185541327	185542827	-	NM_001007225	IGF2BP2	coding gene	Intermediate	Intermediate	Intermediate	Intermediate	Broad	Intermediate	Intermediate	Broad	Intermediate	Intermediate	Intermediate	Intermediate	Intermediate	Non	Sharp	Sharp	Non	Sharp	Intermediate	Non
chr17	47754025	47755525	-	NM_001007226	SPOP	coding gene	Sharp	Sharp	Sharp	Intermediate	Sharp	Sharp	Sharp	Intermediate	Sharp	Sharp	Sharp	Sharp	Sharp	Sharp	Sharp	Intermadiate	Sharp	Sharp	Sharp	Sharp
chr17	47754025	47755525	-	NM_001007227	SPOP	coding gene	Sharp	Sharp	Sharp	Intermediate	Sharp	Sharp	Sharp	Intermediate	Sharp	Sharp	Sharp	Sharp	Sharp	Sharp	Sharp	Intermadiate	Sharp	Sharp	Sharp	Sharp
chr17	47754025	47755525	-	NM_001007228	SPOP	coding gene	Sharp	Sharp	Sharp	Intermediate	Sharp	Sharp	Sharp	Intermediate	Sharp	Sharp	Sharp	Sharp	Sharp	Sharp	Sharp	Intermadiate	Sharp	Sharp	Sharp	Sharp
chr17	47754025	47755525	-	NM_001007229	SPOP	coding gene	Sharp	Sharp	Sharp	Intermediate	Sharp	Sharp	Sharp	Intermediate	Sharp	Sharp	Sharp	Sharp	Sharp	Sharp	Sharp	Intermadiate	Sharp	Sharp	Sharp	Sharp
chr17	47754025	47755525	-	NM_001007230	SPOP	coding gene	Sharp	Sharp	Sharp	Intermediate	Sharp	Sharp	Sharp	Intermediate	Sharp	Sharp	Sharp	Sharp	Sharp	Sharp	Sharp	Intermadiate	Sharp	Sharp	Sharp	Sharp
chr2	68961912	68963412	+	NM_001007231	ARHGAP25	coding gene	Broad	Broad	Broad	Intermediate	Non	Sharp	Intermediate	Broad	Broad	Broad	Broad	Broad	Non	Broad	Intermediate	Broad	Broad	Non	Sharp	Intermediate
chr11	104970658	104972158	-	NM_001007232	CARD17	coding gene	Non	Non	Non	Non	Non	Non	Non	Sharp	Non	Non	Non	Non	Non	Non	Non	Non	Non	Non	Non	Non
chr1	117208814	117210314	-	NM_001007237	IGSF3	coding gene	Sharp	Sharp	Sharp	Sharp	Non	Non	Sharp	Non	Sharp	Sharp	Sharp	Sharp	Sharp	Non	Sharp	Sharp	Sharp	Sharp	Sharp	Non
chr1	171750760	171752260	+	NM_001007239	EEF1AKNMT	coding gene	Sharp	Sharp	Sharp	Sharp	Sharp	Sharp	Sharp	Sharp	Sharp	Sharp	Sharp	Sharp	Sharp	Broad	Intermediate	Broad	Sharp	Sharp	Intermediate	Sharp
chr16	20337335	20338835	-	NM_001007240	GP2	coding gene	Non	Non	Non	Non	Non	Non	Non	Non	Non	Non	Non	Non	Non	Non	Non	Non	Non	Non	Non	Non
chr16	20337335	20338835	-	NM_001007241	GP2	coding gene	Non	Non	Non	Non	Non	Non	Non	Non	Non	Non	Non	Non	Non	Non	Non	Non	Non	Non	Non	Non
chr16	20337335	20338835	-	NM_001007242	GP2	coding gene	Non	Non	Non	Non	Non	Non	Non	Non	Non	Non	Non	Non	Non	Non	Non	Non	Non	Non	Non	Non
chr7	112063198	112064698	+	NM_001007245	IFRD1	coding gene	Non	Non	Non	Non	Non	Non	Sharp	Non	Non	Sharp	Sharp	Sharp	Non	Sharp	Sharp	Sharp	Sharp	Sharp	Intermediate	Sharp
chr21	40684212	40685712	-	NM_001007246	BRWD1	coding gene	Intermediate	Intermediate	Intermediate	Sharp	Sharp	Intermediate	Intermediate	Intermediate	Intermediate	Intermediate	Intermediate	Intermediate	Sharp	Intermediate	Intermediate	Intermadiate	Sharp	Intermediate	Intermediate	Sharp
chr19	35262634	35264134	-	NM_001007248	ZNF599	coding gene	Sharp	Sharp	Sharp	Sharp	Sharp	Sharp	Sharp	Sharp	Sharp	Sharp	Sharp	Sharp	Sharp	Sharp	Sharp	Sharp	Sharp	Sharp	Sharp	Sharp
chr11	124095397	124096897	+	NM_001007249	None	coding gene	Non	Non	Non	Non	Non	Non	Non	Non	Non	Non	Non	Non	Non	Non	Non	Non	Non	Non	Non	Non
chr1	53480609	53482109	+	NM_001007250	SCP2	coding gene	Sharp	Sharp	Sharp	Sharp	Sharp	Sharp	Sharp	Sharp	Sharp	Sharp	Sharp	Sharp	Non	Sharp	Sharp	Sharp	Sharp	Sharp	Intermediate	Sharp
chr7	64465624	64467124	-	NM_001007253	ERV3-1	coding gene	Sharp	Sharp	Sharp	Sharp	Sharp	Sharp	Sharp	Sharp	Sharp	Sharp	Sharp	Sharp	Sharp	Sharp	Sharp	Broad	Sharp	Sharp	Intermediate	Sharp
chr1	161068180	161069680	+	NM_001007255	KLHDC9	coding gene	Sharp	Sharp	Sharp	Sharp	Sharp	Sharp	Sharp	Sharp	Sharp	Sharp	Sharp	Sharp	Sharp	Sharp	Sharp	Non	Non	Sharp	Sharp	Sharp
chr1	14075875	14077375	+	NM_001007257	PRDM2	coding gene	Sharp	Sharp	Sharp	Sharp	Sharp	Intermediate	Sharp	Intermediate	Sharp	Sharp	Intermediate	Sharp	Sharp	Intermediate	Sharp	Broad	Sharp	Sharp	Intermediate	Sharp
chr21	37431111	37432611	-	NM_001007259	SETD4	coding gene	Sharp	Sharp	Sharp	Sharp	Sharp	Sharp	Sharp	Sharp	Sharp	Sharp	Sharp	Sharp	Sharp	Intermediate	Sharp	Intermadiate	Sharp	Sharp	Sharp	Sharp
chr2	160917626	160919126	-	NM_001007267	PLA2R1	coding gene	Sharp	Sharp	Sharp	Sharp	Non	Sharp	Sharp	Non	Sharp	Sharp	Sharp	Sharp	Sharp	Non	Non	Non	Non	Non	Non	Non
chr19	45582529	45584029	+	NM_001007269	GEMIN7	coding gene	Sharp	Sharp	Sharp	Sharp	Sharp	Sharp	Sharp	Sharp	Sharp	Sharp	Sharp	Sharp	Sharp	Sharp	Sharp	Sharp	Sharp	Sharp	Sharp	Sharp
chr19	45582517	45584017	+	NM_001007270	GEMIN7	coding gene	Sharp	Sharp	Sharp	Sharp	Sharp	Sharp	Sharp	Sharp	Sharp	Sharp	Sharp	Sharp	Sharp	Sharp	Sharp	Sharp	Sharp	Sharp	Sharp	Sharp
chr10	76867470	76868970	-	NM_001007271	DUSP13	coding gene	Non	Non	Non	Non	Non	Non	Non	Non	Non	Non	Non	Non	Non	Intermediate	Sharp	Non	Non	Non	Non	Non
chr10	76867470	76868970	-	NM_001007272	DUSP13	coding gene	Non	Non	Non	Non	Non	Non	Non	Non	Non	Non	Non	Non	Non	Intermediate	Sharp	Non	Non	Non	Non	Non
chr10	76867470	76868970	-	NM_001007273	DUSP13	coding gene	Non	Non	Non	Non	Non	Non	Non	Non	Non	Non	Non	Non	Non	Intermediate	Sharp	Non	Non	Non	Non	Non
chr11	125439297	125440797	+	NM_001007277	None	coding gene	Sharp	Sharp	Sharp	Sharp	Sharp	Sharp	Sharp	Sharp	Sharp	Sharp	Sharp	Sharp	Sharp	Sharp	Sharp	Sharp	Sharp	Sharp	Sharp	Sharp
chr13	50571142	50572642	+	NM_001007278	TRIM13	coding gene	Intermediate	Intermediate	Intermediate	Sharp	Intermediate	Broad	Broad	Broad	Intermediate	Broad	Intermediate	Broad	Sharp	Intermediate	Intermediate	Broad	Intermediate	Broad	Intermediate	Broad
chr22	29710248	29711748	-	NM_001007279	None	coding gene	Non	Non	Sharp	Sharp	Non	Sharp	Sharp	Sharp	Sharp	Sharp	Sharp	Sharp	Sharp	Sharp	Sharp	Non	Non	Sharp	Sharp	Non
chr6	116892582	116894082	+	NM_001007464	RWDD1	coding gene	Intermediate	Sharp	Sharp	Sharp	Sharp	Intermediate	Intermediate	Intermediate	Sharp	Sharp	Sharp	Intermediate	Sharp	Intermediate	Intermediate	Intermadiate	Sharp	Sharp	Intermediate	Intermediate
chr6	158733691	158735191	+	NM_001007466	TULP4	coding gene	Non	Non	Non	Non	Non	Non	Non	Sharp	Non	Non	Non	Non	Non	Non	Non	Non	Non	Non	Non	Non
chr22	31892260	31893760	+	NM_001007467	SFI1	coding gene	Sharp	Sharp	Sharp	Sharp	Sharp	Intermediate	Sharp	Sharp	Sharp	Sharp	Sharp	Sharp	Sharp	Sharp	Sharp	Sharp	Sharp	Sharp	Intermediate	Intermediate
chr22	24129149	24130649	+	NM_001007468	SMARCB1	coding gene	Sharp	Sharp	Sharp	Sharp	Sharp	Sharp	Sharp	Sharp	Sharp	Intermediate	Intermediate	Sharp	Sharp	Intermediate	Intermediate	Intermadiate	Sharp	Sharp	Intermediate	Intermediate
chr19	36393381	36394881	+	NM_001007469	HCST	coding gene	Broad	Broad	Broad	Broad	Sharp	Broad	Broad	Broad	Broad	Broad	Broad	Broad	Non	Sharp	Broad	Broad	Broad	Broad	Broad	Broad
chr9	73482474	73483974	-	NM_001007470	TRPM3	coding gene	Non	Non	Non	Non	Non	Non	Non	Non	Non	Non	Non	Non	Non	Non	Non	Non	Non	Non	Non	Non
chr9	73735014	73736514	-	NM_001007471	TRPM3	coding gene	Non	Non	Non	Non	Non	Non	Non	Non	Non	Non	Non	Non	Non	Non	Non	Non	Non	Non	Non	Non
chrX	154114649	154116149	+	NM_001007523	F8A2	coding gene	Sharp	Sharp	Sharp	Sharp	Sharp	Broad	Sharp	Sharp	Intermediate	Intermediate	Sharp	Intermediate	Sharp	Sharp	Non	Non	Sharp	Intermediate	Intermediate	Intermediate
chrX	154611763	154613263	+	NM_001007523_1	None	coding gene	Sharp	Sharp	Sharp	Sharp	Sharp	Broad	Sharp	Intermediate	Intermediate	Sharp	Sharp	Sharp	Sharp	Non	Non	Non	Sharp	Intermediate	Intermediate	Intermediate
chrX	154686761	154688261	-	NM_001007523_2	None	coding gene	Sharp	Sharp	Sharp	Sharp	Sharp	Broad	Sharp	Intermediate	Intermediate	Sharp	Sharp	Sharp	Sharp	Non	Non	Non	Sharp	Intermediate	Intermediate	Intermediate
chrX	154686761	154688261	-	NM_001007524	F8A3	coding gene	Sharp	Sharp	Sharp	Sharp	Sharp	Broad	Sharp	Intermediate	Intermediate	Sharp	Sharp	Sharp	Sharp	Non	Non	Non	Sharp	Intermediate	Intermediate	Intermediate
chrX	154114649	154116149	+	NM_001007524_1	None	coding gene	Sharp	Sharp	Sharp	Sharp	Sharp	Broad	Sharp	Sharp	Intermediate	Intermediate	Sharp	Intermediate	Sharp	Sharp	Non	Non	Sharp	Intermediate	Intermediate	Intermediate
chrX	154611763	154613263	+	NM_001007524_2	None	coding gene	Sharp	Sharp	Sharp	Sharp	Sharp	Broad	Sharp	Intermediate	Intermediate	Sharp	Sharp	Sharp	Sharp	Non	Non	Non	Sharp	Intermediate	Intermediate	Intermediate
chr19	16830786	16832286	+	NM_001007525	NWD1	coding gene	Non	Non	Non	Non	Non	Non	Non	Non	Non	Non	Non	Non	Non	Non	Non	Non	Non	Non	Non	Non
chr5	36150515	36152015	-	NM_001007527	LMBRD2	coding gene	Intermediate	Intermediate	Sharp	Sharp	Sharp	Broad	Intermediate	Intermediate	Intermediate	Sharp	Intermediate	Intermediate	Sharp	Broad	Intermediate	Broad	Sharp	Intermediate	Broad	Intermediate
chr17	14138650	14140150	-	NM_001007530	CDRT15	coding gene	Non	Non	Non	Non	Non	Non	Non	Non	Non	Non	Non	Non	Non	Non	Non	Non	Non	Non	Non	Non
chr6	28227097	28228597	+	NM_001007531	NKAPL	coding gene	Non	Sharp	Non	Non	Non	Non	Non	Non	Sharp	Non	Non	Non	Non	Non	Sharp	Non	Non	Non	Non	Non
chr17	44076615	44078115	+	NM_001007532	STH	coding gene	Non	Non	Non	Non	Non	Non	Non	Non	Non	Non	Non	Non	Non	Non	Non	Non	Non	Non	Non	Non
chr17	79791426	79792926	-	NM_001007533	PPP1R27	coding gene	Sharp	Sharp	Sharp	Sharp	Non	Intermediate	Sharp	Sharp	Sharp	Sharp	Sharp	Sharp	Non	Sharp	Sharp	Sharp	Sharp	Sharp	Intermediate	Sharp
chr13	24469625	24471125	-	NM_001007537	C1QTNF9B	coding gene	Non	Non	Non	Non	Non	Non	Non	Non	Non	Non	Non	Non	Non	Non	Non	Non	Non	Non	Non	Non
chr13	26623698	26625198	-	NM_001007538	SHISA2	coding gene	Non	Intermediate	Intermediate	Sharp	Intermediate	Broad	Intermediate	Intermediate	Broad	Broad	Broad	Intermediate	Non	Broad	Sharp	Broad	Broad	Non	Sharp	Intermediate
chr3	49835754	49837254	-	NM_001007540	CDHR4	coding gene	Non	Non	Non	Non	Non	Non	Non	Non	Non	Non	Non	Non	Non	Non	Non	Non	Non	Non	Non	Non
chr1	206287147	206288647	-	NM_001007544	RHEX	coding gene	Non	Non	Non	Non	Non	Non	Non	Non	Non	Non	Non	Sharp	Non	Non	Non	Non	Non	Non	Non	Non
chrX	134952494	134953994	-	NM_001007551	CT45A5	coding gene	Non	Non	Non	Non	Non	Non	Non	Non	Non	Non	Non	Non	Non	Non	Non	Non	Non	Non	Non	Non
chr1	115299171	115300671	-	NM_001007553	CSDE1	coding gene	Sharp	Sharp	Sharp	Sharp	Sharp	Broad	Broad	Broad	Intermediate	Broad	Intermediate	Intermediate	Sharp	Intermediate	Broad	Broad	Intermediate	Intermediate	Intermediate	Intermediate
chr18	23669111	23670611	-	NM_001007559	SS18	coding gene	Intermediate	Sharp	Intermediate	Intermediate	Intermediate	Broad	Intermediate	Broad	Sharp	Intermediate	Intermediate	Intermediate	Sharp	Sharp	Intermediate	Broad	Sharp	Sharp	Intermediate	Intermediate
chr19	44098787	44100287	-	NM_001007561	IRGQ	coding gene	Intermediate	Intermediate	Intermediate	Intermediate	Sharp	Intermediate	Intermediate	Broad	Intermediate	Sharp	Intermediate	Intermediate	Sharp	Intermediate	Intermediate	Intermadiate	Intermediate	Intermediate	Intermediate	Intermediate
chr9	38422944	38424444	-	NM_001007563	IGFBPL1	coding gene	Non	Non	Sharp	Sharp	Non	Non	Sharp	Non	Sharp	Sharp	Sharp	Sharp	Non	Non	Non	Non	Non	Sharp	Non	Non
chr3	100428133	100429633	+	NM_001007565	TFG	coding gene	Sharp	Sharp	Sharp	Sharp	Sharp	Intermediate	Sharp	Sharp	Sharp	Sharp	Sharp	Sharp	Sharp	Intermediate	Sharp	Broad	Sharp	Sharp	Intermediate	Sharp
chr11	6411643	6413143	+	NM_001007593	SMPD1	coding gene	Sharp	Intermediate	Intermediate	Intermediate	Sharp	Sharp	Sharp	Sharp	Sharp	Sharp	Sharp	Sharp	Sharp	Sharp	Sharp	Sharp	Sharp	Sharp	Sharp	Sharp
chr15	62455982	62457482	-	NM_001007595	C2CD4B	coding gene	Sharp	Sharp	Sharp	Sharp	Non	Non	Sharp	Non	Sharp	Sharp	Sharp	Sharp	Sharp	Intermediate	Sharp	Non	Sharp	Non	Sharp	Non
chr1	156785541	156787041	+	NM_001007792	NTRK1	coding gene	Sharp	Intermediate	Intermediate	Broad	Non	Sharp	Intermediate	Sharp	Intermediate	Intermediate	Sharp	Intermediate	Non	Sharp	Sharp	Sharp	Sharp	Sharp	Sharp	Sharp
chr10	124913759	124915259	+	NM_001007793	BUB3	coding gene	Sharp	Sharp	Sharp	Sharp	Sharp	Sharp	Sharp	Sharp	Sharp	Sharp	Sharp	Sharp	Sharp	Broad	Sharp	Broad	Sharp	Sharp	Broad	Intermediate
chr1	111682248	111683748	+	NM_001007794	CEPT1	coding gene	Sharp	Sharp	Intermediate	Sharp	Sharp	Broad	Intermediate	Intermediate	Intermediate	Intermediate	Intermediate	Broad	Sharp	Broad	Intermediate	Broad	Intermediate	Intermediate	Broad	Intermediate
chrY	2709622	2711122	+	NM_001008	RPS4Y1	coding gene	Sharp	Sharp	Sharp	Sharp	Non	Sharp	Non	Non	Sharp	Sharp	Sharp	Sharp	Non	Broad	Sharp	Non	Sharp	Non	Non	Sharp
chr10	13142081	13143581	+	NM_001008211	OPTN	coding gene	Sharp	Sharp	Sharp	Sharp	Sharp	Sharp	Sharp	Intermediate	Sharp	Sharp	Sharp	Intermediate	Sharp	Sharp	Sharp	Sharp	Sharp	Sharp	Sharp	Sharp
chr10	13142081	13143581	+	NM_001008212	OPTN	coding gene	Sharp	Sharp	Sharp	Sharp	Sharp	Sharp	Sharp	Intermediate	Sharp	Sharp	Sharp	Intermediate	Sharp	Sharp	Sharp	Sharp	Sharp	Sharp	Sharp	Sharp
chr10	13142081	13143581	+	NM_001008213	OPTN	coding gene	Sharp	Sharp	Sharp	Sharp	Sharp	Sharp	Sharp	Intermediate	Sharp	Sharp	Sharp	Intermediate	Sharp	Sharp	Sharp	Sharp	Sharp	Sharp	Sharp	Sharp
chr2	99223481	99224981	-	NM_001008215	COA5	coding gene	Sharp	Sharp	Sharp	Sharp	Sharp	Intermediate	Intermediate	Intermediate	Intermediate	Sharp	Sharp	Sharp	Sharp	Intermediate	Intermediate	Intermadiate	Intermediate	Sharp	Intermediate	Intermediate
chr1	24125794	24127294	-	NM_001008216	GALE	coding gene	Sharp	Sharp	Sharp	Sharp	Sharp	Sharp	Sharp	Sharp	Sharp	Sharp	Sharp	Intermediate	Sharp	Sharp	Sharp	Sharp	Sharp	Sharp	Intermediate	Sharp
chr1	104237389	104238889	-	NM_001008218	AMY1B	coding gene	Non	Non	Non	Non	Non	Non	Non	Non	Non	Non	Non	Non	Non	Non	Non	Non	Non	Non	Non	Non
chr1	104292462	104293962	+	NM_001008218_1	None	coding gene	Non	Non	Non	Non	Non	Non	Non	Non	Non	Non	Non	Non	Non	Non	Non	Non	Non	Non	Non	Non
chr1	104198324	104199824	+	NM_001008218_2	None	coding gene	Non	Non	Non	Non	Non	Non	Non	Non	Non	Non	Non	Non	Non	Non	Non	Non	Non	Non	Non	Non
chr1	104292440	104293940	+	NM_001008219	AMY1C	coding gene	Non	Non	Non	Non	Non	Non	Non	Non	Non	Non	Non	Non	Non	Non	Non	Non	Non	Non	Non	Non
chr1	104237411	104238911	-	NM_001008219_1	None	coding gene	Non	Non	Non	Non	Non	Non	Non	Non	Non	Non	Non	Non	Non	Non	Non	Non	Non	Non	Non	Non
chr1	104198302	104199802	+	NM_001008219_2	None	coding gene	Non	Non	Non	Non	Non	Non	Non	Non	Non	Non	Non	Non	Non	Non	Non	Non	Non	Non	Non	Non
chr5	175298500	175300000	+	NM_001008220	CPLX2	coding gene	Non	Non	Non	Non	Non	Non	Non	Non	Non	Non	Non	Non	Non	Non	Non	Non	Non	Non	Non	Non
chr1	104292278	104293778	+	NM_001008221	AMY1A	coding gene	Non	Non	Non	Non	Non	Non	Non	Non	Non	Non	Non	Non	Non	Non	Non	Non	Non	Non	Non	Non
chr1	104198140	104199640	+	NM_001008221_1	None	coding gene	Non	Non	Non	Non	Non	Non	Non	Non	Non	Non	Non	Non	Non	Non	Non	Non	Non	Non	Non	Non
chr1	104237573	104239073	-	NM_001008221_2	None	coding gene	Non	Non	Non	Non	Non	Non	Non	Non	Non	Non	Non	Non	Non	Non	Non	Non	Non	Non	Non	Non
chrX	128976061	128977561	-	NM_001008222	ZDHHC9	coding gene	Sharp	Sharp	Sharp	Sharp	Sharp	Sharp	Sharp	Sharp	Sharp	Sharp	Sharp	Sharp	Sharp	Sharp	Sharp	Broad	Sharp	Sharp	Sharp	Sharp
chr12	49729471	49730971	-	NM_001008223	C1QL4	coding gene	Non	Non	Sharp	Sharp	Non	Sharp	Sharp	Sharp	Sharp	Sharp	Sharp	Sharp	Non	Sharp	Sharp	Sharp	Sharp	Sharp	Sharp	Sharp
chr15	70993120	70994620	-	NM_001008224	UACA	coding gene	Non	Non	Non	Non	Non	Non	Non	Non	Non	Non	Non	Non	Non	Non	Non	Non	Non	Non	Non	Non
chr7	135193375	135194875	-	NM_001008225	CNOT4	coding gene	Intermediate	Sharp	Intermediate	Sharp	Sharp	Broad	Intermediate	Broad	Intermediate	Intermediate	Intermediate	Intermediate	Sharp	Intermediate	Sharp	Broad	Sharp	Intermediate	Intermediate	Intermediate
chr15	82555151	82556651	+	NM_001008226	SAXO2	coding gene	Sharp	Sharp	Sharp	Sharp	Sharp	Sharp	Sharp	Sharp	Sharp	Sharp	Sharp	Sharp	Sharp	Intermediate	Sharp	Intermadiate	Sharp	Sharp	Intermediate	Sharp
chr6	29624757	29626257	+	NM_001008228	MOG	coding gene	Non	Non	Non	Non	Non	Non	Non	Non	Non	Non	Non	Non	Non	Non	Non	Non	Non	Non	Non	Non
chr6	29624757	29626257	+	NM_001008229_3	None	coding gene	Non	Non	Non	Non	Non	Non	Non	Non	Non	Non	Non	Non	Non	Non	Non	Non	Non	Non	Non	Non
chr2	20100244	20101744	-	NM_001008237	TTC32	coding gene	Intermediate	Intermediate	Intermediate	Intermediate	Sharp	Intermediate	Intermediate	Broad	Intermediate	Intermediate	Intermediate	Intermediate	Sharp	Broad	Intermediate	Broad	Broad	Intermediate	Intermediate	Intermediate
chr18	43753987	43755487	+	NM_001008239	C18orf25	coding gene	Intermediate	Intermediate	Intermediate	Sharp	Sharp	Intermediate	Intermediate	Intermediate	Sharp	Intermediate	Intermediate	Intermediate	Sharp	Intermediate	Intermediate	Intermadiate	Intermediate	Sharp	Intermediate	Intermediate
chr3	48657689	48659189	-	NM_001008269	TMEM89	coding gene	Non	Non	Non	Non	Non	Non	Non	Non	Non	Non	Non	Non	Non	Non	Sharp	Non	Non	Non	Non	Non
chr7	141539721	141541221	-	NM_001008270	PRSS37	coding gene	Non	Non	Non	Non	Non	Non	Non	Non	Non	Non	Non	Non	Non	Non	Non	Non	Non	Non	Non	Non
chr8	145321516	145323016	+	NM_001008271	None	coding gene	Non	Non	Sharp	Sharp	Non	Non	Non	Non	Sharp	Sharp	Non	Non	Non	Non	Non	Non	Non	Non	Non	Non
chr8	145490602	145492102	+	NM_001008271_1	None	coding gene	Non	Non	Sharp	Sharp	Non	Non	Sharp	Non	Sharp	Sharp	Non	Non	Non	Non	Non	Non	Non	Non	Non	Non
chr3	111717585	111719085	+	NM_001008272	TAGLN3	coding gene	Sharp	Sharp	Sharp	Sharp	Non	Sharp	Sharp	Sharp	Sharp	Sharp	Sharp	Non	Non	Non	Non	Non	Non	Non	Sharp	Non
chr3	111718006	111719506	+	NM_001008273	TAGLN3	coding gene	Sharp	Sharp	Sharp	Sharp	Non	Sharp	Sharp	Sharp	Sharp	Sharp	Sharp	Non	Non	Non	Non	Non	Non	Non	Sharp	Non
chr16	31225341	31226841	+	NM_001008274	TRIM72	coding gene	Non	Non	Non	Sharp	Non	Non	Sharp	Non	Sharp	Sharp	Non	Sharp	Non	Non	Non	Non	Non	Non	Non	Non
chr2	79252825	79254325	+	NM_001008387	REG3G	coding gene	Non	Non	Non	Non	Non	Non	Non	Non	Non	Non	Non	Non	Non	Non	Non	Non	Non	Non	Non	Non
chr4	103790134	103791634	+	NM_001008388	CISD2	coding gene	Intermediate	Sharp	Intermediate	Sharp	Sharp	Broad	Intermediate	Intermediate	Intermediate	Broad	Intermediate	Intermediate	Sharp	Broad	Intermediate	Broad	Intermediate	Intermediate	Broad	Intermediate
chr16	20362537	20364037	-	NM_001008389	UMOD	coding gene	Non	Non	Non	Non	Non	Non	Non	Non	Non	Non	Non	Non	Non	Non	Non	Non	Non	Non	Non	Non
chr3	88106646	88108146	-	NM_001008390	CGGBP1	coding gene	Intermediate	Intermediate	Intermediate	Intermediate	Intermediate	Broad	Intermediate	Broad	Intermediate	Broad	Intermediate	Intermediate	Intermediate	Broad	Intermediate	Broad	Intermediate	Intermediate	Broad	Broad
chr11	32814687	32816187	-	NM_001008391	CCDC73	coding gene	Non	Non	Non	Non	Non	Non	Non	Sharp	Non	Sharp	Non	Non	Non	Sharp	Sharp	Sharp	Non	Non	Non	Non
chr3	37903668	37905168	+	NM_001008392	CTDSPL	coding gene	Intermediate	Sharp	Intermediate	Sharp	Sharp	Sharp	Intermediate	Intermediate	Intermediate	Intermediate	Sharp	Intermediate	Sharp	Intermediate	Intermediate	Intermadiate	Intermediate	Intermediate	Intermediate	Intermediate
chr4	159591702	159593202	-	NM_001008393	C4orf46	coding gene	Intermediate	Sharp	Sharp	Sharp	Sharp	Intermediate	Sharp	Intermediate	Sharp	Sharp	Sharp	Intermediate	Sharp	Intermediate	Intermediate	Broad	Sharp	Intermediate	Intermediate	Intermediate
chr12	104697509	104699009	+	NM_001008394	EID3	coding gene	Sharp	Sharp	Sharp	Sharp	Non	Intermediate	Sharp	Sharp	Sharp	Sharp	Sharp	Sharp	Sharp	Non	Non	Non	Non	Sharp	Non	Sharp
chr7	99746529	99748029	+	NM_001008395	LAMTOR4	coding gene	Sharp	Sharp	Sharp	Sharp	Sharp	Sharp	Sharp	Sharp	Sharp	Sharp	Sharp	Sharp	Sharp	Sharp	Sharp	Sharp	Sharp	Sharp	Sharp	Sharp
chr14	55492319	55493819	-	NM_001008396	WDHD1	coding gene	Intermediate	Sharp	Sharp	Sharp	Sharp	Broad	Intermediate	Intermediate	Intermediate	Sharp	Intermediate	Intermediate	Sharp	Broad	Intermediate	Broad	Intermediate	Intermediate	Intermediate	Intermediate
chr5	54455983	54457483	+	NM_001008397	GPX8	coding gene	Non	Non	Non	Non	Non	Non	Non	Non	Non	Non	Non	Non	Non	Non	Non	Non	Non	Non	Non	Non
chr19	53935226	53936726	+	NM_001008401	ZNF761	coding gene	Sharp	Sharp	Sharp	Sharp	Sharp	Sharp	Sharp	Sharp	Sharp	Sharp	Sharp	Sharp	Sharp	Sharp	Sharp	Sharp	Sharp	Sharp	Sharp	Sharp
chr14	105046055	105047555	+	NM_001008404	C14orf180	coding gene	Non	Non	Non	Non	Non	Non	Non	Non	Non	Non	Non	Non	Non	Non	Non	Non	Non	Non	Non	Non
chr7	107221203	107222703	+	NM_001008405	BCAP29	coding gene	Sharp	Sharp	Sharp	Sharp	Sharp	Sharp	Sharp	Sharp	Sharp	Sharp	Sharp	Sharp	Sharp	Sharp	Sharp	Intermadiate	Sharp	Sharp	Sharp	Intermediate
chr20	30458504	30460004	+	NM_001008409	TTLL9	coding gene	Non	Non	Non	Sharp	Non	Sharp	Sharp	Sharp	Sharp	Sharp	Sharp	Sharp	Sharp	Non	Non	Sharp	Non	Non	Sharp	Non
chr2	119981383	119982883	+	NM_001008410	STEAP3	coding gene	Non	Non	Non	Sharp	Sharp	Non	Sharp	Sharp	Sharp	Sharp	Non	Sharp	Non	Non	Non	Sharp	Non	Non	Non	Non
chr3	125801634	125803134	-	NM_001008485	SLC41A3	coding gene	Sharp	Sharp	Sharp	Sharp	Sharp	Sharp	Sharp	Sharp	Sharp	Sharp	Sharp	Sharp	Sharp	Sharp	Sharp	Sharp	Sharp	Sharp	Sharp	Sharp
chr3	125801634	125803134	-	NM_001008486	SLC41A3	coding gene	Sharp	Sharp	Sharp	Sharp	Sharp	Sharp	Sharp	Sharp	Sharp	Sharp	Sharp	Sharp	Sharp	Sharp	Sharp	Sharp	Sharp	Sharp	Sharp	Sharp
chr3	125774118	125775618	-	NM_001008487	SLC41A3	coding gene	Non	Non	Non	Non	Non	Non	Non	Non	Non	Non	Non	Non	Non	Non	Non	Non	Non	Non	Non	Non
chr2	170550963	170552463	+	NM_001008489	PHOSPHO2	coding gene	Sharp	Sharp	Sharp	Sharp	Sharp	Sharp	Sharp	Sharp	Sharp	Sharp	Sharp	Sharp	Sharp	Sharp	Sharp	Sharp	Sharp	Sharp	Sharp	Sharp
chr2	242254722	242256222	+	NM_001008491	SEPTIN2	coding gene	Intermediate	Intermediate	Intermediate	Intermediate	Sharp	Broad	Intermediate	Broad	Intermediate	Intermediate	Intermediate	Intermediate	Sharp	Broad	Broad	Broad	Broad	Broad	Broad	Intermediate
chr2	242255280	242256780	+	NM_001008492	SEPTIN2	coding gene	Intermediate	Intermediate	Intermediate	Intermediate	Sharp	Broad	Intermediate	Broad	Intermediate	Intermediate	Intermediate	Intermediate	Sharp	Broad	Broad	Broad	Broad	Broad	Broad	Intermediate
chr1	225839345	225840845	-	NM_001008493	ENAH	coding gene	Sharp	Sharp	Sharp	Sharp	Sharp	Broad	Sharp	Sharp	Sharp	Sharp	Sharp	Sharp	Sharp	Sharp	Intermediate	Intermadiate	Sharp	Sharp	Sharp	Non
chr22	35462129	35463629	+	NM_001008494	None	coding gene	Non	Non	Non	Non	Non	Non	Non	Non	Non	Non	Non	Non	Non	Non	Non	Non	Non	Non	Non	Non
chr8	91656633	91658133	-	NM_001008495	TMEM64	coding gene	Sharp	Intermediate	Sharp	Intermediate	Sharp	Sharp	Sharp	Broad	Sharp	Sharp	Sharp	Sharp	Sharp	Non	Sharp	Non	Sharp	Sharp	Intermediate	Non
chr22	25169187	25170687	-	NM_001008496	PIWIL3	coding gene	Non	Non	Non	Non	Non	Non	Non	Non	Non	Non	Non	Non	Non	Non	Non	Non	Non	Non	Non	Non
chr6	154360442	154361942	+	NM_001008503	OPRM1	coding gene	Non	Non	Non	Non	Non	Non	Non	Non	Non	Non	Non	Non	Non	Non	Non	Non	Non	Non	Non	Non
chr6	154360442	154361942	+	NM_001008504	OPRM1	coding gene	Non	Non	Non	Non	Non	Non	Non	Non	Non	Non	Non	Non	Non	Non	Non	Non	Non	Non	Non	Non
chr6	154360442	154361942	+	NM_001008505	OPRM1	coding gene	Non	Non	Non	Non	Non	Non	Non	Non	Non	Non	Non	Non	Non	Non	Non	Non	Non	Non	Non	Non
chr17	74705556	74707056	-	NM_001008528	MXRA7	coding gene	Sharp	Sharp	Sharp	Sharp	Sharp	Sharp	Sharp	Sharp	Sharp	Sharp	Sharp	Sharp	Sharp	Sharp	Sharp	Sharp	Sharp	Sharp	Sharp	Sharp
chr17	74705556	74707056	-	NM_001008529	MXRA7	coding gene	Sharp	Sharp	Sharp	Sharp	Sharp	Sharp	Sharp	Sharp	Sharp	Sharp	Sharp	Sharp	Sharp	Sharp	Sharp	Sharp	Sharp	Sharp	Sharp	Sharp
chr14	93213547	93215047	-	NM_001008530	LGMN	coding gene	Sharp	Sharp	Sharp	Sharp	Non	Sharp	Sharp	Sharp	Sharp	Sharp	Sharp	Sharp	Non	Intermediate	Sharp	Sharp	Sharp	Sharp	Broad	Sharp
chrX	119029935	119031435	+	NM_001008534	AKAP14	coding gene	Non	Non	Non	Non	Non	Non	Non	Non	Non	Non	Non	Non	Non	Non	Non	Non	Non	Non	Non	Non
chrX	119029935	119031435	+	NM_001008535	AKAP14	coding gene	Non	Non	Non	Non	Non	Non	Non	Non	Non	Non	Non	Non	Non	Non	Non	Non	Non	Non	Non	Non
chr1	152060040	152061540	-	NM_001008536	TCHHL1	coding gene	Non	Non	Non	Non	Non	Non	Non	Non	Non	Non	Non	Non	Non	Non	Non	Non	Non	Non	Non	Non
chrX	74143787	74145287	-	NM_001008537	NEXMIF	coding gene	Non	Non	Sharp	Sharp	Sharp	Non	Sharp	Non	Sharp	Sharp	Sharp	Sharp	Sharp	Non	Sharp	Non	Sharp	Sharp	Intermediate	Sharp
chr8	17354596	17356096	+	NM_001008539	SLC7A2	coding gene	Non	Sharp	Non	Sharp	Non	Non	Sharp	Non	Sharp	Sharp	Non	Sharp	Non	Non	Non	Non	Non	Sharp	Non	Non
chr2	136872313	136873813	-	NM_001008540	CXCR4	coding gene	Broad	Broad	Broad	Broad	Broad	Broad	Broad	Broad	Broad	Broad	Broad	Broad	Non	Broad	Broad	Broad	Broad	Broad	Broad	Broad
chr10	111969988	111971488	+	NM_001008541	MXI1	coding gene	Broad	Broad	Broad	Broad	Non	Broad	Broad	Broad	Broad	Broad	Intermediate	Intermediate	Broad	Intermediate	Broad	Broad	Intermediate	Intermediate	Broad	Intermediate
chr9	132597756	132599256	+	NM_001008563	USP20	coding gene	Intermediate	Intermediate	Intermediate	Intermediate	Sharp	Intermediate	Intermediate	Intermediate	Broad	Broad	Broad	Broad	Sharp	Intermediate	Intermediate	Intermadiate	Broad	Sharp	Intermediate	Intermediate
chr13	25875665	25877165	+	NM_001008564	NUP58	coding gene	Sharp	Sharp	Sharp	Sharp	Sharp	Sharp	Sharp	Sharp	Sharp	Sharp	Sharp	Sharp	Sharp	Intermediate	Intermediate	Broad	Sharp	Sharp	Intermediate	Sharp
chr22	26959870	26961370	-	NM_001008566	TPST2	coding gene	Non	Non	Non	Non	Non	Non	Non	Non	Non	Non	Non	Non	Non	Non	Non	Non	Non	Non	Non	Non
chr5	149737201	149738701	+	NM_001008657	TCOF1	coding gene	Sharp	Sharp	Sharp	Sharp	Sharp	Sharp	Sharp	Sharp	Sharp	Sharp	Sharp	Sharp	Sharp	Intermediate	Sharp	Intermadiate	Sharp	Sharp	Sharp	Sharp
chr11	85778639	85780139	-	NM_001008660	PICALM	coding gene	Intermediate	Broad	Intermediate	Intermediate	Intermediate	Broad	Broad	Broad	Intermediate	Broad	Intermediate	Intermediate	Sharp	Intermediate	Intermediate	Broad	Intermediate	Intermediate	Intermediate	Broad
chr1	89457143	89458643	-	NM_001008661	KYAT3	coding gene	Sharp	Sharp	Sharp	Sharp	Sharp	Intermediate	Intermediate	Intermediate	Sharp	Sharp	Sharp	Intermediate	Sharp	Broad	Sharp	Broad	Sharp	Sharp	Intermediate	Sharp
chr1	89457143	89458643	-	NM_001008662	KYAT3	coding gene	Sharp	Sharp	Sharp	Sharp	Sharp	Intermediate	Intermediate	Intermediate	Sharp	Sharp	Sharp	Intermediate	Sharp	Broad	Sharp	Broad	Sharp	Sharp	Intermediate	Sharp
chr20	23585110	23586610	-	NM_001008693	CST9	coding gene	Non	Non	Non	Non	Non	Non	Non	Non	Non	Non	Non	Non	Non	Non	Non	Non	Non	Non	Non	Non
chr22	21354904	21356404	-	NM_001008695	THAP7	coding gene	Sharp	Sharp	Sharp	Sharp	Sharp	Intermediate	Intermediate	Intermediate	Sharp	Intermediate	Sharp	Intermediate	Sharp	Intermediate	Intermediate	Intermadiate	Intermediate	Intermediate	Intermediate	Intermediate
chr22	26906937	26908437	-	NM_001008697	TFIP11	coding gene	Sharp	Sharp	Sharp	Sharp	Sharp	Sharp	Sharp	Sharp	Sharp	Sharp	Sharp	Sharp	Sharp	Sharp	Intermediate	Intermadiate	Sharp	Sharp	Intermediate	Sharp
chr16	27325250	27326750	+	NM_001008699	None	coding gene	Sharp	Sharp	Intermediate	Sharp	Sharp	Sharp	Intermediate	Intermediate	Intermediate	Intermediate	Sharp	Intermediate	Sharp	Sharp	Sharp	Sharp	Sharp	Sharp	Sharp	Sharp
[truncated: 63,105 more rows]
