# Supplementary material for: Dynamics of broad H3K4me3 domains uncover an epigenetic switch between cell identity and cancer-related genes
Source: HighWire-hosted journal article supplement (doi:10.1101/gr.266924.120), 2021-06-23
Supplement: Supplemental_Table_S4.xlsx [file Supplemental_Table_S4.xlsx]

## Sheet: Summary
Supplemental Table S4. CRISPR-Cas9 Analysis from DepMap
	Summary:
	A.	Jurkat_essential
	B.	Jurkat_pref_essential
	C.	Preferentially with broad H3K4me3 domains

## Sheet: A. Jurkat_essential
MYB
RUNX1
KIF11
PHF5A
THOC5
RAN
RPL12
SF3A1
MRPL12
WDR77
DNM2
RPL37
AQR
NAA10
OGDH
HSPE1
LDB1
ATP1A1
IDH3A
ADSL
YARS2
SNRPD1
ATP6V1G1
EEF2
HMBS
CTPS1
MINOS1
PRMT5
SF3B1
RPL11
TYMS
CARS2
SSRP1
MASTL
RPL18A
SON
RPS15A
ACO2
EIF4A3
ATP1B3
HCFC1
RPL8
GATA3
CHCHD1
SNRNP200
EP400
POT1
NUTF2
RUVBL1
COX6A1
ACTB
POLE
LRPPRC
FECH
MRPL10
TUBB
ELOB
GPX4
RPS8
SMU1
DTYMK
PI4KA
RRM2
RPL38
POLR3K
HNRNPU
SNU13
DDX5
MRPL41
MRPL18
GINS2
WDR7
TOMM22
HIST1H2BC
DNMT1
RAE1
TUBA1B
MRPL55
NIP7
MRPS23
TIMM8A
PET117
MRPL43
TONSL
COA7
CEP192
FEN1
RPL28
HIST1H2BJ
BANF1
STRAP
GPN1
UBE2M
MYC
TRMT112
DPAGT1
NUP54
CDC5L
NOP16
DERL2
EIF2S1
PAICS
COX18
NOP53
SMARCB1
NDUFA4
RPS20
POLG
SNRPB
MAD2L1
EEF1A1
POLR2E
CPOX
RPL26
UBL5
HIST1H2AI
MRPS14
DHODH
MCM3
SF3A2
RRP9
PRPF19
TPR
PRPF38B
GABPA
PPP4C
BCLAF1
MLST8
SMC3
UMPS
RPS18
HAMP
RNGTT
SART3
SDHB
CFL1
CDCA8
SF3B3
CLTC
KPNB1
COX5A
MTBP
TTC27
PRPF38A
EXOSC7
CCT2
SAP18
RPL4
LAS1L
SMG1
AHCY
HIST2H2AC
RPL17
SARS
ZCRB1
POLA1
RPS3A
HIST1H2BM
DDX19A
FAM50A
DKC1
CRLS1
RCC1L
CTCF
RPL7A
PRPF8
E2F6
RPL27A
PUF60
SNRNP70
CHEK1
RPS13
ABCG1
NOC4L
MST1
SDHA
MRPS11
POLR3A
POLR3H
PPP1R10
EIF3F
HTATSF1
MARS2
PRPF6
RPL37A
BUD31
TPT1
SMC4
RSL1D1
EIF6
SRSF1
POLR2K
TAF6
CHMP2A
ZC3H18
PGK1
RPS19BP1
CHERP
CCT4
POLR1A
RPS27A
SDHD
THOC1
COX6C
DDB1
PPP1R7
OSGEP
SLC25A3
PDRG1
SNRPG
PDCD11
ATP6V1A
SMG6
RPL23A
RPS10
PELO
PPP1R15B
PSMA7
POLR2G
IMPDH2
RPS29
ATP5ME
PSMD12
GGPS1
C1orf109
POLR2L
SNRPA1
RPS2
SF1
ABCE1
TSR2
PAK1IP1
TPI1
POLD1
PSMG4
HNRNPK
ZNF674
NSF
SNAPC5
PGAM1
SNRPE
PCNA
PRELID3B
PHF12
BIRC5
MRPS24
CHMP5
YPEL5
SUPT6H
SSU72
HMGCR
PSMC6
RARS2
RANGAP1
SARS2
USP36
CYC1
MIS18BP1
ISG20L2
PTPN23
ZNF559
RPL3
SRSF2
ARGFX
USP5
PSMD2
HEATR1
CUL1
MRPS6
TOMM20
RACK1
PSTK
PSMD7
UQCRFS1
MRPL35
MBTPS1
VIRMA
THAP1
ATF4
ATP6V1E1
PSMB4
TBCA
COQ4
MOG
CRNKL1
NFS1
IPO7
KARS
VCP
CACTIN
TARS
MRPS22
YRDC
CHMP4B
DDX49
HIST2H3D
CDC23
EARS2
SNRPC
SRSF7
RRN3
NCAPG2
VPS25
RPL7
RPL32
RRP12
PHB2
POLR3B
RPL13A
CNIH4
HJURP
FARSB
PSMB1
SEH1L
HAUS5
PELP1
IARS2
CKAP5
RNPC3
RPS6
PLRG1
ARGLU1
NRF1
ESS2
CHAF1A
CPSF4
LETM1
RBM25
NCAPH
RPL6
ATP5F1E
RPS24
CEBPZ
GPN2
WDR55
NEDD1
DDX23
HIST1H2BL
TOP3A
CDC45
NEDD8
UBE2N
RPS9
RPLP2
KAT5
MVD
NRDE2
MYB
RUNX2
KIF12
PHF5A
THOC6
RAN
RPL13
SF3A2
MRPL13
WDR78
DNM3
RPL38
AQR
NAA11
OGDH
HSPE2
LDB2
ATP1A2
IDH3A
ADSL
YARS3
SNRPD2
ATP6V1G2
EEF3
HMBS
CTPS2
MINOS2
PRMT6
SF3B2
RPL12
TYMS
CARS3
SSRP2
MASTL
RPL18A
SON
RPS15A
ACO3
EIF4A4
ATP1B4
HCFC2
RPL9
GATA4
CHCHD2
SNRNP201
EP401
POT2
NUTF3
RUVBL2
COX6A2
ACTB
POLE
LRPPRC
FECH
MRPL11
TUBB
ELOB
GPX5
RPS9
SMU2
DTYMK
PI4KA
RRM3
RPL39
POLR3K
HNRNPU
SNU14
DDX6
MRPL5
MRPL28
GINS3
WDR8
TOMM23
HIST1H2BC
DNMT2
RAE2
TUBA1B
MRPL56
NIP8
MRPS24
TIMM8A
PET118
MRPL44
TONSL
COA8
CEP193
FEN2
RPL29
HIST1H2BJ
BANF2
STRAP
GPN2
UBE2M
MYC
TRMT113
DPAGT2
NUP55
CDC5L
NOP17
DERL3
EIF2S2
PAICS
COX19
NOP54
SMARCB2
NDUFA5
RPS21
POLG
SNRPB
MAD2L2
EEF1A2
POLR2E
CPOX
RPL27
UBL6
HIST1H2AI
MRPS15
DHODH
MCM4
SF3A3
RRP10
PRPF20
TPR
PRPF38B
GABPA
PPP4C
BCLAF2
MLST9
SMC4
UMPS
RPS19
HAMP
RNGTT
SART4
SDHB
CFL2
CDCA9
SF3B4
CLTC
KPNB2
COX5A
MTBP
TTC28
PRPF38A
EXOSC8
CCT3
SAP19
RPL5
LAS1L
SMG2
AHCY
HIST2H2AC
RPL18
SARS
ZCRB2
POLA2
RPS3A
HIST1H2BM
DDX19A
FAM50A
DKC2
CRLS2
RCC1L
CTCF
RPL7A
PRPF9
E2F7
RPL27A
PUF61
SNRNP71
CHEK2
RPS14
ABCG2
NOC4L
MST2
SDHA
MRPS12
POLR3A
POLR3H
PPP1R11
EIF3F
HTATSF2
MARS3
PRPF7
RPL37A
BUD32
TPT2
SMC5
RSL1D2
EIF7
SRSF2
POLR2K
TAF7
CHMP2A
ZC3H19
PGK2
RPS19BP2
CHERP
CCT5
POLR1A
RPS27A
SDHD
THOC2
COX6C
DDB2
PPP1R8
OSGEP
SLC25A4
PDRG2
SNRPG
PDCD12
ATP6V1A
SMG7
RPL23A
RPS11
PELO
PPP1R15B
PSMA8
POLR2G
IMPDH3
RPS30
ATP5ME
PSMD13
GGPS2
C1orf110
POLR2L
SNRPA2
RPS3
SF2
ABCE2
TSR3
PAK1IP2
TPI2
POLD2
PSMG5
HNRNPK
ZNF675
NSF
SNAPC6
PGAM2
SNRPE
PCNA
PRELID3B
PHF13
BIRC6
MRPS25
CHMP6
YPEL6
SUPT6H
SSU73
HMGCR
PSMC7
RARS3
RANGAP2
SARS3
USP37
CYC2
MIS18BP2
ISG20L3
PTPN24
ZNF560
RPL4
SRSF3
ARGFX
USP6
PSMD3
HEATR2
CUL2
MRPS7
TOMM21
RACK2
PSTK
PSMD8
UQCRFS2
MRPL36
MBTPS2
VIRMA
THAP2
ATF5
ATP6V1E2
PSMB5
TBCA
COQ5
MOG
CRNKL2
NFS2
IPO8
KARS
VCP
CACTIN
TARS
MRPS23
YRDC
CHMP4B
DDX50
HIST2H3D
CDC24
EARS3
SNRPC
SRSF8
RRN4
NCAPG3
VPS26
RPL57
RPL82
RRP13
PHB3
POLR3B
RPL13A
CNIH5
HJURP
FARSB
PSMB2
SEH1L
HAUS6
PELP2
IARS3
CKAP6
RNPC4
RPS7
PLRG2
ARGLU2
NRF2
ESS3
CHAF1A
CPSF5
LETM2
RBM26
NCAPH
RPL7
ATP5F1E
RPS25
CEBPZ
GPN3
WDR56
NEDD2
DDX24
HIST1H2BL
TOP3A
CDC46
NEDD9
UBE2N
RPS10
RPLP3
KAT6
MVD
NRDE3
MYB
RUNX3
KIF13
PHF5A
THOC7
RAN
RPL14
SF3A3
MRPL14
WDR79
DNM4
RPL39
AQR
NAA12
OGDH
HSPE3
LDB3
ATP1A3
IDH3A
ADSL
YARS4
SNRPD3
ATP6V1G3
EEF4
HMBS
CTPS3
MINOS3
PRMT7
SF3B3
RPL13
TYMS
CARS4
SSRP3
MASTL
RPL18A
SON
RPS15A
ACO4
EIF4A5
ATP1B5
HCFC3
RPL10
GATA5
CHCHD3
SNRNP202
EP402
POT3
NUTF4
RUVBL3
COX6A3
ACTB
POLE
LRPPRC
FECH
MRPL12
TUBB
ELOB
GPX6
RPS10
SMU3
DTYMK
PI4KA
RRM4
RPL40
POLR3K
HNRNPU
SNU15
DDX7
MRPL51
MRPL74
GINS4
WDR9
TOMM24
HIST1H2BC
DNMT3
RAE3
TUBA1B
MRPL57
NIP9
MRPS25
TIMM8A
PET119
MRPL45
TONSL
COA9
CEP194
FEN3
RPL30
HIST1H2BJ
BANF3
STRAP
GPN3
UBE2M
MYC
TRMT114
DPAGT3
NUP56
CDC5L
NOP18
DERL4
EIF2S3
PAICS
COX20
NOP55
SMARCB3
NDUFA6
RPS22
POLG
SNRPB
MAD2L3
EEF1A3
POLR2E
CPOX
RPL28
UBL7
HIST1H2AI
MRPS16
DHODH
MCM5
SF3A4
RRP11
PRPF21
TPR
PRPF38B
GABPA
PPP4C
BCLAF3
MLST10
SMC5
UMPS
RPS20
HAMP
RNGTT
SART5
SDHB
CFL3
CDCA10
SF3B5
CLTC
KPNB3
COX5A
MTBP
TTC29
PRPF38A
EXOSC9
CCT4
SAP20
RPL6
LAS1L
SMG3
AHCY
HIST2H2AC
RPL19
SARS
ZCRB3
POLA3
RPS3A
HIST1H2BM
DDX19A
FAM50A
DKC3
CRLS3
RCC1L
CTCF
RPL7A
PRPF10
E2F8
RPL27A
PUF62
SNRNP72
CHEK3
RPS15
ABCG3
NOC4L
MST3
SDHA
MRPS13
POLR3A
POLR3H
PPP1R12
EIF3F
HTATSF3
MARS4
PRPF8
RPL37A
BUD33
TPT3
SMC6
RSL1D3
EIF8
SRSF3
POLR2K
TAF8
CHMP2A
ZC3H20
PGK3
RPS19BP3
CHERP
CCT6
POLR1A
RPS27A
SDHD
THOC3
COX6C
DDB3
PPP1R9
OSGEP
SLC25A5
PDRG3
SNRPG
PDCD13
ATP6V1A
SMG8
RPL23A
RPS12
PELO
PPP1R15B
PSMA9
POLR2G
IMPDH4
RPS31
ATP5ME
PSMD14
GGPS3
C1orf111
POLR2L
SNRPA3
RPS4
SF3
ABCE3
TSR4
PAK1IP3
TPI3
POLD3
PSMG6
HNRNPK
ZNF676
NSF
SNAPC7
PGAM3
SNRPE
PCNA
PRELID3B
PHF14
BIRC7
MRPS26
CHMP7
YPEL7
SUPT6H
SSU74

## Sheet: B. Jurkat_pref_essential
MYB
RUNX1
KIF11
PHF5A
THOC5
RAN
RPL12
SF3A1
MRPL12
WDR77
DNM2
RPL37
AQR
NAA10
OGDH
HSPE1
LDB1
ATP1A1
IDH3A
ADSL
YARS2
SNRPD1
ATP6V1G1
EEF2
HMBS
CTPS1
MINOS1
PRMT5
SF3B1
RPL11
TYMS
CARS2
SSRP1
MASTL
RPL18A
SON
RPS15A
ACO2
EIF4A3
ATP1B3
HCFC1
RPL8
GATA3
CHCHD1
SNRNP200
EP400
POT1
NUTF2
RUVBL1
COX6A1
ACTB
POLE
LRPPRC
FECH
MRPL10
TUBB
ELOB
GPX4
RPS8
SMU1
DTYMK
PI4KA
RRM2
RPL38
POLR3K
HNRNPU
SNU13
DDX5
MRPL41
MRPL18
GINS2
WDR7
TOMM22
HIST1H2BC
DNMT1
RAE1
TUBA1B
MRPL55
NIP7
MRPS23
TIMM8A
PET117
MRPL43
TONSL
COA7
CEP192
FEN1
RPL28
HIST1H2BJ
BANF1
STRAP
GPN1
UBE2M
MYC
TRMT112
DPAGT1
NUP54
CDC5L
NOP16
DERL2
EIF2S1
PAICS
COX18
NOP53
SMARCB1
NDUFA4
RPS20
POLG
SNRPB
MAD2L1
EEF1A1
POLR2E
CPOX
RPL26
UBL5
HIST1H2AI
MRPS14
DHODH
MCM3
SF3A2
RRP9
PRPF19
TPR
PRPF38B
GABPA
PPP4C
BCLAF1
MLST8
SMC3
UMPS
RPS18
HAMP
RNGTT
SART3
SDHB
CFL1
CDCA8
SF3B3
CLTC
KPNB1
COX5A
MTBP
TTC27
PRPF38A
EXOSC7
CCT2
SAP18
RPL4
LAS1L
SMG1
AHCY
HIST2H2AC
RPL17
SARS
ZCRB1
POLA1
RPS3A
HIST1H2BM
DDX19A
FAM50A
DKC1
CRLS1
RCC1L
CTCF
RPL7A
PRPF8
E2F6
RPL27A
PUF60
SNRNP70
CHEK1
RPS13
ABCG1
NOC4L
MST1
SDHA
MRPS11
POLR3A
POLR3H
PPP1R10
EIF3F
HTATSF1
MARS2
PRPF6
RPL37A
BUD31
TPT1
SMC4
RSL1D1
EIF6
SRSF1
POLR2K
TAF6
CHMP2A
ZC3H18
PGK1
RPS19BP1
CHERP
CCT4
POLR1A
RPS27A
SDHD
THOC1
COX6C
DDB1
PPP1R7
OSGEP
SLC25A3
PDRG1
SNRPG
PDCD11
ATP6V1A
SMG6
RPL23A
RPS10
PELO
PPP1R15B
PSMA7
POLR2G
IMPDH2
RPS29
ATP5ME
PSMD12
GGPS1
C1orf109
POLR2L
SNRPA1
RPS2
SF1
ABCE1
TSR2
PAK1IP1
TPI1
POLD1
PSMG4

## Sheet: C. Preferentially with broad
RPL26
POLR2L
MRPL18
EEF2
DDX5
GATA3
PPP1R15B
BUD31
CFL1
KIF11
SON
RPL28
RRM2
POLG
PSMA7
HSPE1
MASTL
RUNX1
SMC4
HCFC1
ACTB
SSRP1
PRPF6
PAICS
SF3A2
GGPS1
ABCE1
SART3
LDB1
TYMS
MYC
HNRNPU
CTCF
EEF1A1
C1orf109
PGK1
MYB
CDCA8
