# Supplementary material for: Dynamics of broad H3K4me3 domains uncover an epigenetic switch between cell identity and cancer-related genes
Source: HighWire-hosted journal article supplement (doi:10.1101/gr.266924.120), 2021-06-23
Supplement: Supplemental_Table_S5.xlsx [file Supplemental_Table_S5.xlsx]

## Sheet: Summary
Supplemental Table S5. Overlap between broad H3K4me3 domains and cancer-related genes
	Summary:
	A.	Oncogenes in T-ALL
	B.	Tumor suppresors in T-ALL

## Sheet: A. oncogenes
Gene name	Pathway	Broad overlap	Type of genetic or epigenetic aberration	source
ABL1	Signaling	Broad only in T-ALL	upregulation	Girardi et al.2017. Blood review. 129(9):1113-1123
AKT1	Signaling	No Broad	activating mutations	Girardi et al.2017. Blood review. 129(9):1113-1123
ANRIL	LncRNA	Broad only in T-ALL	upregulated	Gao et al. 2020. Journal of Cancer; 11(14): 4284-4296
ARIEL	LncRNA	No Broad	upregulated	Gao et al. 2020. Journal of Cancer; 11(14): 4284-4296
BALR-2	LncRNA	Broad shared	upregulated	Gao et al. 2020. Journal of Cancer; 11(14): 4284-4296
BARHL1	NKL genes	No Broad	upregulation	Villarese et al. 2017.Leukemia; 32(1):61-71
BARX2	NKL genes	No Broad	upregulation	Villarese et al. 2017.Leukemia; 32(1):61-71
BMI1	others genes	Broad only in T-ALL	upregulation	Peng et al. BMC Cancer 2017. 17, 76,
CALM1(-MLLT10)	Transcription	Broad only in T-ALL	fusion transcript (resulting upregulation HOXA genes)	Girardi et al.2017. Blood review. 129(9):1113-1123
CD59	others genes	Broad only in T-ALL	upregulation	Jia et al. 2019. Cancer Cell Inter. 19, 9
DLX4	NKL genes	No Broad	upregulation	Villarese et al. 2017.Leukemia; 32(1):61-71
EMX2	NKL genes	No Broad	upregulation	Villarese et al. 2017.Leukemia; 32(1):61-71
FLT3	Signaling	No Broad	activating mutations	Girardi et al.2017. Blood review. 129(9):1113-1123
HHEX	NKL genes	Broad only in T-ALL	upregulation	Villarese et al. 2017.Leukemia; 32(1):61-71
HLX	NKL genes	Broad only in T-ALL	upregulation	Villarese et al. 2017.Leukemia; 32(1):61-71
HMX3	NKL genes	No Broad	upregulation	Villarese et al. 2017.Leukemia; 32(1):61-71
HOTAIR	LncRNA	No Broad	upregulated	Gao et al. 2020. Journal of Cancer; 11(14): 4284-4296
HOTTIP	LncRNA	Broad only in T-ALL	upregulated	Gao et al. 2020. Journal of Cancer; 11(14): 4284-4296
HOXA-AS2	LncRNA	No Broad	upregulated	Gao et al. 2020. Journal of Cancer; 11(14): 4284-4296
HOXA10	Transcription	Broad only in T-ALL	upregulation	Soulier et al. 2005. Blood.106:274-286
HOXA11	Transcription	Broad only in T-ALL	upregulation	Soulier et al. 2005. Blood.106:274-286
HOXA13	Transcription	Broad only in T-ALL	upregulation	Soulier et al. 2005. Blood.106:274-286
HOXA3	Transcription	No Broad	upregulation	Soulier et al. 2005. Blood.106:274-286
HOXA4	Transcription	No Broad	upregulation	Soulier et al. 2005. Blood.106:274-286
HOXA5	Transcription	Broad only in T-ALL	upregulation	Soulier et al. 2005. Blood.106:274-286
HOXA6	Transcription	Broad only in T-ALL	upregulation	Soulier et al. 2005. Blood.106:274-286
HOXA7	Transcription	Broad only in T-ALL	upregulation	Soulier et al. 2005. Blood.106:274-286
HOXA9	Transcription	Broad only in T-ALL	upregulation	Soulier et al. 2005. Blood.106:274-286
IL7R	Signaling	Broad shared	activating mutations	Girardi et al.2017. Blood review. 129(9):1113-1123
JAK1	Signaling	Broad shared	activating mutations	Girardi et al.2017. Blood review. 129(9):1113-1123
JAK3	Signaling	No Broad	activating mutations	Girardi et al.2017. Blood review. 129(9):1113-1123
JDP2	others genes	Broad only in T-ALL	upregulation	Mansour et al. 2015. JEM. 215, 1929-1945
KMT2A/MLL(-ENL)	Transcription	Broad shared	fusion transcript (resulting upregulation HOXA genes)	Girardi et al.2017. Blood review. 129(9):1113-1123
KRAS	Signaling	No Broad	activating mutations	Girardi et al.2017. Blood review. 129(9):1113-1123
LBX2	NKL genes	No Broad	upregulation	Villarese et al. 2017.Leukemia; 32(1):61-71
LCK	others genes	Broad shared	upregulation	Serafin et al. Blood 2017. 130, 2750-2761
LMO1	Transcription	Broad only in T-ALL	Ectopic expression	Girardi et al.2017. Blood review. 129(9):1113-1123
LMO2	Transcription	Broad only in T-ALL	Ectopic expression	Girardi et al.2017. Blood review. 129(9):1113-1123
Lnc-INSR	LncRNA	No Broad	upregulated	Gao et al. 2020. Journal of Cancer; 11(14): 4284-4296
LOC339862	LncRNA	No Broad	upregulated	Gao et al. 2020. Journal of Cancer; 11(14): 4284-4296
LUNAR1	LncRNA	Broad only in T-ALL	upregulated	Gao et al. 2020. Journal of Cancer; 11(14): 4284-4296
LYL1	others genes	Broad only in T-ALL	upregulation	Girardi et al.2017. Blood review. 129(9):1113-1123
MEF2C	Transcription	Broad only in T-ALL	upregulation	Girardi et al.2017. Blood review. 129(9):1113-1123
MLLT10	Transcription	Broad only in T-ALL	fusion transcript (resulting upregulation HOXA genes)	Girardi et al.2017. Blood review. 129(9):1113-1123
MSX2	NKL genes	No Broad	upregulation	Villarese et al. 2017.Leukemia; 32(1):61-71
MTOR	Translation	No Broad	activating mutations	Girardi et al.2017. Blood review. 129(9):1113-1123
MYB	Transcription	Broad shared	Ectopic expression	Girardi et al.2017. Blood review. 129(9):1113-1123
MYC	others genes	Broad shared	upregulation	Girardi et al.2017. Blood review. 129(9):1113-1123
NALT1	LncRNA	Broad only in T-ALL	upregulated	Gao et al. 2020. Journal of Cancer; 11(14): 4284-4296
NANOG	NKL genes	No Broad	upregulation	Villarese et al. 2017.Leukemia; 32(1):61-71
NEAT1	LncRNA	Broad only in T-ALL	upregulated	Gao et al. 2020. Journal of Cancer; 11(14): 4284-4296
NKX2.1	NKL genes	No Broad	upregulation	Villarese et al. 2017.Leukemia; 32(1):61-71
NKX2.2	NKL genes	No Broad	upregulation	Villarese et al. 2017.Leukemia; 32(1):61-71
NKX2.3	NKL genes	No Broad	upregulation	Villarese et al. 2017.Leukemia; 32(1):61-71
NKX2.4	NKL genes	No Broad	upregulation	Villarese et al. 2017.Leukemia; 32(1):61-71
NKX2.5	NKL genes	Broad only in T-ALL	upregulation	Villarese et al. 2017.Leukemia; 32(1):61-71
NKX3.1	NKL genes	Broad only in T-ALL	upregulation	Villarese et al. 2017.Leukemia; 32(1):61-71
NKX3.2	NKL genes	Broad only in T-ALL	upregulation	Villarese et al. 2017.Leukemia; 32(1):61-71
NKX6.2	NKL genes	No Broad	upregulation	Villarese et al. 2017.Leukemia; 32(1):61-71
NOTCH1	NOTCH1 signaling pathway	Broad only in T-ALL	activating mutation	Girardi et al.2017. Blood review. 129(9):1113-1123
NRAS	Signaling	No Broad	activating mutations	Girardi et al.2017. Blood review. 129(9):1113-1123
NUP214-ABL1/ ABL1 gain	Signaling	No Broad	upregulation	Girardi et al.2017. Blood review. 129(9):1113-1123
PIK3CA	Signaling	Broad only in T-ALL	activating mutations	Girardi et al.2017. Blood review. 129(9):1113-1123
PVT1	LncRNA	Broad only in T-ALL	upregulated	Gao et al. 2020. Journal of Cancer; 11(14): 4284-4296
RP11-137H2.4	LncRNA	Broad shared	upregulated	Gao et al. 2020. Journal of Cancer; 11(14): 4284-4296
SET(-NUP214)	Transcription	Broad only in T-ALL	fusion transcript (resulting upregulation HOXA genes)	Girardi et al.2017. Blood review. 129(9):1113-1123
SNHG16	LncRNA	Broad only in T-ALL	upregulated	Gao et al. 2020. Journal of Cancer; 11(14): 4284-4296
SPI1	Transcription	Broad only in T-ALL	Ectopic expression of SPI1 driven by BCL11B	Girardi et al.2017. Blood review. 129(9):1113-1123
STAT5B	Signaling	Broad only in T-ALL	activating mutations	Girardi et al.2017. Blood review. 129(9):1113-1123
T-ALL-R-LncR1	LncRNA	Broad shared	upregulated	Gao et al. 2020. Journal of Cancer; 11(14): 4284-4296
TAL1	Transcription	Broad only in T-ALL	upregulation	Girardi et al.2017. Blood review. 129(9):1113-1123
TLX1	Transcription	Broad only in T-ALL	upregulation	Girardi et al.2017. Blood review. 129(9):1113-1123
TLX2	NKL genes	No Broad	upregulation	Villarese et al. 2017.Leukemia; 32(1):61-71
TLX3	Transcription	Broad only in T-ALL	upregulation	Girardi et al.2017. Blood review. 129(9):1113-1123
VENTX	NKL genes	No Broad	upregulation	Villarese et al. 2017.Leukemia; 32(1):61-71
ZEB1-AS1	LncRNA	Broad shared	upregulated	Gao et al. 2020. Journal of Cancer; 11(14): 4284-4296

## Sheet: B. Tumor suppressor
Gene	BH4D overlap	Driver mutation (Liu et al. 2017. Nat. Genet. 49(8):1211-1218)	Other types of genetic or epigenetic aberration	source
ARID1A	BH4D shared	y		Liu et al. 2017. Nat. Genet. 49(8):1211-1220
ASXL1	BH4D only in T-ALL	y		Liu et al. 2017. Nat. Genet. 49(8):1211-1221
ASXL2	No BH4D	y		Liu et al. 2017. Nat. Genet. 49(8):1211-1222
ATM	BH4D shared	y		Liu et al. 2017. Nat. Genet. 49(8):1211-1223
B2M	BH4D shared	y		Liu et al. 2017. Nat. Genet. 49(8):1211-1224
BAZ1A	BH4D only in T-ALL	y		Liu et al. 2017. Nat. Genet. 49(8):1211-1225
BCL11B	BH4D shared	y	Inactivating mutations/deletions	Girardi et al.2017. Blood review. 129(9):1113-1123
BCL2L11	BH4D shared		downregulation	Reynolds et al. Leukemia 2014. 28, 1819-1827
BCOR	BH4D shared	y		Liu et al. 2017. Nat. Genet. 49(8):1211-1227
BCORL1	No BH4D	y		Liu et al. 2017. Nat. Genet. 49(8):1211-1228
BRAF	BH4D only in T-ALL	y		Liu et al. 2017. Nat. Genet. 49(8):1211-1229
BRCA2	No BH4D	y		Liu et al. 2017. Nat. Genet. 49(8):1211-1230
CASC15	BH4D shared		downregulated	Gao et al. 2020. Journal of Cancer; 11(14): 4284-4296
CCND2	BH4D shared	y		Liu et al. 2017. Nat. Genet. 49(8):1211-1231
CCND3	BH4D shared	y		Liu et al. 2017. Nat. Genet. 49(8):1211-1232
CDKN1B	BH4D shared	y		Liu et al. 2017. Nat. Genet. 49(8):1211-1233
CDKN2A	BH4D only in T-ALL	y	deletion	Girardi et al.2017. Blood review. 129(9):1113-1123
CDKN2B	BH4D only in T-ALL	y	deletion	Girardi et al.2017. Blood review. 129(9):1113-1123
CDKN2C	BH4D shared	y		Liu et al. 2017. Nat. Genet. 49(8):1211-1236
CNOT3	BH4D only in T-ALL	y	Missense mutations	Girardi et al.2017. Blood review. 129(9):1113-1123
CREBBP	BH4D only in T-ALL	y		Liu et al. 2017. Nat. Genet. 49(8):1211-1238
CSDE1	BH4D only in T-ALL	y		Liu et al. 2017. Nat. Genet. 49(8):1211-1239
CTCF	BH4D shared	y		Liu et al. 2017. Nat. Genet. 49(8):1211-1240
DDX3X	BH4D shared	y		Liu et al. 2017. Nat. Genet. 49(8):1211-1241
DHX15	BH4D only in T-ALL	y		Liu et al. 2017. Nat. Genet. 49(8):1211-1242
DNM2	No BH4D	y	Inactivating mutations	Girardi et al.2017. Blood review. 129(9):1113-1123
DNMT3A	No BH4D	y	Inactivating mutations	Girardi et al.2017. Blood review. 129(9):1113-1123
EED	BH4D only in T-ALL	y	Inactivating mutations/deletions	Girardi et al.2017. Blood review. 129(9):1113-1123
EP300	BH4D shared	y		Liu et al. 2017. Nat. Genet. 49(8):1211-1246
ERG	No BH4D	y		Liu et al. 2017. Nat. Genet. 49(8):1211-1247
ETV6	BH4D shared	y	Inactivating mutations/deletions	Girardi et al.2017. Blood review. 129(9):1113-1123
EWSR1	BH4D shared	y		Liu et al. 2017. Nat. Genet. 49(8):1211-1249
EZH2	BH4D only in T-ALL	y	Inactivating mutations/deletions	Girardi et al.2017. Blood review. 129(9):1113-1123
FAT1	BH4D only in T-ALL	y		Liu et al. 2017. Nat. Genet. 49(8):1211-1251
FBXO28	No BH4D	y		Liu et al. 2017. Nat. Genet. 49(8):1211-1252
FBXW7	BH4D only in T-ALL	y	inactivating mutation	Girardi et al.2017. Blood review. 129(9):1113-1123
GAS5	BH4D only in T-ALL		downregulated	Gao et al. 2020. Journal of Cancer; 11(14): 4284-4296
GATA2	No BH4D	y		Liu et al. 2017. Nat. Genet. 49(8):1211-1255
GATA3	BH4D shared	y	Inactivating mutations/deletions	Girardi et al.2017. Blood review. 129(9):1113-1123
GNB1	BH4D shared	y		Liu et al. 2017. Nat. Genet. 49(8):1211-1257
HUWE1	BH4D shared	y		Liu et al. 2017. Nat. Genet. 49(8):1211-1258
IDH2	BH4D shared	y		Liu et al. 2017. Nat. Genet. 49(8):1211-1259
IKZF1	BH4D shared	y		Liu et al. 2017. Nat. Genet. 49(8):1211-1260
JAK2	BH4D only in T-ALL	y		Liu et al. 2017. Nat. Genet. 49(8):1211-1263
KDM6A/UTX	BH4D only in T-ALL	y	Inactivating mutations/deletions	Girardi et al.2017. Blood review. 129(9):1113-1123
KIT	No BH4D	y		Liu et al. 2017. Nat. Genet. 49(8):1211-1266
KMT2C	BH4D shared	y		Liu et al. 2017. Nat. Genet. 49(8):1211-1268
KMT2D	BH4D only in T-ALL	y		Liu et al. 2017. Nat. Genet. 49(8):1211-1269
LEF1	BH4D shared	y	Inactivating mutations/deletions	Girardi et al.2017. Blood review. 129(9):1113-1123
LETM1	BH4D shared	y		Liu et al. 2017. Nat. Genet. 49(8):1211-1272
Linc-PINT	BH4D only in T-ALL		downregulated	Gao et al. 2020. Journal of Cancer; 11(14): 4284-4296
MED12	No BH4D	y		Liu et al. 2017. Nat. Genet. 49(8):1211-1273
MGA	BH4D only in T-ALL	y		Liu et al. 2017. Nat. Genet. 49(8):1211-1274
MSH6	BH4D only in T-ALL	y		Liu et al. 2017. Nat. Genet. 49(8):1211-1275
MYCN	BH4D shared	y		Liu et al. 2017. Nat. Genet. 49(8):1211-1278
NCOR1	BH4D shared	y		Liu et al. 2017. Nat. Genet. 49(8):1211-1279
NF1	No BH4D	y	deletions	Girardi et al.2017. Blood review. 129(9):1113-1123
NOTCH3	BH4D shared	y		Liu et al. 2017. Nat. Genet. 49(8):1211-1282
ORAI1	BH4D only in T-ALL	y		Liu et al. 2017. Nat. Genet. 49(8):1211-1284
PBRM1	No BH4D	y		Liu et al. 2017. Nat. Genet. 49(8):1211-1285
PDCD4	BH4D shared		downregulation	Junker et al. 2015. Blood. 126, 993-1004
PHF6	BH4D only in T-ALL	y	Inactivating mutations/deletions	Girardi et al.2017. Blood review. 129(9):1113-1123
PHIP	BH4D shared	y		Liu et al. 2017. Nat. Genet. 49(8):1211-1287
PIK3CD	BH4D shared	y		Liu et al. 2017. Nat. Genet. 49(8):1211-1289
PIK3R1	BH4D shared	y		Liu et al. 2017. Nat. Genet. 49(8):1211-1290
PTEN	BH4D shared	y	Inactivating mutations/deletions	Girardi et al.2017. Blood review. 129(9):1113-1123
PTPN11	No BH4D	y		Liu et al. 2017. Nat. Genet. 49(8):1211-1292
PTPN2	BH4D shared		Inactivating mutations/deletions	Girardi et al.2017. Blood review. 129(9):1113-1123
PTPRC	BH4D shared	y		Liu et al. 2017. Nat. Genet. 49(8):1211-1293
RAD21	BH4D only in T-ALL	y		Liu et al. 2017. Nat. Genet. 49(8):1211-1294
RB1	BH4D only in T-ALL	y	deletion	Girardi et al.2017. Blood review. 129(9):1113-1123
RPL10	No BH4D	y	inactivating mutations	Girardi et al.2017. Blood review. 129(9):1113-1123
RPL22	No BH4D	y	inactivating mutations	Girardi et al.2017. Blood review. 129(9):1113-1123
RPL5	BH4D only in T-ALL	y	inactivating mutations	Girardi et al.2017. Blood review. 129(9):1113-1123
RUNX1	BH4D shared	y	Inactivating mutations/deletions	Girardi et al.2017. Blood review. 129(9):1113-1123
SETD2	BH4D only in T-ALL	y		Liu et al. 2017. Nat. Genet. 49(8):1211-1300
SF3B1	BH4D shared	y		Liu et al. 2017. Nat. Genet. 49(8):1211-1301
SH2B3	BH4D only in T-ALL	y		Liu et al. 2017. Nat. Genet. 49(8):1211-1302
SMARCA4	BH4D shared	y		Liu et al. 2017. Nat. Genet. 49(8):1211-1303
SMC3	BH4D only in T-ALL	y		Liu et al. 2017. Nat. Genet. 49(8):1211-1304
SP140L	BH4D only in T-ALL	y		Liu et al. 2017. Nat. Genet. 49(8):1211-1305
STAG2	BH4D shared	y		Liu et al. 2017. Nat. Genet. 49(8):1211-1306
SUZ12	BH4D only in T-ALL	y	Inactivating mutations/deletions	Girardi et al.2017. Blood review. 129(9):1113-1123
TBL1XR1	BH4D shared	y		Liu et al. 2017. Nat. Genet. 49(8):1211-1309
TP53	BH4D shared	y	mutation/deletion	Richter-Pechańska et al. Blood Cancer 2017. 7, e523
TRRAP	No BH4D	y		Liu et al. 2017. Nat. Genet. 49(8):1211-1311
TSPYL2	No BH4D	y		Liu et al. 2017. Nat. Genet. 49(8):1211-1312
U2AF1	BH4D only in T-ALL	y		Liu et al. 2017. Nat. Genet. 49(8):1211-1313
UBE2I	BH4D only in T-ALL	y		Liu et al. 2017. Nat. Genet. 49(8):1211-1314
USP7	BH4D shared	y		Liu et al. 2017. Nat. Genet. 49(8):1211-1315
USP9X	BH4D shared	y		Liu et al. 2017. Nat. Genet. 49(8):1211-1316
UTY	BH4D only in T-ALL	y		Liu et al. 2017. Nat. Genet. 49(8):1211-1317
WHSC1 (NSD2)	BH4D shared	y		Liu et al. 2017. Nat. Genet. 49(8):1211-1318
WT1	BH4D only in T-ALL	y	Inactivating mutations/deletions	Girardi et al.2017. Blood review. 129(9):1113-1123
XLOC_001561	No BH4D		downregulated	Gao et al. 2020. Journal of Cancer; 11(14): 4284-4296
XPO1	BH4D shared	y		Liu et al. 2017. Nat. Genet. 49(8):1211-1320
ZBTB7A	BH4D shared	y		Liu et al. 2017. Nat. Genet. 49(8):1211-1321
ZFP36L2	BH4D shared	y		Liu et al. 2017. Nat. Genet. 49(8):1211-1322
ZMYM3	BH4D only in T-ALL	y		Liu et al. 2017. Nat. Genet. 49(8):1211-1323
