# Supplementary material for: Dynamics of broad H3K4me3 domains uncover an epigenetic switch between cell identity and cancer-related genes
Source: HighWire-hosted journal article supplement (doi:10.1101/gr.266924.120), 2021-06-23
Supplement: Supplemental_Table_S6_.xlsx [file Supplemental_Table_S6_.xlsx]

## Sheet: Feuil1
Supplemental Table S6. Gene expression and H3K4me3 changes at BH4D associated genes after PBIT treatment in Jurkat cells
Gene_Symbol	RNA-seq FPKM Log2(PBIT/DMSO)	ChIP-seq H3K4me3 Log2(PBIT/DMSO)
TRIM7	1.6534	1.95606
AEBP1	1.38047	2.04139
RASA3	1.28179	1.24395
SOX12	1.28047	2.04388
BTBD11	1.15806	1.58401
CEBPE	1.15747	0.557023
ADA	1.12072	1.86406
MXI1	1.11043	1.79361
SYK	1.10399	1.45701
MOCS1	1.02576	1.8453
PIEZO1	1.02004	2.03284
SMAD3	1.01499	1.60134
IVNS1ABP	0.925894	2.17982
ADCYAP1	0.881189	0.948221
CAMK4	0.867312	1.63647
JADE2	0.859749	2.17032
RNF213	0.858977	2.06241
INPP4A	0.841582	1.83247
GLB1L3	0.808895	1.60672
PLEKHF1	0.805239	1.91846
ITGA4	0.801074	1.53
NRN1	0.776942	2.08565
POLG	0.775391	1.84569
HDGFL2	0.772768	2.15537
ALDOA	0.7557	2.12483
ENO1	0.734162	2.25294
GXYLT2	0.714272	1.74682
ANXA2R	0.686916	1.68116
ZIC2	0.686728	1.82196
MID1IP1	0.666277	1.79295
ARID5B	0.663726	1.84832
SRPK1	0.655598	2.11387
IFI16	0.652068	1.28311
ZBTB7B	0.648966	1.3337
STK39	0.635556	2.00648
ZAP70	0.634668	1.43553
FNBP1	0.630313	1.97915
BCL11A	0.619988	1.97311
GALNT2	0.606575	2.24217
CCDC88C	0.60516	2.09521
FOXN3	0.602323	1.72809
IKZF1	0.595322	1.6693
MYC	0.588084	1.93886
UBA1	0.570706	1.85359
CCND2	0.566916	1.77046
FYN	0.559632	1.97439
HUWE1	0.552418	1.93468
ORAI2	0.551332	1.89241
PFKFB3	0.54791	1.80354
PLCG1	0.543552	1.76531
FOXP1	0.534731	1.58808
GRK5	0.533838	1.96642
SPTBN1	0.527444	1.71763
TCF7	0.522204	1.80627
HMGN4	0.509023	2.00552
HNRNPL	0.501695	2.27135
CSK	0.498486	2.06326
APBB1IP	0.497723	1.4687
FIBP	0.497717	2.00922
SHF	0.492898	2.07979
SMAD6	0.491014	1.958
SCD	0.489562	2.04646
IGF2BP1	0.483995	1.88476
PRKCA	0.469609	2.24947
ETS1	0.458553	1.44343
PPP6R1	0.456411	2.01974
PKM	0.448929	2.12395
IRF1	0.446685	1.86727
SMARCA2	0.438183	2.02648
TGIF1	0.43322	1.9529
CD1E	0.432044	0.255436
SSBP3	0.430712	2.15174
CD48	0.427602	0.410113
GRK2	0.423892	1.77193
LRRFIP1	0.417905	1.73162
SETD5	0.416102	2.16309
SLC1A5	0.41481	2.21304
PGK1	0.414279	1.89461
SIN3A	0.396641	2.27096
TM7SF3	0.395361	1.53469
CLUH	0.393208	2.16249
UCP2	0.387749	1.88383
PTCH1	0.384213	1.86378
SSRP1	0.380775	1.90707
RTN4	0.376603	2.04584
SIVA1	0.376153	2.06609
H3C4	0.374283	1.74305
HIVEP2	0.372307	1.93703
MAP2K3	0.372275	1.9189
ACSF3	0.365712	1.47028
TMEM131L	0.354533	1.97832
YBX1	0.340829	2.31406
INSIG1	0.33901	1.84352
LDB1	0.334059	1.92503
TICRR	0.330197	2.14369
GUK1	0.328586	1.97443
VPS13C	0.32782	2.08234
ATG16L2	0.321391	1.96519
LRP8	0.320577	2.24302
USP25	0.320197	2.13886
RHOG	0.319765	1.97199
IRF2BP2	0.318946	1.72471
FGF9	0.318308	1.99786
ALDH1A2	0.315995	0.952754
TMED3	0.311776	2.1135
CYFIP2	0.30529	1.76962
MNT	0.304516	2.07576
SIAH2	0.304293	2.2557
USP7	0.301027	1.96042
INPP5D	0.292245	1.3829
KDM6B	0.291924	1.95184
STAM	0.290498	2.30533
MLLT3	0.289767	1.85954
MYCN	0.277571	1.5176
NFE2L1	0.274951	2.24762
TBL1XR1	0.265678	2.06478
SLC38A1	0.255888	2.25648
PTP4A2	0.253818	1.67091
PIGV	0.245154	1.9838
CDCA7	0.239097	2.04687
SASH3	0.237141	1.42276
TNPO2	0.236572	2.33545
ATP2A3	0.235895	1.75409
SEPTIN9	0.233566	1.29046
CLEC2B	0.229088	1.19496
VIM	0.226561	2.0007
RCC1	0.226059	2.33922
GYPC	0.222026	1.73762
STT3B	0.219841	2.11576
TMEM243	0.218674	2.10497
MBP	0.215391	2.10046
XPO1	0.213196	2.02156
CAPN15	0.210161	2.20657
MLXIP	0.208923	1.99208
LMO4	0.204968	1.98607
CD47	0.201385	1.95731
IGF2BP3	0.200755	2.11687
STAG2	0.200122	1.86038
RB1	0.197962	2.24428
ELMSAN1	0.19562	1.92404
ELMSAN1	0.19562	1.49367
ZNF367	0.194527	2.18231
BCL11B	0.192702	1.90933
LDLRAD4	0.186409	2.08865
LDLRAD4	0.186409	0.383239
USP44	0.182392	1.55258
ARHGDIB	0.180658	1.42323
THEMIS	0.179804	1.21761
PPP1R9B	0.179347	1.86327
MAP4K4	0.174917	1.92679
ZNFX1	0.174912	2.25901
HIVEP3	0.173523	1.64145
RCC2	0.165859	2.34212
BORCS6	0.16469	2.15244
GRK3	0.158988	1.85097
WDR74	0.153504	2.18803
SLBP	0.1503	2.21978
CTBP1	0.149943	2.06422
IKZF2	0.149274	1.4954
ACBD5	0.148494	2.20208
SRRM2	0.14791	2.14259
FRYL	0.14389	2.1187
SGMS1	0.143128	2.13481
TOB2	0.137691	2.09402
PRKD2	0.137354	1.84821
TAL1	0.132166	1.58345
UBE2H	0.129204	1.88559
BCR	0.128409	1.63769
PRKCQ	0.126126	1.73457
LCP1	0.125573	1.86192
MYH9	0.122183	2.09867
RNASEH2B	0.11624	1.71364
MND1	0.113577	1.79731
SHQ1	0.113356	1.9221
ILF3	0.109537	2.47449
KMT2E	0.10456	2.10878
RAB40C	0.0984931	2.20845
FMNL1	0.094593	1.7973
BMP4	0.0902539	1.64246
GRK6	0.0901782	1.7202
NAP1L4	0.088877	2.15752
TRIM8	0.0880121	2.07217
RFX3	0.0877566	1.98316
CHD4	0.0862642	1.91888
CTDP1	0.0858797	1.84184
EDEM1	0.0792397	2.02341
EVL	0.0781913	0.306512
HNRNPD	0.0732392	2.19567
ALKBH5	0.071799	2.07234
JARID2	0.0652587	2.12586
MAPKAPK5	0.064122	2.26081
TMSB4X	0.0626606	1.44754
GLRX5	0.0569653	2.20307
AFF1	0.0562784	1.36476
IRX5	0.0527538	2.22278
RHOH	0.0502901	1.56462
SOX11	0.048472	1.43483
MGAT1	0.0464555	1.75941
TLE3	0.0449318	2.02314
JADE1	0.0425119	2.10443
KCMF1	0.0305586	2.18816
HNRNPU	0.0264107	2.32581
TMEM97	0.0250301	2.07226
MAT2B	0.0246682	2.03358
TOX	0.0183573	2.09262
WDR1	0.0181458	2.07765
GNB1	0.0138647	2.33381
DCAF12	0.0123561	1.96472
MPRIP	0.011265	1.86122
ANP32B	0.0105599	2.1407
CSDE1	0.00939161	2.03143
MIDN	0.00811402	2.15776
ERGIC1	0.00657531	1.91103
IDH2	0.00103493	2.03738
NR4A3	0	1.85069
MAML3	0	1.59097
C20orf197	0	0.114414
KLF12	-2.89653e-05	2.20047
STIM1	-0.00250896	1.63241
ATP2B4	-0.00729641	1.7866
ARID1B	-0.0125536	2.15238
ARID1A	-0.0141194	2.16797
MBNL2	-0.0146437	1.43984
CCND3	-0.0176069	1.92478
RALY	-0.0207816	2.08661
RORA	-0.020859	2.19711
RCSD1	-0.0216547	1.68262
E2F3	-0.0239485	2.31825
