# Supplementary figures and images for: Dynamics of broad H3K4me3 domains uncover an epigenetic switch between cell identity and cancer-related genes
Source: HighWire-hosted journal article supplement (doi:10.1101/gr.266924.120), 2021-06-23

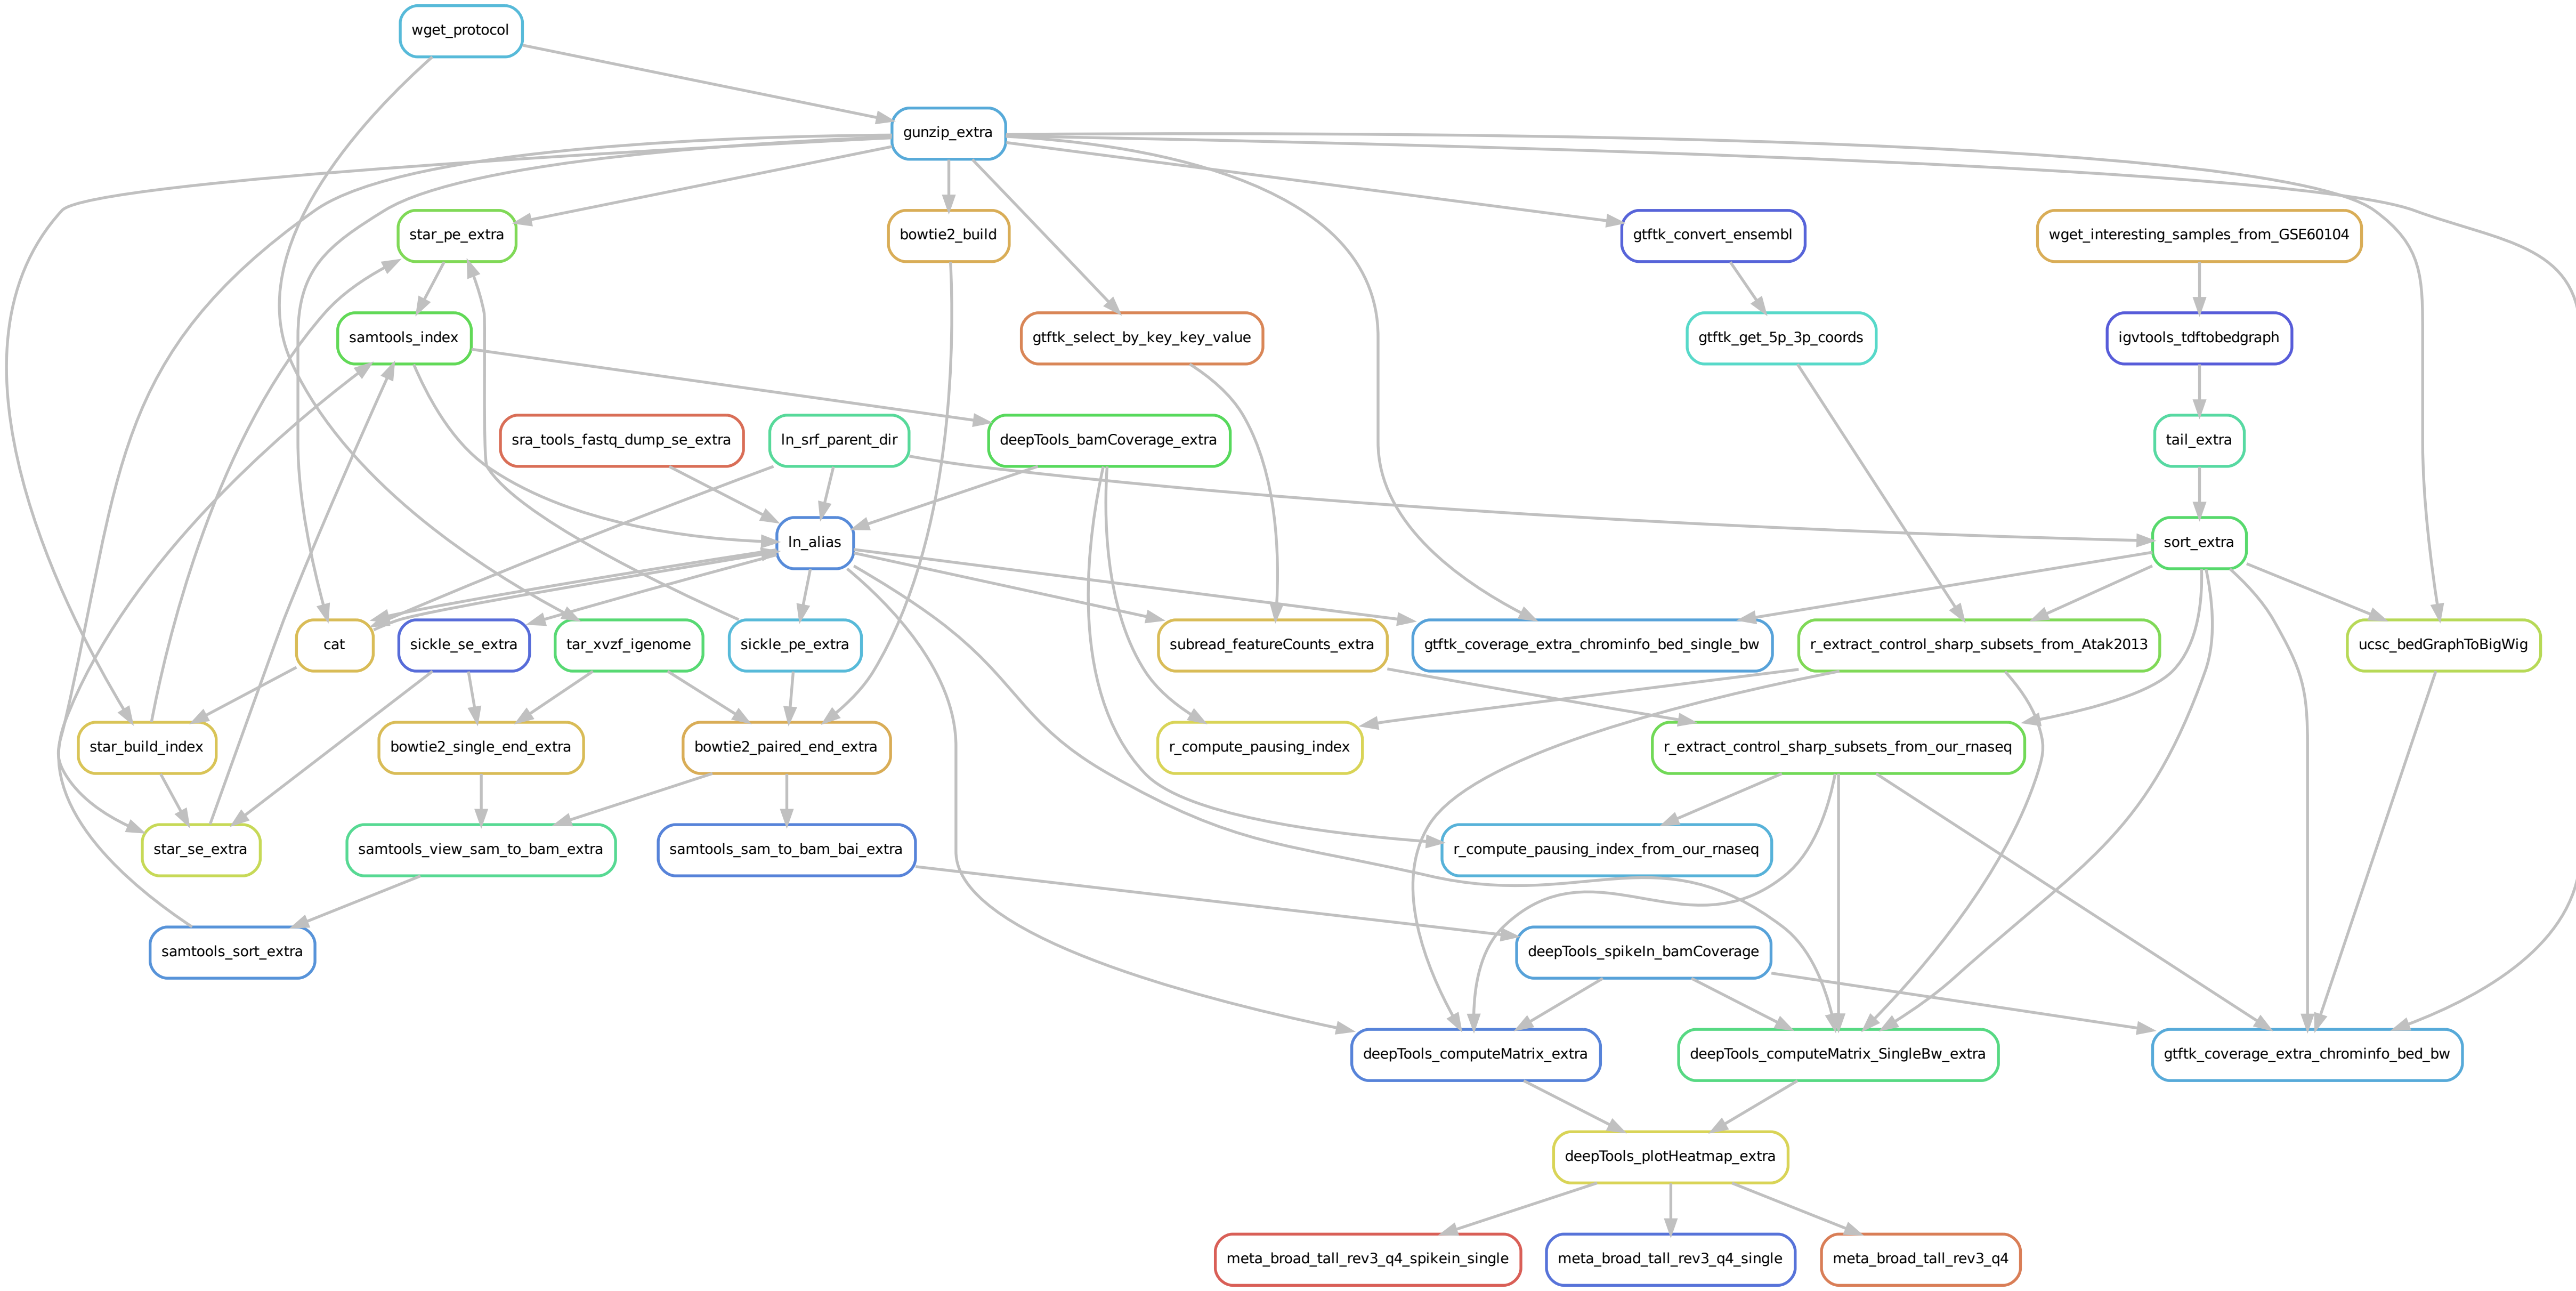

Supplement: Supplemental_codeS1.zip [file all_rulegraph.pdf › mw-belhocine2021-only-code/out/snakemake/all_rulegraph.pdf]
